# Supplementary material for: A Catalog of Coding Sequence Variations in Salivary Proteins’ Genes Occurring during Recent Human Evolution
Source: MDPI journal article supplement (doi:10.3390/ijms241915010), 2023-10-09

PRB1: rs554211998

chr12:11506784 T/C

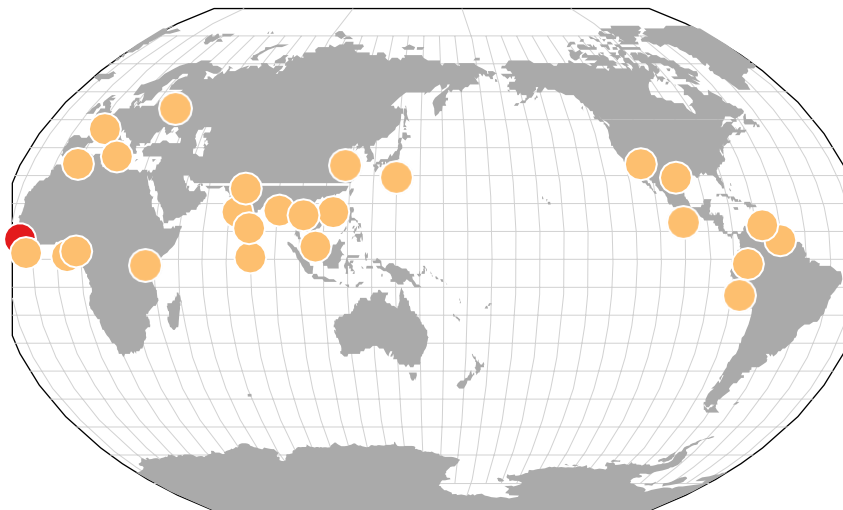

*Frequency Scale = Proportion out of 0.01*

The pie below represents a minor allele frequency of 0.0025

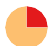

Sample sizes below 30 become increasingly transparent to represent uncertain frequencies, i.e.

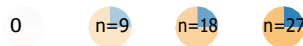

*PRB1*: rs534597111

chr12:11506723 A/C

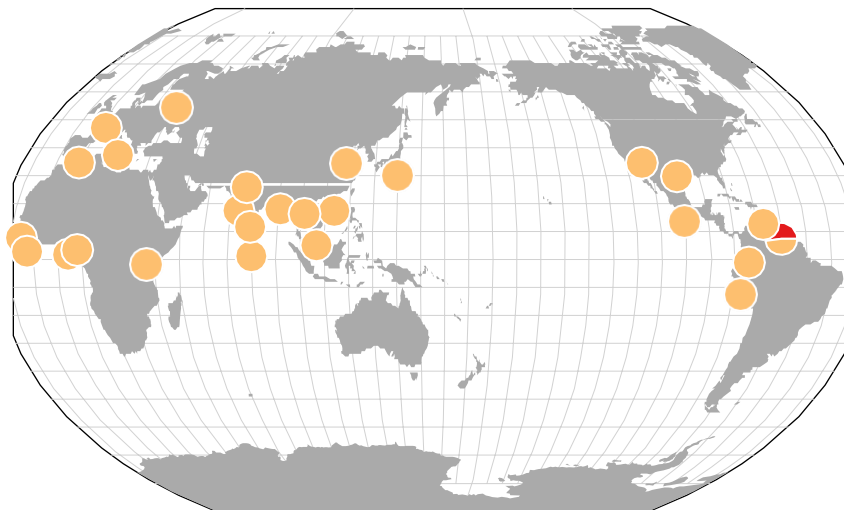

*Frequency Scale = Proportion out of 0.01*

The pie below represents a minor allele frequency of 0.0025



Sample sizes below 30 become increasingly transparent to represent uncertain frequencies, i.e.



*PRB1*: rs369001998

chr12:11506369 A/G

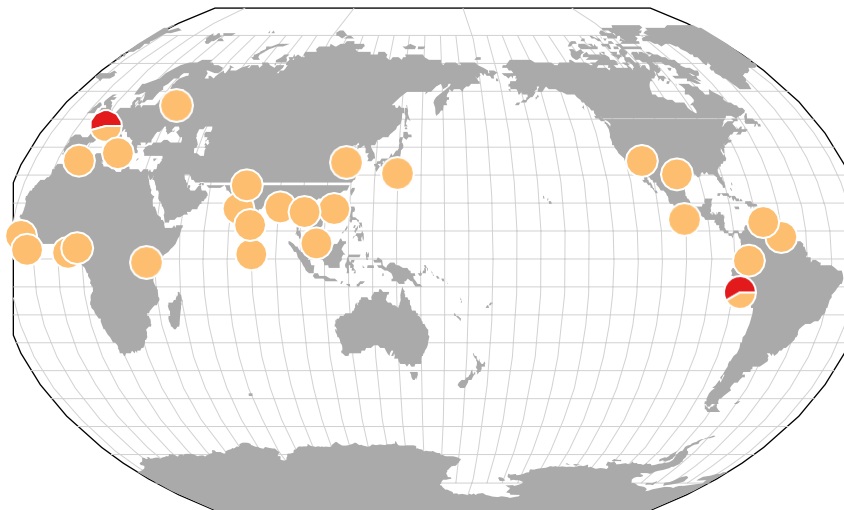

*Frequency Scale = Proportion out of 0.01*

The pie below represents a minor allele frequency of 0.0025

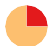

Sample sizes below 30 become increasingly transparent to represent uncertain frequencies, i.e.

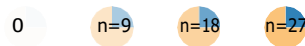

PRB2: rs188924826

chr12:11546899 T/C

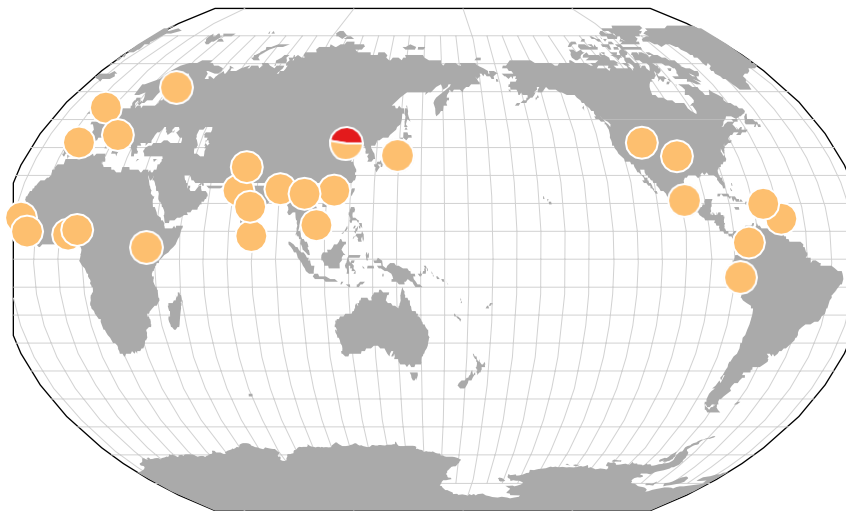

*Frequency Scale = Proportion out of 0.01*

The pie below represents a minor allele frequency of 0.0025

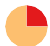

Sample sizes below 30 become increasingly transparent to represent uncertain frequencies, i.e.

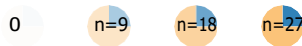

PRB2: rs201994479

chr12:11546764 T/G

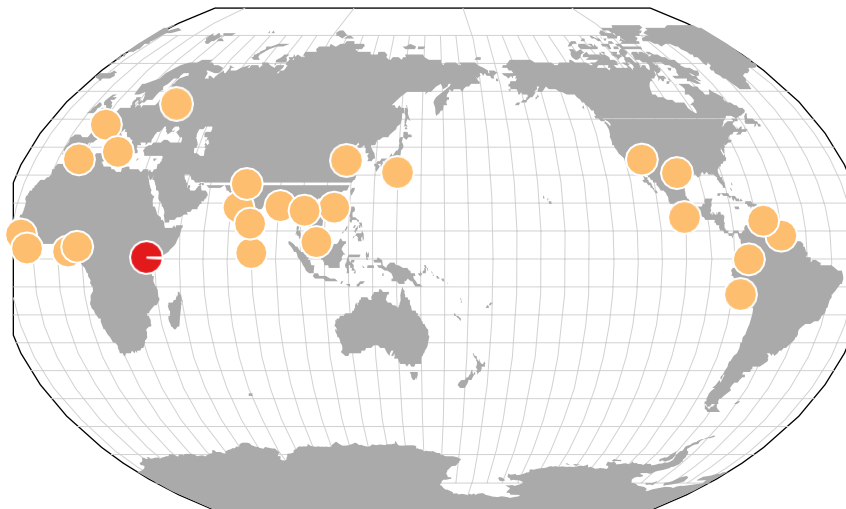

*Frequency Scale = Proportion out of 0.01*

The pie below represents a minor allele frequency of 0.0025

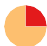

Sample sizes below 30 become increasingly transparent to represent uncertain frequencies, i.e.



PRB2: rs201392419

chr12:11546462 T/G

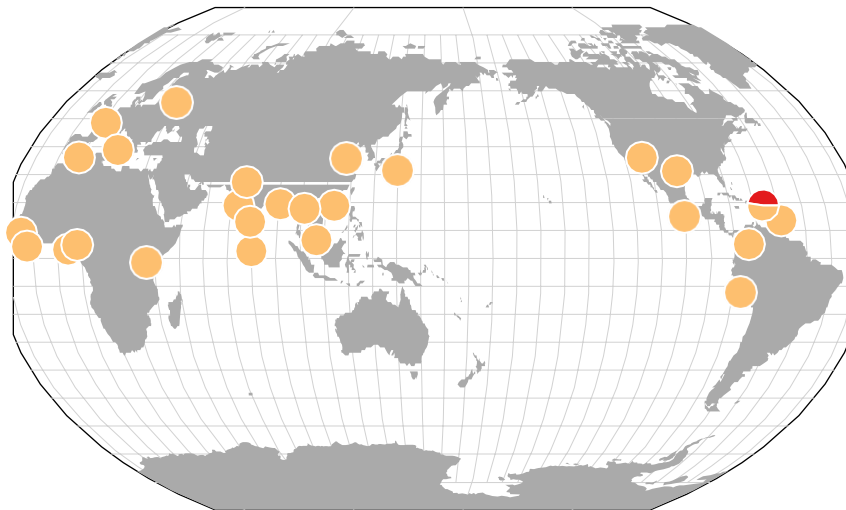

*Frequency Scale = Proportion out of 0.01*

The pie below represents a minor allele frequency of 0.0025



Sample sizes below 30 become increasingly transparent to represent uncertain frequencies, i.e.



PRB2:rs11054277

chr12:11546395 T/G

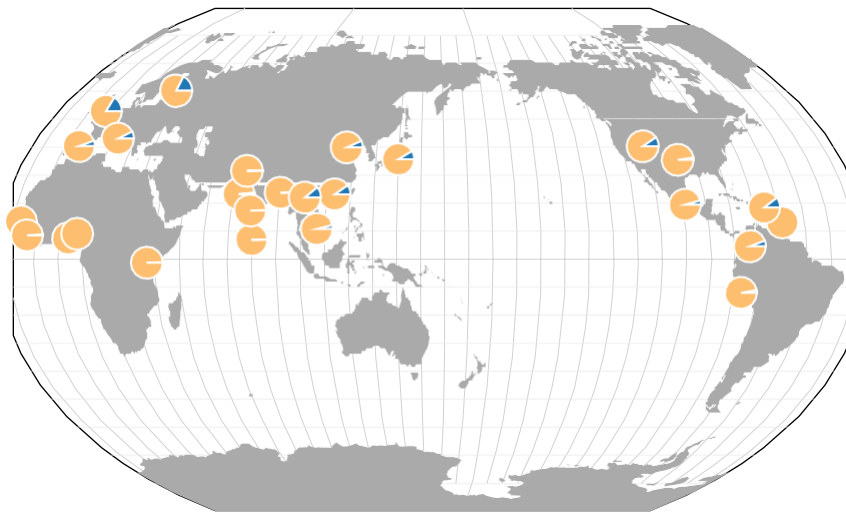

*Frequency Scale = Proportion out of 1*  
The pie below represents a minor allele frequency of 0.25

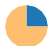

Sample sizes below 30 become increasingly transparent to represent uncertain frequencies, i.e.

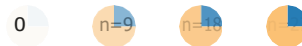

PRB2:rs34305575

chr12:11546314 C/T

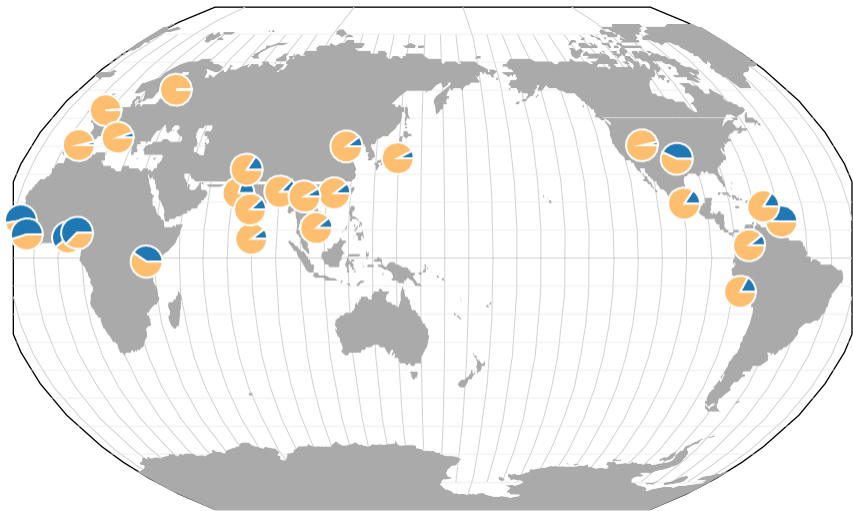

*Frequency Scale = Proportion out of 1*  
The pie below represents a minor allele frequency of 0.25

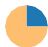

Sample sizes below 30 become increasingly transparent to represent uncertain frequencies, i.e.

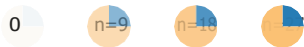



PRB2:rs201391404

chr12:11546023 T/G

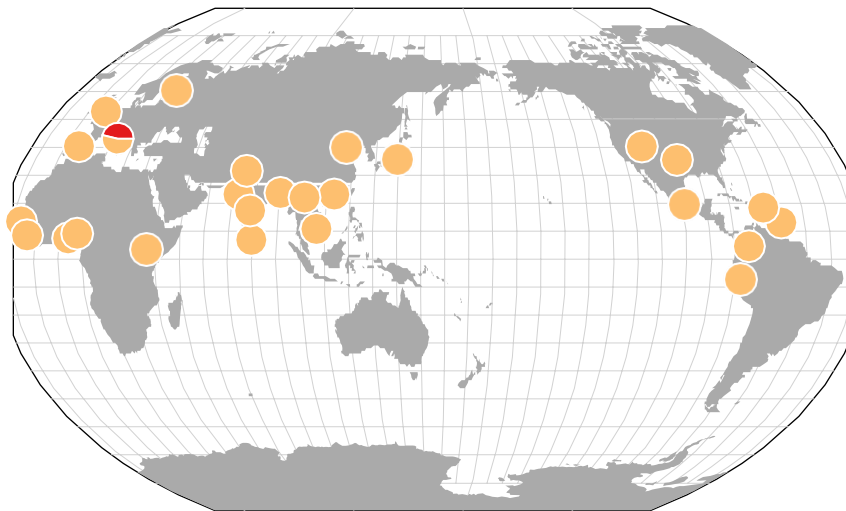

*Frequency Scale = Proportion out of 0.01*

The pie below represents a minor allele frequency of 0.0025

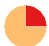

Sample sizes below 30 become increasingly transparent to represent uncertain frequencies, i.e.

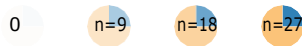

PRB3: rs533382585

chr12:11421002 A/G

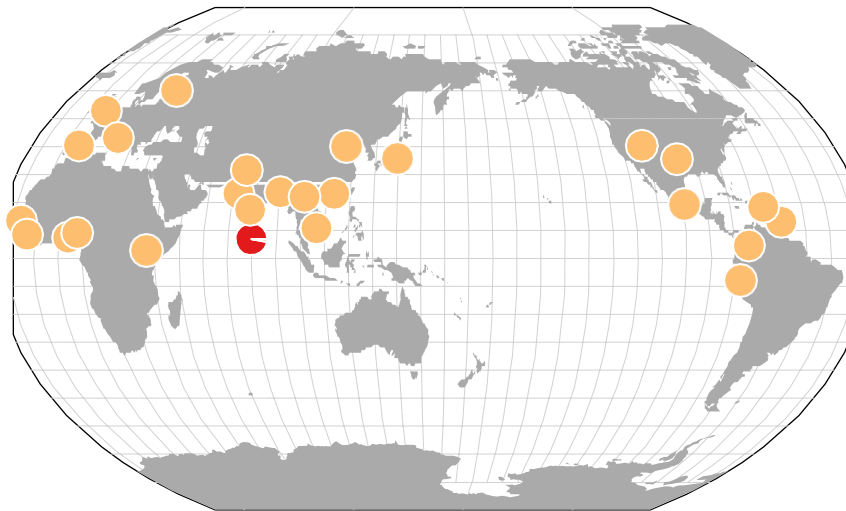

*Frequency Scale = Proportion out of 0.01*

The pie below represents a minor allele frequency of 0.0025



Sample sizes below 30 become increasingly transparent to represent uncertain frequencies, i.e.



*CST1*:rs6076122

chr20:23731494 A/G

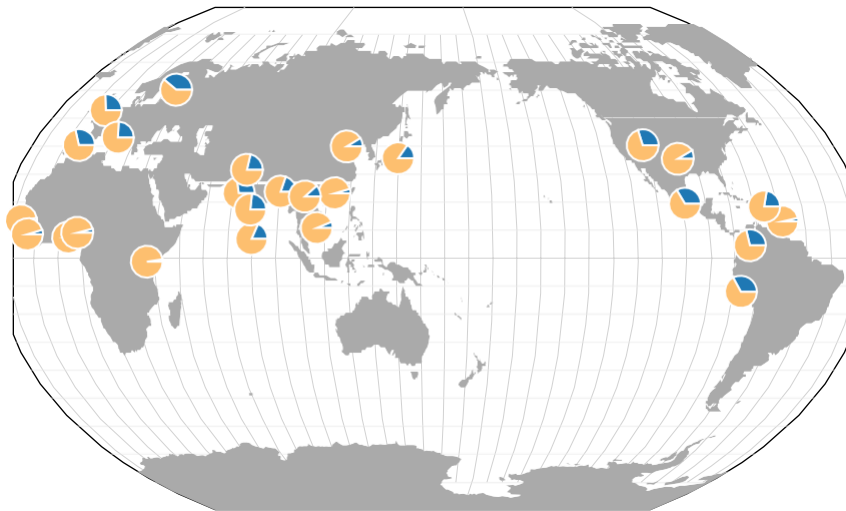

*Frequency Scale = Proportion out of 1*

The pie below represents a minor allele frequency of 0.25



Sample sizes below 30 become increasingly transparent to represent uncertain frequencies, i.e.

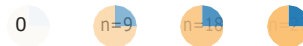

*CST1*:rs368203290

chr20:23731344 T/C

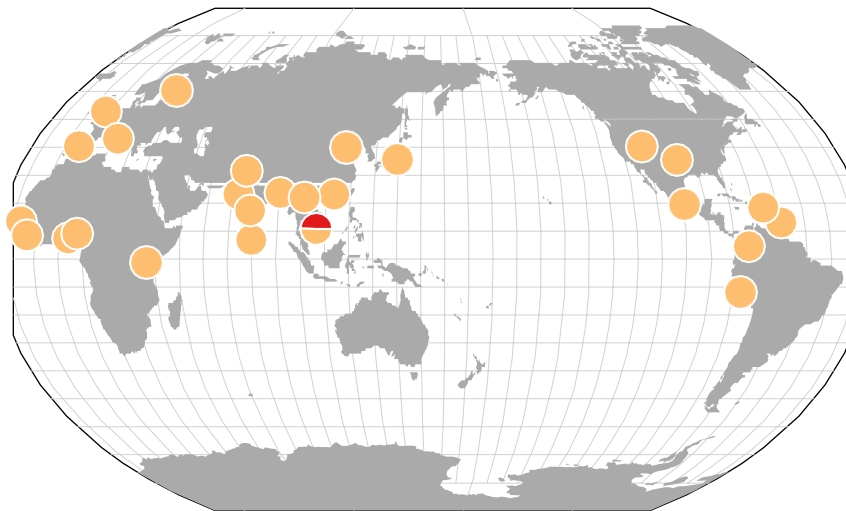

*Frequency Scale = Proportion out of 0.01*

The pie below represents a minor allele frequency of 0.0025

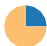

Sample sizes below 30 become increasingly transparent to represent uncertain frequencies, i.e.



*CST1*:rs111349461

chr20:23807162 A/G

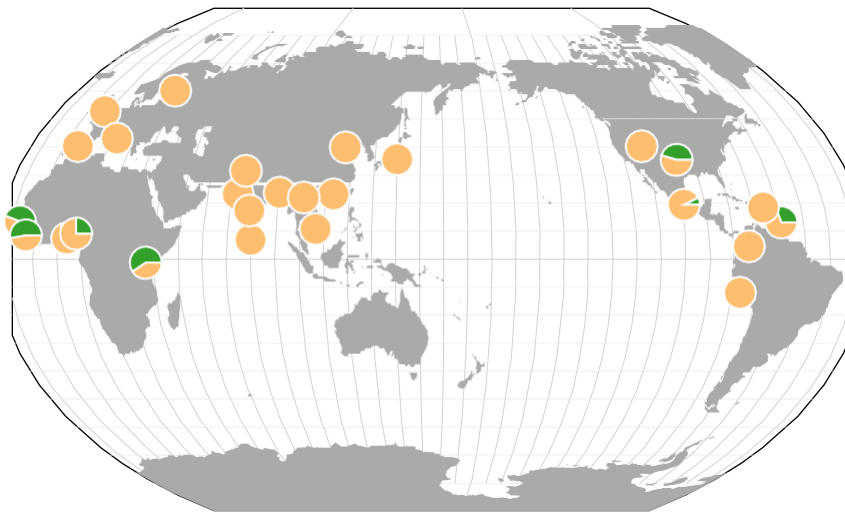

*Frequency Scale = Proportion out of 0.1*

The pie below represents a minor allele frequency of 0.025

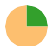

Sample sizes below 30 become increasingly transparent to represent uncertain frequencies, i.e.

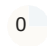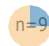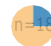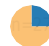

CST1:rs55860552

chr20:23807093 A/G

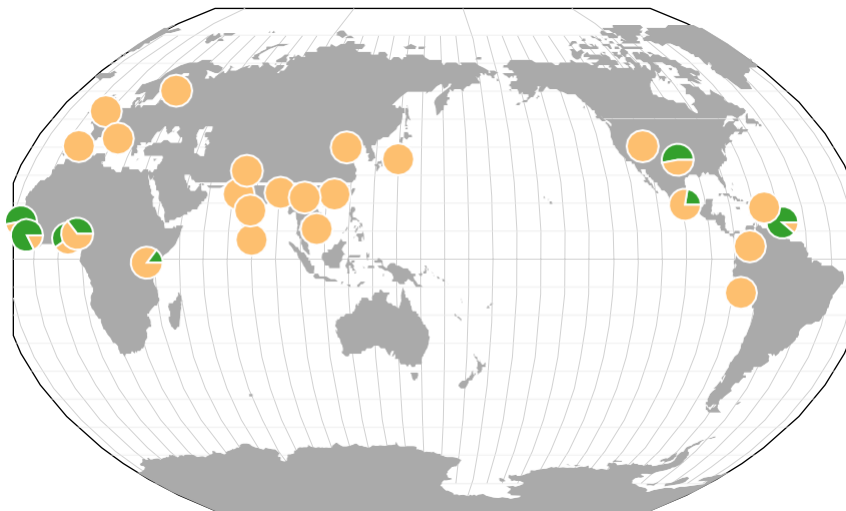

*Frequency Scale = Proportion out of 0.1*

The pie below represents a minor allele frequency of 0.025



Sample sizes below 30 become increasingly transparent to represent uncertain frequencies, i.e.



*CST1*:rs568411970

chr20:23807084 A/G

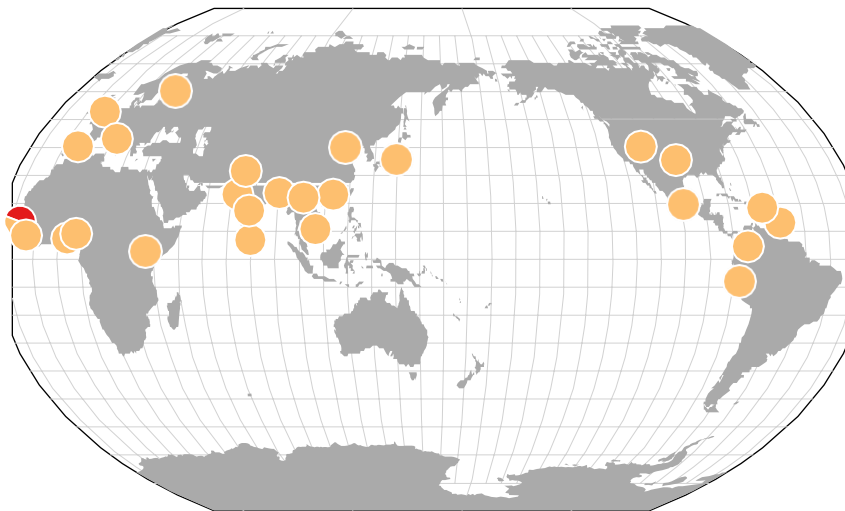

*Frequency Scale = Proportion out of 0.01*

The pie below represents a minor allele frequency of 0.0025

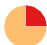

Sample sizes below 30 become increasingly transparent to represent uncertain frequencies, i.e.

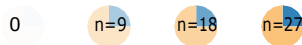

*CST1*:rs202150666

chr20:23804691 C/A

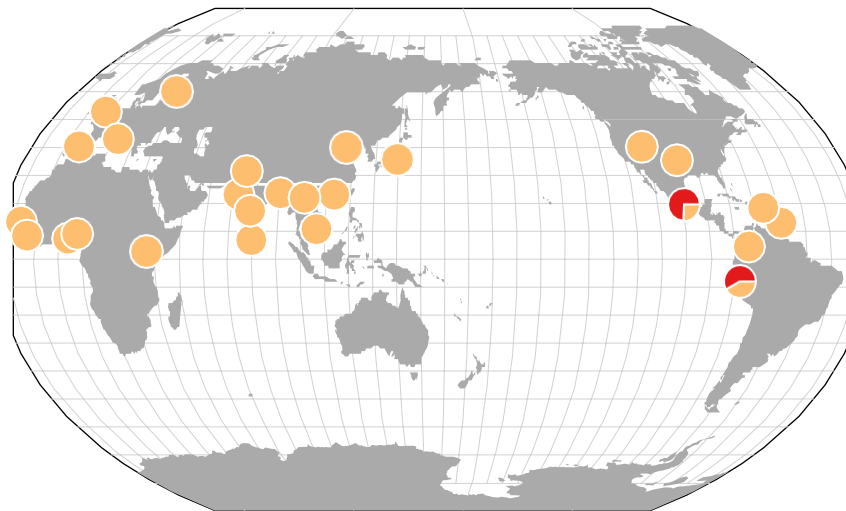

*Frequency Scale = Proportion out of 0.01*

The pie below represents a minor allele frequency of 0.0025



Sample sizes below 30 become increasingly transparent to represent uncertain frequencies, i.e.

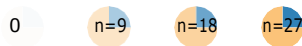



CST5:rs145031249

chr20:23860243 A/G

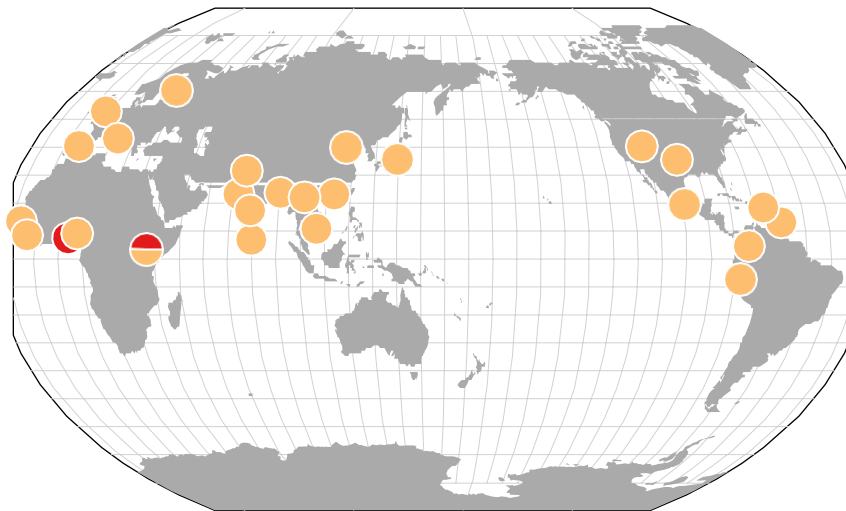

*Frequency Scale = Proportion out of 0.01*

The pie below represents a minor allele frequency of 0.0025



Sample sizes below 30 become increasingly transparent to represent uncertain frequencies, i.e.



CST5:rs1799841

chr20:23860178 A/G

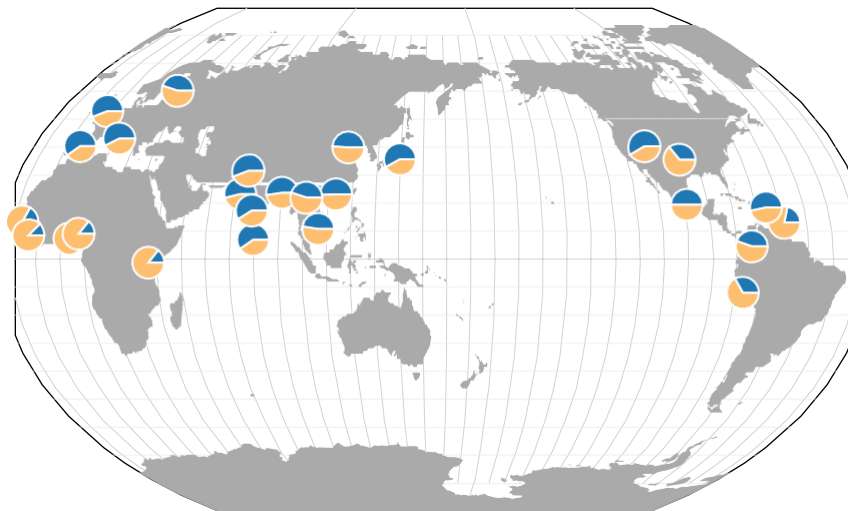

*Frequency Scale = Proportion out of 1*

The pie below represents a minor allele frequency of 0.25



Sample sizes below 30 become increasingly transparent to represent uncertain frequencies, i.e.

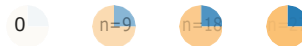

CST5:rs41282292

chr20:23858200 A/G

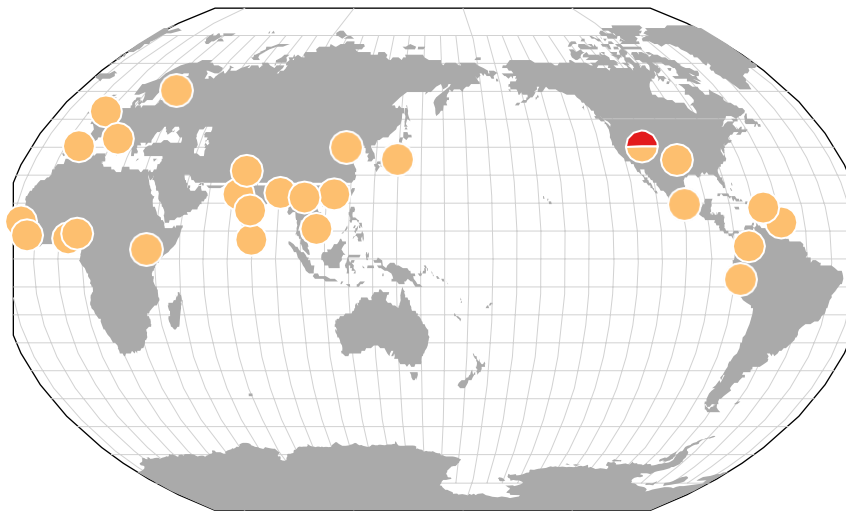

*Frequency Scale = Proportion out of 0.01*

The pie below represents a minor allele frequency of 0.0025



Sample sizes below 30 become increasingly transparent to represent uncertain frequencies, i.e.



CSTB: rs559906825

chr21:45194562 T/C

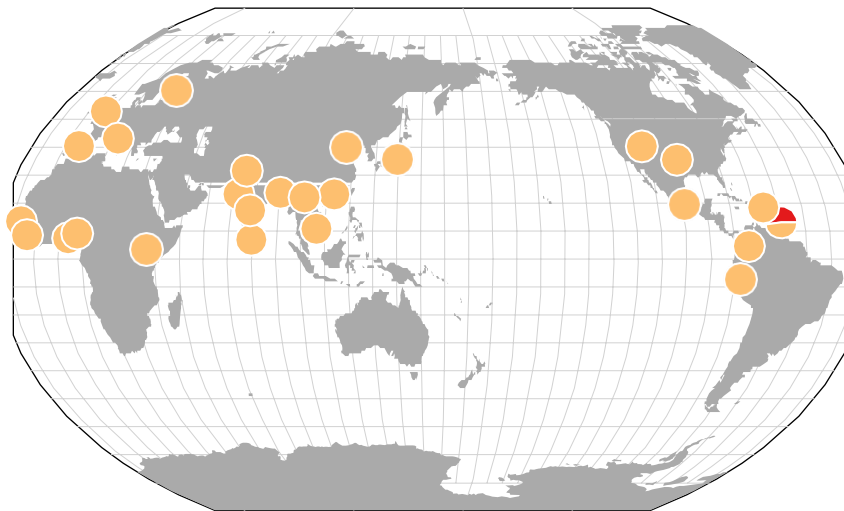

*Frequency Scale = Proportion out of 0.01*

The pie below represents a minor allele frequency of 0.0025



Sample sizes below 30 become increasingly transparent to represent uncertain frequencies, i.e.

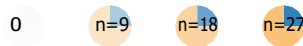

Supplement: s1 [file s1]
