# Supplementary material for: A Catalog of Coding Sequence Variations in Salivary Proteins’ Genes Occurring during Recent Human Evolution
Source: MDPI journal article supplement (doi:10.3390/ijms241915010), 2023-10-09
Supplement: s1 [file s1]

Table S10. Nucleotide Substitutions in *SMR3B* gene in introns and regulatory regions

| Genomic Coordinates (hg19) | Gene Region     |   |          | Chagyrskaya         | Vindija             | Denisovan (Variant Frequency) | Codon → amino acid |
|----------------------------|-----------------|---|----------|---------------------|---------------------|-------------------------------|--------------------|
|                            |                 |   |          | (Variant Frequency) | (Variant Frequency) |                               |                    |
| 71,248,560                 | Upstream region | G | G (98%)  | G (100%)            | A (13%)             | G (100%)                      |                    |
| 71,248,568                 | Upstream region | G | G (100%) | A (11%)             | A (8%)*             | G (100%)                      |                    |
| 71,248,590                 | Upstream region | C | C (100%) | T (11%)             | T (7%)*             | C (100%)                      |                    |
| 71,248,861                 | 5' UTR          | G | G (100%) | G (100%)            | A (12%)             | G (100%)                      |                    |
| 71,248,913                 | 5' UTR          | C | C (98%)  | C (100%)            | T (13%)             | C (100%)                      |                    |
| 71,248,914                 | 5' UTR          | A | G (98%)  | G (100%)            | G (96%)             | G (100%)                      |                    |
| 71,248,933                 | Intron 1        | G | G (100%) | A (6%)*             | A (13%)             | G (100%)                      |                    |
| 71,248,937                 | Intron 1        | C | C (100%) | T (3%)*             | T (13%)             | C (100%)                      |                    |
| 71,249,018                 | Intron 1        | G | G (100%) | A (11%)             | G (100%)            | G (100%)                      |                    |
| 71,249,052                 | Intron 1        | C | C (100%) | C (100%)            | C (100%)            | T (100%)                      |                    |
| 71,249,061                 | Intron 1        | C | C (100%) | C (100%)            | T (14%)             | C (100%)                      |                    |
| 71,249,065                 | Intron 1        | C | C (98%)  | T (3%)*             | T (16%)             | C (100%)                      |                    |
| 71,249,140                 | Intron 1        | G | G (100%) | G (100%)            | A (11%)             | G (100%)                      |                    |
| 71,249,145                 | Intron 1        | G | G (100%) | A (11%)             | A (5%)*             | G (100%)                      |                    |
| 71,249,242                 | Intron 1        | G | G (100%) | A (18%)             | G (100%)            | G (100%)                      |                    |
| 71,249,289                 | Intron 1        | G | G (99%)  | A (11%)             | A (7%)*             | G (100%)                      |                    |
| 71,249,361                 | Intron 1        | C | C (100%) | C (100%)            | T (12%)             | C (100%)                      |                    |
| 71,249,365                 | Intron 1        | C | C (100%) | T (11%)             | T (8%)*             | C (100%)                      |                    |
| 71,249,426                 | Intron 1        | G | G (100%) | G (100%)            | A (12%)             | G (100%)                      |                    |
| 71,249,434                 | Intron 1        | C | C (100%) | T (8%)*             | T (14%)             | C (100%)                      |                    |
| 71,249,441                 | Intron 1        | T | T (100%) | T (100%)            | T (100%)            | A (100%)                      |                    |
| 71,249,472                 | Intron 1        | G | A (3%)*  | A (7%)*             | A (11%)             | G (100%)                      |                    |
| 71,249,476                 | Intron 1        | A | A (100%) | A (100%)            | A (100%)            | G (100%)                      |                    |
| 71,249,484                 | Intron 1        | C | C (100%) | C (100%)            | T (17%)             | C (100%)                      |                    |
| 71,249,487                 | Intron 1        | G | G (100%) | A (10%)*            | A (11%)             | G (100%)                      |                    |
| 71,249,488                 | Intron 1        | G | G (100%) | A (4%)*             | A (11%)             | G (100%)                      |                    |
| 71,249,593                 | Intron 1        | C | C (95%)  | T (3%)*             | T (16%)             | C (100%)                      |                    |
| 71,249,604                 | Intron 1        | G | G (100%) | G (100%)            | A (11%)             | G (100%)                      |                    |
| 71,249,629                 | Intron 1        | T | T (100%) | T (100%)            | T (100%)            | C (100%)                      |                    |
| 71,249,671                 | Intron 1        | G | G (100%) | G (100%)            | A (12%)             | G (100%)                      |                    |

|            |          |   |            |            |            |            |
|------------|----------|---|------------|------------|------------|------------|
| 71,249,733 | Intron 1 |   | InsT (78%) | InsT (74%) | InsT (78%) | InsT (7%)* |
| 71,249,743 | Intron 1 | C | C (100%)   | T (11%)    | T (3%)*    | T (3%)*    |
| 71,249,744 | Intron 1 | C | C (100%)   | T (11%)    | C (100%)   | C (100%)   |
| 71,249,756 | Intron 1 | C | C (100%)   | T (15%)    | C (100%)   | C (100%)   |
| 71,249,836 | Intron 1 | G | G (98%)    | G (100%)   | A (11%)    | G (100%)   |
| 71,249,839 | Intron 1 | T | C (98%)    | C (100%)   | C (91%)    | T (100%)   |
| 71,249,901 | Intron 1 | C | C (100%)   | C (100%)   | T (12%)    | C (100%)   |
| 71,249,908 | Intron 1 | G | G (100%)   | A (10%)*   | A (15%)    | G (100%)   |
| 71,249,921 | Intron 1 | G | G (100%)   | A (12%)    | A (3%)*    | G (100%)   |
| 71,249,966 | Intron 1 | T | T (100%)   | T (100%)   | C (57%)    | T (100%)   |
| 71,250,060 | Intron 1 | C | C (100%)   | G (4%)*    | G (43%)    | C (100%)   |
| 71,250,203 | Intron 1 | C | C (100%)   | T (7%)*    | T (15%)    | C (100%)   |
| 71,250,286 | Intron 2 | G | G (100%)   | A (13%)    | G (100%)   | G (100%)   |
| 71,250,287 | Intron 2 | T | T (100%)   | T (100%)   | C (15%)    | T (100%)   |
| 71,250,308 | Intron 2 | T | A (100%)   | A (100%)   | A (100%)   | A (100%)   |
| 71,250,329 | Intron 2 | C | C (100%)   | T (5%)*    | T (12%)    | C (100%)   |
| 71,250,399 | Intron 2 | A | G (98%)    | G (100%)   | G (100%)   | G (100%)   |
| 71,250,415 | Intron 2 | G | G (100%)   | A (12%)    | A (9%)*    | G (100%)   |
| 71,250,521 | Intron 2 | G | A (2%)*    | G (100%)   | A (20%)    | A (4%)*    |
| 71,250,550 | Intron 2 | C | C (100%)   | T (11%)    | T (5%)*    | C (100%)   |
| 71,250,564 | Intron 2 | G | G (100%)   | A (7%)*    | A (13%)    | G (100%)   |
| 71,250,570 | Intron 2 | C | C (100%)   | T (13%)    | C (97%)    | C (100%)   |
| 71,250,583 | Intron 2 | G | G (99%)    | A (14%)    | G (100%)   | G (100%)   |
| 71,250,657 | Intron 2 | T | C (100%)   | C (100%)   | C (88%)    | T (100%)   |
| 71,250,711 | Intron 2 | G | G (100%)   | A (13%)    | G (100%)   | G (100%)   |
| 71,250,716 | Intron 2 | G | A (100%)   | A (100%)   | A (100%)   | G (100%)   |
| 71,250,743 | Intron 2 | T | T (100%)   | T (100%)   | C (11%)    | T (100%)   |
| 71,250,769 | Intron 2 | G | A (100%)   | A (100%)   | A (100%)   | A (100%)   |
| 71,250,835 | Intron 2 | G | G (100%)   | G (100%)   | A (13%)    | G (100%)   |
| 71,250,977 | Intron 2 | A | A (100%)   | A (100%)   | A (100%)   | T (100%)   |
| 71,251,066 | Intron 2 | C | C (100%)   | T (11%)    | C (100%)   | C (100%)   |
| 71,251,115 | Intron 2 | G | G (100%)   | T (20%)    | T (7%)*    | G (100%)   |
| 71,251,116 | Intron 2 | T | delT (14%) | T (100%)   | delT (32%) | delT (46%) |
| 71,251,117 | Intron 2 | T | delT (12%) | T (100%)** | delT (11%) | delT (43%) |
| 71,251,137 | Intron 2 | T | G (4%)*    | T (100%)** | G (12%)    | T (100%)   |

|            |          |   |            |            |            |             |
|------------|----------|---|------------|------------|------------|-------------|
| 71,251,138 | Intron 2 | T | A (4%)*    | T (100%)** | A (12%)    | T (92%)     |
| 71,251,299 | Intron 2 | T | T (100%)   | T (100%)   | T (100%)   | A (15%)     |
| 71,251,313 | Intron 2 | G | G (100%)   | A (5%)*    | G (100%)   | A (10%)*    |
| 71,251,367 | Intron 2 | A | C (13%)    | C (18%)    | C (4%)*    | C (11%)     |
| 71,251,375 | Intron 2 | C | C (100%)   | T (11%)    | C (100%)   | C (100%)    |
| 71,251,469 | Intron 2 |   | -          | -          | InsA (11%) | -           |
| 71,251,514 | Intron 2 | C | C (100%)   | T (11%)    | C (100%)   | C (100%)    |
| 71,251,609 | Intron 2 | C | C (99%)    | T (12%)    | T (3%)*    | C (100%)    |
| 71,251,669 | Intron 2 | T | A (98%)    | A (97%)    | A (100%)   | T (100%)    |
| 71,251,716 | Intron 2 | C | C (100%)   | T (11%)    | C (100%)   | C (100%)    |
| 71,251,718 | Intron 2 | C | C (100%)   | T (4%)*    | T (13%)    | C (100%)    |
| 71,251,804 | Intron 2 | A | G (95%)    | G (95%)    | G (100%)   | A (100%)    |
| 71,251,815 | Intron 2 | C | A (96%)    | A (98%)    | A (100%)   | C (100%)    |
| 71,251,848 | Intron 2 | G | G (98%)    | A (12%)    | G (100%)   | G (100%)    |
| 71,251,989 | Intron 2 |   | InsA (16%) | -          | -          | InsA (20%)  |
| 71,251,990 | Intron 2 |   | InsA (16%) | -          | InsA (29%) | InsA (20%)  |
| 71,252,145 | Intron 2 | G | G (100%)   | A (4%)*    | A (11%)    | G (100%)    |
| 71,252,158 | Intron 2 |   | -          | -          | -          | InsAC (77%) |
| 71,252,168 | Intron 2 | C | C (100%)   | C (100%)   | T (11%)    | C (100%)    |
| 71,252,239 | Intron 2 | C | C (100%)   | C (100%)   | T (17%)    | C (100%)    |
| 71,252,240 | Intron 2 | C | C (100%)   | C (100%)   | T (17%)    | C (100%)    |
| 71,252,241 | Intron 2 | G | A (100%)   | A (100%)   | A (100%)   | G (97%)     |
| 71,252,261 | Intron 2 | C | C (100%)   | T (12%)    | T (7%)*    | C (100%)    |
| 71,252,298 | Intron 2 | G | G (100%)   | G (100%)   | A (18%)    | G (100%)    |
| 71,252,310 | Intron 2 | C | C (98%)    | C (100%)   | C (100%)   | A (100%)    |
| 71,252,311 | Intron 2 | G | A (100%)   | A (100%)   | A (100%)   | G (100%)    |
| 71,252,314 | Intron 2 | G | G (98%)    | A (11%)    | A (3%)*    | G (100%)    |
| 71,252,332 | Intron 2 | G | G (100%)   | G (100%)   | A (11%)    | G (100%)    |
| 71,252,376 | Intron 2 | G | A (3%)*    | G (97%)    | A (11%)    | G (100%)    |
| 71,252,448 | Intron 2 | C | T (100%)   | T (100%)   | T (100%)   | C (100%)    |
| 71,252,470 | Intron 2 | G | A (4%)*    | A (3%)*    | A (12%)    | G (100%)    |
| 71,252,537 | Intron 2 | A | G (98%)    | G (97%)    | G (98%)    | A (100%)    |
| 71,252,694 | Intron 2 | C | C (98%)    | T (3%)*    | T (11%)    | C (100%)    |
| 71,252,882 | Intron 2 | C | C (100%)   | T (12%)    | T (5%)*    | C (100%)    |
| 71,252,947 | Intron 2 | T | T (100%)   | T (100%)   | T (100%)   | C (100%)    |

|            |          |   |            |            |            |             |
|------------|----------|---|------------|------------|------------|-------------|
| 71,252,977 | Intron 2 | G | G (100%)   | A (5%)*    | A (13%)    | G (100%)    |
| 71,252,994 | Intron 2 | G | G (100%)   | A (11%)    | G (100%)   | A (3%)*     |
| 71,253,001 | Intron 2 | G | G (98%)    | A (11%)    | G (100%)   | G (100%)    |
| 71,253,017 | Intron 2 | G | G (100%)   | A (3%)*    | A (12%)    | G (100%)    |
| 71,253,024 | Intron 2 | C | T (2%)*    | C (97%)    | T (11%)    | C (100%)    |
| 71,253,074 | Intron 2 | T | A (100%)   | A (100%)   | A (100%)   | T (100%)    |
| 71,253,085 | Intron 2 | G | G (100%)   | A (14%)    | G (100%)   | G (100%)    |
| 71,253,153 | Intron 2 | G | A (98%)    | A (100%)   | A (100%)   | G (100%)    |
| 71,253,270 | Intron 2 | G | G (100%)   | A (11%)    | A (8%)*    | G (100%)    |
| 71,253,281 | Intron 2 | G | A (2%)*    | G (100%)   | A (17%)    | G (100%)    |
| 71,253,283 | Intron 2 | G | G (100%)   | G (100%)   | A (11%)    | G (100%)    |
| 71,253,291 | Intron 2 | C | C (100%)   | C (100%)   | T (13%)    | C (100%)    |
| 71,253,481 | Intron 2 | A | T (97%)    | T (96%)    | T (98%)    | A (100%)    |
| 71,253,518 | Intron 2 | G | G (98%)    | A (13%)    | A (7%)*    | G (100%)    |
| 71,253,561 | Intron 2 | C | C (100%)   | T (3%)*    | T (12%)    | C (100%)    |
| 71,253,609 | Intron 2 | C | C (100%)   | T (3%)*    | T (13%)    | C (100%)    |
| 71,253,619 | Intron 2 | G | G (100%)   | A (11%)    | G (100%)   | G (100%)    |
| 71,253,709 | Intron 2 | G | G (100%)   | G (100%)   | A (52%)    | G (100%)    |
| 71,253,747 | Intron 2 | C | C (100%)   | T (11%)    | T (10%)*   | C (100%)    |
| 71,253,752 | Intron 2 | G | A (100%)   | A (100%)   | A (100%)   | G (100%)    |
| 71,253,816 | Intron 2 | C | C (100%)   | T (13%)    | C (100%)   | C (100%)    |
| 71,253,817 | Intron 2 | C | C (100%)   | T (12%)    | C (100%)   | C (100%)    |
| 71,253,830 | Intron 2 | G | G (100%)   | A (7%)*    | A (11%)    | G (100%)    |
| 71,253,893 | Intron 2 | G | A (2%)*    | G (100%)   | A (11%)    | G (100%)    |
| 71,253,934 | Intron 2 | C | C (100%)   | T (13%)    | T (3%)*    | C (100%)    |
| 71,253,991 | Intron 2 |   | InsT (80%) | InsT (47%) | InsT (73%) | InsTT (92%) |
| 71,254,001 | Intron 2 | A | T (2%)*    | T (19%)    | A (100%)   | A (97%)     |
| 71,254,078 | Intron 2 | C | C (100%)   | T (11%)    | T (3%)*    | C (100%)    |
| 71,254,160 | Intron 2 | C | T (100%)   | T (100%)   | T (100%)   | C (100%)    |
| 71,254,169 | Intron 2 | C | C (100%)   | T (3%)*    | T (11%)    | C (100%)    |
| 71,254,246 | Intron 2 | G | G (100%)   | A (4%)*    | A (15%)    | G (100%)    |
| 71,254,247 | Intron 2 | G | A (2%)*    | A (13%)    | A (12%)    | G (100%)    |
| 71,254,378 | Intron 2 | C | C (100%)   | T (4%)*    | T (13%)    | C (100%)    |
| 71,254,420 | Intron 2 | T | C (98%)    | C (100%)   | C (96%)    | T (100%)    |
| 71,254,472 | Intron 2 | C | C (100%)   | C (100%)   | T (12%)    | C (100%)    |

|            |          |            |            |            |           |            |                                            |
|------------|----------|------------|------------|------------|-----------|------------|--------------------------------------------|
| 71,254,486 | Intron 2 | C          | C (100%)   | T (13%)    | T (4%)*   | C (100%)   |                                            |
| 71,254,512 | Intron 2 | G          | G (98%)    | G (100%)   | A (14%)   | G (100%)   |                                            |
| 71,254,543 | Intron 2 | G          | G (100%)   | G (93%)    | G (97%)   | T (100%)   |                                            |
| 71,254,578 | Intron 2 | G          | G (100%)   | A (12%)    | G (100%)  | G (100%)   |                                            |
| 71,254,609 | Intron 2 | G          | G (100%)   | A (16%)    | A (4%)*   | G (100%)   |                                            |
| 71,254,610 | Intron 2 | G          | G (100%)   | A (11%)    | G (100%)  | G (97%)    |                                            |
| 71,254,612 | Intron 2 | C          | C (100%)   | C (100%)   | T (13%)   | C (100%)   |                                            |
| 71,254,658 | Intron 2 | G          | G (100%)   | A (14%)    | G (100%)  | G (100%)   |                                            |
| 71,254,797 | Intron 2 | G          | A (2%)*    | A (5%)*    | A (13%)   | G (100%)   |                                            |
| 71,254,910 | Intron 2 | G          | G (100%)   | A (6%)*    | A (13%)   | G (100%)   |                                            |
| 71,254,963 | Intron 2 | C          | C (100%)   | C (100%)   | T (15%)   | T (3%)*    |                                            |
| 71,254,997 | Intron 2 | G          | G (100%)   | G (100%)   | A (16%)   | G (100%)   |                                            |
| 71,255,001 | Intron 2 | G          | A (2%)*    | G (100%)   | A (11%)   | G (100%)   |                                            |
| 71,255,043 | Intron 2 | C          | C (98%)    | T (16%)    | C (100%)  | C (100%)   |                                            |
| 71,255,051 | Intron 2 | C          | T (100%)   | T (100%)   | T (100%)  | C (100%)   |                                            |
| 71,255,071 | Intron 2 | G          | G (100%)   | A (11%)    | A (9%)*   | G (100%)   |                                            |
| 71,255,079 | Intron 2 | C          | C (100%)   | T (5%)*    | T (13%)   | C (100%)   |                                            |
| 71,255,081 | Intron 2 | C          | C (100%)   | T (11%)    | T (9%)*   | C (100%)   |                                            |
| 71,255,093 | Intron 2 | C          | C (100%)   | T (6%)*    | T (11%)   | C (100%)   |                                            |
| 71,255,108 | Intron 2 | C          | C (100%)   | T (13%)    | T (8%)*   | C (100%)   |                                            |
| 71,255,118 | Intron 2 | G          | A (97%)    | A (100%)   | A (90%)   | G (100%)   |                                            |
| 71,255,119 | Intron 2 | C          | C (100%)   | T (15%)    | T (11%)** | C (100%)   |                                            |
| 71,255,211 | Intron 2 | G          | G (100%)   | G (100%)   | A (14%)   | G (100%)   |                                            |
| 71,255,267 | Intron 2 | G          | A (2%)*    | G (97%)    | A (11%)   | G (100%)   |                                            |
| 71,255,322 | Intron 2 | C          | T (2%)*    | T (15%)    | C (100%)  | C (100%)   |                                            |
| 71,255,370 | Intron 2 | A          | T (99%)    | T (100%)   | T (100%)  | A (100%)   |                                            |
| 71,255,427 | Exon 3   | <u>CCG</u> | CCA (6%)*  | CCG (100%) | CCA (11%) | CCG (100%) | CCG→P <sub>12</sub><br>CCA→P <sub>12</sub> |
| 71,255,496 | Exon 3   | <u>GGG</u> | GGG (100%) | GGA (11%)  | GGA (8%)* | GGG (100%) | GGG→G <sub>35</sub><br>GGA→G <sub>35</sub> |
| 71,255,593 | 3' UTR   | G          | A (100%)   | A (100%)   | A (100%)  | G (100%)   |                                            |
| 71,255,614 | 3' UTR   | C          | C (100%)   | C (100%)   | T (19%)   | C (100%)   |                                            |
| 71,255,623 | 3' UTR   | C          | C (100%)   | T (13%)    | T (5%)*   | C (100%)   |                                            |
| 71,255,675 | 3' UTR   | C          | C (100%)   | T (4%)*    | T (16%)   | C (100%)   |                                            |
| 71,255,677 | 3' UTR   | C          | T (2%)*    | C (100%)   | T (15%)   | C (100%)   |                                            |
| 71,255,679 | 3' UTR   | C          | C (100%)   | T (4%)*    | T (16%)   | C (100%)   |                                            |

|            |                   |   |          |          |          |          |
|------------|-------------------|---|----------|----------|----------|----------|
| 71,255,680 | 3' UTR            | C | C (100%) | T (4%)*  | T (11%)  | C (100%) |
| 71,255,719 | 3' UTR            | G | G (100%) | A (12%)  | G (100%) | G (100%) |
| 71,255,739 | 3' UTR            | C | C (100%) | T (5%)*  | T (11%)  | C (100%) |
| 71,255,767 | 3' UTR            | A | G (100%) | G (97%)  | G (100%) | A (100%) |
| 71,255,989 | Downstream region | G | G (100%) | A (13%)  | A (9%)*  | G (100%) |
| 71,256,001 | Downstream region | C | C (100%) | C (100%) | T (13%)  | C (100%) |
| 71,256,002 | Downstream region | C | C (100%) | C (100%) | T (13%)  | C (100%) |
| 71,256,003 | Downstream region | C | C (100%) | T (4%)*  | T (13%)  | C (100%) |
| 71,256,123 | Downstream region | G | A (2%)*  | G (100%) | A (11%)  | G (100%) |
| 71,256,203 | Downstream region | C | C (100%) | T (4%)*  | T (17%)  | C (100%) |
| 71,256,204 | Downstream region | C | C (100%) | T (4%)*  | T (17%)  | C (100%) |
| 71,256,209 | Downstream region | G | G (100%) | G (100%) | A (11%)  | G (100%) |
| 71,256,210 | Downstream region | G | G (100%) | A (10%)* | A (12%)  | G (100%) |
| 71,256,289 | Downstream region | C | C (100%) | T (14%)  | C (100%) | C (100%) |
| 71,256,397 | Downstream region | C | C (100%) | T (11%)  | T (6%)*  | C (100%) |

n.a.: not available; the variant frequency is referred to the percentage of the highlighted base in the sequenced ancient hominine genome, with\* frequency≤10% and \*\* counts<10. In light orange are underlined the variants fixed at 100% in modern human compared to ancient hominines.
