# Supplementary material for: A Catalog of Coding Sequence Variations in Salivary Proteins’ Genes Occurring during Recent Human Evolution
Source: MDPI journal article supplement (doi:10.3390/ijms241915010), 2023-10-09
Supplement: s1 [file s1]

Table S4. Nucleotide Substitutions in *PRB4* gene in introns and regulatory regions

| Genomic Coordinates (hg19) | Gene Region      | Modern human | Altai Neanderthal (Variant Frequency) | Chagyrskaya Neanderthal (Variant Frequency) | Vindija Neanderthal (Variant Frequency) | Denisovan (Variant Frequency) | Codon → amino acid                                   |
|----------------------------|------------------|--------------|---------------------------------------|---------------------------------------------|-----------------------------------------|-------------------------------|------------------------------------------------------|
| 11,463,890                 | Upstream regions | C            | C (100%)                              | T (13%)                                     | T (9%)*                                 | C (100%)                      |                                                      |
| 11,463,868                 | Upstream regions | G            | T (100%)                              | T (100%)                                    | T (100%)                                | T (100%)                      |                                                      |
| 11,463,814                 | Upstream regions | A            | T (97%)                               | T (100%)                                    | T (100%)                                | T (100%)                      |                                                      |
| 11,463,813                 | Upstream regions | G            | A (100%)                              | A (100%)                                    | A (100%)                                | A (97%)                       |                                                      |
| 11,463,806                 | Upstream regions | G            | G (100%)                              | G (100%)                                    | A (13%)                                 | G (100%)                      |                                                      |
| 11,463,780                 | Upstream regions | G            | G (100%)                              | A (4%)*                                     | A (13%)                                 | G (100%)                      |                                                      |
| 11,463,693                 | Upstream regions | C            | C (100%)                              | T (3%)*                                     | T (13%)                                 | C (100%)                      |                                                      |
| 11,463,675                 | Upstream regions | C            | T (3%)*                               | C (100%)                                    | T (11%)                                 | C (100%)                      |                                                      |
| 11,463,623                 | Upstream regions | G            | G (100%)                              | A (4%)*                                     | A (11%)                                 | G (100%)                      |                                                      |
| 11,463,613                 | Upstream regions | T            | T (100%)                              | T (100%)                                    | T (100%)                                | A (100%)                      |                                                      |
| 11,463,513                 | Upstream regions | T            | T (100%)                              | T (100%)                                    | T (100%)                                | C (56%)                       |                                                      |
| 11,463,491                 | Upstream regions | C            | C (100%)                              | T (5%)*                                     | T (11%)                                 | C (100%)                      |                                                      |
| 11,463,480                 | Upstream regions | G            | T (3%)*                               | T (4%)*                                     | T (11%)<br>A (11%)                      | T (4%)*                       |                                                      |
| 11,463,443                 | Upstream regions | C            | C (100%)                              | C (100%)                                    | T (11%)                                 | C (100%)                      |                                                      |
| 11,463,391                 | Upstream regions | C            | C (100%)                              | T (13%)                                     | C (100%)                                | C (100%)                      |                                                      |
| 11,463,375                 | Upstream regions | G            | G (100%)                              | G (100%)                                    | A (21%)                                 | A (5%)*                       |                                                      |
| 11,463,335                 | 5'UTR            | C            | T (100%)                              | T (100%)                                    | T (100%)                                | T (100%)                      |                                                      |
| 11,463,302                 | Exon 1 (Signal)  | <u>G</u> AC  | <u>G</u> AC (100%)                    | <u>A</u> AC (13%)                           | <u>A</u> AC (6%)*                       | <u>G</u> AC (100%)            | CUG→L <sub>10</sub> (sp)<br>UUG→L <sub>10</sub> (sp) |
| 11,463,193                 | Intron 1         | C            | C (100%)                              | T (4%)*                                     | T (12%)                                 | C (100%)                      |                                                      |
| 11,463,190                 | Intron 1         | C            | C (100%)                              | C (100%)                                    | T (11%)                                 | C (100%)                      |                                                      |
| 11,463,130                 | Intron 1         | G            | G (100%)                              | A (24%)                                     | A (8%)*                                 | G (100%)                      |                                                      |
| 11,463,113                 | Intron 1         | C            | C (100%)                              | C (100%)                                    | T (13%)                                 | T (2%)*                       |                                                      |
| 11,463,051                 | Intron 1         | T            | A (100%)                              | T (100%)                                    | T (100%)                                | T (100%)                      |                                                      |
| 11,463,030                 | Intron 1         | C            | C (100%)                              | C (100%)                                    | T (11%)                                 | C (97%)                       |                                                      |
| 11,463,028                 | Intron 1         | C            | C (100%)                              | C (100%)                                    | T (16%)                                 | C (100%)                      |                                                      |
| 11,463,000                 | Intron 1         | C            | C (100%)                              | C (100%)                                    | T (11%)                                 | C (100%)                      |                                                      |
| 11,462,979                 | Intron 1         | C            | A (98%)                               | A (96%)                                     | A (96%)                                 | A (100%)                      |                                                      |
| 11,462,919                 | Intron 1         | G            | G (100%)                              | G (100%)                                    | A (11%)                                 | G (100%)                      |                                                      |
| 11,462,900                 | Intron 1         | C            | C (100%)                              | T (9%)*                                     | T (11%)                                 | C (100%)                      |                                                      |

|            |                 |            |                   |                  |                   |                   |                                              |
|------------|-----------------|------------|-------------------|------------------|-------------------|-------------------|----------------------------------------------|
| 11,462,894 | Intron 1        | C          | C (98%)           | C (100%)         | T (11%)           | C (100%)          |                                              |
| 11,462,827 | Intron 1        | G          | G (98%)           | G (100%)         | A (20%)           | G (100%)          |                                              |
| 11,462,558 | Intron 1        | C          | C (100%)          | T (14%)          | C (100%)          | C (100%)          |                                              |
| 11,462,521 | Intron 1        | C          | C (100%)          | C (100%)         | T (21%)           | C (100%)          |                                              |
| 11,462,507 | Intron 1        | G          | G (100%)          | A (16%)          | A (7%)*           | G (100%)          |                                              |
| 11,462,505 | Intron 1        | G          | G (100%)          | A (11%)          | G (100%)          | G (100%)          |                                              |
| 11,462,504 | Intron 1        | G          | G (100%)          | A (15%)          | G (94%)           | G (100%)          |                                              |
| 11,462,487 | Intron 1        | G          | G (100%)          | A (14%)          | A (7%)*           | G (100%)          |                                              |
| 11,462,486 | Intron 1        | G          | G (100%)          | A (14%)          | A (6%)*           | G (100%)          |                                              |
| 11,462,477 | Intron 1        | G          | G (100%)          | A (12%)          | G (100%)          | G (100%)          |                                              |
| 11,462,432 | Intron 1        | C          | C (100%)          | T (4%)*          | T (11%)           | C (100%)          |                                              |
| 11,462,430 | Intron 1        | C          | C (100%)          | T (3%)*          | T (12%)           | C (100%)          |                                              |
| 11,462,392 | Intron 1        | C          | T (2%)*           | C (100%)         | T (11%)           | C (100%)          |                                              |
| 11,462,317 | Exon 2<br>(PGA) | <u>GAG</u> | <u>GAG</u> (100%) | <u>GAA</u> (17%) | <u>GAG</u> (100%) | <u>GAT</u> (4%)*  | CUC→L <sub>13</sub><br>CUU→L <sub>13</sub>   |
| 11,462,269 | Intron 2        | G          | G (100%)          | A (14%)          | A (4%)*           | G (100%)          |                                              |
| 11,462,185 | Intron 2        | G          | G (100%)          | A (11%)          | G (100%)          | G (100%)          |                                              |
| 11,462,175 | Intron 2        | A          | A (99%)           | A (100%)         | A (100%)          | G (100%)          |                                              |
| 11,462,142 | Intron 2        | G          | G (98%)           | G (100%)         | A (15%)           | G (100%)          |                                              |
| 11,462,082 | Intron 2        | C          | C (100%)          | C (100%)         | T (19%)           | C (100%)          |                                              |
| 11,462,081 | Intron 2        | C          | C (100%)          | C (100%)         | T (27%)           | C (100%)          |                                              |
| 11,462,076 | Intron 2        | G          | G (100%)          | A (13%)          | G (100%)          | G (100%)          |                                              |
| 11,462,027 | Intron 2        | C          | C (100%)          | T (14%)          | C (100%)          | C (100%)          |                                              |
| 11,462,002 | Intron 2        | C          | A (93%)           | A (95%)          | A (80%)           | A (95%)           |                                              |
| 11,461,980 | Intron 2        | G          | A (2%)*           | A (13%)          | A (3%)*           | G (100%)          |                                              |
| 11,461,978 | Intron 2        | G          | G (100%)          | A (12%)          | A (13%)           | G (100%)          |                                              |
| 11,461,860 | Intron 2        | A          | G (14%)           | G (13%)          | G (15%)           | G (33%)           |                                              |
| 11,461,836 | Intron 2        | T          | C (100%)          | C (100%)         | C (100%)          | C (100%)          |                                              |
| 11,461,470 | Exon 3<br>(PGA) | <u>CCA</u> | <u>CCT</u> (5%)*  | <u>CCT</u> (15%) | <u>CCT</u> (17%)  | <u>CCG</u> (11%)  | GGU→G <sub>133</sub><br>GGA→G <sub>133</sub> |
| 11,461,452 | Exon 3<br>(PGA) | <u>GGG</u> | <u>GGG</u> (100%) | <u>GGA</u> (11%) | <u>GGA</u> (4%)*  | <u>GGG</u> (100%) | CCC→P <sub>139</sub><br>CCU→P <sub>139</sub> |
| 11,461,155 | 3'UTR           | C          | C (100%)          | T (16%)          | C (100%)          | C (100%)          |                                              |
| 11,461,009 | Intron 4        | C          | C (100%)          | T (4%)*          | T (21%)           | C (100%)          |                                              |
| 11,461,004 | Intron 4        | C          | C (100%)          | T (6%)*          | T (11%)           | C (100%)          |                                              |
| 11,461,002 | Intron 4        | C          | C (100%)          | C (96%)          | T (16%)           | C (100%)          |                                              |
| 11,460,987 | Intron 4        | T          | T (100%)          | A (35%)          | T (100%)          | T (100%)          |                                              |

|            |                    |   |          |          |          |          |
|------------|--------------------|---|----------|----------|----------|----------|
| 11,460,919 | Intron 4           | C | C (100%) | T (14%)  | C (100%) | C (100%) |
| 11,460,891 | Intron 4           | G | G (100%) | G (100%) | T (11%)  | G (100%) |
| 11,460,868 | Intron 4           | G | G (100%) | A (4%)*  | A (14%)  | G (100%) |
| 11,460,860 | Intron 4           | C | C (100%) | C (100%) | T (12%)  | C (100%) |
| 11,460,821 | Intron 4           | G | G (99%)  | A (13%)  | A (6%)*  | G (100%) |
| 11,460,819 | Intron 4           | G | A (3%)*  | A (8%)*  | A (11%)  | G (100%) |
| 11,460,683 | Intron 4           | G | G (100%) | A (19%)  | G (100%) | G (100%) |
| 11,460,647 | Intron 4           | C | C (100%) | T (15%)  | T (13%)  | C (100%) |
| 11,460,636 | Intron 4           | G | G (98%)  | A (13%)  | A (6%)*  | G (100%) |
| 11,460,532 | Intron 4           | G | G (100%) | A (8%)*  | A (22%)  | G (100%) |
| 11,460,531 | Intron 4           | G | G (100%) | G (100%) | A (13%)  | G (100%) |
| 11,460,498 | Intron 4           | C | C (99%)  | T (15%)  | T (12%)  | C (100%) |
| 11,460,445 | Intron 4           | C | C (100%) | T (5%)*  | T (13%)  | C (100%) |
| 11,460,394 | Intron 4           | G | G (100%) | A (11%)  | A (10%)* | G (100%) |
| 11,460,245 | Intron 4           | C | C (100%) | T (14%)  | C (100%) | C (100%) |
| 11,460,244 | Intron 4           | G | G (98%)  | A (5%)*  | A (13%)  | G (100%) |
| 11,460,231 | Intron 4           | C | T (98%)  | T (100%) | T (100%) | T (100%) |
| 11,460,224 | Intron 4           | G | A (11%)  | G (98%)  | G (100%) | G (100%) |
| 11,460,070 | 3'UTR              | C | C (98%)  | C (100%) | T (13%)  | C (100%) |
| 11,460,054 | 3'UTR              | C | C (100%) | T (9%)*  | T (17%)  | C (100%) |
| 11,459,932 | Downstream regions | G | G (100%) | A (14%)  | A (5%)*  | G (100%) |
| 11,459,865 | Downstream regions | T | C (99%)  | C (97%)  | C (93%)  | C (100%) |
| 11,459,793 | Downstream regions | G | A (2%)*  | A (5%)*  | A (11%)  | G (100%) |
| 11,459,750 | Downstream regions | G | G (98%)  | A (12%)  | G (100%) | G (100%) |
| 11,459,722 | Downstream regions | G | G (100%) | G (100%) | A (11%)  | A (4%)*  |
| 11,459,713 | Downstream regions | G | G (100%) | A (21%)  | A (6%)*  | G (100%) |
| 11,459,706 | Downstream regions | G | G (100%) | A (4%)*  | A (11%)  | G (100%) |
| 11,459,689 | Downstream regions | C | C (100%) | T (9%)*  | T (18%)  | C (97%)  |
| 11,459,685 | Downstream regions | G | G (98%)  | G (100%) | A (14%)  | G (100%) |
| 11,459,684 | Downstream regions | G | G (100%) | A (3%)*  | A (14%)  | G (100%) |
| 11,459,683 | Downstream regions | G | A (2%)*  | G (100%) | A (13%)  | G (100%) |
| 11,459,645 | Downstream regions | C | C (100%) | C (100%) | T (11%)  | C (100%) |
| 11,459,633 | Downstream regions | G | G (100%) | A (11%)  | A (5%)*  | G (100%) |

|                   |                    |          |                 |                 |                 |                 |
|-------------------|--------------------|----------|-----------------|-----------------|-----------------|-----------------|
| <b>11,459,625</b> | Downstream regions | <b>C</b> | <b>C (100%)</b> | <b>C (100%)</b> | <b>T (12%)</b>  | <b>C (100%)</b> |
| <b>11,459,615</b> | Downstream regions | <b>C</b> | <b>C (100%)</b> | <b>C (100%)</b> | <b>T (14%)</b>  | <b>C (100%)</b> |
| <b>11,459,596</b> | Downstream regions | <b>C</b> | <b>C (100%)</b> | <b>C (100%)</b> | <b>T (11%)</b>  | <b>C (100%)</b> |
| <b>11,459,588</b> | Downstream regions | <b>C</b> | <b>G (18%)</b>  | <b>C (100%)</b> | <b>C (100%)</b> | <b>G (5%)*</b>  |
| <b>11,459,568</b> | Downstream regions | <b>C</b> | <b>A (25%)</b>  | <b>C (100%)</b> | <b>A (4%)*</b>  | <b>A (6%)*</b>  |
| <b>11,459,566</b> | Downstream regions | <b>C</b> | <b>C (100%)</b> | <b>C (100%)</b> | <b>T (11%)</b>  | <b>C (100%)</b> |
| <b>11,459,565</b> | Downstream regions | <b>A</b> | <b>G (20%)</b>  | <b>A (100%)</b> | <b>A (3%)*</b>  | <b>A (100%)</b> |
| <b>11,459,556</b> | Downstream regions | <b>G</b> | <b>G (100%)</b> | <b>A (38%)</b>  | <b>A (7%)*</b>  | <b>G (100%)</b> |
| <b>11,459,551</b> | Downstream regions | <b>T</b> | <b>G (22%)</b>  | <b>G (6%)*</b>  | <b>T (100%)</b> | <b>G (3%)*</b>  |
| <b>11,459,531</b> | Downstream regions | <b>G</b> | <b>G (100%)</b> | <b>G (100%)</b> | <b>A (13%)</b>  | <b>G (97%)</b>  |

n.a.: not available; the variant frequency is referred to the percentage of the highlighted base in the sequenced ancient hominine genome, with\* frequency≤10%. In light orange are underlined the variants fixed at 100% in modern human compared to ancient hominines.
