# Supplementary material for: A Catalog of Coding Sequence Variations in Salivary Proteins’ Genes Occurring during Recent Human Evolution
Source: MDPI journal article supplement (doi:10.3390/ijms241915010), 2023-10-09
Supplement: s1 [file s1]

Table S5. Nucleotide Substitutions in *PRH2* gene in introns and regulatory regions

| Genomic Coordinates (hg19) | Gene Region      | Modern human | Altai Neanderthal (Variant Frequency) | Chagyrskaya Neanderthal (Variant Frequency) | Vindija Neanderthal (Variant Frequency) | Denisovan (Variant Frequency) | Codon → amino acid |
|----------------------------|------------------|--------------|---------------------------------------|---------------------------------------------|-----------------------------------------|-------------------------------|--------------------|
| 11,081,651                 | Upstream regions | C            | C (100%)                              | C (100%)                                    | T (16%)                                 | C (100%)                      |                    |
| 11,081,653                 | Upstream regions | C            | C (100%)                              | T (4%)*                                     | T (15%)                                 | C (100%)                      |                    |
| 11,081,672                 | Upstream regions | C            | A (4%)*                               | T (11%)                                     | C (100%)                                | C (100%)                      |                    |
| 11,081,681                 | Upstream regions | C            | C (100%)                              | T (15%)                                     | C (100%)                                | C (100%)                      |                    |
| 11,081,759                 | Upstream regions | G            | G (100%)                              | A (15%)                                     | A (13%)*                                | G (100%)                      |                    |
| 11,081,788                 | Upstream regions | G            | A (4%)*                               | A (100%)                                    | G (100%)                                | G (100%)                      |                    |
| 11,081,803                 | Upstream regions | G            | G (100%)                              | G (100%)                                    | A (17%)                                 | G (96%)                       |                    |
| 11,081,840                 | 5'UTR            | A            | G (98%)                               | A (100%)                                    | A (100%)                                | A (100%)                      |                    |
| 11,081,842                 | 5'UTR            | A            | A (100%)                              | A (100%)                                    | A (100%)                                | T (100%)                      |                    |
| 11,081,856                 | 5'UTR            | C            | C (100%)                              | C (100%)                                    | T (13%)                                 | C (100%)                      |                    |
| 11,081,997                 | Intron 1         | G            | G (100%)                              | A (4%)*                                     | A (11%)                                 | G (100%)                      |                    |
| 11,082,013                 | Intron 1         | G            | G (100%)                              | A (14%)                                     | G (100%)                                | G (100%)                      |                    |
| 11,082,167                 | Intron 1         | G            | G (100%)                              | A (11%)                                     | A (6%)*                                 | G (100%)                      |                    |
| 11,082,201                 | Intron 1         | G            | G (100%)                              | A (3%)*                                     | A (11%)                                 | G (100%)                      |                    |
| 11,082,210                 | Intron 1         | A            | A (100%)                              | G (89%)                                     | G (100%)                                | A (100%)                      |                    |
| 11,082,254                 | Intron 1         | C            | C (100%)                              | A (100%)                                    | A (100%)                                | C (100%)                      |                    |
| 11,082,310                 | Intron 1         | T            | T (100%)                              | C (100%)                                    | C (97%)                                 | T (100%)                      |                    |
| 11,082,355                 | Intron 1         | G            | G (97%)                               | A (15%)                                     | A (3%)*                                 | G (100%)                      |                    |
| 11,082,462                 | Intron 1         | C            | T (100%)                              | T (4%)*                                     | T (7%)*                                 | T (3%)*                       |                    |
| 11,082,479                 | Intron 1         | G            | G (100%)                              | G (100%)                                    | A (14%)                                 | G (100%)                      |                    |
| 11,082,514                 | Intron 1         | G            | A (3%)*                               | G (100%)                                    | A (11%)                                 | G (100%)                      |                    |
| 11,082,598                 | Intron 1         | C            | C (100%)                              | T (12%)                                     | T (10%)*                                | C (100%)                      |                    |
| 11,082,599                 | Intron 1         | C            | C (100%)                              | T (16%)                                     | C (97%)                                 | C (100%)                      |                    |
| 11,082,615                 | Intron 1         | A            | A (100%)                              | A (100%)                                    | A (100%)                                | G (97%)                       |                    |
| 11,082,650                 | Intron 1         | G            | G (100%)                              | A (11%)                                     | A (3%)*                                 | G (100%)                      |                    |
| 11,082,651                 | Intron 1         | G            | G (100%)                              | A (11%)                                     | G (100%)                                | G (100%)                      |                    |
| 11,082,652                 | Intron 1         | C            | C (100%)                              | T (3%)*                                     | T (22%)                                 | C (100%)                      |                    |
| 11,082,653                 | Intron 1         | C            | C (100%)                              | T (6%)*                                     | T (11%)                                 | C (100%)                      |                    |
| 11,082,654                 | Intron 1         | C            | C (100%)                              | T (3%)*                                     | T (12%)                                 | C (100%)                      |                    |
| 11,082,661                 | Intron 1         | G            | G (100%)                              | A (3%)*                                     | A (13%)                                 | G (100%)                      |                    |

|            |                   |     |            |            |            |            |                                              |
|------------|-------------------|-----|------------|------------|------------|------------|----------------------------------------------|
| 11,082,689 | Intron 1          | G   | G (100%)   | G (100%)   | A (16%)    | G (100%)   |                                              |
| 11,082,705 | Intron 1          | C   | C (100%)   | T (12%)    | T (4%)*    | C (100%)   |                                              |
| 11,082,740 | Intron 1          | G   | A (2%)*    | A (3%)*    | A (16%)    | G (100%)   |                                              |
| 11,082,774 | Intron 1          | G   | G (100%)   | G (94%)    | A (11%)    | G (100%)   |                                              |
| 11,082,775 | Intron 1          | G   | G (100%)   | A (7%)*    | A (16%)    | G (100%)   |                                              |
| 11,082,787 | Intron 1          | G   | G (100%)   | G (100%)   | A (17%)    | G (100%)   |                                              |
| 11,082,831 | Intron 1          | C   | C (100%)   | A (100%)   | A (100%)   | C (100%)   |                                              |
| 11,082,869 | Exon 2<br>(PRP-1) | GAT | GAC (100%) | GAT (100%) | GAT (100%) | GAT (100%) | GAU→D <sub>6</sub><br>GAC→D <sub>6</sub>     |
| 11,082,884 | Exon 2<br>(PRP-1) | GAC | GAC (100%) | GAT (11%)  | GAT (8%)*  | GAC (100%) | GAC→D <sub>11</sub><br>GAU→D <sub>11</sub>   |
| 11,082,932 | Intron 2          | C   | C (100%)   | T (3%)*    | T (11%)    | C (100%)   |                                              |
| 11,082,971 | Intron 2          | G   | G (100%)   | A (11%)    | A (3%)*    | G (100%)   |                                              |
| 11,083,014 | Intron 2          | C   | C (97%)    | T (14%)    | C (100%)   | C (100%)   |                                              |
| 11,083,015 | Intron 2          | C   | C (100%)   | T (14%)    | C (100%)   | C (97%)    |                                              |
| 11,083,054 | Intron 2          | G   | G (100%)   | G (100%)   | A (13%)    | G (100%)   |                                              |
| 11,083,088 | Intron 2          | C   | C (100%)   | T (6%)*    | T (12%)    | C (100%)   |                                              |
| 11,083,089 | Intron 2          | C   | C (98%)    | C (100%)   | T (11%)    | C (100%)   |                                              |
| 11,083,090 | Intron 2          | C   | C (100%)   | C (100%)   | T (13%)    | C (100%)   |                                              |
| 11,083,134 | Intron 2          | G   | G (100%)   | T (93%)    | T (83%)    | C (79%)    |                                              |
| 11,083,177 | Intron 2          | C   | C (100%)   | T (6%)*    | T (13%)    | C (100%)   |                                              |
| 11,083,180 | Intron 2          | C   | C (100%)   | C (100%)   | T (12%)    | C (100%)   |                                              |
| 11,083,313 | Exon 3<br>(PRP-1) | TTG | TTG (98%)  | TTA (12%)  | TTA (5%)*  | TTG (94%)  | UUG→L <sub>35</sub><br>UUA→L <sub>35</sub>   |
| 11,083,445 | Exon 3<br>(PRP-1) | CCC | CCC (100%) | CCT (11%)  | CCC (100%) | CCC (100%) | CCC→P <sub>79</sub><br>CCU→P <sub>79</sub>   |
| 11,083,502 | Exon 3<br>(PRP-1) | CAG | CAG (98%)  | CAG (100%) | CAA (20%)  | CAG (100%) | CAG→Q <sub>98</sub><br>CAA→Q <sub>98</sub>   |
| 11,083,613 | Exon 3<br>(PRP-1) | CCC | CCC (100%) | CCC (100%) | CCC (100%) | CCT (60%)  | CCC→P <sub>135</sub><br>CCU→P <sub>135</sub> |
| 11,083,622 | Exon 3<br>(PRP-1) | GGC | GGC (100%) | GGC (100%) | GGT (11%)  | GGC (100%) | GGC→G <sub>138</sub><br>GGU→G <sub>138</sub> |
| 11,083,671 | 3'UTR             | C   | C (100%)   | C (100%)   | T (12%)    | C (100%)   |                                              |
| 11,083,677 | 3'UTR             | T   | C (100%)   | C (100%)   | C (85%)    | C (93%)    |                                              |
| 11,083,679 | 3'UTR             | G   | G (100%)   | G (100%)   | A (12%)    | G (100%)   |                                              |
| 11,083,689 | Intron 3          | C   | C (100%)   | T (14%)    | T (4%)*    | C (100%)   |                                              |
| 11,083,700 | Intron 3          | C   | C (100%)   | C (100%)   | T (3%)*    | T (86%)    |                                              |
| 11,083,709 | Intron 3          | G   | G (98%)    | A (13%)    | A (3%)*    | G (100%)   |                                              |
| 11,083,819 | Intron 3          | T   | T (100%)   | T (100%)   | T (100%)   | C (39%)    |                                              |
| 11,083,828 | Intron 3          | G   | G (100%)   | A (11%)    | A (5%)*    | G (100%)   |                                              |
| 11,083,870 | Intron 3          | C   | C (100%)   | C (100%)   | T (12%)    | C (100%)   |                                              |

|            |          |   |                          |            |                          |            |
|------------|----------|---|--------------------------|------------|--------------------------|------------|
| 11,083,899 | Intron 3 | C | C (100%)                 | T (4%)*    | T (13%)                  | C (100%)   |
| 11,083,900 | Intron 3 | C | C (100%)                 | T (3%)*    | T (13%)                  | C (100%)   |
| 11,083,951 | Intron 3 | G | G (100%)                 | A (13%)    | G (100%)                 | G (100%)   |
| 11,083,962 | Intron 3 | C | C (100%)                 | C (100%)   | T (12%)                  | C (100%)   |
| 11,083,967 | Intron 3 | C | C (100%)                 | T (5%)*    | T (11%)                  | C (100%)   |
| 11,084,096 | Intron 3 | C | C (98%)                  | T (13%)    | T (4%)*                  | C (100%)   |
| 11,084,126 | Intron 3 | C | C (100%)                 | T (12%)    | C (100%)                 | C (100%)   |
| 11,084,167 | Intron 3 | C | C (100%)                 | T (11%)    | C (100%)                 | C (100%)   |
| 11,084,228 | Intron 3 | C | C (100%)                 | T (13%)    | T (6%)*                  | C (100%)   |
| 11,084,229 | Intron 3 | C | C (100%)                 | T (13%)    | T (5%)*                  | C (100%)   |
| 11,084,419 | Intron 3 | T | InsT (2%)*<br>delT (7%)* | InsT (16%) | InsT (8%)*<br>delT (6%)* | delT (14%) |
| 11,084,464 | Intron 3 | A | G (96%)                  | G (96%)    | G (98%)                  | G (100%)   |
| 11,084,646 | Intron 3 | C | C (100%)                 | C (100%)   | T (16%)                  | C (100%)   |
| 11,084,671 | Intron 3 | G | G (100%)                 | A (3%)*    | A (3%)*                  | G (100%)   |
| 11,084,698 | Intron 3 | G | G (100%)                 | A (7%)*    | A (11%)                  | G (100%)   |
| 11,084,701 | Intron 3 | G | G (100%)                 | A (3%)*    | A (18%)                  | G (100%)   |
| 11,084,702 | Intron 3 | G | G (100%)                 | G (100%)   | A (13%)                  | G (100%)   |
| 11,084,711 | Intron 3 | G | A (2%)*                  | A (13%)    | G (100%)                 | G (100%)   |
| 11,084,750 | Intron 3 | C | C (98%)                  | C (95%)    | A (17%)                  | C (97%)    |
| 11,084,798 | Intron 3 | G | G (100%)                 | G (100%)   | A (13%)                  | G (100%)   |
| 11,084,799 | Intron 3 | C | C (100%)                 | T (4%)*    | T (13%)                  | C (100%)   |
| 11,084,807 | Intron 3 | C | C (100%)                 | T (11%)    | C (100%)                 | C (100%)   |
| 11,084,825 | 3'UTR    | G | G (100%)                 | A (4%)*    | A (11%)                  | G (100%)   |
| 11,084,960 | 3'UTR    | G | G (100%)                 | G (100%)   | A (13%)                  | G (100%)   |
| 11,084,999 | 3'UTR    | G | G (100%)                 | A (3%)*    | A (14%)                  | G (100%)   |
| 11,085,183 | 3'UTR    | G | G (100%)                 | A (100%)   | G (100%)                 | G (100%)   |
| 11,085,272 | 3'UTR    | C | C (100%)                 | C (100%)   | T (11%)                  | C (100%)   |
| 11,085,302 | 3'UTR    | C | T (2%)*                  | C (100%)   | T (13%)                  | C (100%)   |
| 11,085,303 | 3'UTR    | C | T (2%)*                  | C (100%)   | T (13%)                  | C (100%)   |
| 11,085,331 | 3'UTR    | G | G (100%)                 | G (100%)   | A (11%)                  | G (97%)    |
| 11,085,392 | 3'UTR    | C | C (100%)                 | T (7%)*    | T (11%)                  | C (100%)   |
| 11,085,499 | 3'UTR    | G | G (100%)                 | G (97%)    | A (15%)                  | G (100%)   |
| 11,085,555 | 3'UTR    | C | C (98%)                  | T (3%)*    | T (17%)                  | C (100%)   |
| 11,085,557 | 3'UTR    | C | T (100%)                 | T (2%)*    | T (13%)                  | T (100%)   |

|            |       |   |            |                       |                    |            |
|------------|-------|---|------------|-----------------------|--------------------|------------|
| 11,085,704 | 3'UTR | G | G (100%)   | A (17%)               | A (6%)*            | G (97%)    |
| 11,085,705 | 3'UTR | G | G (100%)   | A (13%)               | G (100%)           | G (100%)   |
| 11,085,739 | 3'UTR | T | T (100%)   | C (100%)              | C (100%)           | T (100%)   |
| 11,085,747 | 3'UTR | G | A (1%)*    | G (100%)              | A (13%)            | G (100%)   |
| 11,085,925 | 3'UTR | C | T (100%)   | T (6%)*               | T (13%)            | T (100%)   |
| 11,085,964 | 3'UTR | C | T (100%)   | T (3%)*               | T (13%)            | T (100%)   |
| 11,086,132 | 3'UTR | G | A (2%)*    | A (13%)               | A (3%)*            | G (100%)   |
| 11,086,145 | 3'UTR | C | T (100%)   | T (97%)               | T (97%)            | T (100%)   |
| 11,086,323 | 3'UTR | G | A (3%)*    | G (100%)              | A (14%)            | G (100%)   |
| 11,086,491 | 3'UTR | G | G (100%)   | G (100%)              | A (13%)            | G (100%)   |
| 11,086,570 | 3'UTR | G | G (100%)   | C (100%)              | C (100%)           | G (100%)   |
| 11,086,646 | 3'UTR | C | C (100%)   | T (3%)*               | T (11%)            | T (3%)*    |
| 11,086,828 | 3'UTR | C | C (100%)   | T (14%)               | T (4%)*            | C (100%)   |
| 11,086,844 | 3'UTR | C | C (100%)   | T (11%)               | C (100%)           | C (100%)   |
| 11,086,849 | 3'UTR | C | C (100%)   | T (11%)               | T (3%)*            | T (5%)*    |
| 11,086,882 | 3'UTR | C | C (100%)   | T (11%)               | T (5%)*            | C (100%)   |
| 11,086,908 | 3'UTR | C | C (100%)   | T (16%)               | T (8%)*            | C (100%)   |
| 11,086,910 | 3'UTR | C | C (100%)   | T (4%)*               | T (11%)            | C (100%)   |
| 11,086,966 | 3'UTR | G | G (100%)   | G (100%)              | A (13%)            | G (100%)   |
| 11,086,987 | 3'UTR | C | G (100%)   | T (4%)*               | C (100%)           | C (100%)   |
| 11,087,001 | 3'UTR | C | C (100%)   | T (12%)               | T (12%)            | C (100%)   |
| 11,087,003 | 3'UTR | C | C (100%)   | C (100%)              | T (11%)            | C (100%)   |
| 11,087,039 | 3'UTR | C | C (100%)   | T (13%)               | T (3%)*            | C (100%)   |
| 11,087,080 | 3'UTR | G | G (100%)   | A (15%)               | A (8%)*            | G (100%)   |
| 11,087,107 | 3'UTR | G | G (100%)   | G (100%)              | A (13%)            | G (100%)   |
| 11,087,118 | 3'UTR | G | T (3%)*    | A (11%)               | A (7%)*            | G (100%)   |
| 11,087,172 | 3'UTR | C | A (2%)*    | T (16%)               | C (100%)           | A (3%)*    |
| 11,087,173 | 3'UTR | C | T (100%)   | T (11%)               | T (16%)            | T (100%)   |
| 11,087,199 | 3'UTR | G | G (100%)   | G (100%)              | A (13%)            | G (100%)   |
| 11,087,215 | 3'UTR | C | C (99%)    | T (11%)               | C (100%)           | C (100%)   |
| 11,087,216 | 3'UTR | C | C (100%)   | T (17%)               | T (5%)*            | C (97%)    |
| 11,087,220 | 3'UTR | A | delA (91%) | T (29%)<br>delA (45%) | delA (82%)         | delA (82%) |
| 11,087,260 | 3'UTR | T | T (100%)   | C (100%)              | C (100%)           | T (100%)   |
| 11,087,348 | 3'UTR | G | G (100%)   | C (100%)              | C (88%)<br>T (12%) | G (100%)   |

|            |                    |   |          |          |          |          |
|------------|--------------------|---|----------|----------|----------|----------|
| 11,087,467 | Downstream regions | C | C (100%) | T (3%)*  | T (11%)  | C (100%) |
| 11,087,570 | Downstream regions | G | G (100%) | A (14%)  | G (100%) | G (100%) |
| 11,087,615 | Downstream regions | G | G (100%) | A (12%)  | G (100%) | G (100%) |
| 11,087,625 | Downstream regions | G | G (100%) | A (13%)  | A (8%)*  | G (100%) |
| 11,087,626 | Downstream regions | G | G (98%)  | A (12%)  | A (7%)*  | G (100%) |
| 11,087,765 | Downstream regions | C | T (2%)*  | C (100%) | T (11%)  | C (100%) |
| 11,087,766 | Downstream regions | G | A (2%)*  | G (100%) | A (11%)  | G (100%) |
| 11,087,811 | Downstream regions | G | G (100%) | A (12%)  | G (100%) | G (100%) |

n.a.: not available; the variant frequency is referred to the percentage of the highlighted base in the sequenced ancient hominine genome, with\* frequency≤10% and \*\* counts<10. In light orange are underlined the variants fixed at 100% in modern human compared to ancient hominines.
