# Supplementary material for: A Catalog of Coding Sequence Variations in Salivary Proteins’ Genes Occurring during Recent Human Evolution
Source: MDPI journal article supplement (doi:10.3390/ijms241915010), 2023-10-09
Supplement: s1 [file s1]

Table S7. Nucleotide Substitutions in *HTN3* gene in introns and regulatory regions

| Genomic Coordinates (hg19) | Gene Region      | Modern human | Altai Neanderthal (Variant Frequency) | Chagyrskaya Neanderthal (Variant Frequency) | Vindija Neanderthal (Variant Frequency) | Denisovan (Variant Frequency) | Codon → amino acid |
|----------------------------|------------------|--------------|---------------------------------------|---------------------------------------------|-----------------------------------------|-------------------------------|--------------------|
| 70,893,747                 | Upstream regions | C            | C (100%)                              | T (4%)*                                     | T (13%)                                 | C (100%)                      |                    |
| 70,893,792                 | Upstream regions | C            | C (100%)                              | C (100%)                                    | T (12%)                                 | T (3%)*                       |                    |
| 70,893,878                 | Upstream regions | C            | C (100%)                              | T (12%)                                     | T (2%)*                                 | C (100%)                      |                    |
| 70,893,946                 | Upstream regions | A            | A (100%)                              | A (100%)                                    | G (27%)                                 | A (100%)                      |                    |
| 70,893,955                 | Upstream regions | G            | G (100%)                              | G (100%)                                    | A (19%)                                 | G (100%)                      |                    |
| 70,893,964                 | Upstream regions | C            | C (98%)                               | C (100%)                                    | T (17%)                                 | C (100%)                      |                    |
| 70,893,976                 | Upstream regions | C            | C (100%)                              | C (100%)                                    | T (17%)                                 | C (100%)                      |                    |
| 70,894,056                 | Upstream regions | C            | C (100%)                              | T (13%)                                     | C (100%)                                | C (100%)                      |                    |
| 70,894,081                 | Upstream regions | A            | C (100%)                              | C (93%)                                     | C (100%)                                | A (100%)                      |                    |
| 70,894,130                 | 5'UTR            | G            | G (100%)                              | A (12%)                                     | A (8%)*                                 | G (100%)                      |                    |
| 70,894,131                 | 5'UTR            | G            | G (100%)                              | G (100%)                                    | A (13%)                                 | A (3%)*                       |                    |
| 70,894,159                 | 5'UTR            | G            | G (100%)                              | A (5%)*                                     | A (17%)                                 | G (100%)                      |                    |
| 70,894,234                 | Intron 1         | G            | A (2%)*                               | A (11%)                                     | A (8%)*                                 | G (100%)                      |                    |
| 70,894,357                 | Intron 1         | C            | C (100%)                              | T (11%)                                     | T (3%)*                                 | C (100%)                      |                    |
| 70,894,468                 | Intron 1         | C            | C (100%)                              | T (4%)*                                     | T (12%)                                 | C (100%)                      |                    |
| 70,894,547                 | Intron 1         | A            | A (100%)                              | A (100%)                                    | A (100%)                                | C (100%)                      |                    |
| 70,894,581                 | Intron 1         | C            | C (100%)                              | C (100%)                                    | T (11%)                                 | C (100%)                      |                    |
| 70,894,640                 | Intron 1         | C            | C (97%)                               | C (100%)                                    | T (13%)                                 | C (100%)                      |                    |
| 70,894,751                 | Intron 1         | C            | C (100%)                              | T (11%)                                     | C (100%)                                | C (100%)                      |                    |
| 70,894,799                 | Intron 1         | C            | C (100%)                              | C (100%)                                    | T (11%)                                 | C (100%)                      |                    |
| 70,894,878                 | Intron 1         | C            | C (100%)                              | C (100%)                                    | T (15%)                                 | C (100%)                      |                    |
| 70,894,931                 | Intron 1         | C            | T (2%)*                               | T (13%)                                     | T (5%)*                                 | C (100%)                      |                    |
| 70,895,173                 | Intron 1         | G            | G (98%)                               | A (3%)*                                     | A (14%)                                 | G (100%)                      |                    |
| 70,895,228                 | Intron 1         | C            | C (100%)                              | T (10%)*                                    | T (18%)                                 | C (100%)                      |                    |
| 70,895,232                 | Intron 1         | C            | T (2%)*                               | C (100%)                                    | T (19%)                                 | C (100%)                      |                    |
| 70,895,241                 | Intron 1         | C            | C (100%)                              | C (100%)                                    | T (12%)                                 | C (100%)                      |                    |
| 70,895,243                 | Intron 1         | G            | G (100%)                              | A (13%)                                     | G (100%)                                | G (100%)                      |                    |
| 70,895,244                 | Intron 1         | G            | G (100%)                              | A (13%)                                     | G (100%)                                | G (100%)                      |                    |
| 70,895,361                 | Intron 1         | A            | T (63%)                               | A (100%)                                    | A (100%)                                | A (100%)                      |                    |

|                           |          |        |               |               |                 |               |
|---------------------------|----------|--------|---------------|---------------|-----------------|---------------|
| 70,895,411                | Intron 1 | C      | C (100%)      | T (12%)       | C (100%)        | C (100%)      |
| 70,895,437-<br>70,895,438 | Intron 1 | AC     | delAC (72%)   | delAC (72%)** | delAC (83%)**   | AC (100%)     |
| 70,895,440                | Intron 1 | G      | A (100%)      | A (100%)**    | A (100%)**      | G (100%)      |
| 70,895,441                | Intron 1 | G      | T (100%)      | T (100%)**    | T (100%)**      | G (100%)      |
| 70,895,444                | Intron 1 | T      | G (100%)      | G (80%)**     | G (100%)**      | T (100%)      |
| 70,895,466-<br>70,895,471 | Intron 1 | AAAAAC | AAAAAC (100%) | AAAAAC (100%) | delAAAAAC (12%) | AAAAAC (100%) |
| 70,895,478                | Intron 1 | G      | G (100%)      | G (100%)      | A (14%)         | G (100%)      |
| 70,895,494                | Intron 1 | T      | A (4%)*       | A (11%)       | T (100%)        | T (100%)      |
| 70,895,495                | Intron 1 |        | InsTTG (82%)  | InsTTG (64%)  | InsTTG (95%)    | -             |
| 70,895,572                | Intron 1 | G      | G (100%)      | A (11%)       | G (97%)         | G (100%)      |
| 70,895,628                | Intron 1 | G      | G (98%)       | A (8%)*       | A (15%)         | G (100%)      |
| 70,895,643                | Intron 1 | C      | C (100%)      | C (100%)      | T (13%)         | C (100%)      |
| 70,895,697                | Intron 1 | C      | C (100%)      | C (100%)      | T (16%)         | C (100%)      |
| 70,895,736                | Intron 1 | G      | G (98%)       | A (7%)*       | A (12%)         | G (100%)      |
| 70,895,787                | Intron 1 | G      | G (98%)       | A (3%)*       | A (11%)         | G (100%)      |
| 70,895,846                | Intron 1 | G      | A (2%)*       | A (11%)       | G (100%)        | G (100%)      |
| 70,895,900                | Intron 1 | C      | C (100%)      | T (14%)       | T (5%)*         | T (3%)*       |
| 70,895,902                | Intron 1 | C      | C (100%)      | T (14%)       | T (12%)         | C (100%)      |
| 70,895,905                | Intron 1 | C      | C (100%)      | T (5%)*       | T (13%)         | C (100%)      |
| 70,895,912                | Intron 1 | C      | C (100%)      | T (14%)       | T (13%)         | C (100%)      |
| 70,895,962                | Intron 1 | C      | C (100%)      | T (5%)*       | T (11%)         | C (100%)      |
| 70,896,213                | Intron 1 | G      | G (100%)      | A (15%)       | A (5%)*         | G (100%)      |
| 70,896,255                | Intron 1 | G      | G (100%)      | A (11%)       | G (100%)        | G (100%)      |
| 70,896,257                | Intron 1 | C      | C (100%)      | C (100%)      | T (14%)         | C (100%)      |
| 70,896,285                | Intron 1 | G      | G (100%)      | G (100%)      | A (16%)         | G (100%)      |
| 70,896,365                | Intron 1 | G      | G (100%)      | G (100%)      | A (11%)         | G (100%)      |
| 70,896,509                | Intron 2 | G      | G (100%)      | G (100%)      | A (11%)         | G (100%)      |
| 70,896,812                | Intron 2 | C      | C (100%)      | T (18%)       | T (4%)*         | C (100%)      |
| 70,896,813                | Intron 2 | C      | C (100%)      | T (17%)       | T (5%)*         | C (100%)      |
| 70,896,839                | Intron 2 | G      | G (100%)      | A (11%)       | A (4%)*         | G (100%)      |
| 70,896,875                | Intron 2 | G      | G (100%)      | G (100%)      | A (11%)         | G (100%)      |
| 70,896,876                | Intron 2 | G      | G (100%)      | A (6%)*       | A (11%)         | G (100%)      |
| 70,896,877                | Intron 2 | G      | G (100%)      | G (100%)      | A (11%)         | G (100%)      |
| 70,896,879                | Intron 2 | G      | G (100%)      | G (100%)      | A (13%)         | G (100%)      |

|            |          |     |            |            |           |            |                                          |
|------------|----------|-----|------------|------------|-----------|------------|------------------------------------------|
| 70,897,046 | Intron 2 | G   | G (98%)    | G (100%)   | A (13%)   | G (100%)   |                                          |
| 70,897,113 | Intron 2 | C   | C (100%)   | T (14%)    | C (100%)  | C (100%)   |                                          |
| 70,897,179 | Intron 2 | C   | T (2%)*    | T (6%)*    | T (14%)   | C (100%)   |                                          |
| 70,897,184 | Intron 2 | C   | C (100%)   | C (100%)   | T (18%)   | C (100%)   |                                          |
| 70,897,340 | Intron 2 | G   | G (100%)   | G (100%)   | A (12%)   | G (100%)   |                                          |
| 70,897,444 | Intron 2 | C   | C (100%)   | T (3%)*    | T (11%)   | C (100%)   |                                          |
| 70,897,522 | Intron 2 | C   | C (100%)   | C (100%)   | T (11%)   | C (97%)    |                                          |
| 70,897,523 | Intron 2 | C   | C (98%)    | C (100%)   | T (11%)   | C (100%)   |                                          |
| 70,897,571 | Intron 2 | A   | G (98%)    | G (100%)   | G (96%)   | A (100%)   |                                          |
| 70,897,695 | Intron 2 | G   | G (100%)   | A (4%)*    | A (11%)   | G (100%)   |                                          |
| 70,897,717 | Intron 3 | G   | G (100%)   | A (10%)*   | A (12%)   | G (100%)   |                                          |
| 70,897,806 | Exon 4   | GGG | GGG (100%) | GGA (12%)  | GGA (5%)* | GGG (100%) | GGG→G <sub>9</sub><br>GGA→G <sub>9</sub> |
| 70,897,829 | Intron 4 | G   | G (100%)   | A (5%)*    | A (13%)   | G (100%)   |                                          |
| 70,898,014 | Intron 4 | C   | G (100%)   | G (96%)*   | G (95%)   | C (100%)   |                                          |
| 70,898,016 | Intron 4 | G   | A (2%)*    | A (17%)    | A (5%)*   | G (100%)   |                                          |
| 70,898,027 | Intron 4 | A   | C (100%)   | C (100%)   | C (98%)   | A (100%)   |                                          |
| 70,898,115 | Intron 4 | C   | C (100%)   | C (100%)   | T (11%)   | C (97%)    |                                          |
| 70,898,122 | Intron 4 | C   | C (98%)    | T (13%)    | T (3%)*   | C (100%)   |                                          |
| 70,898,177 | Intron 4 | G   | A (2%)*    | A (11%)    | A (10%)*  | G (100%)   |                                          |
| 70,898,289 | Intron 4 | G   | G (100%)   | G (100%)   | A (11%)   | G (100%)   |                                          |
| 70,898,340 | Intron 4 | G   | A (98%)    | A (100%)   | A (100%)  | G (100%)   |                                          |
| 70,898,459 | Intron 4 | G   | G (100%)   | A (3%)*    | A (11%)   | G (100%)   |                                          |
| 70,898,488 | Intron 4 | T   | T (100%)   | T (100%)   | T (100%)  | C (100%)   |                                          |
| 70,898,561 | Intron 4 | G   | G (100%)   | G (100%)   | A (11%)   | G (100%)   |                                          |
| 70,898,562 | Intron 4 | G   | G (100%)   | A (3%)*    | A (11%)   | G (100%)   |                                          |
| 70,898,563 | Intron 4 | G   | G (100%)   | A (6%)*    | A (11%)   | G (100%)   |                                          |
| 70,898,617 | Intron 4 | G   | G (100%)   | G (97%)    | A (11%)   | G (100%)   |                                          |
| 70,898,619 | Intron 4 | G   | G (100%)   | G (100%)   | A (12%)   | G (100%)   |                                          |
| 70,898,620 | Intron 4 | G   | G (100%)   | A (10%)*   | A (16%)   | G (100%)   |                                          |
| 70,898,623 | Intron 4 | G   | G (100%)   | G (100%)   | A (13%)   | G (100%)   |                                          |
| 70,898,722 | Intron 4 | G   | A (99%)    | A (100%)   | A (100%)  | G (100%)   |                                          |
| 70,898,811 | Intron 4 | G   | G (100%)   | A (9%)*    | A (11%)   | G (100%)   |                                          |
| 70,898,954 | 3'UTR    | G   | A (100%)   | A (100%)   | A (100%)  | G (100%)   |                                          |
| 70,899,036 | Intron 5 | T   | T (100%)   | delT (12%) | T (97%)   | T (100%)   |                                          |

|            |          |   |          |          |          |          |
|------------|----------|---|----------|----------|----------|----------|
| 70,899,037 | Intron 5 | T | A (100%) | A (88%)  | A (100%) | A (95%)  |
| 70,899,067 | Intron 5 | C | T (1%)*  | T (6%)*  | T (12%)  | C (100%) |
| 70,899,203 | Intron 5 | C | T (9%)*  | T (18%)  | C (100%) | T (7%)*  |
| 70,899,225 | Intron 5 | C | C (96%)  | C (100%) | T (19%)  | C (100%) |
| 70,899,239 | Intron 5 | G | G (100%) | A (4%)*  | A (11%)  | G (100%) |
| 70,899,368 | Intron 5 | T | C (98%)  | C (91%)  | C (85%)  | T (100%) |
| 70,899,602 | Intron 5 | G | G (100%) | G (100%) | A (11%)  | G (100%) |
| 70,899,668 | Intron 5 | G | G (98%)  | A (3%)*  | A (11%)  | G (100%) |
| 70,899,676 | Intron 5 | G | G (98%)  | A (3%)*  | A (12%)  | G (100%) |
| 70,899,819 | Intron 5 | C | C (100%) | T (17%)  | T (3%)*  | C (100%) |
| 70,899,836 | Intron 5 | G | G (97%)  | A (6%)*  | A (16%)  | G (100%) |
| 70,899,837 | Intron 5 | G | G (100%) | G (100%) | A (14%)  | G (100%) |
| 70,900,035 | Intron 5 | G | G (100%) | A (13%)  | G (100%) | G (100%) |
| 70,900,037 | Intron 5 | G | G (100%) | G (100%) | A (18%)  | G (100%) |
| 70,900,040 | Intron 5 | G | G (100%) | A (3%)*  | A (11%)  | G (100%) |
| 70,900,108 | Intron 5 | A | G (96%)  | G (88%)  | G (86%)  | G (90%)  |
| 70,900,280 | Intron 5 | G | G (100%) | A (3%)*  | A (11%)  | G (100%) |
| 70,900,305 | Intron 5 | C | T (2%)*  | T (3%)*  | T (15%)  | C (100%) |
| 70,900,315 | Intron 5 | G | G (100%) | G (100%) | A (11%)  | G (100%) |
| 70,900,319 | Intron 5 | G | G (100%) | A (3%)*  | A (21%)  | G (100%) |
| 70,900,396 | Intron 5 | C | C (100%) | C (100%) | T (11%)  | C (100%) |
| 70,900,408 | Intron 5 | G | A (90%)  | A (85%)  | A (63%)  | G (100%) |
| 70,900,563 | Intron 5 | C | C (98%)  | T (3%)*  | T (13%)  | C (97%)  |
| 70,900,602 | Intron 5 | C | C (98%)  | C (100%) | T (4%)*  | T (100%) |
| 70,900,603 | Intron 5 | C | C (100%) | A (100%) | A (41%)  | C (100%) |
| 70,900,622 | Intron 5 | G | G (100%) | G (100%) | A (15%)  | G (100%) |
| 70,900,681 | Intron 5 | C | C (100%) | T (11%)  | C (100%) | C (100%) |
| 70,900,683 | Intron 5 | C | C (100%) | C (100%) | T (11%)  | C (100%) |
| 70,900,728 | Intron 5 | G | G (100%) | A (11%)  | G (100%) | G (100%) |
| 70,900,729 | Intron 5 | G | G (100%) | A (5%)*  | A (27%)  | G (100%) |
| 70,900,731 | Intron 5 | G | G (100%) | A (14%)  | G (100%) | G (100%) |
| 70,900,734 | Intron 5 | G | G (100%) | A (5%)*  | A (20%)  | G (100%) |
| 70,900,751 | Intron 5 | G | G (100%) | A (12%)  | G (100%) | G (100%) |
| 70,900,766 | Intron 5 | G | G (100%) | A (10%)* | A (17%)  | G (100%) |
| 70,900,770 | Intron 5 | C | C (100%) | C (100%) | T (13%)  | C (100%) |

|                           |                      |     |              |              |              |            |
|---------------------------|----------------------|-----|--------------|--------------|--------------|------------|
| 70,900,775                | Intron 5             | G   | G (100%)     | G (100%)     | A (19%)      | G (100%)   |
| 70,900,776                | Intron 5             | G   | G (100%)     | A (5%)*      | A (13%)      | G (100%)   |
| 70,900,799                | Intron 5             | G   | A (3%)*      | A (7%)*      | A (12%)      | A (4%)*    |
| 70,900,856                | Intron 5             | C   | C (100%)     | T (3%)*      | T (12%)      | C (100%)   |
| 70,900,966                | Intron 5             | C   | C (98%)      | T (4%)*      | T (14%)      | C (100%)   |
| 70,901,006                | Intron 5             | C   | C (100%)     | T (11%)      | T (3%)*      | C (100%)   |
| 70,901,013                | Intron 5             | G   | G (100%)     | A (11%)      | A (3%)*      | G (100%)   |
| 70,901,058                | Intron 5             | C   | C (100%)     | T (5%)*      | T (15%)      | C (100%)   |
| 70,901,107                | Intron 5             | G   | G (100%)     | A (14%)      | G (100%)     | G (100%)   |
| 70,901,208                | Intron 5             | C   | C (100%)     | T (12%)      | C (100%)     | C (100%)   |
| 70,901,275                | Intron 5             | A   | G (95%)      | G (89%)      | G (98%)      | A (100%)   |
| 70,901,313                | Intron 5             | G   | G (100%)     | A (14%)      | G (100%)     | G (100%)   |
| 70,901,362                | Intron 5             | A   | G (93%)      | G (100%)     | G (97%)      | A (100%)   |
| 70,901,432                | Intron 5             | C   | C (100%)     | T (12%)      | T (2%)*      | C (100%)   |
| 70,901,488                | Intron 5             | G   | G (100%)     | A (14%)      | G (100%)     | G (100%)   |
| 70,901,496                | Intron 5             | C   | T (1%)*      | T (11%)      | T (6%)*      | C (100%)   |
| 70,901,552                | Intron 5             | G   | G (100%)     | G (100%)     | A (14%)      | G (100%)   |
| 70,901,583                | Intron 5             | C   | T (100%)     | T (100%)     | T (100%)     | T (100%)   |
| 70,901,598                | Intron 5             | G   | G (100%)     | A (3%)*      | A (13%)      | A (3%)*    |
| 70,901,610                | Intron 5             | A   | C (8%)*      | C (8%)*      | C (30%)      | A (100%)   |
| 70,901,729-<br>70,901,731 | Intron 5             | GAT | delGAT (88%) | delGAT (72%) | delGAT (85%) | GAT (100%) |
| 70,901,736                | Intron 5             | A   | A (100%)     | G (13%)      | A (100%)     | A (100%)   |
| 70,901,737                | Intron 5             | T   | T (100%)     | A (13%)      | T (100%)     | T (100%)   |
| 70,901,738                | Intron 5             | G   | G (98%)      | A (13%)      | G (100%)     | G (100%)   |
| 70,901,739                | Intron 5             | G   | G (100%)     | A (11%)      | G (100%)     | G (100%)   |
| 70,901,925                | Intron 5             | A   | T (100%)     | T (100%)     | T (100%)     | A (100%)   |
| 70,901,940                | Intron 5             | A   | G (100%)     | G (96%)      | G (92%)      | A (100%)   |
| 70,902,051                | 3'UTR                | C   | C (100%)     | T (11%)      | T (4%)*      | C (100%)   |
| 70,902,079                | 3'UTR                | C   | A (99%)      | A (100%)     | A (100%)     | C (100%)   |
| 70,902,127                | 3'UTR                | C   | C (100%)     | T (6%)*      | T (14%)      | C (100%)   |
| 70,902,228                | 3'UTR                | C   | C (100%)     | T (2%)*      | T (11%)      | C (100%)   |
| 70,902,290                | Downstream<br>region | C   | C (100%)     | T (2%)*      | T (13%)      | C (100%)   |
| 70,902,355                | Downstream<br>region | C   | T (9%)*      | T (12%)      | T (35%)      | C (100%)   |
| 70,902,357                | Downstream<br>region | T   | C (8%)*      | C (4%)*      | C (29%)      | T (100%)   |

|                   |                   |          |                 |                 |                 |                 |
|-------------------|-------------------|----------|-----------------|-----------------|-----------------|-----------------|
| <b>70,902,601</b> | Downstream region | <b>C</b> | <b>C (100%)</b> | <b>C (100%)</b> | <b>T (12%)</b>  | <b>C (100%)</b> |
| <b>70,902,634</b> | Downstream region | <b>G</b> | <b>G (100%)</b> | <b>G (100%)</b> | <b>A (11%)</b>  | <b>G (100%)</b> |
| <b>70,902,651</b> | Downstream region | <b>C</b> | <b>T (2%)*</b>  | <b>T (7%)*</b>  | <b>T (18%)</b>  | <b>C (100%)</b> |
| <b>70,902,661</b> | Downstream region | <b>C</b> | <b>C (100%)</b> | <b>T (12%)</b>  | <b>C (100%)</b> | <b>C (100%)</b> |
| <b>70,902,690</b> | Downstream region | <b>C</b> | <b>C (100%)</b> | <b>T (4%)*</b>  | <b>T (12%)</b>  | <b>C (100%)</b> |
| <b>70,902,692</b> | Downstream region | <b>C</b> | <b>C (100%)</b> | <b>T (4%)*</b>  | <b>T (13%)</b>  | <b>C (100%)</b> |
| <b>70,902,694</b> | Downstream region | <b>C</b> | <b>C (100%)</b> | <b>C (100%)</b> | <b>T (17%)</b>  | <b>C (100%)</b> |

n.a.: not available; the variant frequency is referred to the percentage of the highlighted base in the sequenced ancient hominine genome, with\* frequency≤10% and \*\* counts<10. In light orange are underlined the variants fixed at 100% in modern human compared to ancient hominines.
