# Supplementary material for: A Catalog of Coding Sequence Variations in Salivary Proteins’ Genes Occurring during Recent Human Evolution
Source: MDPI journal article supplement (doi:10.3390/ijms241915010), 2023-10-09
Supplement: s1 [file s1]

Table S3. Nucleotide Substitutions in *PRB3* gene in introns and regulatory regions

| Genomic Coordinates (hg19) | Gene Region      | Modern human | Altai Neanderthal (Variant Frequency) | Chagyrskaya Neanderthal (Variant Frequency) | Vindija Neanderthal (Variant Frequency) | Denisovan (Variant Frequency) | Codon → amino acid                               |
|----------------------------|------------------|--------------|---------------------------------------|---------------------------------------------|-----------------------------------------|-------------------------------|--------------------------------------------------|
| 11,422,912                 | Upstream regions | A            | A (100%)                              | G (4%)*                                     | A (100%)                                | G (100%)                      |                                                  |
| 11,422,899                 | Upstream regions | G            | G (100%)                              | A (13%)                                     | A (19%)                                 | G (97%)                       |                                                  |
| 11,422,898                 | Upstream regions | G            | G (100%)                              | A (4%)*                                     | A (16%)                                 | A (3%)*                       |                                                  |
| 11,422,897                 | Upstream regions | C            | C (100%)                              | T (8%)*                                     | T (13%)                                 | T (3%)*                       |                                                  |
| 11,422,894                 | Upstream regions | G            | G (100%)                              | A (12%)                                     | G (100%)                                | G (100%)                      |                                                  |
| 11,422,892                 | Upstream regions | C            | C (100%)                              | C (100%)                                    | T (11%)                                 | C (100%)                      |                                                  |
| 11,422,827                 | Upstream regions | C            | C (98%)                               | C (100%)                                    | T (11%)                                 | C (100%)                      |                                                  |
| 11,422,768                 | Upstream regions | C            | C (100%)                              | C (100%)                                    | T (15%)                                 | C (100%)                      |                                                  |
| 11,422,763                 | Upstream regions | G            | G (100%)                              | A (11%)                                     | A (6%)*                                 | G (100%)                      |                                                  |
| 11,422,756                 | Upstream regions | G            | T (95%)                               | T (96%)                                     | T (100%)                                | T (94%)                       |                                                  |
| 11,422,745                 | Upstream regions | C            | C (100%)                              | C (100%)                                    | T (11%)                                 | C (100%)                      |                                                  |
| 11,422,701                 | Upstream regions | C            | C (98%)                               | C (100%)                                    | T (15%)                                 | C (100%)                      |                                                  |
| 11,422,661                 | Upstream regions | C            | C (100%)                              | T (4%)*                                     | T (11%)                                 | C (100%)                      |                                                  |
| 11,422,660                 | Upstream regions | C            | C (100%)                              | C (100%)                                    | T (11%)                                 | C (100%)                      |                                                  |
| 11,422,598                 | Exon 1 (Signal)  | <u>GAT</u>   | <u>GAC</u> (2%)*                      | <u>GAC</u> (8%)*                            | <u>GAC</u> (18%)                        | <u>GAC</u> (11%)              | CUA→L <sub>9(sp)</sub><br>CUG→L <sub>9(sp)</sub> |
| 11,422,513                 | Intron 1         | C            | C (100%)                              | T (18%)                                     | C (100%)                                | C (100%)                      |                                                  |
| 11,422,471                 | Intron 1         | C            | C (100%)                              | T (13%)                                     | C (100%)                                | C (100%)                      |                                                  |
| 11,422,316                 | Intron 1         | C            | C (100%)                              | T (12%)                                     | T (6%)*                                 | C (100%)                      |                                                  |
| 11,422,294                 | Intron 1         | C            | C (100%)                              | T (17%)                                     | T (7%)*                                 | C (98%)                       |                                                  |
| 11,422,265                 | Intron 1         | C            | C (100%)                              | T (12%)                                     | T (11%)                                 | C (100%)                      |                                                  |
| 11,422,251                 | Intron 1         | C            | C (100%)                              | T (4%)*                                     | T (15%)                                 | C (100%)                      |                                                  |
| 11,422,190                 | Intron 1         | A            | C (100%)                              | C (100%)                                    | C (91%)                                 | C (100%)                      |                                                  |
| 11,422,174                 | Intron 1         | G            | G (100%)                              | G (96%)                                     | A (15%)                                 | G (100%)                      |                                                  |
| 11,422,040                 | Intron 1         | G            | G (100%)                              | A (14%)                                     | A (4%)*                                 | G (100%)                      |                                                  |
| 11,422,039                 | Intron 1         | G            | G (97%)                               | A (11%)                                     | G (100%)                                | G (100%)                      |                                                  |
| 11,422,020                 | Intron 1         | C            | C (100%)                              | T (17%)                                     | T (7%)*                                 | C (100%)                      |                                                  |
| 11,422,013                 | Intron 1         | C            | T (2%)*                               | T (12%)                                     | T (4%)*                                 | C (100%)                      |                                                  |
| 11,422,003                 | Intron 1         | C            | C (100%)                              | T (11%)                                     | T (12%)                                 | C (100%)                      |                                                  |
| 11,422,002                 | Intron 1         | C            | C (100%)                              | C (100%)                                    | T (12%)                                 | C (100%)                      |                                                  |

|            |                  |             |                    |                    |                    |                    |                                              |
|------------|------------------|-------------|--------------------|--------------------|--------------------|--------------------|----------------------------------------------|
| 11,421,951 | Intron 1         | C           | C (100%)           | T (11%)            | C (100%)           | C (100%)           |                                              |
| 11,421,787 | Intron 1         | C           | T (4%)*            | C (100%)           | T (11%)            | C (100%)           |                                              |
| 11,421,775 | Intron 1         | G           | G (97%)            | A (13%)            | A (6%)*            | G (100%)           |                                              |
| 11,421,729 | Intron 1         | C           | C (100%)           | C (100%)           | T (13%)            | C (100%)           |                                              |
| 11,421,721 | Intron 1         | A           | G (94%)            | G (100%)           | G (100%)           | G (96%)            |                                              |
| 11,421,713 | Intron 1         | G           | G (100%)           | A (17%)            | G (100%)           | G (100%)           |                                              |
| 11,421,668 | Intron 1         | C           | C (100%)           | C (100%)           | T (16%)            | C (100%)           |                                              |
| 11,421,611 | Intron 1         | G           | G (100%)           | A (6%)*            | A (12%)            | G (100%)           |                                              |
| 11,421,577 | Exon 2<br>(GI-5) | AG <u>G</u> | AG <u>G</u> (100%) | AG <u>A</u> (11%)  | AG <u>G</u> (100%) | AG <u>G</u> (100%) | UCC→S <sub>14</sub><br>UCU→S <sub>14</sub>   |
| 11,421,454 | Intron 1         | C           | T (2%)*            | T (6%)*            | T (16%)            | C (100%)           |                                              |
| 11,421,371 | Intron 1         | C           | C (100%)           | C (100%)           | A (56%)            | A (3%)*            |                                              |
| 11,421,352 | Intron 1         | C           | C (100%)           | C (100%)           | T (18%)            | C (100%)           |                                              |
| 11,421,344 | Intron 1         | C           | C (100%)           | C (100%)           | T (18%)            | C (100%)           |                                              |
| 11,421,329 | Intron 1         | C           | C (100%)           | C (100%)           | T (17%)            | C (100%)           |                                              |
| 11,421,325 | Intron 1         | C           | C (100%)           | C (100%)           | T (14%)            | C (100%)           |                                              |
| 11,421,322 | Intron 1         | C           | T (2%)*            | C (100%)           | T (13%)            | C (100%)           |                                              |
| 11,421,318 | Intron 2         | G           | G (100%)           | A (18%)            | A (6%)*            | G (100%)           |                                              |
| 11,421,295 | Intron 2         | C           | C (100%)           | T (13%)            | T (4%)*            | C (100%)           |                                              |
| 11,421,294 | Intron 2         | C           | C (100%)           | T (27%)            | C (100%)           | C (100%)           |                                              |
| 11,421,286 | Intron 2         | G           | G (100%)           | A (13%)            | G (100%)           | G (100%)           |                                              |
| 11,421,265 | Intron 2         | C           | C (100%)           | A (8%)*            | C (97%)            | A (13%)            |                                              |
| 11,421,102 | Intron 2         | G           | G (100%)           | G (100%)           | A (16%)            | G (100%)           |                                              |
| 11,421,099 | Intron 2         | C           | C (100%)           | C (100%)           | T (13%)            | C (100%)           |                                              |
| 11,420,967 | Exon 3<br>(GI-5) | GG <u>T</u> | GG <u>T</u> (100%) | GG <u>C</u> (36%)  | GG <u>T</u> (100%) | GG <u>T</u> (100%) | CCA→P <sub>56</sub><br>CCG→P <sub>56</sub>   |
| 11,420,841 | Exon 3<br>(GI-5) | GG <u>T</u> | GG <u>C</u> (27%)  | GG <u>T</u> (100%) | GG <u>T</u> (100%) | GG <u>T</u> (100%) | CCA→P <sub>98</sub><br>CCG→P <sub>98</sub>   |
| 11,420,799 | Exon 3<br>(GI-5) | CC <u>T</u> | CC <u>T</u> (100%) | CC <u>T</u> (100%) | CC <u>G</u> (20%)  | CC <u>T</u> (100%) | GGA→G <sub>112</sub><br>GGC→G <sub>112</sub> |
| 11,420,781 | Exon 3<br>(GI-5) | GG <u>G</u> | GG <u>G</u> (100%) | GG <u>A</u> (11%)  | GG <u>A</u> (5%)*  | GG <u>G</u> (100%) | CCC→P <sub>118</sub><br>CCU→P <sub>118</sub> |
| 11,420,736 | Exon 3<br>(GI-5) | CC <u>T</u> | CC <u>T</u> (100%) | CC <u>G</u> (27%)  | CC <u>G</u> (14%)  | CC <u>T</u> (100%) | GGA→G <sub>133</sub><br>GGC→G <sub>133</sub> |
| 11,420,715 | Exon 3<br>(GI-5) | GG <u>C</u> | GG <u>T</u> (2%)*  | GG <u>T</u> (24%)  | GG <u>T</u> (4%)*  | GG <u>C</u> (100%) | CCG→P <sub>140</sub><br>CCA→P <sub>140</sub> |
| 11,420,601 | Exon 3<br>(GI-2) | AG <u>G</u> | AG <u>G</u> (100%) | AG <u>G</u> (100%) | AG <u>A</u> (11%)  | AG <u>G</u> (100%) | UCC→S <sub>178</sub><br>UCU→S <sub>178</sub> |
| 11,420,496 | Exon 3<br>(GI-2) | GG <u>G</u> | GG <u>A</u> (12%)  | GG <u>G</u> (97%)  | GG <u>A</u> (3%)*  | GG <u>A</u> (8%)*  | CCC→P <sub>213</sub><br>CCU→P <sub>213</sub> |
| 11,420,458 | Intron 3         | C           | T (16%)            | T (4%)*            | T (33%)            | T (15%)            |                                              |
| 11,420,454 | Intron 3         | T           | T (100%)           | C (37%)            | C (18%)            | T (100%)           |                                              |
| 11,420,440 | Intron 3         | C           | C (100%)           | T (4%)*            | T (14%)            | C (100%)           |                                              |

|            |                  |     |            |            |                           |             |                                              |
|------------|------------------|-----|------------|------------|---------------------------|-------------|----------------------------------------------|
| 11,420,432 | Intron 3         | G   | G (100%)   | G (100%)   | A (11%)                   | G (100%)    |                                              |
| 11,420,407 | Intron 3         | C   | C (100%)   | T (16%)    | C (100%)                  | C (100%)    |                                              |
| 11,420,403 | Intron 3         | G   | A (2%)*    | A (14%)    | G (100%)                  | G (100%)    |                                              |
| 11,420,399 | Intron 3         | G   | A (9%)*    | A (13%)    | G (98%)                   | G (100%)    |                                              |
| 11,420,395 | Intron 3         | C   | T (6%)*    | C (100%)   | T (15%)                   | C (100%)    |                                              |
| 11,420,372 | Intron 3         | G   | G (100%)   | A (8%)*    | A (13%)                   | G (100%)    |                                              |
| 11,420,337 | Intron 3         | T   | T (100%)   | G (18%)    | G (17%)**                 | T (100%)    |                                              |
| 11,420,336 | Intron 3         | G   | G (100%)   | T (24%)    | T (17%)**                 | G (100%)    |                                              |
| 11,420,334 | Intron 3         | G   | delG (91%) | delG (77%) | delG (50%)**<br>A (50%)** | delG (89%)  |                                              |
| 11,420,306 | Exon 4<br>(Gl-2) | GGG | GGG (100%) | GGA (12%)  | GGA (5%)*                 | GGG (100%)  | CCC→P <sub>234</sub><br>CCU→P <sub>234</sub> |
| 11,420,246 | Exon 4<br>(Gl-2) | GGG | GGG (100%) | GGG (100%) | GGA (14%)                 | GGG (100%)  | CCC→P <sub>254</sub><br>CCU→P <sub>254</sub> |
| 11,420,225 | Exon 4<br>(Gl-2) | GTC | GTC (100%) | GTC (100%) | GTT (12%)                 | GTC (100%)  | CAG→Q <sub>261</sub><br>CAA→Q <sub>261</sub> |
| 11,420,218 | Exon 4<br>(Gl-2) | GAC | GAC (100%) | GAC (100%) | AAC (15%)                 | GAC (100%)  | CUG→L <sub>264</sub><br>UUG→L <sub>264</sub> |
| 11,420,109 | 3'UTR            | C   | C (100%)   | T (4%)*    | T (11%)                   | C (100%)    |                                              |
| 11,420,006 | Intron 4         | G   | delG (95%) | delG (88%) | delG (97%)                | delG (100%) |                                              |
| 11,419,970 | Intron 4         | G   | G (100%)   | A (12%)    | A (5%)*                   | G (100%)    |                                              |
| 11,419,953 | Intron 4         | C   | C (100%)   | C (100%)   | T (11%)                   | C (100%)    |                                              |
| 11,419,836 | Intron 4         | G   | G (100%)   | A (6%)*    | A (13%)                   | G (100%)    |                                              |
| 11,419,782 | Intron 4         | G   | G (100%)   | A (12%)    | G (100%)                  | G (100%)    |                                              |
| 11,419,678 | Intron 4         | G   | G (100%)   | A (15%)    | A (3%)*                   | G (100%)    |                                              |
| 11,419,650 | Intron 4         | G   | A (2%)*    | A (11%)    | A (4%)*                   | G (100%)    |                                              |
| 11,419,630 | Intron 4         | C   | T (100%)   | T (100%)   | T (98%)                   | T (100%)    |                                              |
| 11,419,573 | Intron 4         | G   | G (100%)   | A (17%)    | A (8%)*                   | G (100%)    |                                              |
| 11,419,509 | Intron 4         | C   | C (100%)   | T (7%)*    | T (16%)                   | C (100%)    |                                              |
| 11,419,513 | Intron 4         | G   | G (100%)   | A (12%)    | G (100%)                  | G (100%)    |                                              |
| 11,419,505 | Intron 4         | A   | G (100%)   | A (100%)   | A (100%)                  | A (100%)    |                                              |
| 11,419,379 | Intron 4         | C   | C (100%)   | C (100%)   | T (11%)                   | C (100%)    |                                              |
| 11,419,295 | Intron 4         | G   | G (100%)   | G (100%)   | A (12%)                   | G (100%)    |                                              |
| 11,419,132 | Intron 4         | G   | G (100%)   | G (100%)   | A (12%)                   | G (100%)    |                                              |
| 11,419,080 | Intron 4         | C   | C (100%)   | T (17%)    | C (100%)                  | C (100%)    |                                              |
| 11,419,079 | Intron 4         | C   | C (100%)   | T (13%)    | T (8%)*                   | C (100%)    |                                              |
| 11,419,072 | Intron 4         | C   | T (3%)*    | T (10%)*   | T (11%)                   | C (100%)    |                                              |
| 11,419,071 | Intron 4         | C   | C (100%)   | T (14%)    | T (5%)*                   | C (100%)    |                                              |

|            |                    |   |          |          |          |          |
|------------|--------------------|---|----------|----------|----------|----------|
| 11,419,031 | Intron 4           | G | G (100%) | G (100%) | A (14%)  | G (100%) |
| 11,419,011 | Intron 4           | G | G (100%) | G (100%) | A (13%)  | G (100%) |
| 11,419,001 | Intron 4           | G | G (100%) | A (14%)  | A (4%)*  | G (100%) |
| 11,418,969 | Intron 4           | C | C (100%) | T (13%)  | C (100%) | C (100%) |
| 11,418,876 | 3'UTR              | G | G (100%) | A (5%)*  | A (27%)  | G (100%) |
| 11,418,771 | Downstream regions | G | A (2%)*  | G (100%) | A (11%)  | G (100%) |
| 11,418,769 | Downstream regions | G | G (100%) | A (13%)  | A (4%)*  | G (100%) |
| 11,418,741 | Downstream regions | G | G (100%) | A (11%)  | A (8%)*  | G (100%) |
| 11,418,740 | Downstream regions | G | G (98%)  | G (100%) | A (15%)  | G (100%) |
| 11,418,645 | Downstream regions | C | C (100%) | C (100%) | T (14%)  | C (100%) |
| 11,418,639 | Downstream regions | G | G (98%)  | A (11%)  | G (100%) | G (100%) |
| 11,418,631 | Downstream regions | G | A (4%)*  | A (11%)  | A (14%)  | G (100%) |
| 11,418,630 | Downstream regions | G | G (98%)  | A (17%)  | G (100%) | A (4%)*  |
| 11,418,627 | Downstream regions | C | C (100%) | C (100%) | T (13%)  | C (100%) |
| 11,418,626 | Downstream regions | C | C (100%) | C (100%) | T (17%)  | C (100%) |
| 11,418,570 | Downstream regions | C | C (100%) | T (11%)  | T (11%)  | C (100%) |
| 11,418,557 | Downstream regions | G | A (3%)*  | A (3%)*  | A (12%)  | G (100%) |
| 11,418,555 | Downstream regions | G | G (98%)  | G (100%) | A (12%)  | G (100%) |
| 11,418,546 | Downstream regions | G | A (3%)*  | G (100%) | A (15%)  | G (100%) |
| 11,418,508 | Downstream regions | C | C (100%) | C (100%) | T (11%)  | C (100%) |
| 11,418,414 | Downstream regions | G | G (100%) | G (100%) | A (15%)  | G (100%) |
| 11,418,410 | Downstream regions | T | C (98%)  | C (95%)  | C (90%)  | C (100%) |
| 11,418,406 | Downstream regions | C | C (100%) | C (100%) | T (11%)  | C (100%) |
| 11,418,394 | Downstream regions | C | T (6%)*  | C (100%) | T (17%)  | C (100%) |
| 11,418,393 | Downstream regions | C | C (100%) | T (13%)  | T (6%)*  | C (100%) |
| 11,418,386 | Downstream regions | G | G (100%) | G (100%) | A (14%)  | G (100%) |
| 11,418,372 | Downstream regions | G | G (100%) | A (18%)  | A (7%)*  | G (100%) |
| 11,418,368 | Downstream regions | G | G (100%) | G (100%) | A (14%)  | G (100%) |

n.a.: not available; the variant frequency is referred to the percentage of the highlighted base in the sequenced ancient hominine genome, with\* frequency≤10% and \*\* counts<10. In light orange are underlined the variants fixed at 100% in modern human compared to ancient hominines.
