# Supplementary material for: A Catalog of Coding Sequence Variations in Salivary Proteins’ Genes Occurring during Recent Human Evolution
Source: MDPI journal article supplement (doi:10.3390/ijms241915010), 2023-10-09
Supplement: s1 [file s1]

Table S8. Nucleotide Substitutions in *AMY1A* gene in introns and regulatory regions

| Genomic Coordinates (hg19) | Gene Region     | Modern human | Altai Neanderthal (Variant Frequency) | Chagyrskaya Neanderthal (Variant Frequency) | Vindija Neanderthal (Variant Frequency) | Denisovan (Variant Frequency) | Codon → Amino acid                         |
|----------------------------|-----------------|--------------|---------------------------------------|---------------------------------------------|-----------------------------------------|-------------------------------|--------------------------------------------|
| 104,239,478                | Upstream region | G            | G (100%)                              | G (100%)                                    | A (17%)                                 | G (100%)                      |                                            |
| 104,239,460                | Upstream region | C            | C (100%)                              | C (100%)                                    | T (14%)                                 | C (100%)                      |                                            |
| 104,239,450                | Upstream region | G            | G (100%)                              | G (100%)                                    | A (13%)                                 | G (100%)                      |                                            |
| 104,239,175                | Upstream region | C            | C (100%)                              | C (100%)                                    | T (14%)                                 | C (100%)                      |                                            |
| 104,239,005                | 5'UTR           | G            | G (100%)                              | G (100%)                                    | A (27%)                                 | G (100%)                      |                                            |
| 104,238,932                | 5'UTR           | C            | C (100%)                              | T (18%)                                     | C (100%)                                | C (100%)                      |                                            |
| 104,238,918                | 5'UTR           | G            | G (100%)                              | G (100%)                                    | A (11%)                                 | G (100%)                      |                                            |
| 104,238,905                | 5'UTR           | C            | C (100%)                              | C (100%)                                    | T (13%)                                 | C (100%)                      |                                            |
| 104,238,850                | 5'UTR           | G            | G (100%)                              | G (100%)                                    | A (15%)                                 | G (100%)                      |                                            |
| 104,238,820                | 5'UTR           | C            | C (100%)                              | C (100%)                                    | T (18%)                                 | C (100%)                      |                                            |
| 104,238,815                | 5'UTR           | C            | C (100%)                              | C (100%)                                    | T (17%)                                 | C (100%)                      |                                            |
| 104,238,794                | 5'UTR           | G            | A (100%)                              | A (100%)                                    | A (90%)                                 | A (100%)**                    |                                            |
| 104,238,676                | 5'UTR           | G            | G (100%)                              | G (100%)                                    | A (20%)                                 | G (100%)                      |                                            |
| 104,238,649                | Intron 1        | G            | G (98%)                               | A (8%)*                                     | A (18%)                                 | G (100%)                      |                                            |
| 104,238,648                | Intron 1        | G            | A (3%)*                               | G (100%)                                    | A (20%)                                 | G (100%)                      |                                            |
| 104,238,610                | Intron 1        | C            | T (3%)*                               | C (100%)                                    | C (100%)                                | T (27%)                       |                                            |
| 104,238,487                | Intron 1        | T            | delT (23%)                            | T (100%)                                    | delT (30%)                              | delT (29%)                    |                                            |
| 104,238,486                | Intron 1        | C            | T (14%)                               | C (100%)                                    | T (17%)                                 | T (21%)                       |                                            |
| 104,238,481                | Intron 1        | C            | T (7%)*                               | C (100%)                                    | C (100%)                                | T (14%)                       |                                            |
| 104,238,366                | Intron 1        | C            | C (100%)                              | T (14%)                                     | C (100%)                                | C (100%)                      |                                            |
| 104,238,362                | Intron 1        | C            | C (100%)                              | C (100%)                                    | T (11%)                                 | C (100%)                      |                                            |
| 104,238,354                | Intron 1        | C            | C (100%)                              | C (100%)                                    | T (11%)                                 | C (100%)                      |                                            |
| 104,238,317                | Intron 1        | G            | G (100%)                              | G (91%)                                     | A (11%)                                 | G (100%)                      |                                            |
| 104,238,094                | Exon 2          | GTC          | GTC (100%)                            | GTC (100%)                                  | GTT (17%)                               | GTC (100%)                    | CAG→Q <sub>41</sub><br>CAA→Q <sub>41</sub> |
| 104,238,054                | Intron 2        | C            | G (100%)                              | G (100%)                                    | G (100%)                                | G (100%)**                    |                                            |
| 104,238,050                | Intron 2        | C            | C (100%)                              | T (6%)*                                     | T (13%)                                 | C (100%)                      |                                            |
| 104,238,047                | Intron 2        | C            | C (100%)                              | T (12%)                                     | T (15%)                                 | C (100%)                      |                                            |
| 104,238,025                | Intron 2        | T            | T (100%)                              | T (100%)                                    | C (94%)                                 | T (100%)                      |                                            |
| 104,238,017                | Intron 2        | G            | G (100%)                              | A (8%)*                                     | A (12%)                                 | G (100%)                      |                                            |
| 104,237,948                | Intron 2        | C            | C (100%)                              | C (100%)                                    | T (18%)                                 | C (100%)                      |                                            |

|             |          |             |                    |                    |                   |                    |                                              |
|-------------|----------|-------------|--------------------|--------------------|-------------------|--------------------|----------------------------------------------|
| 104,237,938 | Intron 2 | G           | G (100%)           | G (100%)           | A (13%)           | G (100%)           |                                              |
| 104,237,897 | Intron 2 | C           | C (100%)           | T (8%)*            | T (13%)           | C (100%)           |                                              |
| 104,237,850 | Intron 2 | G           | G (100%)           | G (100%)           | A (15%)           | G (100%)           |                                              |
| 104,237,816 | Intron 2 | T           | C (87%)            | C (89%)            | C (100%)          | C (100%)           |                                              |
| 104,237,595 | Intron 3 | C           | C (100%)           | C (100%)           | T (14%)           | C (100%)           |                                              |
| 104,237,546 | Intron 3 | G           | G (100%)           | A (11%)            | A (8%)*           | G (100%)           |                                              |
| 104,237,512 | Intron 3 | G           | G (100%)           | A (18%)            | G (100%)          | G (100%)           |                                              |
| 104,237,472 | Intron 3 | T           | C (100%)           | C (100%)           | T (100%)          | T (100%)           |                                              |
| 104,237,461 | Intron 3 | G           | G (100%)           | A (25%)            | G (100%)          | G (100%)           |                                              |
| 104,237,384 | Intron 3 | T           | G (100%)           | G (100%)           | G (100%)          | G (100%)           |                                              |
| 104,237,332 | Intron 3 | C           | C (100%)           | C (100%)           | T (11%)           | C (100%)           |                                              |
| 104,237,331 | Intron 3 | C           | C (100%)           | C (100%)           | T (11%)           | C (100%)           |                                              |
| 104,237,328 | Intron 3 | C           | C (100%)           | C (100%)           | T (11%)           | C (100%)           |                                              |
| 104,237,319 | Intron 3 | C           | C (100%)           | T (12%)            | C (100%)          | C (100%)           |                                              |
| 104,237,314 | Intron 3 | C           | C (100%)           | C (100%)           | T (12%)           | C (100%)           |                                              |
| 104,237,254 | Intron 3 | G           | G (100%)           | G (100%)           | G (100%)          | A (93%)            |                                              |
| 104,237,248 | Intron 3 | G           | G (100%)           | A (5%)*            | G (100%)          | A (13%)            |                                              |
| 104,237,245 | Intron 3 | C           | C (100%)           | C (100%)           | C (100%)          | A (13%)            |                                              |
| 104,237,229 | Intron 3 | C           | C (100%)           | T (12%)            | C (100%)          | C (100%)           |                                              |
| 104,237,220 | Intron 3 | C           | C (100%)           | T (11%)            | C (100%)          | C (100%)           |                                              |
| 104,237,214 | Intron 3 | G           | G (100%)           | A (14%)            | A (7%)*           | G (100%)           |                                              |
| 104,237,205 | Intron 3 | C           | C (100%)           | T (8%)*            | T (13%)           | C (100%)           |                                              |
| 104,237,078 | Intron 3 | C           | A (100%)           | A (100%)           | A (100%)          | A (100%)**         |                                              |
| 104,236,994 | Intron 3 | C           | T (100%)           | T (100%)           | T (100%)          | T (100%)**         |                                              |
| 104,236,974 | Intron 3 | C           | C (100%)           | T (7%)*            | T (20%)           | C (100%)           |                                              |
| 104,236,963 | Intron 3 | C           | C (100%)           | C (100%)           | T (20%)           | C (100%)           |                                              |
| 104,236,949 | Intron 3 | G           | G (100%)           | A (14%)            | G (100%)          | G (100%)           |                                              |
| 104,236,905 | Intron 3 | C           | C (100%)           | C (100%)           | C (100%)          | T (79%)            |                                              |
| 104,236,901 | Intron 3 | C           | C (100%)           | T (8%)*            | T (11%)           | C (100%)           |                                              |
| 104,236,715 | Exon 4   | AT <u>G</u> | AT <u>G</u> (100%) | AT <u>G</u> (100%) | AT <u>A</u> (14%) | AT <u>G</u> (100%) | UAC→Y <sub>118</sub><br>UAU→Y <sub>118</sub> |
| 104,236,425 | Intron 4 | A           | A (100%)           | A (100%)           | A (100%)          | C (100%)           |                                              |
| 104,236,399 | Intron 4 | C           | C (100%)           | C (100%)           | T (13%)           | C (100%)           |                                              |
| 104,236,396 | Intron 4 | G           | G (100%)           | A (13%)            | A (6%)*           | G (100%)           |                                              |
| 104,236,381 | Intron 4 | G           | G (100%)           | G (100%)           | A (11%)           | G (100%)           |                                              |

|             |          |     |            |             |            |            |                                              |
|-------------|----------|-----|------------|-------------|------------|------------|----------------------------------------------|
| 104,236,379 | Intron 4 | G   | G (100%)   | G (100%)    | A (11%)    | G (100%)   |                                              |
| 104,236,340 | Intron 4 | G   | G (100%)   | A (14%)     | A (10%)*   | G (100%)   |                                              |
| 104,236,262 | Intron 4 | C   | C (100%)   | C (100%)    | T (13%)    | C (100%)   |                                              |
| 104,236,261 | Intron 4 | A   | A (100%)   | T (100%)    | A (100%)   | A (100%)   |                                              |
| 104,236,192 | Intron 4 | C   | T (3%)*    | C (100%)    | T (14%)    | C (100%)   |                                              |
| 104,236,153 | Intron 4 | C   | C (100%)   | C (100%)    | T (13%)    | C (100%)   |                                              |
| 104,236,135 | Exon 5   | GAC | GAC (100%) | GAC (100%)  | GAT (11%)  | GAC (100%) | CUG→L <sub>162</sub><br>CUA→L <sub>162</sub> |
| 104,236,108 | Exon 5   | CCC | CCC (100%) | CCT (11%)** | CCT (13%)  | CCC (100%) | GGG→G <sub>171</sub><br>GGA→G <sub>171</sub> |
| 104,235,967 | Exon 5   | TTG | TTG (100%) | TTA (14%)   | TTG (100%) | TTG (100%) | AAC→N <sub>218</sub><br>AAU→N <sub>218</sub> |
| 104,235,656 | Intron 5 | T   | delT (97%) | delT (78%)  | delT (73%) | delT (91%) |                                              |
| 104,235,449 | Intron 5 | C   | C (100%)   | C (100%)    | T (19%)    | T (11%)**  |                                              |
| 104,235,370 | Intron 5 | G   | G (100%)   | G (100%)    | A (13%)    | G (100%)   |                                              |
| 104,235,337 | Intron 5 | C   | C (100%)   | C (100%)    | T (15%)    | C (100%)   |                                              |
| 104,235,186 | Intron 5 | G   | G (100%)   | G (100%)    | A (14%)    | G (100%)   |                                              |
| 104,235,171 | Exon 6   | GAC | GAC (100%) | GAT (8%)*   | GAT (11%)  | GAC (100%) | CUG→L <sub>237</sub><br>CUA→L <sub>237</sub> |
| 104,235,144 | Exon 6   | CTG | CTG (100%) | CTG (100%)  | CTA (15%)  | CTG (100%) | GAC→D <sub>246</sub><br>GAU→D <sub>246</sub> |
| 104,235,096 | Exon 6   | GAG | GAA (3%)*  | GAA (19%)   | GAA (52%)  | GAG (100%) | CUC→L <sub>262</sub><br>CUU→L <sub>262</sub> |
| 104,234,993 | Intron 6 | G   | G (100%)   | A (20%)     | A (10%)*   | G (100%)   |                                              |
| 104,234,937 | Intron 6 | C   | C (100%)   | C (100%)    | T (27%)    | C (100%)   |                                              |
| 104,234,877 | Intron 6 | C   | C (100%)   | C (100%)    | T (20%)    | C (100%)   |                                              |
| 104,234,553 | Intron 6 | G   | G (100%)   | G (100%)    | A (11%)    | A (11%)**  |                                              |
| 104,234,436 | Intron 6 | C   | C (100%)   | T (20%)     | C (100%)   | C (100%)   |                                              |
| 104,234,328 | Intron 6 | G   | G (100%)   | G (100%)    | A (14%)    | G (100%)   |                                              |
| 104,234,256 | Intron 6 | C   | T (28%)    | T (33%)     | T (10%)*   | C (100%)** |                                              |
| 104,234,233 | Intron 6 | C   | T (3%)*    | C (100%)    | T (15%)    | C (100%)   |                                              |
| 104,234,009 | Exon 8   | ATG | ATA (7%)*  | ATA (14%)   | ATA (14%)  | ATA (13%)  | UAC→Y <sub>321</sub><br>UAU→Y <sub>321</sub> |
| 104,233,908 | Intron 8 | A   | A (100%)   | A (100%)    | A (100%)   | C (17%)    |                                              |
| 104,233,903 | Intron 8 | C   | C (100%)   | C (100%)    | T (18%)    | C (100%)   |                                              |
| 104,233,860 | Intron 8 | G   | G (100%)   | A (14%)     | A (8%)*    | G (100%)   |                                              |
| 104,233,857 | Intron 8 | G   | G (100%)   | G (100%)    | A (15%)    | G (100%)   |                                              |
| 104,233,840 | Intron 8 | G   | G (100%)   | G (100%)    | A (13%)    | G (100%)   |                                              |
| 104,233,833 | Intron 8 | C   | C (100%)   | T (11%)     | T (6%)*    | C (100%)   |                                              |
| 104,233,831 | Intron 8 | C   | C (100%)   | C (100%)    | T (17%)    | C (100%)   |                                              |
| 104,233,787 | Intron 8 | C   | C (100%)   | T (9%)*     | T (11%)    | C (100%)   |                                              |

|             |          |   |          |          |          |            |
|-------------|----------|---|----------|----------|----------|------------|
| 104,233,775 | Intron 8 | T | T (100%) | T (100%) | T (100%) | C (10%)*   |
| 104,233,766 | Intron 8 | C | C (100%) | T (13%)  | T (20%)  | C (100%)   |
| 104,233,765 | Intron 8 | C | C (100%) | T (13%)  | C (92%)  | C (100%)   |
| 104,233,718 | Intron 8 | G | G (100%) | A (15%)  | G (100%) | G (100%)   |
| 104,233,648 | Intron 8 | G | G (100%) | A (18%)  | G (100%) | G (100%)   |
| 104,233,645 | Intron 8 | G | G (100%) | A (18%)  | G (100%) | G (100%)   |
| 104,233,598 | Intron 8 | G | G (100%) | G (100%) | A (20%)  | G (100%)   |
| 104,233,330 | Intron 8 | G | G (100%) | G (100%) | A (18%)  | G (100%)   |
| 104,233,260 | Intron 8 | C | C (100%) | T (17%)  | C (100%) | C (100%)   |
| 104,233,193 | Intron 8 | G | G (100%) | G (100%) | A (12%)  | G (100%)   |
| 104,233,189 | Intron 8 | G | G (100%) | G (100%) | A (13%)  | G (100%)   |
| 104,233,186 | Intron 8 | G | G (100%) | G (100%) | A (12%)  | G (100%)   |
| 104,233,127 | Intron 8 | G | T (97%)  | G (100%) | G (95%)  | G (100%)** |
| 104,233,126 | Intron 8 | G | G (100%) | G (100%) | A (11%)  | G (100%)   |
| 104,232,949 | Intron 8 | G | G (100%) | A (11%)  | G (100%) | G (100%)   |
| 104,232,911 | Intron 8 | G | G (100%) | A (11%)  | G (100%) | G (100%)   |
| 104,232,902 | Intron 8 | C | C (100%) | C (100%) | T (11%)  | C (100%)   |
| 104,232,892 | Intron 8 | C | C (100%) | T (20%)  | T (12%)  | C (100%)   |
| 104,232,891 | Intron 8 | C | C (100%) | T (20%)  | T (6%)*  | C (100%)   |
| 104,232,886 | Intron 8 | G | G (100%) | A (9%)*  | A (11%)  | G (100%)   |
| 104,232,884 | Intron 8 | G | G (100%) | G (100%) | A (12%)  | G (100%)   |
| 104,232,882 | Intron 8 | C | C (100%) | C (100%) | T (11%)  | C (100%)   |
| 104,232,646 | Intron 8 | A | G (97%)  | G (86%)  | G (100%) | G (100%)   |
| 104,232,616 | Intron 8 | C | C (100%) | C (100%) | C (100%) | T (10%)*   |
| 104,232,532 | Intron 8 | G | G (100%) | G (100%) | A (11%)  | G (100%)   |
| 104,232,489 | Intron 8 | C | C (100%) | C (100%) | T (13%)  | C (100%)   |
| 104,232,186 | Intron 8 | G | G (100%) | A (13%)  | A (10%)* | G (100%)   |
| 104,232,184 | Intron 8 | C | C (100%) | T (13%)  | T (20%)  | C (100%)   |
| 104,232,161 | Intron 8 | C | C (100%) | C (100%) | T (17%)  | C (100%)   |
| 104,232,130 | Intron 8 | C | C (100%) | T (25%)  | C (100%) | C (100%)   |
| 104,232,117 | Intron 8 | G | G (100%) | G (100%) | G (100%) | T (10%)*   |
| 104,232,025 | Intron 8 | G | G (100%) | A (18%)  | G (100%) | G (100%)   |
| 104,231,993 | Intron 8 | C | C (100%) | C (100%) | T (14%)  | C (100%)   |
| 104,231,798 | Intron 9 | C | C (100%) | T (11%)  | C (100%) | C (100%)   |
| 104,231,749 | Intron 9 | C | C (100%) | C (100%) | T (13%)  | C (100%)   |

|             |           |     |           |           |            |              |                                              |
|-------------|-----------|-----|-----------|-----------|------------|--------------|----------------------------------------------|
| 104,231,731 | Intron 9  | G   | G (100%)  | A (15%)   | G (100%)   | G (100%)     |                                              |
| 104,231,642 | Exon 10   | CCC | CCT(4%)*  | CCC(100%) | CCT(17%)   | CCT(5%)*     | GGG→G <sub>413</sub><br>GGA→G <sub>413</sub> |
| 104,231,621 | Exon 10   | CCC | CCC(100%) | CCC(100%) | CCT(13%)   | CCC(100%)    | GGG→G <sub>420</sub><br>GGA→G <sub>420</sub> |
| 104,231,542 | Intron 10 | C   | C (100%)  | C (100%)  | T (13%)    | C (100%)     |                                              |
| 104,231,514 | Intron 10 | A   | A (100%)  | A (100%)  | InsA (14%) | DelA (14%)** |                                              |
| 104,231,438 | Intron 10 | C   | C (100%)  | T (7%)*   | T (14%)    | C (100%)     |                                              |
| 104,231,411 | Intron 10 | G   | G (100%)  | A (19%)   | G (100%)   | G (100%)     |                                              |
| 104,231,404 | Intron 10 | C   | T (4%)*   | C (100%)  | T (12%)    | T (13%)**    |                                              |
| 104,231,298 | Intron 10 | G   | G (100%)  | G (100%)  | A (15%)    | G (100%)     |                                              |
| 104,231,278 | Intron 10 | C   | C (97%)   | C (100%)  | T (12%)    | C (100%)     |                                              |
| 104,231,242 | Intron 10 | G   | G (100%)  | A (27%)   | G (100%)   | G (100%)     |                                              |
| 104,231,201 | Intron 10 | C   | C (100%)  | C (94%)   | T (14%)    | C (100%)     |                                              |
| 104,231,200 | Intron 10 | G   | G (100%)  | A (6%)*   | A (14%)    | G (100%)     |                                              |
| 104,231,175 | Intron 10 | G   | G (100%)  | A (18%)   | G (100%)   | G (100%)     |                                              |
| 104,231,134 | Intron 10 | G   | G (100%)  | A (17%)   | A (17%)    | G (100%)     |                                              |
| 104,231,089 | Intron 10 | C   | C (100%)  | C (100%)  | T (13%)    | C (100%)     |                                              |
| 104,231,088 | Intron 10 | G   | G (100%)  | G (100%)  | A (14%)    | G (100%)     |                                              |
| 104,231,043 | Intron 10 | C   | C (100%)  | T (16%)   | C (100%)   | C (100%)     |                                              |
| 104,231,040 | Intron 10 | C   | C (100%)  | C (100%)  | T (15%)    | C (100%)     |                                              |
| 104,231,033 | Intron 10 | C   | C (100%)  | T (6%)*   | T (15%)    | C (100%)     |                                              |
| 104,231,005 | Intron 10 | C   | C (100%)  | T (14%)   | C (100%)   | C (100%)     |                                              |
| 104,230,805 | Intron 10 | G   | G (100%)  | G (100%)  | A (13%)    | G (100%)     |                                              |
| 104,230,786 | Intron 10 | G   | G (100%)  | G (100%)  | A (15%)    | G (100%)     |                                              |
| 104,230,664 | Intron 10 | G   | G (100%)  | A (20%)   | G (100%)   | G (100%)     |                                              |
| 104,230,649 | Intron 10 | C   | C (100%)  | T (17%)   | C (100%)   | C (100%)     |                                              |
| 104,230,635 | Intron 10 | A   | T (90%)   | T (100%)  | T (100%)   | T (100%)**   |                                              |
| 104,230,594 | Intron 10 | C   | C (100%)  | T (18%)   | C (100%)   | C (100%)     |                                              |
| 104,230,577 | Intron 10 | G   | A (3%)*   | G (100%)  | A (14%)    | G (100%)     |                                              |
| 104,230,548 | Intron 10 | C   | C (95%)   | C (100%)  | T (17%)    | C (100%)     |                                              |
| 104,230,496 | Intron 10 | G   | G (100%)  | A (14%)   | G (100%)   | G (100%)     |                                              |
| 104,230,422 | Intron 10 | G   | G (100%)  | A (18%)   | G (100%)   | A (8%)*      |                                              |
| 104,230,397 | Intron 10 | C   | C (100%)  | T (20%)   | C (100%)   | C (100%)     |                                              |
| 104,230,384 | Intron 10 | C   | C (100%)  | C (100%)  | T (17%)    | C (100%)     |                                              |
| 104,230,352 | Intron 10 | C   | C (100%)  | C (100%)  | T (12%)    | C (100%)     |                                              |

|             |                   |   |          |          |          |          |
|-------------|-------------------|---|----------|----------|----------|----------|
| 104,230,319 | Intron 10         | C | C (100%) | T (12%)  | C (100%) | C (100%) |
| 104,230,014 | Downstream region | G | G (100%) | G (100%) | A (30%)  | G (100%) |
| 104,229,887 | Downstream region | C | C (100%) | T (14%)  | C (100%) | C (100%) |
| 104,229,778 | Downstream region | G | G (100%) | A (8%)*  | A (15%)  | G (100%) |
| 104,229,768 | Downstream region | C | C (100%) | T (12%)  | T (7%)*  | C (100%) |
| 104,229,767 | Downstream region | C | C (100%) | C (100%) | T (13%)  | C (100%) |
| 104,229,761 | Downstream region | G | G (100%) | G (100%) | A (18%)  | G (100%) |
| 104,229,742 | Downstream region | G | G (100%) | A (13%)  | G (100%) | G (100%) |
| 104,229,617 | Downstream region | G | G (100%) | A (17%)  | G (100%) | G (100%) |
| 104,229,602 | Downstream region | C | C (100%) | T (25%)  | C (100%) | C (100%) |
| 104,229,591 | Downstream region | G | G (100%) | A (13%)  | G (100%) | G (100%) |
| 104,229,568 | Downstream region | C | C (100%) | T (5%)*  | T (18%)  | C (100%) |
| 104,229,563 | Downstream region | G | G (100%) | A (12%)  | G (100%) | G (100%) |
| 104,229,544 | Downstream region | C | C (100%) | T (11%)  | T (10%)* | C (100%) |
| 104,229,543 | Downstream region | C | C (100%) | T (11%)  | C (100%) | C (100%) |
| 104,229,502 | Downstream region | C | C (100%) | T (17%)  | T (8%)*  | C (100%) |

n.a.: not available; the variant frequency is referred to the percentage of the highlighted base in the sequenced ancient hominine genome, with\* frequency≤10% and \*\* counts<10. In light orange are underlined the variants fixed at 100% in modern human compared to ancient hominines.
