# Supplementary material for: A Catalog of Coding Sequence Variations in Salivary Proteins’ Genes Occurring during Recent Human Evolution
Source: MDPI journal article supplement (doi:10.3390/ijms241915010), 2023-10-09
Supplement: s1 [file s1]

Table S6. Nucleotide Substitutions in *HTN1* gene in introns and regulatory regions

| Genomic Coordinates (hg19) | Gene Region      | Modern human | Altai Neanderthal (Variant Frequency) | Chagyrskaya Neanderthal (Variant Frequency) | Vindija Neanderthal (Variant Frequency) | Denisovan (Variant Frequency) | Codon → Amino acid |
|----------------------------|------------------|--------------|---------------------------------------|---------------------------------------------|-----------------------------------------|-------------------------------|--------------------|
| 70,915,835                 | Upstream regions | G            | G (100%)                              | A (6%)*                                     | A (12%)                                 | A (3%)*                       |                    |
| 70,915,946                 | Upstream regions | A            | A (100%)                              | A (100%)                                    | G (14%)                                 | A (100%)                      |                    |
| 70,915,954                 | Upstream regions | G            | G (100%)                              | G (100%)                                    | A (12%)                                 | C (4%)*                       |                    |
| 70,915,975                 | Upstream regions | C            | C (100%)                              | T (12%)                                     | T (8%)*                                 | C (100%)                      |                    |
| 70,915,993                 | Upstream regions | C            | C (100%)                              | C (100%)                                    | T (16%)                                 | C (100%)                      |                    |
| 70,916,067                 | Upstream regions | A            | G (12%)                               | G (4%)*                                     | G (10%)*                                | A (100%)                      |                    |
| 70,916,151                 | 5'UTR            | G            | G (98%)                               | G (100%)                                    | A (11%)                                 | G (100%)                      |                    |
| 70,916,157                 | 5'UTR            | C            | T (4%)*                               | C (100%)                                    | T (12%)                                 | C (100%)                      |                    |
| 70,916,201                 | 5'UTR            | C            | C (100%)                              | T (14%)                                     | C (100%)                                | C (100%)                      |                    |
| 70,916,229                 | Intron 1         | C            | C (99%)                               | C (100%)                                    | T (12%)                                 | C (100%)                      |                    |
| 70,916,433                 | Intron 1         | T            | G (93%)                               | G (86%) **<br>A (14%) **                    | G (67%) **<br>A (33%) **                | T (100%)                      |                    |
| 70,916,454                 | Intron 1         | C            | C (100%)                              | C (100%)                                    | T (15%)                                 | C (100%)                      |                    |
| 70,916,507                 | Intron 1         | G            | G (97%)                               | A (5%)*                                     | A (15%)                                 | G (100%)                      |                    |
| 70,916,513                 | Intron 1         | G            | G (100%)                              | A (13%)                                     | G (100%)                                | G (100%)                      |                    |
| 70,916,527                 | Intron 1         | G            | A (100%)                              | A (100%)                                    | A (100%)**                              | A (100%)**                    |                    |
| 70,916,549                 | Intron 1         | G            | A (7%)*                               | A (7%)*                                     | A (15%)                                 | T (8%)*                       |                    |
| 70,916,629                 | Intron 1         | C            | C (100%)                              | T (4%)*                                     | T (11%)                                 | C (100%)                      |                    |
| 70,916,745                 | Intron 1         | C            | C (100%)                              | T (11%)                                     | C (100%)                                | C (100%)                      |                    |
| 70,916,801                 | Intron 1         | G            | G (100%)                              | G (100%)                                    | A (13%)                                 | G (100%)                      |                    |
| 70,916,810                 | Intron 1         | C            | T (2%)*                               | C (100%)                                    | T (10%)*                                | T (100%)                      |                    |
| 70,916,855                 | Intron 1         | C            | G (100%)                              | G (100%)                                    | G (100%)                                | G (100%)                      |                    |
| 70,916,970                 | Intron 1         | C            | C (100%)                              | T (13%)                                     | T (3%)*                                 | C (100%)                      |                    |
| 70,917,037                 | Intron 1         | G            | G (100%)                              | A (3%)*                                     | A (13%)                                 | G (100%)                      |                    |
| 70,917,063                 | Intron 1         | G            | G (100%)                              | A (13%)                                     | A (3%)*                                 | G (100%)                      |                    |
| 70,917,193                 | Intron 1         | G            | A (100%)                              | A (100%)                                    | A (100%)                                | A (100%)                      |                    |
| 70,917,298                 | Intron 1         | C            | C (100%)                              | C (94%)                                     | T (14%)                                 | C (100%)                      |                    |
| 70,917,390                 | Intron 1         | C            | C (100%)                              | T (11%)                                     | C (100%)                                | C (100%)                      |                    |
| 70,917,413                 | Intron 1         | T            | A (98%)                               | A (100%)                                    | A (100%)                                | A (100%)                      |                    |
| 70,917,415                 | Intron 1         | G            | G (100%)                              | A (11%)                                     | A (3%)*                                 | G (100%)                      |                    |
| 70,917,429                 | Intron 1         | A            | G (98%)                               | G (97%)                                     | G (100%)                                | G (100%)                      |                    |

|            |          |   |            |            |            |            |
|------------|----------|---|------------|------------|------------|------------|
| 70,917,485 | Intron 1 | G | A (2%)*    | G (100%)   | A (11%)    | G (100%)   |
| 70,917,487 | Intron 1 | G | G (100%)   | G (100%)   | A (16%)    | G (100%)   |
| 70,917,494 | Intron 1 | G | G (100%)   | A (11%)    | A (6%)*    | G (100%)   |
| 70,917,498 | Intron 1 | G | A (2%)*    | A (5%)*    | A (19%)    | G (100%)   |
| 70,917,669 | Intron 1 | A | C (100%)   | C (100%)   | C (100%)   | A (100%)   |
| 70,917,801 | Intron 1 | C | C (100%)   | C (100%)   | T (13%)    | C (100%)   |
| 70,917,152 | Intron 1 | C | C (100%)   | T (3%)*    | T (11%)    | C (100%)   |
| 70,917,227 | Intron 1 | C | C (100%)   | C (100%)   | T (17%)    | C (100%)   |
| 70,917,230 | Intron 1 | C | C (100%)   | T (11%)    | C (100%)   | C (100%)   |
| 70,917,401 | Intron 1 | C | C (100%)   | T (12%)    | C (100%)   | C (100%)   |
| 70,917,452 | Intron 1 | G | G (100%)   | A (15%)    | A (2%)*    | G (100%)   |
| 70,917,509 | Intron 1 | C | A (2%)*    | T (11%)    | T (9%)*    | T (3%)*    |
| 70,918,511 | Intron 1 | A | delA (15%) | delA (48%) | delA (32%) | delA (21%) |
| 70,918,512 | Intron 1 | A | delA (5%)* | delA (14%) | delA (11%) | delA (3%)* |
| 70,918,551 | Intron 1 | G | G (100%)   | A (4%)*    | A (15%)    | G (100%)   |
| 70,918,555 | Intron 1 | C | C (100%)   | T (10%)*   | T (15%)    | C (100%)   |
| 70,918,557 | Intron 1 | C | C (100%)   | C (100%)   | T (15%)    | C (100%)   |
| 70,918,559 | Intron 1 | C | T (2%)*    | C (100%)   | T (17%)    | C (100%)   |
| 70,918,620 | Intron 1 | G | A (2%)*    | A (14%)    | A (5%)*    | G (100%)   |
| 70,918,780 | Intron 1 | G | G (100%)   | A (3%)*    | A (11%)    | G (100%)   |
| 70,918,901 | Intron 2 | C | T (2%)*    | T (6%)*    | T (13%)    | C (100%)   |
| 70,918,978 | Intron 2 | G | G (100%)   | A (8%)*    | A (12%)    | G (100%)   |
| 70,918,980 | Intron 2 | G | G (100%)   | A (8%)*    | A (12%)    | G (100%)   |
| 70,918,984 | Intron 2 | C | C (100%)   | T (3%)*    | T (13%)    | C (97%)    |
| 70,919,320 | Intron 2 | A | C (100%)   | C (100%)   | C (100%)   | A (100%)   |
| 70,919,342 | Intron 2 | A | A (100%)   | A (100%)   | A (100%)   | G (100%)   |
| 70,919,353 | Intron 2 | G | A (2%)*    | A (14%)    | A (8%)*    | G (100%)   |
| 70,919,355 | Intron 2 | C | C (100%)   | T (3%)*    | T (13%)    | C (100%)   |
| 70,919,413 | Intron 2 | C | C (100%)   | T (4%)*    | T (11%)    | C (100%)   |
| 70,919,418 | Intron 2 | T | C (100%)   | C (100%)   | C (100%)   | T (100%)   |
| 70,919,448 | Intron 2 | C | C (100%)   | T (11%)    | C (100%)   | C (100%)   |
| 70,919,615 | Intron 2 | G | G (100%)   | A (11%)    | G (100%)   | G (100%)   |
| 70,919,739 | Intron 2 | A | G (95%)    | G (100%)   | G (97%)    | A (100%)   |
| 70,919,775 | Intron 2 | C | C (100%)   | T (13%)    | T (5%)*    | C (100%)   |
| 70,919,777 | Intron 2 | G | G (100%)   | A (4%)*    | A (14%)    | G (100%)   |

|            |          |     |                   |                   |                   |             |                                          |
|------------|----------|-----|-------------------|-------------------|-------------------|-------------|------------------------------------------|
| 70,919,796 | Intron 2 | T   | G (95%)           | G (100%)          | G (92%)           | T (100%)    |                                          |
| 70,919,872 | Intron 2 | C   | C (100%)          | C (100%)          | T (11%)           | C (100%)    |                                          |
| 70,920,060 | Intron 3 | G   | G (98%)           | A (11%)           | A (7%)*           | G (100%)    |                                          |
| 70,920,149 | Exon 4   | GGG | GG <u>A</u> (2%)* | GG <u>A</u> (5%)* | GG <u>A</u> (17%) | GGG (100%)  | GGG→G <sub>9</sub><br>GGA→G <sub>9</sub> |
| 70,920,408 | Intron 4 | A   | A (100%)          | A (97%)           | T (60%)           | A (100%)    |                                          |
| 70,920,473 | Intron 4 | G   | G (100%)          | A (10%)*          | A (14%)           | G (100%)    |                                          |
| 70,920,499 | Intron 4 | G   | A (5%)*           | A (3%)*           | A (12%)           | G (100%)    |                                          |
| 70,920,608 | Intron 4 | A   | G (95%)           | G (100%)          | G (100%)          | A (100%)    |                                          |
| 70,920,715 | Intron 4 | G   | G (100%)          | A (17%)           | G (100%)          | G (100%)    |                                          |
| 70,920,879 | Intron 4 | C   | C (100%)          | C (100%)          | T (11%)           | C (100%)    |                                          |
| 70,920,880 | Intron 4 | C   | C (100%)          | C (100%)          | T (11%)           | C (100%)    |                                          |
| 70,920,916 | Intron 4 | G   | G (100%)          | G (100%)          | A (11%)           | G (100%)    |                                          |
| 70,920,989 | Intron 4 | G   | A (2%)*           | G (96%)           | A (13%)           | G (100%)    |                                          |
| 70,921,018 | Intron 4 | C   | C (100%)          | C (100%)          | T (12%)           | C (100%)    |                                          |
| 70,921,122 | Intron 4 | G   | A (98%)           | A (100%)          | A (100%)          | G (100%)    |                                          |
| 70,921,164 | Intron 4 | T   | C (99%)           | C (90%)           | C (97%)           | C (100%)    |                                          |
| 70,921,174 | Intron 4 | C   | C (99%)           | T (8%)*           | T (15%)           | C (100%)    |                                          |
| 70,921,295 | 3'UTR    | G   | G (100%)          | A (14%)           | A (5%)*           | G (100%)    |                                          |
| 70,921,306 | 3'UTR    | G   | G (100%)          | G (96%)           | A (11%)           | G (100%)    |                                          |
| 70,921,319 | 3'UTR    | G   | G (100%)          | G (100%)          | A (11%)           | G (100%)    |                                          |
| 70,921,329 | Intron 5 | C   | C (100%)          | C (100%)          | T (11%)           | C (100%)    |                                          |
| 70,921,331 | Intron 5 | C   | C (100%)          | C (100%)          | T (11%)           | C (100%)    |                                          |
| 70,921,337 | Intron 5 | G   | A (98%)           | A (100%)          | A (100%)          | A (100%)    |                                          |
| 70,921,357 | Intron 5 | C   | C (100%)          | T (11%)           | T (10%)*          | C (100%)    |                                          |
| 70,921,393 | Intron 5 | C   | T (2%)*           | T (16%)           | C (100%)          | T (4%)*     |                                          |
| 70,921,419 | Intron 5 | C   | C (98%)           | C (100%)          | C (96%)           | A (100%)    |                                          |
| 70,921,450 | Intron 5 | G   | A (98%)           | A (100%)          | A (100%)          | A (100%)    |                                          |
| 70,921,525 | Intron 5 |     | InsT (92%)        | InsC (45%)        | InsC (44%)        | InsT (100%) |                                          |
| 70,921,537 | Intron 5 | G   | G (100%)          | G (100%)          | A (20%)           | G (100%)    |                                          |
| 70,921,564 | Intron 5 | C   | C (100%)          | T (20%)           | T (15%)           | C (100%)    |                                          |
| 70,921,603 | Intron 5 | C   | C (100%)          | T (5%)*           | T (11%)           | C (96%)     |                                          |
| 70,921,704 | Intron 5 | A   | G (93%)           | G (96%)           | G (67%)           | A (100%)    |                                          |
| 70,921,706 | Intron 5 | G   | G (98%)           | A (4%)*           | A (14%)           | G (100%)    |                                          |
| 70,921,707 | Intron 5 | G   | A (2%)*           | A (4%)*           | A (13%)           | G (100%)    |                                          |

|            |          |   |              |             |             |          |
|------------|----------|---|--------------|-------------|-------------|----------|
| 70,921,710 | Intron 5 | A | G (89%)      | G (89%)     | G (72%)     | A (100%) |
| 70,921,724 | Intron 5 | G | G (100%)     | G (96%)     | A (11%)     | G (100%) |
| 70,921,748 | Intron 5 | A | G (93%)      | G (81%)     | G (59%)     | A (100%) |
| 70,921,788 | Intron 5 | A | T (92%)      | T (81%)     | T (72%)     | A (100%) |
| 70,921,911 | Intron 5 | T | C (52%)      | C (49%)     | C (26%)     | T (100%) |
| 70,921,969 | Intron 5 | G | A (3%)*      | G (100%)    | A (13%)     | G (100%) |
| 70,922,002 | Intron 5 | A | G (100%)     | G (97%)     | G (93%)     | A (100%) |
| 70,922,084 | Intron 5 | C | C (100%)     | T (14%)     | C (100%)    | C (97%)  |
| 70,922,163 | Intron 5 | C | C (100%)     | C (100%)    | T (17%)     | C (100%) |
| 70,922,167 | Intron 5 | G | G (100%)     | G (100%)    | A (14%)     | G (100%) |
| 70,922,174 | Intron 5 | C | C (100%)     | T (11%)     | T (27%)     | T (4%)*  |
| 70,922,175 | Intron 5 | C | T (2%)*      | T (5%)*     | T (27%)     | C (100%) |
| 70,922,194 | Intron 5 | C | C (100%)     | C (100%)    | T (13%)     | C (100%) |
| 70,922,298 | Intron 5 | A | A (100%)     | A (100%)    | A (100%)    | G (43%)  |
| 70,922,383 | Intron 5 | C | T (2%)*      | T (3%)*     | T (11%)     | C (100%) |
| 70,922,567 | Intron 5 | C | C (100%)     | C (100%)    | T (12%)     | C (100%) |
| 70,922,656 | Intron 5 | G | G (100%)     | A (11%)     | A (7%)*     | A (3%)*  |
| 70,922,713 | Intron 5 | G | G (100%)     | A (12%)     | G (100%)    | G (100%) |
| 70,922,717 | Intron 5 | C | T (2%)*      | C (100%)    | T (14%)     | C (100%) |
| 70,922,892 | Intron 5 | G | A (2%)*      | A (13%)     | G (100%)    | G (100%) |
| 70,923,008 | Intron 5 | A | T (5%)*      | A (100%)    | T (12%)     | A (100%) |
| 70,923,009 | Intron 5 | A | C (5%)*      | A (100%)    | C (12%)     | A (100%) |
| 70,923,015 | Intron 5 | C | T (4%)*      | C (100%)    | T (12%)     | C (100%) |
| 70,923,066 | Intron 5 | G | G (100%)     | A (4%)*     | A (11%)     | G (100%) |
| 70,923,077 | Intron 5 | G | G (100%)     | A (5%)*     | A (13%)     | G (100%) |
| 70,923,088 | Intron 5 | C | C (100%)     | C (100%)    | T (14%)     | C (100%) |
| 70,923,101 | Intron 5 | G | G (100%)     | A (13%)     | G (100%)    | G (100%) |
| 70,923,105 | Intron 5 | G | G (100%)     | A (5%)*     | A (15%)     | G (100%) |
| 70,923,108 | Intron 5 | G | G (97%)      | A (4%)*     | A (17%)     | G (100%) |
| 70,923,123 | Intron 5 |   | InsTT (100%) | InsTT (46%) | InsTT (50%) | -        |
| 70,923,154 | Intron 5 | C | T (93%)      | T (90%)     | T (50%)     | C (100%) |
| 70,923,180 | Intron 5 | G | G (100%)     | G (100%)    | A (11%)     | G (100%) |
| 70,923,254 | Intron 5 | C | C (100%)     | T (5%)*     | T (13%)     | C (100%) |
| 70,923,276 | Intron 5 | C | C (100%)     | C (100%)    | T (12%)     | C (100%) |
| 70,923,278 | Intron 5 | C | C (100%)     | C (96%)     | T (12%)     | C (100%) |

|            |                    |   |          |          |          |          |
|------------|--------------------|---|----------|----------|----------|----------|
| 70,923,315 | Intron 5           | G | A (2%)*  | A (10%)* | A (12%)  | G (100%) |
| 70,923,371 | Intron 5           | C | T (4%)*  | C (100%) | T (13%)  | T (6%)*  |
| 70,923,380 | Intron 5           | C | T (100%) | T (100%) | T (100%) | C (100%) |
| 70,923,451 | Intron 5           | G | A (2%)*  | G (100%) | A (11%)  | G (100%) |
| 70,923,457 | Intron 5           | G | G (100%) | A (5%)*  | A (15%)  | G (100%) |
| 70,923,461 | Intron 5           | G | G (100%) | G (100%) | A (11%)  | G (100%) |
| 70,923,493 | Intron 5           | C | C (100%) | C (100%) | T (12%)  | C (100%) |
| 70,923,498 | Intron 5           | A | T (97%)  | T (100%) | T (100%) | A (100%) |
| 70,923,630 | Intron 5           | G | G (100%) | G (100%) | A (15%)  | G (100%) |
| 70,923,635 | Intron 5           | G | G (98%)  | A (3%)*  | A (11%)  | G (100%) |
| 70,923,826 | Intron 5           | C | C (99%)  | T (2%)*  | T (11%)  | C (100%) |
| 70,923,913 | Intron 5           | C | C (97%)  | T (7%)*  | T (12%)  | C (100%) |
| 70,923,922 | Intron 5           | C | C (100%) | C (100%) | T (11%)  | C (100%) |
| 70,923,931 | Intron 5           | T | G (98%)  | G (100%) | G (100%) | G (100%) |
| 70,923,932 | Intron 5           | A | C (98%)  | C (100%) | C (94%)  | A (100%) |
| 70,923,940 | Intron 5           | G | G (100%) | A (44%)  | A (13%)  | G (100%) |
| 70,923,943 | Intron 5           | G | G (100%) | G (100%) | A (17%)  | G (100%) |
| 70,924,022 | Intron 5           | G | G (100%) | G (100%) | A (16%)  | G (100%) |
| 70,924,034 | Intron 5           | G | G (100%) | A (4%)*  | A (11%)  | G (100%) |
| 70,924,036 | Intron 5           | G | G (98%)  | G (100%) | A (14%)  | G (100%) |
| 70,924,091 | Intron 5           | G | G (99%)  | A (11%)  | G (100%) | G (100%) |
| 70,924,131 | Intron 5           | C | C (100%) | T (11%)  | C (100%) | C (100%) |
| 70,924,200 | Intron 5           | C | C (100%) | T (12%)  | C (100%) | C (100%) |
| 70,924,204 | Intron 5           | C | C (100%) | T (8%)*  | T (15%)  | C (100%) |
| 70,924,250 | Intron 5           | G | A (2%)*  | A (11%)  | G (100%) | G (100%) |
| 70,924,345 | 3'UTR              | C | C (100%) | T (3%)*  | T (11%)  | C (100%) |
| 70,924,346 | 3'UTR              | C | C (100%) | T (3%)*  | T (26%)  | T (3%)*  |
| 70,924,358 | 3'UTR              | C | C (100%) | T (14%)  | C (100%) | C (100%) |
| 70,924,359 | 3'UTR              | C | C (100%) | T (15%)  | C (100%) | A (3%)*  |
| 70,924,419 | 3'UTR              | T | T (100%) | T (100%) | T (100%) | C (98%)  |
| 70,924,467 | 3'UTR              | G | G (100%) | A (14%)  | A (6%)*  | G (100%) |
| 70,924,568 | Downstream regions | T | C (98%)  | C (100%) | C (89%)  | T (100%) |
| 70,924,569 | Downstream regions | G | A (5%)*  | A (10%)* | A (12%)  | G (100%) |
| 70,924,574 | Downstream regions | C | C (100%) | T (11%)  | T (13%)  | C (100%) |

|                       |                    |     |              |              |              |            |
|-----------------------|--------------------|-----|--------------|--------------|--------------|------------|
| 70,924,576            | Downstream regions | C   | C (100%)     | C (100%)     | T (12%)      | C (100%)   |
| 70,924,584            | Downstream regions | C   | C (100%)     | T (13%)      | C (100%)     | C (100%)   |
| 70,924,585-70,924,587 | Downstream regions | TCT | delTCT (98%) | delTCT (74%) | delTCT (93%) | TCT (100%) |
| 70,924,658            | Downstream regions | G   | G (100%)     | A (13%)      | A (3%)*      | G (100%)   |
| 70,924,661            | Downstream regions | C   | C (100%)     | C (100%)     | T (12%)      | C (100%)   |
| 70,924,669            | Downstream regions | C   | T (80%)      | T (96%)      | T (76%)      | T (3%)*    |
| 70,924,671            | Downstream regions | T   | C (76%)      | C (90%)      | C (73%)      | T (100%)   |
| 70,924,735            | Downstream regions | G   | G (100%)     | G (100%)     | A (16%)      | G (100%)   |
| 70,924,736            | Downstream regions | G   | G (100%)     | A (13%)      | A (11%)      | G (100%)   |
| 70,924,747            | Downstream regions | C   | C (100%)     | C (100%)     | T (11%)      | C (100%)   |
| 70,924,758            | Downstream regions | C   | C (100%)     | T (13%)      | C (100%)     | C (100%)   |
| 70,924,767            | Downstream regions | C   | C (100%)     | C (100%)     | T (12%)      | C (100%)   |
| 70,924,794            | Downstream regions | G   | G (96%)      | A (11%)      | A (7%)*      | G (100%)   |
| 70,924,833            | Downstream regions | C   | delC (97%)   | delC (79%)   | delC (95%)   | C (100%)   |
| 70,924,852            | Downstream regions | G   | G (100%)     | A (11%)      | A (2%)*      | G (100%)   |
| 70,924,873            | Downstream regions | C   | C (100%)     | T (6%)*      | T (18%)      | C (96%)    |
| 70,924,894            | Downstream regions | G   | G (100%)     | G (100%)     | A (12%)      | G (100%)   |

n.a.: not available; the variant frequency is referred to the percentage of the highlighted base in the sequenced ancient hominine genome, with\* frequency≤10% and \*\* counts<10. In light orange are underlined the variants fixed at 100% in modern human compared to ancient hominines.
