# Supplementary material for: A Catalog of Coding Sequence Variations in Salivary Proteins’ Genes Occurring during Recent Human Evolution
Source: MDPI journal article supplement (doi:10.3390/ijms241915010), 2023-10-09
Supplement: s1 [file s1]

Table S13. Nucleotide Substitutions in *CST3* gene in introns and regulatory regions

| Genomic Coordinates (hg19) | Gene Region     | Modern human | Altai Neanderthal (Variant Frequency) | Chagyrskaya                     | Vindija                         | Denisovan (Variant Frequency) | Codon → amino acid                                 |
|----------------------------|-----------------|--------------|---------------------------------------|---------------------------------|---------------------------------|-------------------------------|----------------------------------------------------|
|                            |                 |              |                                       | Neanderthal (Variant Frequency) | Neanderthal (Variant Frequency) |                               |                                                    |
| 23,619,036                 | Upstream region | C            | C (100%)                              | C (100%)                        | T (17%)                         | C (100%)                      |                                                    |
| 23,619,022                 | Upstream region | C            | C (100%)                              | T (11%)**                       | T (22%)                         | C (100%)                      |                                                    |
| 23,619,003                 | Upstream region | C            | C (100%)                              | T (14%)                         | C (100%)                        | C (100%)                      |                                                    |
| 23,619,002                 | Upstream region | C            | C (100%)                              | T (14%)                         | C (100%)                        | C (100%)                      |                                                    |
| 23,618,976                 | Upstream region | C            | C (100%)                              | T (13%)                         | T (56%)**                       | C (100%)                      |                                                    |
| 23,618,938                 | Upstream region | C            | C (100%)                              | T (8%)*                         | T (18%)                         | C (100%)                      |                                                    |
| 23,618,934                 | Upstream region | C            | C (100%)                              | C (100%)                        | T (13%)                         | C (100%)                      |                                                    |
| 23,618,932                 | Upstream region | C            | C (100%)                              | T (20%)                         | T (20%)                         | C (100%)                      |                                                    |
| 23,618,846                 | Upstream region | C            | C (100%)                              | C (100%)                        | T (30%)                         | C (100%)**                    |                                                    |
| 23,618,833                 | Upstream region | C            | T (4%)*                               | T (20%)                         | C (100%)                        | C (100%)**                    |                                                    |
| 23,618,820                 | Upstream region | C            | C (100%)                              | T (17%)                         | T (8%)*                         | C (100%)                      |                                                    |
| 23,618,815                 | Upstream region | C            | C (100%)                              | T (20%)                         | T (20%)                         | C (100%)                      |                                                    |
| 23,618,803                 | Upstream region | C            | C (100%)                              | T (13%)                         | C (100%)                        | C (100%)                      |                                                    |
| 23,618,783                 | Upstream region | C            | C (100%)                              | C (100%)                        | T (13%)                         | C (100%)**                    |                                                    |
| 23,618,782                 | Upstream region | C            | C (100%)                              | C (100%)                        | T (13%)                         | C (100%)**                    |                                                    |
| 23,618,781                 | Upstream region | C            | C (100%)                              | C (100%)                        | T (13%)                         | C (100%)**                    |                                                    |
| 23,618,779                 | Upstream region | C            | C (100%)                              | C (100%)                        | T (21%)                         | C (100%)**                    |                                                    |
| 23,618,778                 | Upstream region | C            | C (100%)                              | C (100%)                        | T (15%)                         | C (100%)**                    |                                                    |
| 23,618,659                 | 5' UTR          | C            | C (100%)                              | T (18%)                         | C (100%)                        | C (100%)                      |                                                    |
| 23,618,656                 | 5' UTR          | C            | C (100%)                              | T (17%)                         | C (100%)                        | C (100%)                      |                                                    |
| 23,618,645                 | 5' UTR          | C            | C (100%)                              | C (100%)                        | T (12%)                         | C (100%)                      |                                                    |
| 23,618,644                 | 5' UTR          | C            | C (100%)                              | C (100%)                        | T (12%)                         | C (100%)                      |                                                    |
| 23,618,641                 | 5' UTR          | C            | C (100%)                              | T (15%)                         | C (100%)                        | C (100%)                      |                                                    |
| 23,618,633                 | 5' UTR          | G            | G (100%)                              | G (100%)                        | A (17%)                         | G (100%)                      |                                                    |
| 23,618,578                 | 5' UTR          | C            | C (100%)                              | T (13%)                         | T (18%)                         | C (93%)                       |                                                    |
| 23,618,532                 | 5' UTR          | G            | G (100%)                              | A (6%)*                         | A (15%)                         | G (100%)                      |                                                    |
| 23,618,516                 | 5' UTR          | G            | G (100%)                              | A (8%)*                         | A (14%)                         | G (100%)                      |                                                    |
| 23,618,491                 | Exon 1 (Signal) | CCC          | CCC (100%)                            | CCT (14%)**                     | CCT (18%)                       | CCC (100%)                    | GGG→G <sub>2(sp)</sub><br>GGA→G <sub>2(sp)</sub>   |
| 23,618,422                 | Exon 1 (Signal) | CCG          | CCG (100%)                            | CCA (11%)                       | CCA (11%)                       | CCG (100%)**                  | GGC→G <sub>25(sp)</sub><br>GGU→G <sub>25(sp)</sub> |

|            |          |     |            |            |            |              |                                            |
|------------|----------|-----|------------|------------|------------|--------------|--------------------------------------------|
| 23,618,407 | Exon 1   | TTC | TTC (100%) | TTT (12%)  | TTC (100%) | TTC (100%)** | AAG→K <sub>5</sub><br>AAA→K <sub>5</sub>   |
| 23,618,398 | Exon 1   | GCG | GCG (100%) | GCG (100%) | GCA (13%)  | GCG (100%)** | CGC→R <sub>8</sub><br>CGU→R <sub>8</sub>   |
| 23,618,397 | Exon 1   | GAT | GAT (100%) | GAT (100%) | AAT (13%)  | GAT (100%)** | CUA→L <sub>9</sub><br>UUA→L <sub>9</sub>   |
| 23,618,395 | Exon 1   | GAT | GAC (100%) | GAC (95%)  | GAC (11%)  | GAC (100%)** | CUA→L <sub>9</sub><br>CUG→L <sub>9</sub>   |
| 23,618,296 | Exon 1   | ATG | ATG (100%) | ATG (100%) | ATA (13%)  | ATG (100%)   | UAC→Y <sub>42</sub><br>UAU→Y <sub>42</sub> |
| 23,618,253 | Intron 1 | G   | G (100%)   | A (18%)    | G (100%)   | G (100%)**   |                                            |
| 23,618,231 | Intron 1 | C   | C (100%)   | C (100%)   | T (30%)    | C (100%)**   |                                            |
| 23,618,206 | Intron 1 | G   | G (100%)   | G (100%)   | A (18%)    | G (100%)**   |                                            |
| 23,618,193 | Intron 1 | C   | C (100%)   | T (8%)*    | T (13%)    | C (100%)     |                                            |
| 23,618,162 | Intron 1 | C   | C (100%)   | T (17%)    | C (100%)   | C (100%)     |                                            |
| 23,618,108 | Intron 1 | G   | G (100%)   | G (100%)   | A (11%)    | G (100%)     |                                            |
| 23,618,092 | Intron 1 | C   | C (100%)   | C (100%)   | T (13%)    | C (100%)     |                                            |
| 23,618,086 | Intron 1 | C   | C (100%)   | T (17%)    | T (13%)    | C (100%)     |                                            |
| 23,618,081 | Intron 1 | C   | C (100%)   | C (100%)   | T (18%)    | C (100%)     |                                            |
| 23,618,079 | Intron 1 | C   | T (3%)*    | C (100%)   | T (14%)    | C (100%)     |                                            |
| 23,618,040 | Intron 1 | C   | C (100%)   | T (14%)**  | T (14%)    | C (100%)     |                                            |
| 23,617,987 | Intron 1 | C   | T (4%)*    | C (100%)   | T (11%)    | C (100%)     |                                            |
| 23,617,982 | Intron 1 | C   | C (100%)   | T (15%)    | C (100%)   | C (100%)     |                                            |
| 23,617,972 | Intron 1 | C   | T (3%)*    | T (7%)*    | T (11%)    | C (100%)     |                                            |
| 23,617,948 | Intron 1 | C   | C (100%)   | T (12%)    | C (96%)    | C (100%)     |                                            |
| 23,617,907 | Intron 1 | C   | C (100%)   | T (18%)    | T (3%)*    | C (100%)     |                                            |
| 23,617,897 | Intron 1 | C   | C (100%)   | T (11%)    | C (100%)   | C (100%)     |                                            |
| 23,617,878 | Intron 1 | G   | G (100%)   | A (13%)    | G (97%)    | G (100%)     |                                            |
| 23,617,864 | Intron 1 | C   | C (100%)   | T (9%)*    | T (15%)    | C (100%)     |                                            |
| 23,617,647 | Intron 1 | C   | T (2%)*    | C (100%)   | T (12%)    | C (100%)     |                                            |
| 23,617,599 | Intron 1 | C   | C (100%)   | T (5%)*    | T (20%)    | C (100%)     |                                            |
| 23,617,463 | Intron 1 | G   | G (100%)   | G (100%)   | A (15%)    | G (100%)     |                                            |
| 23,617,438 | Intron 1 | G   | A (4%)*    | A (13%)    | A (6%)*    | A (6%)*      |                                            |
| 23,617,435 | Intron 1 | G   | C (100%)   | A (14%)    | G (100%)   | C (100%)     |                                            |
| 23,617,426 | Intron 1 | C   | C (100%)   | C (100%)   | T (14%)    | C (100%)     |                                            |
| 23,617,413 | Intron 1 | G   | G (100%)   | G (100%)   | A (17%)    | G (100%)     |                                            |
| 23,617,341 | Intron 1 | C   | C (100%)   | T (12%)    | T (10%)*   | C (100%)     |                                            |
| 23,617,322 | Intron 1 | C   | T (2%)*    | T (14%)    | T (4%)*    | C (100%)     |                                            |
| 23,617,261 | Intron 1 | G   | G (100%)   | A (12%)    | A (7%)*    | G (100%)     |                                            |

|            |          |   |          |          |          |          |
|------------|----------|---|----------|----------|----------|----------|
| 23,617,256 | Intron 1 | G | A (5%)*  | A (6%)*  | A (12%)  | G (100%) |
| 23,617,236 | Intron 1 | G | G (100%) | G (100%) | A (11%)  | G (100%) |
| 23,617,197 | Intron 1 | C | C (100%) | T (17%)  | T (4%)*  | C (100%) |
| 23,617,191 | Intron 1 | G | G (100%) | A (8%)*  | A (12%)  | A (7%)*  |
| 23,617,190 | Intron 1 | G | G (100%) | G (90%)  | A (13%)  | G (100%) |
| 23,617,189 | Intron 1 | G | G (100%) | G (100%) | A (13%)  | A (7%)*  |
| 23,617,188 | Intron 1 | G | G (100%) | G (100%) | A (13%)  | A (7%)*  |
| 23,617,160 | Intron 1 | G | G (100%) | G (100%) | A (20%)  | G (100%) |
| 23,617,143 | Intron 1 | G | G (100%) | G (100%) | A (17%)  | G (100%) |
| 23,617,138 | Intron 1 | G | G (100%) | G (100%) | A (18%)  | G (100%) |
| 23,617,121 | Intron 1 | C | C (100%) | C (100%) | T (15%)  | C (100%) |
| 23,617,094 | Intron 1 | G | G (100%) | A (13%)  | G (100%) | G (100%) |
| 23,617,084 | Intron 1 | G | G (100%) | A (13%)  | G (100%) | G (100%) |
| 23,617,037 | Intron 1 | G | A (2%)*  | G (100%) | A (11%)  | G (100%) |
| 23,617,007 | Intron 1 | G | G (100%) | G (100%) | A (10%)* | A (100%) |
| 23,617,002 | Intron 1 | C | C (100%) | T (14%)  | A (9%)*  | C (100%) |
| 23,617,001 | Intron 1 | C | C (100%) | T (7%)*  | T (18%)  | C (100%) |
| 23,616,980 | Intron 1 | C | C (100%) | C (100%) | T (13%)  | C (100%) |
| 23,616,978 | Intron 1 | G | G (100%) | G (100%) | A (12%)  | G (100%) |
| 23,616,970 | Intron 1 | C | T (3%)*  | C (100%) | T (12%)  | C (100%) |
| 23,616,940 | Intron 1 | C | T (2%)*  | T (4%)*  | T (13%)  | C (100%) |
| 23,616,914 | Intron 1 | G | G (100%) | A (13%)  | G (100%) | G (100%) |
| 23,616,876 | Intron 1 | C | C (100%) | C (100%) | T (11%)  | C (100%) |
| 23,616,862 | Intron 1 | G | A (3%)*  | A (12%)  | G (100%) | G (100%) |
| 23,616,844 | Intron 1 | G | G (100%) | A (14%)  | G (100%) | G (100%) |
| 23,616,835 | Intron 1 | C | C (100%) | C (100%) | T (13%)  | C (100%) |
| 23,616,822 | Intron 1 | G | A (100%) | A (100%) | A (100%) | G (100%) |
| 23,616,807 | Intron 1 | G | G (100%) | G (100%) | A (5%)*  | A (100%) |
| 23,616,712 | Intron 1 | G | G (100%) | G (100%) | A (11%)  | G (100%) |
| 23,616,645 | Intron 1 | C | C (97%)  | T (12%)  | C (100%) | C (100%) |
| 23,616,631 | Intron 1 | C | C (100%) | T (4%)*  | T (15%)  | C (100%) |
| 23,616,630 | Intron 1 | C | C (100%) | T (9%)*  | T (14%)  | C (100%) |
| 23,616,618 | Intron 1 | G | A (24%)  | A (12%)  | A (52%)  | G (100%) |
| 23,616,587 | Intron 1 | A | G (40%)  | G (34%)  | G (48%)  | G (39%)  |
| 23,616,585 | Intron 1 | A | C (41%)  | C (28%)  | C (46%)  | C (39%)  |

|            |          |             |                    |                   |                   |                   |                                            |
|------------|----------|-------------|--------------------|-------------------|-------------------|-------------------|--------------------------------------------|
| 23,616,581 | Intron 1 | C           | C (100%)           | C (100%)          | T (14%)           | C (100%)          |                                            |
| 23,616,577 | Intron 1 | G           | G (98%)            | A (11%)           | G (100%)          | G (100%)          |                                            |
| 23,616,552 | Intron 1 | G           | T (37%)            | T (37%)           | T (46%)           | T (41%)           |                                            |
| 23,616,492 | Intron 1 | A           | A (100%)           | A (100%)          | A (100%)          | C (83%)           |                                            |
| 23,616,469 | Intron 1 | T           | T (98%)            | T (100%)          | T (100%)          | C (97%)           |                                            |
| 23,616,425 | Intron 1 | C           | C (100%)           | T (16%)           | T (5%)*           | C (100%)          |                                            |
| 23,616,372 | Intron 1 | C           | T (1%)*            | T (4%)*           | T (11%)           | C (100%)          |                                            |
| 23,616,348 | Intron 1 | G           | G (100%)           | G (97%)           | A (17%)           | G (100%)          |                                            |
| 23,616,277 | Intron 1 | C           | C (100%)           | T (5%)*           | T (16%)           | C (100%)          |                                            |
| 23,616,270 | Intron 1 | G           | G (100%)           | A (28%)           | G (100%)          | G (100%)          |                                            |
| 23,616,256 | Intron 1 | C           | C (100%)           | C (100%)          | T (13%)           | C (100%)          |                                            |
| 23,616,250 | Intron 1 | C           | C (100%)           | T (11%)           | C (100%)          | C (100%)          |                                            |
| 23,616,206 | Intron 1 | G           | A (100%)           | A (100%)          | A (100%)          | A (100%)          |                                            |
| 23,616,167 | Intron 1 | C           | T (2%)*            | T (5%)*           | T (14%)           | C (100%)          |                                            |
| 23,616,150 | Intron 1 | C           | T (5%)*            | T (14%)           | T (8%)*           | C (100%)          |                                            |
| 23,616,144 | Intron 1 | G           | G (100%)           | A (14%)           | G (100%)          | G (100%)          |                                            |
| 23,616,083 | Intron 1 | G           | A (2%)*            | G (100%)          | A (15%)           | A (4%)*           |                                            |
| 23,616,051 | Intron 1 | T           | T (100%)           | T (100%)          | T (100%)          | C (100%)          |                                            |
| 23,616,008 | Intron 1 | C           | C (100%)           | C (100%)          | T (11%)           | C (100%)          |                                            |
| 23,615,936 | Exon 2   | GG <u>G</u> | GG <u>G</u> (100%) | GG <u>A</u> (5%)* | GG <u>A</u> (17%) | GG <u>G</u> (95%) | CCC→P <sub>78</sub><br>CCU→P <sub>78</sub> |
| 23,615,886 | Intron 2 | C           | T (3%)*            | C (100%)          | T (15%)           | C (100%)          |                                            |
| 23,615,883 | Intron 2 | G           | G (100%)           | A (10%)*          | A (13%)           | G (100%)          |                                            |
| 23,615,882 | Intron 2 | G           | G (100%)           | G (100%)          | A (13%)           | G (100%)          |                                            |
| 23,615,849 | Intron 2 | C           | C (100%)           | C (86%)           | G (11%)           | C (100%)          |                                            |
| 23,615,846 | Intron 2 | C           | C (100%)           | C (100%)          | T (18%)           | C (100%)          |                                            |
| 23,615,843 | Intron 2 | A           | A (100%)           | A (100%)          | C (21%)           | A (100%)          |                                            |
| 23,615,820 | Intron 2 | CA          | InsCACA<br>(35%)   | -                 | -                 | delCA (40%)       |                                            |
| 23,615,775 | Intron 2 | C           | C (100%)           | T (4%)*           | T (13%)           | C (100%)          |                                            |
| 23,615,772 | Intron 2 | G           | G (100%)           | A (11%)           | G (96%)           | G (100%)          |                                            |
| 23,615,739 | Intron 2 | C           | C (100%)           | T (13%)           | C (100%)          | C (100%)          |                                            |
| 23,615,728 | Intron 2 | C           | T (2%)*            | C (100%)          | T (13%)           | C (100%)          |                                            |
| 23,615,723 | Intron 2 | C           | C (100%)           | C (100%)          | T (20%)           | C (100%)          |                                            |
| 23,615,711 | Intron 2 | C           | T (2%)*            | T (4%)*           | T (14%)           | C (100%)          |                                            |
| 23,615,709 | Intron 2 | C           | C (100%)           | C (100%)          | T (13%)           | C (100%)          |                                            |

|            |          |   |          |          |          |          |
|------------|----------|---|----------|----------|----------|----------|
| 23,615,703 | Intron 2 | C | C (100%) | C (100%) | T (13%)  | C (100%) |
| 23,615,697 | Intron 2 | C | C (100%) | C (100%) | T (13%)  | C (100%) |
| 23,615,676 | Intron 2 | C | T (2%)*  | T (13%)  | T (17%)  | C (100%) |
| 23,615,674 | Intron 2 | C | C (100%) | T (7%)*  | T (18%)  | C (100%) |
| 23,615,673 | Intron 2 | C | C (100%) | T (13%)  | C (100%) | C (100%) |
| 23,615,672 | Intron 2 | C | C (100%) | T (13%)  | T (18%)  | C (100%) |
| 23,615,650 | Intron 2 | C | C (100%) | T (18%)  | C (100%) | C (100%) |
| 23,615,618 | Intron 2 | C | C (100%) | T (10%)* | T (15%)  | C (100%) |
| 23,615,617 | Intron 2 | C | C (100%) | T (20%)  | T (13%)  | C (95%)  |
| 23,615,615 | Intron 2 | C | C (100%) | T (30%)  | T (15%)  | C (100%) |
| 23,615,614 | Intron 2 | C | C (100%) | T (18%)  | T (5%)*  | C (100%) |
| 23,615,606 | Intron 2 | C | C (100%) | T (9%)*  | T (13%)  | C (100%) |
| 23,615,521 | Intron 2 | C | C (100%) | T (13%)  | T (7%)*  | C (100%) |
| 23,615,519 | Intron 2 | C | C (100%) | T (6%)*  | T (14%)  | C (100%) |
| 23,615,517 | Intron 2 | C | C (100%) | C (100%) | T (13%)  | C (100%) |
| 23,615,510 | Intron 2 | C | T (3%)*  | T (15%)  | T (5%)*  | C (100%) |
| 23,615,473 | Intron 2 | C | C (100%) | C (100%) | T (13%)  | C (100%) |
| 23,615,467 | Intron 2 | C | C (100%) | T (12%)  | T (5%)*  | C (100%) |
| 23,615,456 | Intron 2 | C | C (100%) | T (19%)  | C (100%) | C (100%) |
| 23,615,455 | Intron 2 | C | C (100%) | T (27%)  | C (100%) | C (100%) |
| 23,615,427 | Intron 2 | C | C (100%) | T (4%)*  | T (13%)  | C (100%) |
| 23,615,423 | Intron 2 | C | C (100%) | C (100%) | T (14%)  | T (4%)*  |
| 23,615,415 | Intron 2 | C | T (3%)*  | C (100%) | T (13%)  | C (100%) |
| 23,615,352 | Intron 2 | G | G (100%) | G (100%) | A (16%)  | G (100%) |
| 23,615,274 | Intron 2 | C | C (100%) | C (100%) | T (12%)  | C (100%) |
| 23,615,241 | Intron 2 | C | C (98%)  | T (11%)  | C (100%) | C (100%) |
| 23,615,234 | Intron 2 | G | G (100%) | A (21%)  | G (100%) | G (100%) |
| 23,615,227 | Intron 2 | G | G (100%) | G (100%) | A (11%)  | G (100%) |
| 23,615,226 | Intron 2 | G | G (100%) | G (100%) | A (11%)  | G (100%) |
| 23,615,221 | Intron 2 | G | G (100%) | A (13%)  | G (100%) | G (100%) |
| 23,615,201 | Intron 2 | C | C (100%) | C (100%) | T (12%)  | C (100%) |
| 23,615,200 | Intron 2 | C | C (100%) | T (7%)*  | T (13%)  | C (100%) |
| 23,615,145 | Intron 2 | G | G (100%) | A (17%)  | G (100%) | G (100%) |
| 23,615,129 | Intron 2 | G | G (96%)  | A (11%)  | G (100%) | G (100%) |
| 23,615,089 | Intron 2 | G | G (100%) | G (100%) | A (12%)  | G (100%) |

|            |          |             |                   |                    |                   |                   |                                              |
|------------|----------|-------------|-------------------|--------------------|-------------------|-------------------|----------------------------------------------|
| 23,615,087 | Intron 2 | G           | G (100%)          | G (100%)           | A (13%)           | G (100%)          |                                              |
| 23,615,085 | Intron 2 | G           | G (100%)          | A (11%)            | A (4%)*           | G (100%)          |                                              |
| 23,615,083 | Intron 2 | G           | G (100%)          | A (15%)            | A (4%)*           | G (100%)          |                                              |
| 23,615,082 | Intron 2 | G           | G (98%)           | A (15%)            | G (100%)          | G (100%)          |                                              |
| 23,615,064 | Intron 2 | G           | G (100%)          | A (11%)            | G (100%)          | A (4%)*           |                                              |
| 23,615,027 | Intron 2 | C           | C (100%)          | C (100%)           | T (12%)           | C (100%)          |                                              |
| 23,615,019 | Intron 2 | G           | G (100%)          | A (11%)            | G (100%)          | G (100%)          |                                              |
| 23,615,013 | Intron 2 | G           | G (100%)          | A (13%)            | A (7%)*           | G (100%)          |                                              |
| 23,614,997 | Intron 2 | G           | G (100%)          | G (100%)           | A (13%)           | G (100%)          |                                              |
| 23,614,987 | Intron 2 | C           | C (100%)          | T (11%)            | C (100%)          | C (100%)          |                                              |
| 23,614,977 | Intron 2 | C           | C (100%)          | T (13%)            | T (7%)*           | C (100%)          |                                              |
| 23,614,952 | Intron 2 | G           | G (100%)          | G (100%)**         | A (30%)           | G (100%)          |                                              |
| 23,614,870 | Intron 2 | C           | C (98%)           | C (100%)           | T (11%)           | C (100%)          |                                              |
| 23,614,825 | Intron 2 | C           | C (100%)          | T (11%)            | C (100%)          | C (100%)          |                                              |
| 23,614,803 | Intron 2 | G           | G (100%)          | G (100%)           | A (11%)           | G (100%)          |                                              |
| 23,614,786 | Intron 2 | G           | G (100%)          | A (18%)            | G (100%)          | G (100%)          |                                              |
| 23,614,771 | Intron 2 | C           | C (100%)          | T (9%)*            | T (14%)           | C (100%)**        |                                              |
| 23,614,767 | Intron 2 | C           | C (97%)           | C (100%)           | T (11%)           | C (100%)**        |                                              |
| 23,614,764 | Intron 2 | C           | C (100%)          | C (100%)           | T (11%)           | C (100%)**        |                                              |
| 23,614,725 | Intron 2 | G           | G (100%)          | A (9%)*            | A (15%)           | G (100%)          |                                              |
| 23,614,722 | Intron 2 | G           | G (100%)          | A (4%)*            | A (11%)           | G (100%)          |                                              |
| 23,614,718 | Intron 2 | G           | G (97%)           | A (12%)            | G (100%)          | G (100%)          |                                              |
| 23,614,712 | Intron 2 | G           | G (100%)          | G (100%)           | A (11%)           | G (100%)          |                                              |
| 23,614,652 | Intron 2 | G           | G (100%)          | G (100%)           | A (11%)           | G (100%)          |                                              |
| 23,614,610 | Exon 3   | AT <u>G</u> | AT <u>A</u> (3%)* | AT <u>G</u> (100%) | AT <u>A</u> (13%) | AT <u>A</u> (3%)* | UAC→Y <sub>102</sub><br>UAU→Y <sub>102</sub> |
| 23,614,550 | 3'UTR    | C           | C (100%)          | T (11%)            | T (10%)*          | C (100%)          |                                              |
| 23,614,531 | 3'UTR    | C           | C (100%)          | T (11%)            | T (6%)*           | C (100%)          |                                              |
| 23,614,520 | 3'UTR    | G           | G (100%)          | A (13%)            | G (100%)          | G (100%)          |                                              |
| 23,614,478 | 3'UTR    | G           | G (100%)          | A (11%)            | G (100%)          | G (100%)          |                                              |
| 23,614,437 | 3'UTR    | G           | G (100%)          | G (100%)           | A (14%)           | G (100%)          |                                              |
| 23,614,411 | 3'UTR    | G           | G (100%)          | A (11%)            | G (100%)          | G (100%)          |                                              |
| 23,614,366 | 3'UTR    | G           | G (100%)          | A (11%)            | G (100%)          | G (100%)          |                                              |
| 23,614,346 | 3'UTR    | G           | C (98%)           | C (100%)           | C (100%)**        | G (100%)          |                                              |
| 23,614,301 | 3'UTR    | C           | C (100%)          | T (11%)            | C (100%)          | C (100%)          |                                              |

|            |          |   |          |          |          |          |
|------------|----------|---|----------|----------|----------|----------|
| 23,614,292 | Intron 3 | G | G (100%) | G (100%) | A (15%)  | G (100%) |
| 23,614,278 | Intron 3 | C | C (100%) | T (5%)*  | T (11%)  | C (100%) |
| 23,614,217 | Intron 3 | G | G (100%) | A (15%)  | A (3%)*  | G (100%) |
| 23,614,214 | Intron 3 | C | C (97%)  | C (100%) | T (3%)*  | G (100%) |
| 23,614,176 | Intron 3 | G | G (100%) | A (5%)*  | G (100%) | A (100%) |
| 23,614,150 | Intron 3 | G | G (100%) | G (100%) | A (17%)  | G (100%) |
| 23,614,145 | Intron 3 | C | C (100%) | A (13%)  | C (100%) | C (100%) |
| 23,614,138 | Intron 3 | C | C (100%) | C (100%) | T (15%)  | C (100%) |
| 23,614,104 | Intron 3 | C | C (100%) | T (12%)  | C (100%) | C (100%) |
| 23,614,087 | Intron 3 | T | C (100%) | C (100%) | C (90%)  | C (90%)  |
| 23,614,052 | Intron 3 | C | T (3%)*  | C (100%) | T (13%)  | C (100%) |
| 23,613,951 | Intron 3 | C | C (100%) | T (4%)*  | T (25%)  | C (100%) |
| 23,613,950 | Intron 3 | C | C (100%) | C (100%) | T (25%)  | C (100%) |
| 23,613,948 | Intron 3 | C | C (100%) | T (14%)  | T (17%)  | C (100%) |
| 23,613,947 | Intron 3 | G | G (98%)  | G (100%) | A (15%)  | G (100%) |
| 23,613,924 | Intron 3 | C | C (100%) | T (4%)*  | T (11%)  | C (100%) |
| 23,613,799 | Intron 3 | G | G (100%) | G (100%) | A (11%)  | G (100%) |
| 23,613,798 | Intron 3 | C | C (98%)  | C (100%) | T (11%)  | C (100%) |
| 23,613,744 | Intron 3 | G | G (100%) | G (100%) | A (13%)  | G (100%) |
| 23,613,706 | Intron 3 | G | G (100%) | A (14%)  | G (100%) | G (100%) |
| 23,613,694 | Intron 3 | G | G (100%) | A (11%)  | G (100%) | G (100%) |
| 23,613,690 | Intron 3 | G | G (100%) | G (100%) | A (12%)  | A (100%) |
| 23,613,650 | Intron 3 | G | G (100%) | A (13%)  | A (3%)*  | G (100%) |
| 23,613,611 | Intron 3 | C | C (100%) | C (100%) | T (12%)  | C (100%) |
| 23,613,595 | Intron 3 | C | C (100%) | T (14%)  | C (100%) | C (100%) |
| 23,613,470 | Intron 3 | G | G (100%) | G (100%) | A (12%)  | G (100%) |
| 23,613,467 | Intron 3 | G | G (97%)  | G (100%) | A (12%)  | G (100%) |
| 23,613,418 | Intron 3 | G | A (2%)*  | A (5%)*  | A (11%)  | G (100%) |
| 23,613,416 | Intron 3 | G | G (100%) | G (100%) | A (19%)  | G (100%) |
| 23,613,397 | Intron 3 | C | C (100%) | C (100%) | T (11%)  | C (100%) |
| 23,613,395 | Intron 3 | C | T (2%)*  | T (13%)  | T (5%)*  | C (100%) |
| 23,613,362 | Intron 3 | C | C (100%) | T (12%)  | C (100%) | C (100%) |
| 23,613,361 | Intron 3 | G | G (100%) | A (13%)  | G (100%) | G (100%) |
| 23,613,358 | Intron 3 | G | G (100%) | G (100%) | A (11%)  | G (100%) |
| 23,613,357 | Intron 3 | G | G (100%) | A (6%)*  | A (16%)  | G (100%) |

|            |          |   |          |          |          |          |
|------------|----------|---|----------|----------|----------|----------|
| 23,613,325 | Intron 3 | G | G (100%) | A (5%)*  | A (12%)  | G (100%) |
| 23,613,324 | Intron 3 | G | G (100%) | A (4%)*  | A (16%)  | G (100%) |
| 23,613,291 | Intron 3 | C | C (100%) | T (15%)  | C (100%) | C (100%) |
| 23,613,267 | Intron 3 | G | G (100%) | A (4%)*  | A (12%)  | G (100%) |
| 23,613,240 | Intron 3 | G | G (100%) | G (100%) | A (11%)  | G (100%) |
| 23,613,232 | Intron 3 | G | G (97%)  | A (11%)  | A (4%)*  | G (100%) |
| 23,613,214 | Intron 3 | C | C (100%) | T (11%)  | C (100%) | C (100%) |
| 23,613,212 | Intron 3 | C | C (97%)  | C (100%) | T (13%)  | C (100%) |
| 23,613,207 | Intron 3 | G | A (3%)*  | A (11%)  | A (6%)*  | G (100%) |
| 23,613,202 | Intron 3 | C | T (3%)*  | C (100%) | T (11%)  | C (100%) |
| 23,613,200 | Intron 3 | C | C (100%) | T (13%)  | C (100%) | C (100%) |
| 23,613,191 | Intron 3 | C | C (100%) | C (100%) | T (11%)  | C (100%) |
| 23,613,187 | Intron 3 | C | C (94%)  | C (100%) | C (100%) | T (12%)  |
| 23,613,182 | Intron 3 | G | G (100%) | A (11%)  | A (4%)*  | G (100%) |
| 23,613,179 | Intron 3 | G | G (100%) | G (100%) | A (13%)  | G (100%) |
| 23,613,146 | Intron 3 | C | C (100%) | C (100%) | T (13%)  | C (100%) |
| 23,613,130 | Intron 3 | C | C (100%) | T (13%)  | C (100%) | C (100%) |
| 23,613,127 | Intron 3 | C | C (100%) | T (13%)  | C (100%) | C (100%) |
| 23,613,079 | Intron 3 | G | G (100%) | A (12%)  | G (100%) | G (100%) |
| 23,613,073 | Intron 3 | G | G (100%) | G (100%) | A (11%)  | G (100%) |
| 23,613,063 | Intron 3 | C | C (100%) | C (100%) | T (13%)  | C (100%) |
| 23,613,061 | Intron 3 | C | C (100%) | C (100%) | T (19%)  | C (100%) |
| 23,613,048 | Intron 3 | G | G (100%) | A (8%)*  | A (14%)  | G (100%) |
| 23,613,046 | Intron 3 | G | G (100%) | G (100%) | A (15%)  | G (100%) |
| 23,613,028 | Intron 3 | C | C (100%) | T (5%)*  | T (17%)  | C (93%)  |
| 23,613,005 | Intron 3 | C | C (100%) | T (4%)*  | T (13%)  | C (100%) |
| 23,613,002 | Intron 3 | C | C (100%) | T (4%)*  | T (21%)  | C (100%) |
| 23,612,996 | Intron 3 | C | C (100%) | T (9%)*  | T (15%)  | C (100%) |
| 23,612,995 | Intron 3 | C | T (3%)*  | T (4%)*  | T (15%)  | C (100%) |
| 23,612,989 | Intron 3 | C | C (100%) | T (11%)  | T (18%)  | T (6%)*  |
| 23,612,988 | Intron 3 | C | C (100%) | T (11%)  | T (8%)*  | C (94%)  |
| 23,612,982 | Intron 3 | C | C (96%)  | T (13%)  | T (7%)*  | C (100%) |
| 23,612,960 | Intron 3 | G | G (100%) | G (100%) | A (11%)  | G (100%) |
| 23,612,834 | Intron 3 | C | C (100%) | T (10%)* | T (12%)  | C (100%) |
| 23,612,833 | Intron 3 | G | G (100%) | G (100%) | A (16%)  | G (100%) |

|            |          |   |          |          |          |            |
|------------|----------|---|----------|----------|----------|------------|
| 23,612,820 | Intron 3 | C | C (100%) | T (15%)  | C (100%) | C (100%)   |
| 23,612,818 | Intron 3 | C | C (100%) | T (11%)  | C (100%) | C (100%)   |
| 23,612,796 | Intron 3 | G | G (100%) | A (11%)  | A (4%)*  | G (100%)   |
| 23,612,791 | Intron 3 | A | A (100%) | A (100%) | A (100%) | G (100%)   |
| 23,612,737 | Intron 3 | C | T (100%) | T (100%) | T (100%) | C (100%)   |
| 23,612,726 | Intron 3 | G | G (97%)  | A (11%)  | A (3%)*  | G (100%)   |
| 23,612,710 | Intron 3 | C | C (100%) | T (13%)  | T (3%)*  | C (100%)** |
| 23,612,676 | Intron 3 | G | G (100%) | A (13%)  | G (100%) | G (100%)   |
| 23,612,675 | Intron 3 | G | G (100%) | A (6%)*  | A (14%)  | G (100%)   |
| 23,612,661 | Intron 3 | C | T (3%)*  | C (100%) | T (13%)  | C (100%)   |
| 23,612,642 | Intron 3 | G | G (97%)  | A (11%)  | G (100%) | G (100%)   |
| 23,612,641 | Intron 3 | G | G (100%) | A (11%)  | G (100%) | G (100%)   |
| 23,612,633 | Intron 3 | G | G (97%)  | A (14%)  | A (4%)*  | G (100%)   |
| 23,612,631 | Intron 3 | G | G (97%)  | A (13%)  | G (100%) | A (4%)*    |
| 23,612,600 | Intron 3 | G | A (10%)* | G (100%) | A (10%)* | G (100%)   |
| 23,612,540 | Intron 3 | C | C (100%) | T (20%)  | T (8%)*  | C (100%)   |
| 23,612,460 | Intron 3 | C | C (100%) | T (4%)*  | T (13%)  | C (100%)   |
| 23,612,404 | Intron 3 | G | G (100%) | A (14%)  | A (4%)*  | G (100%)   |
| 23,612,373 | Intron 3 | C | C (100%) | T (7%)*  | T (12%)  | C (100%)   |
| 23,612,372 | Intron 3 | C | C (100%) | T (7%)*  | T (11%)  | C (100%)   |
| 23,612,305 | Intron 3 | A | A (100%) | A (100%) | A (100%) | G (100%)   |
| 23,612,296 | Intron 3 | C | C (100%) | T (11%)  | C (100%) | C (100%)   |
| 23,612,272 | Intron 3 | C | C (100%) | T (7%)*  | T (19%)  | C (100%)   |
| 23,612,258 | Intron 3 | G | G (100%) | A (12%)  | G (94%)  | G (100%)   |
| 23,612,239 | Intron 3 | C | C (97%)  | C (100%) | T (14%)  | C (100%)   |
| 23,612,229 | Intron 3 | G | G (100%) | G (100%) | A (14%)  | G (100%)   |
| 23,612,210 | Intron 3 | C | C (100%) | T (4%)*  | T (14%)  | C (100%)   |
| 23,612,202 | Intron 3 | C | C (100%) | T (11%)  | C (100%) | C (100%)   |
| 23,612,155 | Intron 3 | C | C (100%) | T (13%)  | T (7%)*  | C (100%)   |
| 23,612,144 | Intron 3 | G | G (100%) | A (13%)  | G (100%) | G (100%)   |
| 23,612,137 | Intron 3 | G | G (100%) | G (100%) | A (3%)*  | A (100%)   |
| 23,612,127 | Intron 3 | C | T (2%)*  | C (100%) | T (13%)  | T (9%)*    |
| 23,612,115 | Intron 3 | G | A (2%)*  | G (100%) | A (28%)  | G (100%)   |
| 23,612,110 | Intron 3 | C | C (100%) | T (4%)*  | T (13%)  | C (100%)   |
| 23,612,102 | Intron 3 | G | G (100%) | A (11%)  | A (12%)  | G (100%)   |

|            |          |   |            |                       |            |            |
|------------|----------|---|------------|-----------------------|------------|------------|
| 23,612,101 | Intron 3 | G | G (100%)   | G (100%)              | A (11%)    | G (100%)   |
| 23,612,100 | Intron 3 | G | G (100%)   | A (8%)*               | A (17%)    | G (100%)   |
| 23,612,094 | Intron 3 | G | G (100%)   | A (11%)               | A (6%)*    | G (100%)   |
| 23,612,093 | Intron 3 | G | G (100%)   | A (4%)*               | A (17%)    | G (100%)   |
| 23,612,092 | Intron 3 | G | G (100%)   | G (100%)              | A (16%)    | G (100%)   |
| 23,612,091 | Intron 3 | G | G (100%)   | G (100%)              | A (16%)    | G (100%)   |
| 23,612,032 | Intron 3 | G | A (4%)*    | A (13%)               | G (97%)    | G (100%)   |
| 23,611,954 | Intron 3 | C | T (3%)*    | C (100%)              | T (11%)    | C (100%)   |
| 23,611,931 | Intron 3 | C | T (2%)*    | T (5%)*               | T (17%)    | C (100%)   |
| 23,611,930 | Intron 3 | C | C (100%)   | T (14%)               | T (9%)*    | C (100%)   |
| 23,611,926 | Intron 3 | G | G (100%)   | G (100%)              | A (20%)    | G (100%)   |
| 23,611,802 | Intron 3 | T | T (100%)   | C (33%)               | T (100%)   | T (100%)   |
| 23,611,789 | Intron 3 | A | A (100%)   | A (96%)               | A (100%)   | G (100%)   |
| 23,611,730 | Intron 3 | C | T (2%)*    | T (6%)*               | T (11%)    | C (100%)   |
| 23,611,708 | Intron 3 | G | G (99%)    | A (13%)               | A (4%)*    | G (100%)   |
| 23,611,687 | Intron 3 | C | C (100%)   | T (13%)               | T (3%)*    | C (100%)   |
| 23,611,573 | Intron 3 | C | T (2%)*    | T (6%)*               | T (13%)    | C (100%)   |
| 23,611,485 | Intron 3 | C | C (100%)   | C (100%)              | T (13%)    | C (100%)   |
| 23,611,413 | Intron 3 | A | T (2%)*    | T (12%)               | A (100%)   | A (100%)   |
| 23,611,412 | Intron 3 | A | T (2%)*    | T (17%)               | T (3%)*    | T (3%)*    |
| 23,611,411 | Intron 3 | A | delA (27%) | delA (25%)            | delA (14%) | delA (3%)* |
| 23,611,410 | Intron 3 | A | delA (68%) | delA (44%)<br>T (25%) | delA (50%) | delA (26%) |
| 23,611,378 | Intron 3 | G | G (100%)   | A (17%)               | G (100%)   | G (100%)   |
| 23,611,354 | Intron 3 | G | G (97%)    | A (11%)               | G (100%)   | G (100%)   |
| 23,611,345 | Intron 3 | A | G (10%)*   | A (100%)              | A (100%)   | A (100%)   |
| 23,611,340 | Intron 3 | C | C (100%)   | T (5%)*               | T (11%)    | C (100%)   |
| 23,611,338 | Intron 3 | C | C (100%)   | T (11%)               | C (100%)   | C (100%)   |
| 23,611,329 | Intron 3 | C | C (100%)   | C (100%)              | T (11%)    | C (100%)   |
| 23,611,302 | Intron 3 | C | C (100%)   | T (11%)               | C (100%)   | C (100%)   |
| 23,611,218 | Intron 3 | G | A (2%)*    | G (100%)              | A (12%)    | G (100%)   |
| 23,611,188 | Intron 3 | G | G (98%)    | A (15%)               | A (7%)*    | G (100%)   |
| 23,611,181 | Intron 3 | G | G (98%)    | A (24%)               | A (8%)*    | T (100%)   |
| 23,611,161 | Intron 3 | G | G (100%)   | G (100%)              | A (13%)    | G (100%)   |
| 23,611,048 | Intron 3 | G | G (100%)   | A (9%)*               | A (13%)    | G (100%)   |

|            |          |   |          |          |          |              |
|------------|----------|---|----------|----------|----------|--------------|
| 23,610,943 | Intron 3 | C | C (100%) | T (13%)  | C (100%) | C (100%)     |
| 23,610,937 | Intron 3 | G | G (100%) | A (19%)  | G (100%) | G (100%)     |
| 23,610,918 | Intron 3 | G | G (100%) | A (5%)*  | A (19%)  | G (100%)     |
| 23,610,882 | Intron 3 | G | G (100%) | G (100%) | A (14%)  | G (100%)     |
| 23,610,872 | Intron 3 | C | C (100%) | C (100%) | T (21%)  | C (100%)     |
| 23,610,870 | Intron 3 | C | C (100%) | C (100%) | T (15%)  | C (100%)     |
| 23,610,783 | Intron 3 | G | G (98%)  | A (4%)*  | A (11%)  | G (100%)     |
| 23,610,680 | Intron 3 | C | C (100%) | C (100%) | T (11%)  | C (100%)     |
| 23,610,513 | Intron 3 | C | C (100%) | C (97%)  | T (12%)  | C (100%)     |
| 23,610,497 | Intron 3 | G | G (100%) | A (12%)  | A (11%)  | G (100%)     |
| 23,610,425 | Intron 3 | G | G (98%)  | G (100%) | A (13%)  | G (100%)     |
| 23,610,411 | Intron 3 | C | C (100%) | T (4%)*  | T (13%)  | C (100%)     |
| 23,610,399 | Intron 3 | G | G (100%) | A (11%)  | G (100%) | G (100%)     |
| 23,610,393 | Intron 3 | G | G (100%) | A (15%)  | A (6%)*  | G (100%)     |
| 23,610,389 | Intron 3 | G | G (100%) | A (11%)  | G (100%) | G (100%)     |
| 23,610,388 | Intron 3 | G | G (100%) | A (13%)  | A (7%)*  | G (100%)     |
| 23,610,386 | Intron 3 | G | G (100%) | A (7%)*  | A (13%)  | G (100%)     |
| 23,610,383 | Intron 3 | G | A (3%)*  | G (100%) | A (13%)  | G (100%)**   |
| 23,610,377 | Intron 3 | G | G (100%) | A (17%)  | A (13%)  | delG (90%)** |
| 23,610,374 | Intron 3 | G | G (100%) | G (92%)  | A (17%)  | G (100%)**   |
| 23,610,373 | Intron 3 | G | G (100%) | G (100%) | A (16%)  | G (100%)**   |
| 23,610,352 | Intron 3 | C | C (100%) | T (13%)  | C (100%) | C (100%)     |
| 23,610,348 | Intron 3 | G | G (96%)  | A (13%)  | A (6%)*  | G (100%)     |
| 23,610,347 | Intron 3 | G | G (100%) | A (21%)  | A (6%)*  | G (100%)     |
| 23,610,262 | Intron 3 | C | C (100%) | C (100%) | C (100%) | T (100%)     |
| 23,610,236 | Intron 3 | C | C (100%) | T (8%)*  | T (11%)  | C (100%)     |
| 23,610,229 | Intron 3 | G | G (100%) | A (4%)*  | A (12%)  | G (100%)     |
| 23,610,226 | Intron 3 | G | A (2%)*  | A (13%)  | A (13%)  | G (100%)     |
| 23,610,197 | Intron 3 | G | A (2%)*  | A (11%)  | A (9%)*  | G (100%)     |
| 23,610,192 | Intron 3 | G | G (100%) | A (5%)*  | A (15%)  | G (100%)     |
| 23,610,189 | Intron 3 | C | C (100%) | C (100%) | T (18%)  | C (100%)     |
| 23,610,182 | Intron 3 | C | C (100%) | C (100%) | T (14%)  | C (100%)     |
| 23,610,176 | Intron 3 | G | C (100%) | A (10%)* | A (20%)  | C (100%)     |
| 23,610,150 | Intron 3 | G | G (100%) | A (4%)*  | A (17%)  | G (100%)     |
| 23,610,035 | 3'UTR    | C | C (100%) | T (13%)  | T (6%)*  | C (100%)     |

|            |       |   |          |          |          |          |
|------------|-------|---|----------|----------|----------|----------|
| 23,610,022 | 3'UTR | G | G (100%) | G (100%) | A (12%)  | A (5%)*  |
| 23,609,992 | 3'UTR | G | G (100%) | G (100%) | A (15%)  | G (100%) |
| 23,609,989 | 3'UTR | G | G (100%) | G (96%)  | A (14%)  | G (100%) |
| 23,609,987 | 3'UTR | G | A (4%)*  | A (8%)*  | A (14%)  | G (100%) |
| 23,609,861 | 3'UTR | G | G (100%) | A (13%)  | A (7%)*  | G (100%) |
| 23,609,860 | 3'UTR | G | G (93%)  | A (20%)  | A (14%)  | G (100%) |
| 23,609,848 | 3'UTR | G | G (100%) | A (17%)  | A (11%)  | G (100%) |
| 23,609,846 | 3'UTR | G | G (100%) | A (11%)  | G (100%) | G (100%) |
| 23,609,839 | 3'UTR | G | G (100%) | A (18%)  | G (100%) | G (100%) |
| 23,609,832 | 3'UTR | G | G (100%) | A (11%)  | G (100%) | G (100%) |
| 23,609,814 | 3'UTR | G | G (100%) | G (100%) | A (11%)  | G (100%) |
| 23,609,813 | 3'UTR | G | G (100%) | G (100%) | A (15%)  | G (100%) |
| 23,609,812 | 3'UTR | G | G (100%) | G (100%) | A (11%)  | G (100%) |
| 23,609,799 | 3'UTR | G | G (100%) | A (14%)  | G (100%) | G (100%) |
| 23,609,753 | 3'UTR | G | G (100%) | A (5%)*  | A (13%)  | G (100%) |
| 23,609,750 | 3'UTR | G | G (100%) | A (13%)  | G (100%) | G (100%) |
| 23,609,749 | 3'UTR | G | G (100%) | A (13%)  | A (6%)*  | G (100%) |
| 23,609,748 | 3'UTR | G | G (100%) | A (4%)*  | A (13%)  | G (100%) |
| 23,609,600 | 3'UTR | C | C (100%) | C (100%) | T (13%)  | C (100%) |
| 23,609,599 | 3'UTR | C | C (100%) | T (8%)*  | T (19%)  | C (100%) |
| 23,609,533 | 3'UTR | C | C (100%) | C (100%) | T (17%)  | C (100%) |
| 23,609,509 | 3'UTR | C | C (100%) | C (100%) | T (12%)  | T (6%)*  |
| 23,609,480 | 3'UTR | G | A (4%)*  | A (4%)*  | A (17%)  | G (100%) |
| 23,609,477 | 3'UTR | C | T (4%)*  | T (12%)  | C (100%) | T (4%)*  |
| 23,609,462 | 3'UTR | C | C (100%) | T (14%)  | T (4%)*  | C (100%) |
| 23,609,345 | 3'UTR | C | T (2%)*  | T (4%)*  | T (12%)  | C (100%) |
| 23,609,237 | 3'UTR | G | G (100%) | G (100%) | A (13%)  | G (100%) |
| 23,609,177 | 3'UTR | G | G (100%) | A (4%)*  | A (13%)  | G (100%) |
| 23,609,104 | 3'UTR | G | G (100%) | A (10%)* | A (13%)  | G (100%) |
| 23,609,103 | 3'UTR | G | G (100%) | G (100%) | A (17%)  | G (100%) |
| 23,609,100 | 3'UTR | G | G (100%) | A (8%)*  | A (11%)  | G (100%) |
| 23,609,099 | 3'UTR | G | G (100%) | A (13%)  | A (5%)*  | G (100%) |
| 23,609,020 | 3'UTR | C | C (100%) | C (100%) | T (12%)  | C (100%) |
| 23,608,995 | 3'UTR | A | T (56%)  | T (52%)  | A (100%) | A (100%) |
| 23,608,899 | 3'UTR | G | A (2%)*  | A (14%)  | G (100%) | G (100%) |

|            |                   |   |            |                       |            |            |
|------------|-------------------|---|------------|-----------------------|------------|------------|
| 23,608,807 | 3'UTR             | G | G (100%)   | A (11%)               | G (100%)   | G (100%)   |
| 23,608,721 | 3'UTR             | G | G (100%)   | A (12%)               | G (100%)   | G (100%)   |
| 23,608,570 | 3'UTR             | T | T (100%)   | A (18%)               | T (100%)   | T (100%)   |
| 23,608,564 | 3'UTR             | T | delT (92%) | delT (53%)<br>G (14%) | delT (92%) | T (100%)   |
| 23,608,562 | 3'UTR             | G | G (100%)   | T (14%)               | A (2%)*    | G (100%)   |
| 23,608,218 | Downstream region | G | G (100%)   | A (14%)               | G (100%)   | G (100%)   |
| 23,608,217 | Downstream region | G | G (100%)   | A (11%)               | G (100%)   | G (100%)   |
| 23,608,213 | Downstream region | G | A (2%)*    | A (3%)*               | A (13%)    | G (100%)   |
| 23,608,210 | Downstream region | G | G (100%)   | A (11%)               | G (100%)   | G (100%)   |
| 23,608,053 | Downstream region | C | C (98%)    | T (11%)               | T (7%)*    | C (100%)   |
| 23,608,036 | Downstream region | G | G (100%)   | A (12%)               | A (13%)    | G (100%)   |
| 23,608,022 | Downstream region | G | A (2%)*    | G (100%)              | A (4%)*    | A (11%)    |
| 23,607,996 | Downstream region | G | A (2%)*    | G (100%)              | A (13%)    | G (100%)   |
| 23,607,829 | Downstream region | C | T (2%)*    | T (17%)               | C (99%)    | C (97%)    |
| 23,607,793 | Downstream region | G | G (100%)   | G (100%)              | A (15%)    | G (100%)   |
| 23,607,713 | Downstream region | C | C (100%)   | C (97%)               | T (53%)    | C (100%)   |
| 23,607,620 | Downstream region | C | C (100%)   | C (100%)              | T (14%)    | C (100%)   |
| 23,607,585 | Downstream region | T | C (94%)    | C (100%)              | C (97%)    | C (100%)   |
| 23,607,554 | Downstream region | G | A (2%)*    | G (100%)              | A (15%)    | G (100%)   |
| 23,607,536 | Downstream region | G | G (100%)   | A (10%)*              | A (16%)    | G (100%)   |
| 23,607,463 | Downstream region | G | G (100%)   | G (100%)              | A (12%)    | G (100%)   |
| 23,607,456 | Downstream region | G | G (100%)   | A (3%)*               | A (13%)    | G (100%)   |
| 23,607,379 | Downstream region | G | A (100%)   | A (100%)              | A (100%)   | A (100%)   |
| 23,607,309 | Downstream region | C | C (100%)   | T (5%)*               | T (12%)    | C (100%)   |
| 23,607,244 | Downstream region | C | C (100%)   | C (100%)              | G (41%)    | C (100%)   |
| 23,607,207 | Downstream region | C | C (100%)   | C (100%)              | T (13%)    | C (100%)   |
| 23,607,078 | Downstream region | C | C (100%)   | C (100%)              | T (11%)    | C (100%)   |
| 23,607,034 | Downstream region | C | C (100%)   | T (4%)*               | T (19%)    | C (100%)   |
| 23,607,027 | Downstream region | G | G (100%)   | A (4%)*               | A (12%)    | G (97%)    |
| 23,606,942 | Downstream region | A | A (100%)   | G (12%)               | A (100%)   | A (100%)   |
| 23,606,941 | Downstream region |   | InsG (97%) | InsG (82%)            | InsG (49%) | InsG (97%) |
| 23,606,918 | Downstream region | G | G (100%)   | A (14%)               | A (8%)*    | G (100%)   |

|                   |                      |          |                 |                |                 |                 |
|-------------------|----------------------|----------|-----------------|----------------|-----------------|-----------------|
| <b>23,606,896</b> | Downstream<br>region | <b>C</b> | <b>C (100%)</b> | <b>T (20%)</b> | <b>T (7%)*</b>  | <b>C (100%)</b> |
| <b>23,606,816</b> | Downstream<br>region | <b>G</b> | <b>A (48%)</b>  | <b>A (38%)</b> | <b>G (100%)</b> | <b>G (100%)</b> |

n.a.: not available; the variant frequency is referred to the percentage of the highlighted base in the sequenced ancient hominine genome, with\* frequency $\leq$ 10% and \*\* counts<10. In light orange are underlined the variants fixed at 100% in modern human compared to ancient hominines.
