# Supplementary material for: A Catalog of Coding Sequence Variations in Salivary Proteins’ Genes Occurring during Recent Human Evolution
Source: MDPI journal article supplement (doi:10.3390/ijms241915010), 2023-10-09
Supplement: s1 [file s1]

Table S16. Nucleotide Substitutions in *CSTA* gene in introns and regulatory regions

| Genomic Coordinates (hg19) | Gene Region      |            |                   | Chagyrskaya         | Vindija             | Denisova (Variant Frequency) | Codon → amino acid                         |
|----------------------------|------------------|------------|-------------------|---------------------|---------------------|------------------------------|--------------------------------------------|
|                            |                  |            |                   | (Variant Frequency) | (Variant Frequency) |                              |                                            |
| 122,043,603                | Upstream regions | C          | T (100%)          | T (100%)            | T (100%)            | T (100%)                     |                                            |
| 122,043,745                | Upstream regions | A          | delA (44%)        | A (100%)            | A (100%)            | A (100%)                     |                                            |
| 122,043,915                | Upstream regions | C          | C (100%)          | C (100%)            | T (13%)             | C (96%)                      |                                            |
| 122,043,921                | Upstream regions | C          | C (100%)          | T (4%)*             | T (19%)             | C (100%)                     |                                            |
| 122,043,922                | Upstream regions | C          | C (100%)          | T (9%)*             | T (13%)             | C (100%)                     |                                            |
| 122,043,924                | Upstream regions | C          | T (3%)*           | C (100%)            | T (13%)             | C (100%)                     |                                            |
| 122,043,947                | Upstream regions | G          | G (100%)          | A (4%)*             | A (12%)             | G (100%)                     |                                            |
| 122,043,969                | Upstream regions | G          | G (100%)          | A (14%)             | G (100%)            | G (100%)                     |                                            |
| 122,043,999                | Upstream regions | C          | C (100%)          | T (13%)             | C (97%)             | C (100%)                     |                                            |
| 122,044,000                | Upstream regions | C          | C (100%)          | T (12%)             | C (100%)            | C (100%)                     |                                            |
| 122,044,015                | 5' UTR           | G          | G (100%)          | G (100%)            | A (15%)             | G (100%)                     |                                            |
| 122,044,027                | 5' UTR           | T          | C (100%)          | C (96%)             | C (100%)            | T (100%)                     |                                            |
| 122,044,060                | 5' UTR           | T          | T (100%)          | T (100%)            | T (100%)            | C (100%)                     |                                            |
| 122,044,070                | 5' UTR           | C          | C (100%)          | T (16%)             | T (2%)*             | C (100%)                     |                                            |
| 122,044,134                | 5' UTR           | G          | G (100%)          | A (12%)             | G (100%)            | G (100%)                     |                                            |
| 122,044,205                | Exon 1           | <u>AAG</u> | <u>AAG</u> (100%) | <u>AAA</u> (11%)    | <u>AAG</u> (100%)   | <u>AAG</u> (100%)            | AAG→K <sub>22</sub><br>AAA→K <sub>22</sub> |
| 122,044,505                | Intron 1         | C          | C (100%)          | T (11%)             | T (2%)*             | C (100%)                     |                                            |
| 122,044,573                | Intron 1         | G          | G (100%)          | A (11%)             | A (4%)*             | G (100%)                     |                                            |
| 122,044,641                | Intron 1         | G          | G (100%)          | A (4%)*             | A (13%)             | G (100%)                     |                                            |
| 122,044,660                | Intron 1         | G          | G (100%)          | A (20%)             | A (3%)*             | G (100%)                     |                                            |
| 122,044,705                | Intron 1         | G          | G (100%)          | G (100%)            | A (15%)             | G (100%)                     |                                            |
| 122,044,728                | Intron 1         | A          | G (100%)          | G (100%)            | G (100%)            | G (100%)                     |                                            |
| 122,044,745                | Intron 1         | G          | G (100%)          | A (4%)*             | A (12%)             | G (100%)                     |                                            |
| 122,044,779                | Intron 1         | G          | A (97%)           | A (100%)            | A (100%)            | G (100%)                     |                                            |
| 122,044,828                | Intron 1         | G          | G (100%)          | G (97%)             | A (11%)             | G (100%)                     |                                            |
| 122,044,848-122,044,850    | Intron 1         | CTT        | CTT (100%)        | CTT (97%)           | CTT (100%)          | delCTT (97%)                 |                                            |
| 122,044,889                | Intron 1         | G          | G (100%)          | G (96%)             | A (11%)             | G (100%)                     |                                            |
| 122,044,920                | Intron 1         | C          | C (100%)          | C (100%)            | T (11%)             | C (100%)                     |                                            |
| 122,044,969                | Intron 1         | G          | A (2%)*           | G (100%)            | A (14%)             | G (97%)                      |                                            |

|             |          |   |            |            |            |            |
|-------------|----------|---|------------|------------|------------|------------|
| 122,044,991 | Intron 1 | G | G (100%)   | A (3%)*    | A (14%)    | G (100%)   |
| 122,045,178 | Intron 1 | C | C (100%)   | T (13%)    | C (100%)   | C (100%)   |
| 122,045,216 | Intron 1 | C | C (98%)    | T (11%)    | T (5%)*    | C (100%)   |
| 122,045,274 | Intron 1 | C | T (100%)   | T (100%)   | T (100%)   | T (100%)   |
| 122,045,618 | Intron 1 | C | T (2%)*    | T (15%)    | C (100%)   | C (100%)   |
| 122,045,651 | Intron 1 | C | T (100%)   | T (100%)   | T (100%)   | C (100%)   |
| 122,045,653 | Intron 1 | G | G (100%)   | A (3%)*    | A (12%)    | G (100%)   |
| 122,045,716 | Intron 1 | C | C (100%)   | T (3%)*    | T (13%)    | C (100%)   |
| 122,045,719 | Intron 1 | C | T (2%)*    | T (3%)*    | T (11%)    | C (100%)   |
| 122,045,744 | Intron 1 | C | T (3%)*    | T (12%)    | C (100%)   | C (100%)   |
| 122,045,800 | Intron 1 | G | G (100%)   | A (11%)    | G (100%)   | G (100%)   |
| 122,045,943 | Intron 1 | A | G (34%)    | G (31%)    | G (10%)*   | A (100%)   |
| 122,045,955 | Intron 1 | G | G (100%)   | G (100%)   | C (11%)    | C (3%)*    |
| 122,046,021 | Intron 1 | G | G (97%)    | A (4%)*    | A (11%)    | G (100%)   |
| 122,046,022 | Intron 1 | G | G (100%)   | A (11%)    | A (5%)*    | G (100%)   |
| 122,046,049 | Intron 1 | C | C (100%)   | T (11%)    | T (8%)*    | C (100%)   |
| 122,046,094 | Intron 1 | G | A (9%)*    | A (8%)*    | A (15%)    | A (16%)    |
| 122,046,099 | Intron 1 | A | G (60%)    | G (35%)    | G (32%)    | G (6%)*    |
| 122,046,103 | Intron 1 | G | A (10%)*   | A (18%)    | A (10%)*   | A (6%)*    |
| 122,046,105 | Intron 1 | A | G (2%)*    | G (11%)    | G (3%)*    | A (100%)   |
| 122,046,115 | Intron 1 | A | G (38%)    | G (23%)    | G (19%)    | G (26%)    |
| 122,046,237 | Intron 1 | G | A (34%)    | G (100%)   | A (3%)*    | G (100%)   |
| 122,046,375 | Intron 1 | C | C (91%)    | C (100%)** | T (24%)    | T (6%)*    |
| 122,046,376 | Intron 1 | A | C (5%)*    | A (87%)**  | C (14%)    | C (6%)*    |
| 122,046,484 | Intron 1 | G | G (100%)   | A (11%)    | G (100%)   | G (100%)   |
| 122,046,597 | Intron 1 | A | delA (94%) | delA (68%) | delA (86%) | delA (95%) |
| 122,046,607 | Intron 1 | C | C (100%)   | T (13%)    | T (3%)*    | C (100%)   |
| 122,046,627 | Intron 1 | C | C (100%)   | T (3%)*    | T (11%)    | C (100%)   |
| 122,046,647 | Intron 1 | G | G (100%)   | A (4%)*    | A (11%)    | G (100%)   |
| 122,046,850 | Intron 1 | C | C (100%)   | T (13%)    | C (100%)   | C (100%)   |
| 122,046,860 | Intron 1 | C | C (100%)   | C (100%)   | T (14%)    | C (100%)   |
| 122,046,888 | Intron 1 | G | G (100%)   | A (17%)    | A (5%)*    | G (100%)   |
| 122,046,914 | Intron 1 | C | C (94%)    | T (8%)*    | T (13%)    | T (4%)*    |
| 122,046,915 | Intron 1 | C | C (100%)   | T (8%)*    | T (16%)    | C (100%)   |
| 122,046,950 | Intron 1 | C | C (100%)   | T (14%)    | T (10%)*   | C (100%)   |

|             |          |   |            |              |            |                          |
|-------------|----------|---|------------|--------------|------------|--------------------------|
| 122,046,964 | Intron 1 | C | C (100%)   | T (5%)*      | T (13%)    | C (100%)                 |
| 122,047,111 | Intron 1 | G | G (100%)   | G (100%)     | A (13%)    | G (97%)                  |
| 122,047,205 | Intron 1 | C | C (95%)    | C (100%)     | C (100%)   | G (10%)*                 |
| 122,047,209 | Intron 1 | G | G (100%)   | G (100%)     | G (100%)   | A (53%)                  |
| 122,047,289 | Intron 1 | G | G (98%)    | G (100%)     | A (11%)    | G (100%)                 |
| 122,047,341 | Intron 1 | C | C (100%)   | C (92%)      | T (12%)    | C (100%)                 |
| 122,047,347 | Intron 1 | A | delA (16%) | delA (9%)*   | delA (8%)* | delA (30%)<br>InsA (30%) |
| 122,047,348 | Intron 1 | A | delA (11%) | delA (10%)** | delA (3%)* | delA (10%)*              |
| 122,047,367 | Intron 1 | G | A (13%)    | G (100%)**   | G (100%)   | G (100%)                 |
| 122,047,394 | Intron 1 | C | C (100%)   | T (12%)      | T (10%)*   | C (100%)                 |
| 122,047,419 | Intron 1 | C | C (100%)   | T (5%)*      | T (12%)    | C (100%)                 |
| 122,047,424 | Intron 1 | C | C (100%)   | C (100%)     | T (18%)    | C (100%)                 |
| 122,047,427 | Intron 1 | C | C (100%)   | T (4%)*      | T (11%)    | C (100%)                 |
| 122,047,528 | Intron 1 | G | G (100%)   | A (4%)*      | A (11%)    | G (100%)                 |
| 122,047,591 | Intron 1 | T | C (86%)    | C (68%)      | C (61%)    | T (100%)                 |
| 122,047,724 | Intron 1 | G | A (3%)*    | A (5%)*      | A (13%)    | G (100%)                 |
| 122,047,735 | Intron 1 | C | C (100%)   | C (95%)      | C (100%)   | A (90%)                  |
| 122,047,737 | Intron 1 | G | G (100%)   | A (52%)      | A (33%)    | G (100%)                 |
| 122,047,813 | Intron 1 | T | T (100%)   | T (100%)     | T (100%)   | A (92%)                  |
| 122,047,823 | Intron 1 | T | InsT (78%) | InsT (34%)   | InsT (65%) | delT (22%)               |
| 122,047,833 | Intron 1 | G | G (100%)   | T (27%)      | G (98%)    | G (100%)                 |
| 122,047,834 | Intron 1 | A | A (100%)   | G (11%)      | A (98%)    | A (100%)                 |
| 122,047,869 | Intron 1 | G | G (100%)   | A (11%)      | A (3%)*    | G (100%)                 |
| 122,047,997 | Intron 1 | T | C (2%)*    | T (100%)     | T (100%)   | C (25%)                  |
| 122,048,070 | Intron 1 | C | C (100%)   | T (12%)      | T (3%)*    | C (100%)                 |
| 122,048,094 | Intron 1 | T | T (100%)   | T (100%)     | T (100%)   | G (23%)                  |
| 122,048,101 | Intron 1 | C | C (100%)   | T (13%)      | T (2%)*    | C (100%)                 |
| 122,048,102 | Intron 1 | C | C (100%)   | T (13%)      | C (100%)   | T (4%)*                  |
| 122,048,132 | Intron 1 | C | C (100%)   | C (100%)     | C (100%)   | T (100%)                 |
| 122,048,149 | Intron 1 | G | A (5%)*    | G (100%)     | A (11%)    | A (7%)*                  |
| 122,048,153 | Intron 1 | G | G (100%)   | G (100%)     | A (13%)    | G (100%)                 |
| 122,048,159 | Intron 1 | G | G (100%)   | A (15%)      | G (100%)   | A (3%)*                  |
| 122,048,180 | Intron 1 | G | G (98%)    | A (10%)*     | A (12%)    | G (100%)                 |
| 122,048,192 | Intron 1 | G | G (100%)   | G (100%)     | A (12%)    | A (3%)*                  |

|             |          |   |            |            |            |          |
|-------------|----------|---|------------|------------|------------|----------|
| 122,048,253 | Intron 1 | T | T (100%)   | C (11%)    | T (97%)    | T (100%) |
| 122,048,254 | Intron 1 | C | C (100%)   | T (11%)    | T (6%)*    | C (100%) |
| 122,048,256 | Intron 1 | A | delA (96%) | delA (89%) | delA (94%) | A (100%) |
| 122,048,285 | Intron 1 | C | T (2%)*    | T (11%)    | T (4%)*    | C (100%) |
| 122,048,321 | Intron 1 | G | G (100%)   | A (12%)    | G (100%)   | G (100%) |
| 122,048,333 | Intron 1 | C | C (100%)   | T (12%)    | T (11%)    | C (100%) |
| 122,048,526 | Intron 1 | G | A (2%)*    | G (100%)   | A (14%)    | G (100%) |
| 122,048,686 | Intron 1 | C | C (100%)   | C (97%)    | T (11%)    | C (100%) |
| 122,048,748 | Intron 1 | G | G (100%)   | A (16%)    | A (10%)*   | G (100%) |
| 122,048,788 | Intron 1 | G | G (100%)   | A (11%)    | A (4%)*    | G (100%) |
| 122,048,790 | Intron 1 | C | C (100%)   | T (11%)    | C (100%)   | C (100%) |
| 122,048,826 | Intron 1 | G | G (100%)   | A (13%)    | A (12%)    | G (100%) |
| 122,048,893 | Intron 1 | C | C (100%)   | T (6%)*    | T (12%)    | C (100%) |
| 122,048,909 | Intron 1 | G | G (100%)   | A (4%)*    | A (13%)    | G (100%) |
| 122,048,912 | Intron 1 | G | G (100%)   | G (100%)   | A (14%)    | G (100%) |
| 122,048,916 | Intron 1 | G | G (100%)   | G (100%)   | A (17%)    | G (100%) |
| 122,048,939 | Intron 1 | G | G (99%)    | A (6%)*    | A (11%)    | G (100%) |
| 122,048,976 | Intron 1 | G | G (100%)   | G (100%)   | A (14%)    | G (100%) |
| 122,048,998 | Intron 1 | G | G (100%)   | A (7%)*    | A (11%)    | G (100%) |
| 122,049,000 | Intron 1 | G | G (100%)   | A (3%)*    | A (11%)    | G (100%) |
| 122,049,018 | Intron 1 | G | G (100%)   | A (12%)    | A (5%)*    | G (100%) |
| 122,049,027 | Intron 1 | G | G (100%)   | G (100%)   | A (13%)    | G (100%) |
| 122,049,047 | Intron 1 | C | C (100%)   | C (100%)   | T (22%)    | C (100%) |
| 122,049,049 | Intron 1 | C | C (100%)   | C (100%)   | T (11%)    | C (100%) |
| 122,049,242 | Intron 1 | C | C (100%)   | T (12%)    | C (100%)   | C (100%) |
| 122,049,260 | Intron 1 | G | G (100%)   | A (3%)*    | A (16%)    | G (100%) |
| 122,049,409 | Intron 1 | C | C (100%)   | C (100%)   | T (13%)    | C (100%) |
| 122,049,602 | Intron 1 | G | G (100%)   | A (4%)*    | A (11%)    | G (100%) |
| 122,049,635 | Intron 1 | G | A (3%)*    | A (15%)    | A (7%)*    | G (100%) |
| 122,049,655 | Intron 1 | C | T (2%)*    | T (3%)*    | T (13%)    | C (100%) |
| 122,049,699 | Intron 1 | C | T (2%)*    | C (100%)   | T (15%)    | C (100%) |
| 122,049,712 | Intron 1 | A | T (98%)    | T (100%)   | T (100%)   | A (100%) |
| 122,049,917 | Intron 1 | G | G (100%)   | A (3%)*    | A (11%)    | G (100%) |
| 122,049,931 | Intron 1 | C | T (2%)*    | C (100%)   | T (13%)    | C (100%) |

|                                     |          |             |                   |                   |                   |                          |
|-------------------------------------|----------|-------------|-------------------|-------------------|-------------------|--------------------------|
| <b>122,049,952-<br/>122,049,955</b> | Intron 1 | <b>ACAC</b> | <b>delAC (6%)</b> | <b>ACAC (95%)</b> | <b>ACAC (95%)</b> | <b>delACAC<br/>(24%)</b> |
| <b>122,049,957</b>                  | Intron 1 | <b>C</b>    | <b>C (98%)</b>    | <b>A (5%)*</b>    | <b>A (5%)*</b>    | <b>A (13%)</b>           |
| <b>122,050,067</b>                  | Intron 1 | <b>C</b>    | <b>C (100%)</b>   | <b>T (5%)*</b>    | <b>T (11%)</b>    | <b>C (100%)</b>          |
| <b>122,050,159</b>                  | Intron 1 | <b>C</b>    | <b>T (2%)*</b>    | <b>T (15%)</b>    | <b>C (100%)</b>   | <b>C (100%)</b>          |
| <b>122,050,228</b>                  | Intron 1 | <b>G</b>    | <b>G (100%)</b>   | <b>G (100%)</b>   | <b>A (11%)</b>    | <b>G (100%)</b>          |
| <b>122,050,264</b>                  | Intron 1 | <b>C</b>    | <b>C (100%)</b>   | <b>C (100%)</b>   | <b>T (13%)</b>    | <b>C (100%)</b>          |
| <b>122,050,267</b>                  | Intron 1 | <b>C</b>    | <b>C (100%)</b>   | <b>C (100%)</b>   | <b>T (13%)</b>    | <b>C (100%)</b>          |
| <b>122,050,297</b>                  | Intron 1 | <b>C</b>    | <b>C (100%)</b>   | <b>C (100%)</b>   | <b>T (13%)</b>    | <b>C (100%)</b>          |
| <b>122,050,299</b>                  | Intron 1 | <b>C</b>    | <b>C (100%)</b>   | <b>T (11%)</b>    | <b>T (4%)*</b>    | <b>C (100%)</b>          |
| <b>122,050,326</b>                  | Intron 1 | <b>G</b>    | <b>G (100%)</b>   | <b>A (14%)</b>    | <b>A (4%)*</b>    | <b>G (100%)</b>          |
| <b>122,050,342</b>                  | Intron 1 | <b>C</b>    | <b>C (100%)</b>   | <b>C (96%)</b>    | <b>T (21%)</b>    | <b>C (100%)</b>          |
| <b>122,050,343</b>                  | Intron 1 | <b>C</b>    | <b>C (100%)</b>   | <b>C (100%)</b>   | <b>T (16%)</b>    | <b>C (100%)</b>          |
| <b>122,050,404</b>                  | Intron 1 | <b>G</b>    | <b>A (2%)*</b>    | <b>A (13%)</b>    | <b>A (4%)*</b>    | <b>G (100%)</b>          |
| <b>122,050,530</b>                  | Intron 1 | <b>C</b>    | <b>C (100%)</b>   | <b>T (13%)</b>    | <b>T (3%)*</b>    | <b>C (100%)</b>          |
| <b>122,050,531</b>                  | Intron 1 | <b>C</b>    | <b>T (2%)*</b>    | <b>T (13%)</b>    | <b>T (8%)*</b>    | <b>C (100%)</b>          |
| <b>122,050,568</b>                  | Intron 1 | <b>C</b>    | <b>C (100%)</b>   | <b>C (100%)</b>   | <b>T (11%)</b>    | <b>C (100%)</b>          |
| <b>122,050,623</b>                  | Intron 1 | <b>T</b>    | <b>C (100%)</b>   | <b>C (97%)</b>    | <b>C (100%)</b>   | <b>C (100%)</b>          |
| <b>122,050,648</b>                  | Intron 1 | <b>C</b>    | <b>C (100%)</b>   | <b>T (5%)*</b>    | <b>T (13%)</b>    | <b>T (5%)*</b>           |
| <b>122,050,679</b>                  | Intron 1 | <b>C</b>    | <b>C (100%)</b>   | <b>C (100%)</b>   | <b>T (13%)</b>    | <b>C (100%)</b>          |
| <b>122,050,748</b>                  | Intron 1 | <b>G</b>    | <b>G (100%)</b>   | <b>A (13%)</b>    | <b>A (11%)</b>    | <b>G (100%)</b>          |
| <b>122,050,749</b>                  | Intron 1 | <b>G</b>    | <b>G (100%)</b>   | <b>A (23%)</b>    | <b>A (6%)*</b>    | <b>G (100%)</b>          |
| <b>122,050,750</b>                  | Intron 1 | <b>G</b>    | <b>G (100%)</b>   | <b>A (18%)</b>    | <b>A (6%)*</b>    | <b>G (100%)</b>          |
| <b>122,050,776</b>                  | Intron 1 | <b>C</b>    | <b>C (100%)</b>   | <b>T (4%)*</b>    | <b>T (11%)</b>    | <b>C (100%)</b>          |
| <b>122,050,777</b>                  | Intron 1 | <b>C</b>    | <b>C (100%)</b>   | <b>T (4%)*</b>    | <b>T (11%)</b>    | <b>C (100%)</b>          |
| <b>122,050,811</b>                  | Intron 1 | <b>C</b>    | <b>C (100%)</b>   | <b>C (100%)</b>   | <b>T (13%)</b>    | <b>C (100%)</b>          |
| <b>122,050,893</b>                  | Intron 1 | <b>G</b>    | <b>A (3%)*</b>    | <b>A (11%)</b>    | <b>G (100%)</b>   | <b>G (100%)</b>          |
| <b>122,050,925</b>                  | Intron 1 | <b>C</b>    | <b>C (100%)</b>   | <b>T (4%)*</b>    | <b>T (11%)</b>    | <b>C (100%)</b>          |
| <b>122,050,981</b>                  | Intron 1 | <b>G</b>    | <b>G (100%)</b>   | <b>A (3%)*</b>    | <b>A (11%)</b>    | <b>G (100%)</b>          |
| <b>122,050,995</b>                  | Intron 1 | <b>G</b>    | <b>G (97%)</b>    | <b>G (100%)</b>   | <b>A (11%)</b>    | <b>G (100%)</b>          |
| <b>122,050,996</b>                  | Intron 1 | <b>G</b>    | <b>G (100%)</b>   | <b>G (100%)</b>   | <b>A (19%)</b>    | <b>G (100%)</b>          |
| <b>122,051,080</b>                  | Intron 1 | <b>C</b>    | <b>C (100%)</b>   | <b>T (14%)</b>    | <b>C (100%)</b>   | <b>C (100%)</b>          |
| <b>122,051,082</b>                  | Intron 1 | <b>C</b>    | <b>C (100%)</b>   | <b>C (100%)</b>   | <b>T (13%)</b>    | <b>C (100%)</b>          |
| <b>122,051,084</b>                  | Intron 1 | <b>C</b>    | <b>T (3%)*</b>    | <b>C (100%)</b>   | <b>T (15%)</b>    | <b>C (100%)</b>          |
| <b>122,051,159</b>                  | Intron 1 | <b>C</b>    | <b>C (100%)</b>   | <b>T (5%)*</b>    | <b>T (5%)*</b>    | <b>T (40%)</b>           |

|             |          |   |          |          |          |          |
|-------------|----------|---|----------|----------|----------|----------|
| 122,051,276 | Intron 1 | C | C (100%) | T (4%)*  | T (19%)  | C (100%) |
| 122,051,278 | Intron 1 | C | C (100%) | C (100%) | T (13%)  | C (96%)  |
| 122,051,288 | Intron 1 | C | C (100%) | T (12%)  | T (8%)*  | C (100%) |
| 122,051,412 | Intron 1 | C | C (98%)  | T (5%)*  | T (13%)  | C (100%) |
| 122,051,449 | Intron 1 | C | C (100%) | C (100%) | T (15%)  | C (100%) |
| 122,051,450 | Intron 1 | C | C (100%) | T (11%)  | T (6%)*  | C (100%) |
| 122,051,556 | Intron 1 | C | C (100%) | T (4%)*  | T (15%)  | C (100%) |
| 122,051,595 | Intron 1 | C | C (100%) | T (11%)  | C (100%) | C (100%) |
| 122,051,603 | Intron 1 | C | T (4%)*  | T (11%)  | C (100%) | T (3%)*  |
| 122,051,623 | Intron 1 | G | G (100%) | G (100%) | A (11%)  | A (2%)*  |
| 122,051,631 | Intron 1 | C | C (100%) | T (5%)*  | T (11%)  | C (100%) |
| 122,051,667 | Intron 1 | C | C (100%) | T (13%)  | C (100%) | C (100%) |
| 122,051,681 | Intron 1 | C | T (4%)*  | T (12%)  | T (9%)*  | T (4%)*  |
| 122,051,687 | Intron 1 | C | C (100%) | T (11%)  | T (4%)*  | C (100%) |
| 122,051,797 | Intron 1 | C | C (100%) | T (13%)  | C (100%) | C (100%) |
| 122,051,805 | Intron 1 | C | C (100%) | T (13%)  | C (100%) | C (100%) |
| 122,051,821 | Intron 1 | C | C (100%) | T (16%)  | C (100%) | C (100%) |
| 122,051,918 | Intron 1 | G | G (100%) | A (14%)  | A (3%)*  | G (100%) |
| 122,051,959 | Intron 1 | C | T (2%)*  | T (11%)  | T (5%)*  | C (100%) |
| 122,052,118 | Intron 1 | G | G (100%) | G (96%)  | A (12%)  | G (100%) |
| 122,052,131 | Intron 1 | G | A (2%)*  | A (15%)  | A (4%)*  | G (100%) |
| 122,052,152 | Intron 1 | G | G (100%) | G (100%) | A (18%)  | G (100%) |
| 122,052,158 | Intron 1 | G | G (98%)  | G (100%) | A (11%)  | G (100%) |
| 122,052,177 | Intron 1 | G | G (100%) | A (3%)*  | A (14%)  | G (100%) |
| 122,052,228 | Intron 1 | G | G (95%)  | A (3%)*  | A (16%)  | G (100%) |
| 122,052,387 | Intron 1 | G | A (2%)*  | A (12%)  | A (4%)*  | A (4%)*  |
| 122,052,426 | Intron 1 | G | G (100%) | A (13%)  | A (3%)*  | G (100%) |
| 122,052,430 | Intron 1 | G | G (100%) | A (12%)  | G (100%) | A (5%)*  |
| 122,052,441 | Intron 1 | G | A (58%)  | A (46%)  | A (54%)  | G (100%) |
| 122,052,442 | Intron 1 | A | G (60%)  | G (50%)  | G (52%)  | A (100%) |
| 122,052,475 | Intron 1 | G | G (100%) | A (17%)  | A (11%)  | G (100%) |
| 122,052,515 | Intron 1 | G | A (2%)*  | A (19%)  | A (6%)*  | G (100%) |
| 122,052,529 | Intron 1 | G | G (100%) | A (14%)  | G (100%) | G (100%) |
| 122,052,541 | Intron 1 | G | A (26%)  | A (27%)  | A (23%)  | A (12%)  |
| 122,052,543 | Intron 1 | G | A (3%)*  | A (14%)  | A (7%)*  | A (8%)*  |

|             |          |   |            |                       |          |          |
|-------------|----------|---|------------|-----------------------|----------|----------|
| 122,052,545 | Intron 1 | G | A (2%)*    | G (100%)              | A (11%)  | G (100%) |
| 122,052,567 | Intron 1 | G | A (6%)*    | A (21%)               | A (8%)*  | G (100%) |
| 122,052,577 | Intron 1 | G | G (100%)   | A (13%)               | A (9%)*  | G (100%) |
| 122,052,579 | Intron 1 | A | A (100%)   | G (13%)               | G (76%)  | G (75%)  |
| 122,052,580 | Intron 1 | A | delA (17%) | delA (5%)*            | A (94%)  | A (96%)  |
| 122,052,581 | Intron 1 | G | delG (20%) | A (19%)<br>delG (6%)* | A (33%)  | A (87%)  |
| 122,052,582 | Intron 1 | A | G (31%)    | G (6%)*               | G (6%)*  | G (8%)*  |
| 122,052,583 | Intron 1 | G | A (13%)    | A (12%)               | A (3%)*  | G (100%) |
| 122,052,591 | Intron 1 | G | A (5%)*    | G (100%)              | A (16%)  | G (100%) |
| 122,052,594 | Intron 1 | A | G (12%)    | A (100%)              | A (100%) | A (100%) |
| 122,052,596 | Intron 1 | G | A (15%)    | G (100%)              | A (15%)  | A (4%)*  |
| 122,052,601 | Intron 1 | G | A (8%)*    | G (100%)              | A (11%)  | G (100%) |
| 122,052,606 | Intron 1 | G | G (100%)   | C (55%)               | C (23%)  | G (96%)  |
| 122,052,658 | Intron 1 | G | G (100%)   | A (13%)               | G (100%) | A (4%)*  |
| 122,052,659 | Intron 1 | G | G (100%)   | A (22%)               | A (5%)*  | G (100%) |
| 122,052,706 | Intron 1 | C | C (99%)    | T (5%)*               | T (14%)  | C (100%) |
| 122,052,741 | Intron 1 | G | G (100%)   | A (4%)*               | A (11%)  | G (100%) |
| 122,052,759 | Intron 1 | C | G (100%)   | G (97%)               | G (88%)  | G (100%) |
| 122,052,781 | Intron 1 | G | G (100%)   | A (13%)               | A (3%)*  | G (100%) |
| 122,052,801 | Intron 1 | G | G (97%)    | G (100%)              | A (11%)  | G (100%) |
| 122,052,802 | Intron 1 | G | G (100%)   | A (12%)               | A (4%)*  | G (100%) |
| 122,052,889 | Intron 1 | G | G (100%)   | A (12%)               | G (100%) | G (100%) |
| 122,052,901 | Intron 1 | G | G (100%)   | A (10%)*              | A (11%)  | G (100%) |
| 122,052,920 | Intron 1 | G | G (100%)   | A (11%)               | A (6%)*  | G (100%) |
| 122,052,931 | Intron 1 | C | T (2%)*    | T (7%)*               | T (16%)  | C (100%) |
| 122,053,120 | Intron 1 | C | C (100%)   | T (14%)               | T (2%)*  | C (97%)  |
| 122,053,157 | Intron 1 | T | T (100%)   | T (100%)              | C (36%)  | T (100%) |
| 122,053,163 | Intron 1 | C | C (100%)   | C (97%)               | T (15%)  | C (100%) |
| 122,053,175 | Intron 1 | C | C (100%)   | T (11%)               | C (100%) | C (100%) |
| 122,053,198 | Intron 1 | C | C (100%)   | T (11%)               | C (100%) | C (100%) |
| 122,053,226 | Intron 1 | C | C (100%)   | T (18%)               | C (100%) | C (100%) |
| 122,053,227 | Intron 1 | C | C (100%)   | T (11%)               | T (3%)*  | C (100%) |
| 122,053,249 | Intron 1 | G | A (100%)   | A (100%)              | A (100%) | A (100%) |
| 122,053,285 | Intron 1 | C | C (100%)   | T (21%)               | C (100%) | C (100%) |

|             |          |   |          |          |          |                  |
|-------------|----------|---|----------|----------|----------|------------------|
| 122,053,354 | Intron 1 | C | C (100%) | T (12%)  | T (5%)*  | C (100%)         |
| 122,053,404 | Intron 1 | G | G (100%) | G (96%)  | A (3%)*  | A (52%)          |
| 122,053,435 | Intron 1 | C | C (100%) | T (11%)  | C (100%) | C (100%)         |
| 122,053,575 | Intron 1 | G | A (2%)*  | A (11%)  | G (100%) | G (100%)         |
| 122,053,627 | Intron 1 | G | G (99%)  | A (11%)  | A (7%)*  | G (100%)         |
| 122,053,676 | Intron 1 | G | G (100%) | A (9%)*  | A (11%)  | G (100%)         |
| 122,053,723 | Intron 1 | C | C (100%) | C (100%) | T (11%)  | C (100%)         |
| 122,053,744 | Intron 1 | C | C (100%) | C (100%) | T (17%)  | C (100%)         |
| 122,053,756 | Intron 1 | G | A (3%)*  | G (100%) | A (14%)  | G (100%)         |
| 122,053,766 | Intron 1 | G | G (100%) | A (11%)  | G (100%) | G (100%)         |
| 122,053,815 | Intron 1 | G | G (100%) | A (13%)  | A (7%)*  | G (100%)         |
| 122,053,853 | Intron 1 | C | T (3%)*  | T (11%)  | C (100%) | C (100%)         |
| 122,053,892 | Intron 1 | G | G (100%) | A (11%)  | A (21%)  | G (100%)         |
| 122,053,948 | Intron 1 | G | G (100%) | G (100%) | A (12%)  | G (100%)         |
| 122,054,004 | Intron 1 | G | G (100%) | A (18%)  | A (6%)*  | G (100%)         |
| 122,054,006 | Intron 1 | C | T (2%)*  | T (21%)  | C (100%) | C (100%)         |
| 122,054,008 | Intron 1 | C | C (100%) | T (11%)  | C (100%) | C (100%)         |
| 122,054,131 | Intron 1 | C | T (2%)*  | C (100%) | T (13%)  | C (100%)         |
| 122,054,250 | Intron 1 | C | C (100%) | T (12%)  | T (11%)  | C (100%)         |
| 122,054,252 | Intron 1 | C | T (100%) | T (100%) | T (100%) | C (100%)         |
| 122,054,333 | Intron 1 | G | G (100%) | A (12%)  | A (8%)*  | G (100%)         |
| 122,054,350 | Intron 1 | G | A (100%) | A (100%) | A (100%) | A (100%)         |
| 122,054,461 | Intron 1 | T | T (100%) | T (100%) | T (100%) | InsTTAT<br>(57%) |
| 122,054,836 | Intron 1 | A | A (100%) | A (100%) | A (97%)  | InsGT (14%)      |
| 122,054,839 | Intron 1 | C | C (100%) | C (100%) | T (13%)  | C (100%)         |
| 122,054,929 | Intron 1 | A | A (100%) | G (64%)  | G (39%)  | A (100%)         |
| 122,054,943 | Intron 1 | G | G (100%) | A (3%)*  | A (12%)  | G (100%)         |
| 122,055,067 | Intron 1 | G | G (100%) | A (6%)*  | A (11%)  | G (100%)         |
| 122,055,124 | Intron 1 | C | C (100%) | T (13%)  | C (100%) | C (100%)         |
| 122,055,346 | Intron 1 | G | G (100%) | A (3%)*  | A (13%)  | G (100%)         |
| 122,055,360 | Intron 1 | C | C (100%) | T (11%)  | T (3%)*  | C (100%)         |
| 122,055,429 | Intron 1 | C | C (100%) | T (4%)*  | T (11%)  | C (100%)         |
| 122,055,432 | Intron 1 | C | C (100%) | T (13%)  | C (100%) | C (100%)         |
| 122,055,497 | Intron 1 | G | A (100%) | A (100%) | A (100%) | G (100%)         |



|             |          |   |            |            |            |            |
|-------------|----------|---|------------|------------|------------|------------|
| 122,055,498 | Intron 1 | C | C (98%)    | T (4%)*    | T (11%)    | C (100%)   |
| 122,055,541 | Intron 1 | G | G (100%)   | A (12%)    | A (6%)*    | G (100%)   |
| 122,055,670 | Intron 1 | C | T (2%)*    | C (100%)   | T (13%)    | C (100%)   |
| 122,055,689 | Intron 1 | C | C (100%)   | T (4%)*    | T (14%)    | C (100%)   |
| 122,055,728 | Intron 1 | C | C (100%)   | T (11%)    | T (20%)    | C (100%)   |
| 122,055,736 | Intron 1 | C | C (100%)   | C (100%)   | T (11%)    | C (100%)   |
| 122,055,820 | Intron 1 | T | T (100%)   | T (100%)   | C (56%)    | T (100%)   |
| 122,055,919 | Intron 1 | C | T (3%)*    | T (13%)    | T (3%)*    | C (100%)   |
| 122,055,965 | Intron 1 | C | C (100%)   | T (6%)*    | T (19%)    | C (100%)   |
| 122,056,120 | Intron 1 | C | C (100%)   | T (5%)*    | T (11%)    | C (100%)   |
| 122,056,176 | Intron 1 | G | G (100%)   | G (100%)   | A (12%)    | G (100%)   |
| 122,056,223 | Intron 1 | C | C (99%)    | T (11%)    | C (100%)   | C (100%)   |
| 122,056,309 | Intron 1 | G | G (100%)   | A (4%)*    | A (11%)    | G (100%)   |
| 122,056,330 | Intron 1 | G | G (100%)   | A (4%)*    | A (11%)    | G (100%)   |
| 122,056,333 | Intron 1 | C | C (100%)   | C (100%)   | T (11%)    | C (100%)   |
| 122,056,496 | Intron 2 | G | G (100%)   | G (100%)   | A (28%)    | G (100%)   |
| 122,056,508 | Intron 2 | C | C (100%)   | T (8%)*    | T (17%)    | C (97%)    |
| 122,056,510 | Intron 2 | C | C (100%)   | T (4%)*    | T (17%)    | C (100%)   |
| 122,056,591 | Intron 2 | G | G (100%)   | G (100%)   | A (16%)    | G (100%)   |
| 122,056,748 | Intron 2 | C | C (98%)    | T (11%)    | C (100%)   | C (100%)   |
| 122,056,824 | Intron 2 | G | A (3%)*    | A (12%)    | A (6%)*    | G (100%)   |
| 122,056,825 | Intron 2 | G | G (100%)   | A (13%)    | A (6%)*    | G (100%)   |
| 122,056,836 | Intron 2 | G | G (100%)   | A (4%)*    | A (11%)    | G (100%)   |
| 122,056,839 | Intron 2 | C | C (100%)   | T (11%)    | T (6%)*    | C (100%)   |
| 122,056,948 | Intron 2 | C | C (100%)   | T (13%)    | T (3%)*    | C (97%)    |
| 122,056,982 | Intron 2 | C | C (100%)   | T (12%)    | T (7%)*    | T (3%)*    |
| 122,057,024 | Intron 2 | G | G (100%)   | A (12%)    | A (3%)*    | G (100%)   |
| 122,057,084 | Intron 2 | A | InsA (93%) | InsA (80%) | InsA (84%) | A (100%)   |
| 122,057,090 | Intron 2 | T | T (100%)   | A (11%)    | T (97%)    | T (100%)   |
| 122,057,110 | Intron 2 | G | G (100%)   | G (100%)   | A (11%)    | G (100%)   |
| 122,057,257 | Intron 2 | C | C (100%)   | C (96%)    | T (15%)    | C (100%)   |
| 122,057,343 | Intron 2 | C | T (4%)*    | T (14%)    | C (100%)   | C (100%)   |
| 122,057,347 | Intron 2 | A | delA (51%) | delA (83%) | delA (50%) | delA (47%) |
| 122,057,348 | Intron 2 | A | delA (19%) | delA (38%) | delA (30%) | delA (30%) |
| 122,057,349 | Intron 2 | A | delA (7%)* | delA (15%) | delA (6%)* | delA (13%) |

|             |          |   |          |          |          |            |
|-------------|----------|---|----------|----------|----------|------------|
| 122,057,381 | Intron 2 | G | G (100%) | G (100%) | A (14%)  | G (100%)   |
| 122,057,408 | Intron 2 | C | C (100%) | C (95%)  | T (14%)  | C (100%)   |
| 122,057,483 | Intron 2 | G | G (95%)  | A (14%)  | A (5%)*  | G (100%)   |
| 122,057,624 | Intron 2 | C | C (99%)  | T (4%)*  | T (14%)  | C (100%)   |
| 122,057,682 | Intron 2 | C | C (98%)  | T (12%)  | T (9%)*  | C (100%)   |
| 122,057,690 | Intron 2 | C | C (100%) | T (12%)  | C (100%) | C (100%)   |
| 122,057,705 | Intron 2 | G | A (2%)*  | A (12%)  | A (8%)*  | G (100%)   |
| 122,057,748 | Intron 2 | T | T (100%) | T (100%) | A (65%)  | T (100%)   |
| 122,057,767 | Intron 2 | G | G (100%) | G (100%) | A (11%)  | G (95%)    |
| 122,057,769 | Intron 2 | C | C (100%) | C (100%) | T (18%)  | C (100%)   |
| 122,057,787 | Intron 2 | C | C (100%) | C (96%)  | T (12%)  | delC (18%) |
| 122,057,788 | Intron 2 | T | T (94%)  | T (96%)  | T (98%)  | delT (18%) |
| 122,057,789 | Intron 2 | C | C (98%)  | T (4%)*  | T (11%)  | C (100%)   |
| 122,057,793 | Intron 2 | C | C (100%) | C (100%) | T (14%)  | C (100%)   |
| 122,057,795 | Intron 2 | C | C (100%) | C (100%) | T (14%)  | C (100%)   |
| 122,057,810 | Intron 2 | C | C (100%) | T (13%)  | C (100%) | C (100%)   |
| 122,057,918 | Intron 2 | T | C (97%)  | C (97%)  | C (100%) | T (100%)   |
| 122,058,016 | Intron 2 | G | G (100%) | A (3%)*  | A (11%)  | G (100%)   |
| 122,058,076 | Intron 2 | C | C (100%) | T (12%)  | C (100%) | C (100%)   |
| 122,058,122 | Intron 2 | C | T (3%)*  | T (12%)  | T (3%)*  | C (100%)   |
| 122,058,194 | Intron 2 | G | G (100%) | A (12%)  | G (100%) | G (100%)   |
| 122,058,195 | Intron 2 | G | G (97%)  | A (12%)  | A (3%)*  | G (100%)   |
| 122,058,264 | Intron 2 | G | G (100%) | G (100%) | A (11%)  | G (100%)   |
| 122,058,285 | Intron 2 | G | G (100%) | A (11%)  | A (4%)*  | G (100%)   |
| 122,058,318 | Intron 2 | G | G (100%) | G (100%) | A (13%)  | G (100%)   |
| 122,058,389 | Intron 2 | C | C (100%) | C (100%) | T (12%)  | C (100%)   |
| 122,058,481 | Intron 2 | C | T (2%)*  | T (4%)*  | T (11%)  | C (100%)   |
| 122,058,579 | Intron 2 | G | G (100%) | G (100%) | A (11%)  | G (100%)   |
| 122,058,624 | Intron 2 | C | C (100%) | T (12%)  | C (100%) | C (100%)   |
| 122,058,637 | Intron 2 | G | G (100%) | A (7%)*  | A (14%)  | G (100%)   |
| 122,058,638 | Intron 2 | G | G (100%) | G (100%) | A (20%)  | G (100%)   |
| 122,058,646 | Intron 2 | G | G (100%) | G (100%) | A (12%)  | G (100%)   |
| 122,058,658 | Intron 2 | C | T (3%)*  | C (100%) | T (12%)  | C (100%)   |
| 122,058,660 | Intron 2 | C | C (100%) | T (14%)  | T (5%)*  | C (100%)   |
| 122,058,724 | Intron 2 | G | G (100%) | A (11%)  | A (4%)*  | G (100%)   |

|             |          |            |                    |                    |                           |                    |                                            |
|-------------|----------|------------|--------------------|--------------------|---------------------------|--------------------|--------------------------------------------|
| 122,059,006 | Intron 2 | G          | G (100%)           | G (100%)           | A (11%)                   | G (100%)           |                                            |
| 122,059,070 | Intron 2 | C          | C (98%)            | T (11%)            | T (2%)*                   | C (100%)           |                                            |
| 122,059,175 | Intron 2 | G          | A (2%)*            | A (42%)            | A (3%)*                   | G (100%)           |                                            |
| 122,059,239 | Intron 2 | C          | C (98%)            | T (3%)*            | T (11%)                   | C (100%)           |                                            |
| 122,059,445 | Intron 2 | C          | C (100%)           | C (100%)           | T (13%)                   | C (100%)           |                                            |
| 122,059,447 | Intron 2 | G          | G (100%)           | G (100%)           | A (13%)                   | G (100%)           |                                            |
| 122,059,456 | Intron 2 | C          | C (100%)           | T (4%)*            | T (13%)                   | C (100%)           |                                            |
| 122,059,474 | Intron 2 | G          | G (97%)            | A (24%)            | G (100%)                  | G (100%)           |                                            |
| 122,059,475 | Intron 2 | G          | A (3%)*            | A (11%)            | G (100%)                  | G (100%)           |                                            |
| 122,059,491 | Intron 2 | C          | C (100%)           | T (18%)            | C (100%)                  | C (100%)           |                                            |
| 122,059,495 | Intron 2 | G          | A (3%)*            | G (95%)            | A (14%)                   | G (100%)           |                                            |
| 122,059,664 | Intron 2 | C          | C (100%)           | C (100%)           | T (13%)                   | C (100%)           |                                            |
| 122,059,761 | Intron 2 | C          | T (2%)*            | T (11%)            | T (12%)                   | C (100%)           |                                            |
| 122,059,792 | Intron 2 | T          | delT (63%)         | delT (44%)         | delT (54%)                | delT (61%)         |                                            |
| 122,059,807 | Intron 2 | A          | A (100%)           | T (13%)            | T (3%)*                   | A (100%)           |                                            |
| 122,059,809 | Intron 2 | G          | G (100%)           | A (18%)            | G (100%)                  | A (6%)*            |                                            |
| 122,059,815 | Intron 2 | C          | C (100%)           | A (6%)*            | A (13%)                   | C (97%)            |                                            |
| 122,059,911 | Intron 2 | C          | C (99%)            | T (3%)*            | T (14%)                   | C (100%)           |                                            |
| 122,060,031 | Intron 2 | C          | C (100%)           | T (11%)            | C (100%)                  | C (100%)           |                                            |
| 122,060,032 | Intron 2 | C          | T (3%)*            | T (11%)            | C (100%)                  | C (100%)           |                                            |
| 122,060,063 | Intron 2 | C          | C (100%)           | T (15%)            | C (100%)                  | C (100%)           |                                            |
| 122,060,085 | Intron 2 | G          | G (100%)           | G (100%)           | A (13%)                   | G (100%)           |                                            |
| 122,060,173 | Intron 2 | G          | G (100%)           | A (3%)*            | A (11%)                   | G (100%)           |                                            |
| 122,060,372 | Exon 3   | <u>TAC</u> | T <u>A</u> C(100%) | T <u>A</u> C(100%) | T <u>A</u> <u>T</u> (12%) | T <u>A</u> C(100%) | UAC→Y <sub>85</sub><br>UAU→Y <sub>85</sub> |
| 122,060,639 | 3' UTR   | T          | T (100%)           | T (100%)           | T (100%)                  | C (48%)            |                                            |
| 122,060,653 | 3' UTR   | G          | A (96%)            | A (100%)           | A (100%)                  | G (100%)           |                                            |
| 122,060,654 | 3' UTR   | C          | C (100%)           | T (4%)*            | T (14%)                   | C (100%)           |                                            |
| 122,060,678 | 3' UTR   | G          | G (100%)           | A (13%)            | G (100%)                  | G (100%)           |                                            |
| 122,060,686 | 3' UTR   | C          | C (100%)           | C (100%)           | T (17%)                   | C (100%)           |                                            |
| 122,060,690 | 3' UTR   | C          | C (100%)           | T (12%)            | T (6%)*                   | C (100%)           |                                            |
| 122,060,692 | 3' UTR   | C          | C (100%)           | T (6%)*            | T (14%)                   | C (100%)           |                                            |
| 122,060,697 | 3' UTR   | C          | C (100%)           | C (100%)           | T (13%)                   | C (100%)           |                                            |
| 122,060,706 | 3' UTR   | G          | G (100%)           | A (13%)            | A (4%)*                   | G (100%)           |                                            |
| 122,060,741 | 3' UTR   | G          | G (100%)           | G (96%)            | A (13%)                   | G (96%)            |                                            |

|             |                    |   |            |            |                          |                          |
|-------------|--------------------|---|------------|------------|--------------------------|--------------------------|
| 122,060,823 | Downstream regions | G | G (100%)   | A (11%)    | A (6%)*                  | G (100%)                 |
| 122,060,825 | Downstream regions | G | G (100%)   | A (11%)    | A (6%)*                  | G (100%)                 |
| 122,060,827 | Downstream regions | G | G (100%)   | G (100%)   | A (13%)                  | G (100%)                 |
| 122,060,831 | Downstream regions | G | G (100%)   | A (13%)    | G (100%)                 | G (100%)                 |
| 122,060,839 | Downstream regions | G | A (32%)    | A (38%)    | A (43%)                  | G (100%)                 |
| 122,060,848 | Downstream regions | T | C (22%)    | C (13%)**  | C (13%)                  | T (100%)                 |
| 122,060,849 | Downstream regions | A | T (28%)    | T (13%)**  | T (22%)                  | A (100%)                 |
| 122,060,850 | Downstream regions | C | T (28%)    | T (25%)**  | T (10%)*                 | T (27%)                  |
| 122,060,870 | Downstream regions | T | T (91%)    | C (20%)    | T (100%)                 | T (100%)                 |
| 122,060,874 | Downstream regions | G | A (5%)*    | G (100%)** | G (100%)                 | A (18%)                  |
| 122,060,895 | Downstream regions | C | T (2%)*    | T (11%)    | T (3%)*                  | C (100%)                 |
| 122,060,974 | Downstream regions | C | C (100%)   | C (100%)   | T (7%)*                  | T (18%)                  |
| 122,060,978 | Downstream regions | C | C (100%)   | T (3%)*    | T (4%)*                  | T (13%)                  |
| 122,061,011 | Downstream regions | G | A (35%)    | A (4%)*    | G (100%)                 | G (100%)                 |
| 122,061,152 | Downstream regions | T | C (98%)    | C (90%)    | C (88%)                  | C (100%)                 |
| 122,061,182 | Downstream regions | C | T (1%)*    | T (13%)    | T (3%)*                  | C (100%)                 |
| 122,061,198 | Downstream regions | A | delA (6%)* | delA (16%) | InsA (26%)<br>delA (6%)* | InsA (7%)*<br>delA (2%)* |

n.a.: not available; the variant frequency is referred to the percentage of the highlighted base in the sequenced ancient hominine genome, with\* frequency≤10% and \*\* counts<10. In light orange are underlined the variants fixed at 100% in modern human compared to ancient hominines.
