# Supplementary material for: A Catalog of Coding Sequence Variations in Salivary Proteins’ Genes Occurring during Recent Human Evolution
Source: MDPI journal article supplement (doi:10.3390/ijms241915010), 2023-10-09
Supplement: s1 [file s1]

Table S17. Nucleotide Substitutions in *CSTB* gene in introns and regulatory regions

| Genomic Coordinates (hg19) | Gene Region      | Modern human | Altai Neanderthal (Variant Frequency) | Chagyrskaya Neanderthal (Variant Frequency) | Vindija Neanderthal (Variant Frequency) | Denisovan (Variant Frequency) | Codon → amino acid |
|----------------------------|------------------|--------------|---------------------------------------|---------------------------------------------|-----------------------------------------|-------------------------------|--------------------|
| 45,196,797                 | Upstream regions | G            | G (100%)                              | A (11%)                                     | G (100%)                                | G (100%)                      |                    |
| 45,196,795                 | Upstream regions | G            | G (100%)                              | A (5%)*                                     | A (11%)                                 | G (100%)                      |                    |
| 45,196,777                 | Upstream regions | G            | G (100%)                              | A (11%)                                     | A (8%)*                                 | G (100%)                      |                    |
| 45,196,773                 | Upstream regions | G            | G (100%)                              | A (12%)                                     | G (100%)                                | G (100%)                      |                    |
| 45,196,771                 | Upstream regions | G            | G (100%)                              | A (18%)                                     | G (100%)                                | G (100%)                      |                    |
| 45,196,766                 | Upstream regions | G            | G (100%)                              | G (100%)                                    | A (15%)                                 | G (100%)                      |                    |
| 45,196,739                 | Upstream regions | G            | G (100%)                              | A (20%)                                     | G (100%)                                | G (100%)**                    |                    |
| 45,196,724                 | Upstream regions | G            | G (100%)                              | A (14%)**                                   | A (13%)                                 | G (100%)**                    |                    |
| 45,196,712                 | Upstream regions | G            | G (100%)                              | G (98%)                                     | A (17%)                                 | G (100%)                      |                    |
| 45,196,691                 | Upstream regions | G            | G (100%)                              | G (100%)                                    | A (11%)                                 | G (100%)                      |                    |
| 45,196,667                 | Upstream regions | C            | T (4%)*                               | T (13%)                                     | C (100%)                                | C (100%)                      |                    |
| 45,196,641                 | Upstream regions | C            | C (100%)                              | C (100%)                                    | T (13%)                                 | C (100%)                      |                    |
| 45,196,634                 | Upstream regions | G            | G (100%)                              | G (100%)                                    | A (29%)                                 | G (100%)**                    |                    |
| 45,196,633                 | Upstream regions | G            | G (100%)                              | A (18%)                                     | A (7%)*                                 | G (100%)                      |                    |
| 45,196,614                 | Upstream regions | G            | G (100%)                              | G (100%)                                    | A (17%)                                 | G (100%)                      |                    |
| 45,196,603                 | Upstream regions | G            | G (100%)                              | G (100%)                                    | A (17%)                                 | G (100%)                      |                    |
| 45,196,599                 | Upstream regions | G            | G (100%)                              | G (100%)                                    | A (15%)                                 | G (100%)                      |                    |
| 45,196,567                 | Upstream regions | G            | G (100%)                              | G (100%)                                    | A (18%)                                 | G (100%)                      |                    |
| 45,196,566                 | Upstream regions | G            | G (95%)                               | G (100%)                                    | A (17%)                                 | G (100%)                      |                    |
| 45,196,494                 | Upstream regions | G            | G (100%)                              | A (23%)                                     | G (100%)                                | G (100%)**                    |                    |
| 45,196,374                 | Upstream regions | C            | C (100%)                              | C (86%)**                                   | T (15%)                                 | C (100%)**                    |                    |
| 45,196,372                 | Upstream regions | C            | C (100%)                              | T (14%)**                                   | T (17%)                                 | C (100%)**                    |                    |
| 45,196,362                 | Upstream regions | A            | G (100%)                              | G (100%)**                                  | G (89%)**                               | G (100%)**                    |                    |
| 45,196,341                 | Upstream regions | G            | G (100%)                              | A (10%)*                                    | A (13%)                                 | G (100%)**                    |                    |
| 45,196,329                 | Upstream regions | G            | G (100%)                              | G (67%)**                                   | A (11%)                                 | G (100%)**                    |                    |
| 45,196,303                 | Upstream regions | G            | G (100%)                              | G (100%)                                    | A (15%)                                 | G (100%)                      |                    |
| 45,196,267                 | Upstream regions | G            | G (100%)                              | G (100%)                                    | A (20%)                                 | G (100%)                      |                    |
| 45,196,210                 | 5' UTR           | C            | C (100%)                              | C (100%)                                    | T (18%)                                 | C (100%)                      |                    |

|            |          |     |            |            |           |            |                                          |
|------------|----------|-----|------------|------------|-----------|------------|------------------------------------------|
| 45,196,198 | 5' UTR   | G   | G (100%)   | G (100%)   | A (20%)   | G (100%)   |                                          |
| 45,196,182 | 5' UTR   | G   | G (100%)   | G (100%)   | A (27%)   | G (100%)   |                                          |
| 45,196,181 | 5' UTR   | G   | G (100%)   | G (100%)   | A (23%)   | G (100%)   |                                          |
| 45,196,180 | 5' UTR   | G   | G (100%)   | G (100%)   | A (13%)   | G (100%)   |                                          |
| 45,196,139 | Exon 1   | CCC | CCC (100%) | CCC (100%) | CCT (14%) | CCC (100%) | GGG→G <sub>4</sub><br>GGA→G <sub>4</sub> |
| 45,196,078 | Intron 1 | C   | C (100%)   | T (8%)*    | T (11%)   | C (100%)** |                                          |
| 45,196,040 | Intron 1 | C   | C (100%)   | T (8%)*    | T (12%)   | C (100%)** |                                          |
| 45,196,034 | Intron 1 | C   | C (100%)   | T (14%)    | C (100%)  | C (100%)** |                                          |
| 45,196,032 | Intron 1 | C   | C (100%)   | T (15%)    | C (100%)  | C (100%)** |                                          |
| 45,196,012 | Intron 1 | C   | C (100%)   | C (100%)   | T (13%)   | C (100%)** |                                          |
| 45,195,994 | Intron 1 | C   | C (100%)   | C (100%)   | T (14%)   | C (86%)**  |                                          |
| 45,195,979 | Intron 1 | G   | G (100%)   | A (7%)*    | A (11%)   | G (100%)** |                                          |
| 45,195,975 | Intron 1 | C   | C (100%)   | C (100%)   | T (11%)   | C (100%)** |                                          |
| 45,195,970 | Intron 1 | C   | C (100%)   | C (100%)   | T (11%)   | C (100%)** |                                          |
| 45,195,955 | Intron 1 | C   | C (100%)   | T (7%)*    | T (12%)   | C (100%)** |                                          |
| 45,195,915 | Intron 1 | C   | C (100%)   | T (12%)    | C (100%)  | C (100%)   |                                          |
| 45,195,911 | Intron 1 | G   | G (100%)   | G (100%)   | A (11%)   | G (100%)   |                                          |
| 45,195,873 | Intron 1 | C   | T (100%)   | T (95%)    | T (95%)   | C (100%)   |                                          |
| 45,195,867 | Intron 1 | C   | T (3%)*    | T (4%)*    | T (13%)   | C (100%)   |                                          |
| 45,195,845 | Intron 1 | C   | C (100%)   | C (100%)   | T (18%)   | C (100%)   |                                          |
| 45,195,792 | Intron 1 | C   | C (100%)   | C (100%)   | T (17%)   | C (100%)   |                                          |
| 45,195,772 | Intron 1 | C   | C (100%)   | C (100%)   | T (13%)   | C (100%)   |                                          |
| 45,195,758 | Intron 1 | C   | C (100%)   | T (14%)**  | T (15%)   | C (100%)   |                                          |
| 45,195,732 | Intron 1 | C   | T (3%)*    | T (8%)*    | T (15%)   | C (100%)   |                                          |
| 45,195,721 | Intron 1 | C   | C (100%)   | C (100%)   | T (11%)   | C (100%)   |                                          |
| 45,195,632 | Intron 1 | T   | C (62%)    | C (94%)    | C (93%)   | T (100%)   |                                          |
| 45,195,499 | Intron 1 | C   | C (100%)   | T (14%)    | T (6%)*   | C (100%)   |                                          |
| 45,195,498 | Intron 1 | C   | C (100%)   | T (12%)    | T (6%)*   | T (4%)*    |                                          |
| 45,195,483 | Intron 1 | C   | C (100%)   | T (4%)*    | T (13%)   | C (100%)   |                                          |
| 45,195,445 | Intron 1 | C   | C (100%)   | T (11%)    | C (100%)  | C (100%)   |                                          |
| 45,195,343 | Intron 1 | C   | C (100%)   | T (16%)    | C (100%)  | C (100%)   |                                          |
| 45,195,119 | Intron 1 | A   | C (100%)   | C (95%)    | C (100%)  | C (96%)    |                                          |
| 45,195,111 | Intron 1 | A   | C (100%)   | C (100%)   | C (90%)   | C (96%)    |                                          |
| 45,195,096 | Intron 1 | A   | C (100%)   | C (95%)    | C (100%)  | C (100%)   |                                          |

|            |          |            |                   |                   |                  |                   |                                            |
|------------|----------|------------|-------------------|-------------------|------------------|-------------------|--------------------------------------------|
| 45,194,940 | Intron 1 | C          | C (100%)          | T (13%)           | T (2%)*          | C (100%)          |                                            |
| 45,194,932 | Intron 1 | C          | T (13%)           | T (6%)*           | T (11%)          | C (100%)          |                                            |
| 45,194,913 | Intron 1 | T          | C (13%)           | T (100%)          | C (6%)*          | T (100%)          |                                            |
| 45,194,871 | Intron 1 | G          | A (39%)           | A (4%)*           | A (22%)          | G (100%)          |                                            |
| 45,194,844 | Intron 1 | G          | G (100%)          | A (4%)*           | A (17%)          | G (100%)          |                                            |
| 45,194,843 | Intron 1 | G          | G (100%)          | A (9%)*           | A (11%)          | G (100%)          |                                            |
| 45,194,723 | Intron 1 | C          | C (100%)          | T (11%)           | T (7%)*          | C (100%)          |                                            |
| 45,194,713 | Intron 1 | C          | C (100%)          | C (100%)          | T (14%)          | C (100%)          |                                            |
| 45,194,711 | Intron 1 | C          | C (100%)          | C (100%)          | T (24%)          | C (100%)          |                                            |
| 45,194,705 | Intron 1 | C          | C (100%)          | C (100%)          | T (14%)          | C (100%)          |                                            |
| 45,194,680 | Intron 1 | C          | C (100%)          | T (14%)           | T (3%)*          | C (100%)          |                                            |
| 45,194,677 | Intron 1 | C          | C (100%)          | T (9%)*           | T (11%)          | C (100%)          |                                            |
| 45,194,655 | Intron 1 | C          | C (100%)          | T (4%)*           | T (14%)          | C (100%)          |                                            |
| 45,194,652 | Intron 1 | G          | G (100%)          | A (12%)           | G (100%)         | G (96%)           |                                            |
| 45,194,635 | Exon 2   | <u>TCC</u> | <u>TCC</u> (100%) | <u>TCT</u> (19%)  | <u>TCT</u> (3%)* | <u>TCC</u> (100%) | AGG→R <sub>24</sub><br>AGA→R <sub>24</sub> |
| 45,194,538 | Intron 2 | C          | C (100%)          | C (100%)          | T (12%)          | C (100%)          |                                            |
| 45,194,530 | Intron 2 | A          | A (100%)          | T (12%)           | A (100%)         | A (100%)          |                                            |
| 45,194,501 | Intron 2 | C          | C (100%)          | C (100%)          | T (14%)          | C (100%)          |                                            |
| 45,194,484 | Intron 2 | G          | G (100%)          | A (18%)           | G (100%)         | G (100%)          |                                            |
| 45,194,468 | Intron 2 | G          | A (4%)*           | A (14%)           | G (100%)         | G (100%)          |                                            |
| 45,194,464 | Intron 2 | C          | C (98%)           | C (100%)          | T (18%)          | C (100%)          |                                            |
| 45,194,429 | Intron 2 | G          | G (100%)          | A (20%)           | A (7%)*          | G (100%)          |                                            |
| 45,194,428 | Intron 2 | G          | G (100%)          | A (17%)           | G (100%)         | G (100%)          |                                            |
| 45,194,376 | Intron 2 | C          | C (100%)          | C (100%)          | T (12%)          | C (100%)          |                                            |
| 45,194,255 | Intron 2 | C          | C (100%)          | C (100%)          | T (13%)          | C (100%)          |                                            |
| 45,194,232 | Intron 2 | G          | G (100%)          | G (100%)          | A (12%)          | G (100%)          |                                            |
| 45,194,224 | Intron 2 | C          | C (100%)          | T (5%)*           | T (11%)          | C (100%)          |                                            |
| 45,194,188 | Exon 3   | <u>AAG</u> | <u>AAA</u> (2%)*  | <u>AAG</u> (95%)  | <u>AAA</u> (11%) | <u>AAG</u> (100%) | UUC→F <sub>64</sub><br>UUU→F <sub>64</sub> |
| 45,194,181 | Exon 3   | <u>GAC</u> | <u>GAC</u> (100%) | <u>GAC</u> (100%) | <u>AAC</u> (11%) | <u>GAC</u> (100%) | CUG→L <sub>67</sub><br>UUG→L <sub>67</sub> |
| 45,194,140 | Exon 3   | <u>AAC</u> | <u>AAC</u> (100%) | <u>AAT</u> (6%)*  | <u>AAT</u> (13%) | <u>AAC</u> (100%) | UUG→L <sub>80</sub><br>UUA→L <sub>80</sub> |
| 45,194,137 | Exon 3   | <u>TGG</u> | <u>TGG</u> (100%) | <u>TGA</u> (6%)*  | <u>TGA</u> (11%) | <u>TGG</u> (100%) | ACC→T <sub>81</sub><br>ACU→T <sub>81</sub> |
| 45,194,062 | 3' UTR   | G          | G (96%)           | A (12%)           | A (4%)*          | G (100%)          |                                            |
| 45,194,031 | 3' UTR   |            | -                 | -                 | InsG (40%)       | -                 |                                            |
| 45,193,981 | 3' UTR   | G          | G (98%)           | G (100%)          | A (12%)          | G (100%)          |                                            |

|            |                    |   |          |          |          |          |
|------------|--------------------|---|----------|----------|----------|----------|
| 45,193,964 | 3' UTR             | C | C (100%) | T (11%)  | T (3%)*  | C (97%)  |
| 45,193,851 | 3' UTR             | C | C (100%) | C (100%) | T (11%)  | C (100%) |
| 45,193,823 | 3' UTR             | G | G (100%) | A (11%)  | G (100%) | G (100%) |
| 45,193,789 | 3' UTR             | G | G (100%) | A (5%)*  | A (13%)  | G (100%) |
| 45,193,783 | 3' UTR             | G | G (100%) | G (100%) | A (13%)  | A (4%)*  |
| 45,193,777 | 3' UTR             | C | C (100%) | C (100%) | T (13%)  | C (100%) |
| 45,193,776 | 3' UTR             | C | C (100%) | T (5%)*  | T (19%)  | C (100%) |
| 45,193,753 | 3' UTR             | C | T (3%)*  | T (11%)  | C (100%) | C (100%) |
| 45,193,752 | 3' UTR             | C | C (100%) | T (12%)  | T (8%)*  | C (100%) |
| 45,193,751 | 3' UTR             | C | C (100%) | T (6%)*  | T (17%)  | C (100%) |
| 45,193,742 | 3' UTR             | G | G (100%) | A (13%)  | G (100%) | G (100%) |
| 45,193,728 | 3' UTR             | G | G (100%) | C (86%)  | C (60%)  | G (100%) |
| 45,193,512 | Downstream regions | C | C (100%) | C (100%) | T (12%)  | C (100%) |
| 45,193,507 | Downstream regions | G | G (98%)  | G (100%) | A (12%)  | G (100%) |
| 45,193,503 | Downstream regions | G | A (2%)*  | A (6%)*  | A (11%)  | G (100%) |
| 45,193,502 | Downstream regions | T | T (100%) | T (100%) | T (100%) | C (65%)  |
| 45,193,490 | Downstream regions | C | C (100%) | T (11%)  | T (3%)*  | T (6%)*  |
| 45,193,458 | Downstream regions | G | G (100%) | A (6%)*  | A (11%)  | G (100%) |
| 45,193,414 | Downstream regions | C | C (100%) | C (100%) | T (15%)  | C (100%) |
| 45,193,412 | Downstream regions | C | C (100%) | T (11%)  | C (100%) | C (100%) |
| 45,193,410 | Downstream regions | C | C (100%) | C (100%) | T (17%)  | C (100%) |
| 45,193,401 | Downstream regions | C | C (100%) | T (5%)*  | T (21%)  | C (100%) |
| 45,193,400 | Downstream regions | C | C (100%) | T (5%)*  | T (14%)  | C (100%) |
| 45,193,398 | Downstream regions | C | C (100%) | T (4%)*  | T (15%)  | C (100%) |
| 45,193,324 | Downstream regions | G | G (100%) | A (16%)  | G (100%) | G (100%) |
| 45,193,248 | Downstream regions | C | C (100%) | T (11%)  | C (100%) | C (100%) |
| 45,193,231 | Downstream regions | C | C (100%) | C (100%) | T (11%)  | T (3%)*  |
| 45,193,229 | Downstream regions | C | T (2%)*  | T (5%)*  | T (17%)  | C (100%) |
| 45,193,228 | Downstream regions | C | C (100%) | T (14%)  | C (100%) | T (3%)*  |
| 45,193,178 | Downstream regions | G | G (100%) | G (100%) | A (12%)  | A (5%)*  |
| 45,193,177 | Downstream regions | C | C (100%) | T (100%) | T (46%)  | C (100%) |
| 45,193,173 | Downstream regions | G | A (2%)*  | A (13%)  | A (4%)*  | A (6%)*  |
| 45,193,172 | Downstream regions | C | C (100%) | C (100%) | T (12%)  | C (100%) |

|                   |                    |          |                 |                |                 |                 |
|-------------------|--------------------|----------|-----------------|----------------|-----------------|-----------------|
| <b>45,193,163</b> | Downstream regions | <b>G</b> | <b>G (100%)</b> | <b>A (11%)</b> | <b>G (100%)</b> | <b>G (100%)</b> |
| <b>45,193,151</b> | Downstream regions | <b>G</b> | <b>G (100%)</b> | <b>A (16%)</b> | <b>A (3%)*</b>  | <b>G (100%)</b> |

n.a.: not available; the variant frequency is referred to the percentage of the highlighted base in the sequenced ancient hominine genome, with\* frequency≤10% and \*\* counts<10. In light orange are underlined the variants fixed at 100% in modern human compared to ancient hominines.
