# Supplementary material for: A Catalog of Coding Sequence Variations in Salivary Proteins’ Genes Occurring during Recent Human Evolution
Source: MDPI journal article supplement (doi:10.3390/ijms241915010), 2023-10-09
Supplement: s1 [file s1]

Table S9. Nucleotide Substitutions in *STATH* gene in introns and regulatory regions

| Genomic Coordinates (hg19) | Gene Region     | Modern human | Altai Neanderthal (Variant Frequency) | Chagyrskaya                     | Vindija                         | Denisovan (Variant Frequency) | Codon → Amino acid |
|----------------------------|-----------------|--------------|---------------------------------------|---------------------------------|---------------------------------|-------------------------------|--------------------|
|                            |                 |              |                                       | Neanderthal (Variant Frequency) | Neanderthal (Variant Frequency) |                               |                    |
| 70,861,286                 | Upstream region | G            | A (7%)*                               | G (100%)                        | A (14%)                         | A (3%)*                       |                    |
| 70,861,321                 | Upstream region | G            | G (98%)                               | G (100%)                        | A (17%)                         | G (100%)                      |                    |
| 70,861,322                 | Upstream region | G            | G (100%)                              | G (100%)                        | A (11%)                         | G (100%)                      |                    |
| 70,861,326                 | Upstream region | G            | G (100%)                              | A (3%)*                         | A (16%)                         | G (100%)                      |                    |
| 70,861,343                 | Upstream region | G            | G (100%)                              | G (100%)                        | A (14%)                         | G (100%)                      |                    |
| 70,861,345                 | Upstream region | G            | G (100%)                              | G (100%)                        | A (21%)                         | G (100%)                      |                    |
| 70,861,354                 | Upstream region | C            | C (100%)                              | C (100%)                        | T (11%)                         | C (100%)                      |                    |
| 70,861,408                 | Upstream region | G            | G (100%)                              | G (96%)                         | A (11%)                         | G (100%)                      |                    |
| 70,861,449                 | Upstream region | C            | C (100%)                              | C (100%)                        | T (12%)                         | C (100%)                      |                    |
| 70,861,482                 | Upstream region | G            | G (100%)                              | A (19%)                         | A (4%)*                         | G (100%)                      |                    |
| 70,861,575                 | Upstream region | G            | G (100%)                              | A (9%)*                         | A (13%)                         | G (100%)                      |                    |
| 70,861,643                 | Upstream region | C            | C (100%)                              | C (100%)                        | T (11%)                         | C (100%)                      |                    |
| 70,861,650                 | 5'UTR           | G            | G (100%)                              | A (17%)                         | A (4%)*                         | G (100%)                      |                    |
| 70,861,675                 | 5'UTR           | G            | G (100%)                              | G (100%)                        | A (11%)                         | G (100%)                      |                    |
| 70,861,702                 | 5'UTR           | C            | C (100%)                              | T (15%)                         | T (5%)*                         | C (100%)                      |                    |
| 70,861,720                 | 5'UTR           | T            | C (55%)                               | T (100%)                        | T (100%)                        | T (100%)                      |                    |
| 70,861,728                 | 5'UTR           | C            | C (100%)                              | C (100%)                        | T (12%)                         | C (100%)                      |                    |
| 70,861,779                 | Intron 1        | A            | G (100%)                              | G (96%)                         | G (96%)                         | A (100%)                      |                    |
| 70,861,786                 | Intron 1        | G            | G (100%)                              | G (100%)                        | A (11%)                         | G (97%)                       |                    |
| 70,861,796                 | Intron 1        | C            | C (99%)                               | T (4%)*                         | T (12%)                         | C (100%)                      |                    |
| 70,861,974                 | Intron 1        | A            | G (100%)                              | G (97%)                         | G (96%)                         | G (100%)                      |                    |
| 70,862,105                 | Intron 1        | G            | A (8%)*                               | A (9%)*                         | A (13%)                         | G (100%)                      |                    |
| 70,862,192                 | Intron 1        | C            | C (100%)                              | T (21%)                         | C (100%)                        | C (100%)                      |                    |
| 70,862,294                 | Intron 1        | C            | T (97%)                               | T (100%)                        | T (100%)                        | C (100%)                      |                    |
| 70,862,374                 | Intron 1        | G            | A (1%)*                               | A (2%)*                         | A (13%)                         | G (100%)                      |                    |
| 70,862,380                 | Intron 1        | T            | T (100%)                              | T (100%)                        | delT (41%)                      | T (97%)                       |                    |
| 70,862,448                 | Intron 1        | G            | G (100%)                              | A (8%)*                         | A (25%)                         | G (100%)                      |                    |
| 70,862,458                 | Intron 1        | C            | C (99%)                               | C (100%)                        | T (13%)                         | C (100%)                      |                    |
| 70,862,463                 | Intron 1        | C            | T (1%)*                               | T (13%)                         | T (4%)*                         | C (100%)                      |                    |
| 70,862,526                 | Intron 1        | C            | C (100%)                              | T (3%)*                         | T (11%)                         | C (100%)                      |                    |

|            |                    |     |            |              |             |            |                                                  |
|------------|--------------------|-----|------------|--------------|-------------|------------|--------------------------------------------------|
| 70,862,547 | Intron 1           | C   | T (99%)    | T (100%)     | T (97%)     | C (100%)   |                                                  |
| 70,862,645 | Intron 1           | T   | delT (44%) | delT (20%)** | delT (25%)  | delT (33%) |                                                  |
| 70,862,646 | Intron 1           | T   | delT (11%) | delT (20%)** | delT (10%)* | delT (17%) |                                                  |
| 70,862,666 | Intron 1           | T   | A (18%)    | A (50%)**    | A (19%)     | A (7%)*    |                                                  |
| 70,862,668 | Intron 1           | A   | T (19%)    | A (100%)     | T (4%)*     | A (100%)   |                                                  |
| 70,862,677 | Intron 1           | A   | G (22%)    | G (17%)**    | G (20%)     | A (100%)   |                                                  |
| 70,862,684 | Intron 1           | C   | C (96%)    | C (100%)     | T (20%)     | C (100%)   |                                                  |
| 70,862,700 | Intron 1           | G   | G (100%)   | G (100%)     | A (15%)     | G (100%)   |                                                  |
| 70,862,715 | Intron 1           | T   | C (45%)    | C (47%)      | C (13%)     | T (100%)   |                                                  |
| 70,862,730 | Intron 1           | C   | T (3%)*    | T (11%)      | T (6%)*     | T (4%)*    |                                                  |
| 70,862,732 | Intron 1           | G   | G (100%)   | A (11%)      | G (100%)    | G (100%)   |                                                  |
| 70,862,736 | Intron 1           | C   | T (3%)*    | C (100%)     | T (13%)     | C (100%)   |                                                  |
| 70,862,797 | Intron 1           | G   | G (100%)   | G (100%)     | A (13%)     | G (100%)   |                                                  |
| 70,862,917 | Intron 1           | C   | C (100%)   | C (100%)     | T (13%)     | C (100%)   |                                                  |
| 70,863,157 | Intron 1           | C   | C (100%)   | T (3%)*      | T (12%)     | C (100%)   |                                                  |
| 70,863,163 | Intron 1           | C   | C (99%)    | T (11%)      | T (12%)     | T (4%)*    |                                                  |
| 70,863,200 | Intron 1           | G   | G (100%)   | A (13%)      | A (5%)*     | G (100%)   |                                                  |
| 70,863,375 | Intron 1           | G   | G (100%)   | A (3%)*      | A (11%)     | G (100%)   |                                                  |
| 70,863,442 | Intron 1           | G   | A (2%)*    | G (100%)     | A (11%)     | G (100%)   |                                                  |
| 70,863,443 | Intron 1           | G   | G (98%)    | A (8%)*      | A (15%)     | G (100%)   |                                                  |
| 70,863,668 | Intron 1           | C   | C (100%)   | T (12%)      | C (100%)    | C (100%)   |                                                  |
| 70,863,751 | Intron 1           | C   | T (2%)*    | C (100%)     | T (12%)     | C (100%)   |                                                  |
| 70,863,822 | Intron 1           | C   | C (100%)   | T (13%)      | C (100%)    | C (100%)   |                                                  |
| 70,863,839 | Intron 1           | T   | C (100%)   | C (92%)      | C (86%)     | C (97%)    |                                                  |
| 70,863,883 | Intron 1           | C   | C (100%)   | T (12%)      | T (15%)     | C (100%)   |                                                  |
| 70,863,924 | Intron 1           | A   | T (100%)   | T (100%)     | T (100%)    | A (100%)   |                                                  |
| 70,863,952 | Intron 1           | A   | G (100%)   | G (92%)      | G (100%)    | A (100%)   |                                                  |
| 70,863,957 | Intron 1           | C   | T (100%)   | T (100%)     | T (100%)    | C (100%)   |                                                  |
| 70,864,053 | Intron 1           | G   | G (100%)   | A (13%)      | G (100%)    | G (100%)   |                                                  |
| 70,864,178 | Exon 2<br>(Signal) | TTC | TTC (100%) | TTC (100%)   | TTT (11%)   | TTC (100%) | UUC→F <sub>7(sp)</sub><br>UUU→F <sub>7(sp)</sub> |
| 70,864,261 | Intron 2           | C   | C (98%)    | T (11%)      | T (3%)*     | C (100%)   |                                                  |
| 70,864,274 | Intron 2           | G   | G (100%)   | A (15%)      | G (100%)    | G (100%)   |                                                  |
| 70,864,349 | Intron 2           | C   | C (100%)   | T (12%)      | T (8%)*     | C (100%)   |                                                  |
| 70,864,353 | Intron 2           | C   | C (100%)   | C (100%)     | T (11%)     | C (100%)   |                                                  |

|            |          |   |          |          |          |          |
|------------|----------|---|----------|----------|----------|----------|
| 70,864,509 | Intron 2 | C | C (100%) | T (13%)  | T (3%)*  | C (100%) |
| 70,864,733 | Intron 2 | T | G (98%)  | G (100%) | G (100%) | T (100%) |
| 70,864,751 | Intron 2 | A | G (97%)  | G (100%) | G (89%)  | A (100%) |
| 70,864,762 | Intron 2 | G | A (2%)*  | G (100%) | A (13%)  | G (100%) |
| 70,864,768 | Intron 2 | G | G (100%) | A (11%)  | A (8%)*  | G (100%) |
| 70,864,822 | Intron 2 | G | G (100%) | G (100%) | A (13%)  | G (100%) |
| 70,864,970 | Intron 2 | C | C (100%) | T (5%)*  | T (12%)  | C (100%) |
| 70,865,133 | Intron 2 | C | T (1%)*  | C (100%) | T (19%)  | C (100%) |
| 70,865,136 | Intron 2 | C | C (100%) | T (10%)* | T (12%)  | C (100%) |
| 70,865,137 | Intron 2 | C | C (100%) | T (13%)  | T (4%)*  | C (97%)  |
| 70,865,152 | Intron 2 | C | C (99%)  | C (100%) | T (11%)  | C (100%) |
| 70,865,189 | Intron 2 | C | C (98%)  | C (100%) | T (14%)  | C (100%) |
| 70,865,193 | Intron 2 | C | C (100%) | C (100%) | T (11%)  | C (100%) |
| 70,865,261 | Intron 2 | G | G (100%) | A (11%)  | A (3%)*  | G (100%) |
| 70,865,284 | Intron 2 | C | C (100%) | C (100%) | T (11%)  | C (100%) |
| 70,865,285 | Intron 2 | C | C (100%) | C (100%) | T (13%)  | C (100%) |
| 70,865,405 | Intron 3 | G | A (3%)*  | A (2%)*  | A (13%)  | G (100%) |
| 70,865,533 | Intron 4 | G | A (100%) | A (100%) | A (100%) | G (100%) |
| 70,865,633 | Intron 4 | C | T (1%)*  | T (11%)  | C (100%) | C (100%) |
| 70,865,638 | Intron 4 | G | G (100%) | A (13%)  | G (100%) | G (100%) |
| 70,865,677 | Intron 4 | A | C (100%) | C (100%) | C (81%)  | C (100%) |
| 70,865,748 | Intron 4 | C | T (2%)*  | T (14%)  | T (5%)*  | C (100%) |
| 70,865,768 | Intron 4 | C | C (100%) | T (4%)*  | T (14%)  | C (100%) |
| 70,865,853 | Intron 4 | G | G (100%) | A (11%)  | G (100%) | G (100%) |
| 70,866,032 | Intron 4 | G | G (100%) | G (100%) | A (13%)  | G (100%) |
| 70,866,033 | Intron 4 | G | G (98%)  | G (100%) | A (13%)  | G (100%) |
| 70,866,034 | Intron 4 | G | G (100%) | G (100%) | A (19%)  | G (100%) |
| 70,866,046 | Intron 4 | C | C (100%) | C (100%) | T (13%)  | C (100%) |
| 70,866,061 | Intron 4 | G | G (100%) | G (100%) | A (14%)  | G (100%) |
| 70,866,109 | Intron 4 | G | G (98%)  | A (4%)*  | A (15%)  | G (100%) |
| 70,866,118 | Intron 4 | T | C (96%)  | C (95%)  | C (94%)  | T (100%) |
| 70,866,221 | Intron 4 | T | A (97%)  | A (100%) | A (100%) | A (100%) |
| 70,866,267 | Intron 4 | G | G (100%) | G (100%) | A (13%)  | G (100%) |
| 70,866,278 | Intron 4 | G | A (2%)*  | A (6%)*  | A (11%)  | G (100%) |
| 70,866,503 | Intron 4 | C | C (100%) | T (12%)  | C (100%) | C (100%) |

|            |          |     |             |             |              |              |                                            |
|------------|----------|-----|-------------|-------------|--------------|--------------|--------------------------------------------|
| 70,866,529 | Intron 4 | C   | C (100%)    | T (11%)     | T (5%)*      | C (100%)     |                                            |
| 70,866,660 | Exon 5   | ACC | ACC (98%)   | ACT (11%)   | ACC (100%)   | ACC (100%)   | ACC→T <sub>42</sub><br>ACU→T <sub>42</sub> |
| 70,866,707 | Intron 5 | G   | G (100%)    | G (100%)    | A (12%)      | G (100%)     |                                            |
| 70,866,776 | Intron 5 | A   | C (100%)    | C (100%)    | C (98%)      | A (100%)     |                                            |
| 70,866,862 | Intron 5 | G   | G (100%)    | T (11%)     | G (100%)     | G (100%)     |                                            |
| 70,866,864 | Intron 5 | T   | T (100%)    | A (11%)     | T (100%)     | T (100%)     |                                            |
| 70,866,865 | Intron 5 |     | InsAA (92%) | InsAA (55%) | InsAA (100%) | InsAA (100%) |                                            |
| 70,866,866 | Intron 5 | G   | G (100%)    | A (28%)     | G (100%)     | G (100%)     |                                            |
| 70,866,867 | Intron 5 | T   | T (100%)    | A (28%)     | T (100%)     | T (100%)     |                                            |
| 70,866,868 | Intron 5 | C   | C (100%)    | C (100%)    | G (18%)      | C (100%)     |                                            |
| 70,866,893 | Intron 5 | A   | T (100%)    | T (100%)    | T (100%)     | A (100%)     |                                            |
| 70,866,917 | Intron 5 | G   | A (3%)*     | G (100%)    | A (15%)      | G (100%)     |                                            |
| 70,866,944 | Intron 5 | C   | C (100%)    | T (7%)*     | T (17%)      | C (100%)     |                                            |
| 70,866,954 | Intron 5 | G   | G (100%)    | G (100%)    | A (15%)      | G (100%)     |                                            |
| 70,866,963 | Intron 5 | C   | C (100%)    | C (100%)    | T (11%)      | C (100%)     |                                            |
| 70,866,979 | Intron 5 | T   | C (98%)     | C (100%)    | C (100%)     | T (100%)     |                                            |
| 70,866,980 | Intron 5 | G   | A (2%)*     | G (100%)    | A (11%)      | G (100%)     |                                            |
| 70,866,996 | Intron 5 | G   | A (98%)     | A (100%)    | A (100%)     | G (100%)     |                                            |
| 70,867,021 | Intron 5 | C   | C (100%)    | T (7%)*     | T (13%)      | C (100%)     |                                            |
| 70,867,092 | Intron 5 | G   | G (100%)    | A (13%)     | A (6%)*      | G (100%)     |                                            |
| 70,867,137 | Intron 5 | C   | C (100%)    | T (4%)*     | T (14%)      | C (100%)     |                                            |
| 70,867,142 | Intron 5 | G   | G (100%)    | A (14%)     | A (5%)*      | G (100%)     |                                            |
| 70,867,237 | Intron 5 | C   | C (100%)    | T (13%)     | T (4%)*      | C (100%)     |                                            |
| 70,867,238 | Intron 5 | C   | C (100%)    | C (100%)    | T (14%)      | C (100%)     |                                            |
| 70,867,289 | Intron 5 | C   | T (1%)*     | T (6%)*     | T (12%)      | T (3%)*      |                                            |
| 70,867,343 | Intron 5 | C   | C (100%)    | T (3%)*     | T (11%)      | C (100%)     |                                            |
| 70,867,424 | Intron 5 | G   | A (1%)*     | A (11%)     | A (3%)*      | G (100%)     |                                            |
| 70,867,426 | Intron 5 | G   | G (100%)    | A (11%)     | A (3%)*      | G (100%)     |                                            |
| 70,867,431 | Intron 5 | G   | G (100%)    | A (10%)*    | A (12%)      | G (100%)     |                                            |
| 70,867,457 | Intron 5 | G   | G (100%)    | G (100%)    | A (11%)      | G (100%)     |                                            |
| 70,867,522 | Intron 5 | G   | A (100%)    | A (100%)    | A (100%)     | G (100%)     |                                            |
| 70,867,531 | Intron 5 | G   | A (2%)*     | A (12%)     | A (2%)*      | G (100%)     |                                            |
| 70,867,535 | Intron 5 | G   | G (100%)    | A (11%)     | A (2%)*      | G (100%)     |                                            |
| 70,867,537 | Intron 5 | G   | G (97%)     | A (11%)     | A (5%)*      | G (100%)     |                                            |

|            |                    |   |          |          |            |          |
|------------|--------------------|---|----------|----------|------------|----------|
| 70,867,623 | Intron 5           | G | G (100%) | G (100%) | A (13%)    | G (100%) |
| 70,867,656 | Intron 5           | T | C (98%)  | C (100%) | C (97%)    | T (100%) |
| 70,867,787 | Intron 5           | C | C (100%) | T (6%)*  | T (12%)    | C (100%) |
| 70,867,856 | Intron 5           | C | C (100%) | T (3%)*  | T (13%)    | C (100%) |
| 70,867,859 | Intron 5           | G | G (100%) | A (6%)*  | A (17%)    | G (100%) |
| 70,867,886 | Intron 5           |   | -        | -        | InsT (23%) | -        |
| 70,867,898 | Intron 5           | C | C (98%)  | C (100%) | T (12%)    | T (2%)*  |
| 70,867,971 | 3'UTR              | C | C (100%) | C (100%) | T (13%)    | C (100%) |
| 70,868,014 | 3'UTR              | C | C (100%) | T (7%)*  | T (11%)    | C (100%) |
| 70,868,162 | 3'UTR              | A | G (98%)  | G (97%)  | G (94%)    | A (100%) |
| 70,868,247 | Downstream regions | C | C (100%) | T (9%)*  | T (11%)    | C (100%) |
| 70,868,250 | Downstream regions | G | G (100%) | G (100%) | A (16%)    | G (100%) |
| 70,868,280 | Downstream regions | C | C (100%) | T (12%)  | T (4%)*    | C (100%) |
| 70,868,378 | Downstream regions | C | C (100%) | T (12%)  | C (97%)    | C (100%) |
| 70,868,397 | Downstream regions | C | C (100%) | C (100%) | T (12%)    | C (100%) |
| 70,868,398 | Downstream regions | C | C (100%) | T (11%)  | T (6%)*    | C (100%) |
| 70,868,410 | Downstream regions | G | A (2%)*  | A (3%)*  | A (11%)    | G (100%) |
| 70,868,420 | Downstream regions | C | T (2%)*  | T (6%)*  | T (11%)    | C (100%) |
| 70,868,471 | Downstream regions | C | C (100%) | T (11%)  | C (100%)   | C (100%) |
| 70,868,546 | Downstream regions | T | C (99%)  | C (100%) | C (96%)    | T (100%) |
| 70,868,550 | Downstream regions | C | T (99%)  | T (100%) | T (100%)   | C (100%) |
| 70,868,585 | Downstream regions | T | G (98%)  | G (91%)  | G (100%)   | T (100%) |

n.a.: not available; the variant frequency is referred to the percentage of the highlighted base in the sequenced ancient hominine genome, with\* frequency≤10% and \*\* counts<10. In light orange are underlined the variants fixed at 100% in modern human compared to ancient hominines.
