# Supplementary material for: A Catalog of Coding Sequence Variations in Salivary Proteins’ Genes Occurring during Recent Human Evolution
Source: MDPI journal article supplement (doi:10.3390/ijms241915010), 2023-10-09
Supplement: s1 [file s1]

Table S2. Nucleotide Substitutions in *PRB2* gene in introns and regulatory regions

| Genomic Coordinates (hg19) | Gene Region      | Modern human | Altai Neanderthal (Variant Frequency) | Chagyrskaya Neanderthal (Variant Frequency) | Vindija Neanderthal (Variant Frequency) | Denisovan (Variant Frequency) | Codon → Amino acid                               |
|----------------------------|------------------|--------------|---------------------------------------|---------------------------------------------|-----------------------------------------|-------------------------------|--------------------------------------------------|
| 11,548,942                 | Upstream regions | G            | G (100%)                              | G (100%)                                    | A (13%)                                 | G (100%)                      |                                                  |
| 11,548,866                 | Upstream regions | G            | G (100%)                              | G (100%)                                    | A (13%)                                 | G (100%)                      |                                                  |
| 11,548,855                 | Upstream regions | G            | C (70%)                               | C (71%)                                     | C (61%)                                 | C (76%)                       |                                                  |
| 11,548,817                 | Upstream regions | C            | C (99%)                               | T (3%)*                                     | T (12%)                                 | C (100%)                      |                                                  |
| 11,548,807                 | Upstream regions | G            | G (100%)                              | A (6%)*                                     | A (20%)                                 | A (2%)*                       |                                                  |
| 11,548,679                 | Upstream regions | G            | G (100%)                              | A (5%)*                                     | A (12%)                                 | G (100%)                      |                                                  |
| 11,548,613                 | Upstream regions | C            | C (100%)                              | T (18%)                                     | C (100%)                                | C (100%)                      |                                                  |
| 11,548,610                 | Upstream regions | C            | C (100%)                              | T (15%)                                     | C (100%)                                | C (100%)                      |                                                  |
| 11,548,583                 | Upstream regions | C            | C (100%)                              | C (100%)                                    | T (20%)                                 | C (100%)                      |                                                  |
| 11,548,522                 | Upstream regions | C            | C (100%)                              | T (11%)                                     | T (7%)*                                 | C (100%)                      |                                                  |
| 11,548,436                 | Exon 1 (Signal)  | <u>A</u> AC  | <u>G</u> AC (69%)                     | <u>G</u> AC (58%)                           | <u>G</u> AC (60%)                       | <u>G</u> AC (67%)             | UUG→L <sup>9(sp)</sup><br>CUG→L <sup>9(sp)</sup> |
| 11,548,358                 | Intron 1         | C            | C (100%)                              | C (100%)                                    | T (15%)                                 | C (100%)                      |                                                  |
| 11,548,273                 | Intron 1         | C            | T (2%)*                               | T (3%)*                                     | T (13%)                                 | C (100%)                      |                                                  |
| 11,548,178                 | Intron 1         | C            | C (100%)                              | T (11%)                                     | C (100%)                                | C (100%)                      |                                                  |
| 11,548,055                 | Intron 1         | C            | C (100%)                              | T (16%)                                     | T (5%)*                                 | C (100%)                      |                                                  |
| 11,548,051                 | Intron 1         | C            | C (100%)                              | T (17%)                                     | T (7%)*                                 | C (100%)                      |                                                  |
| 11,547,994                 | Intron 1         | C            | C (100%)                              | T (9%)*                                     | T (11%)                                 | C (100%)                      |                                                  |
| 11,547,988                 | Intron 1         | C            | C (100%)                              | T (15%)                                     | T (4%)*                                 | C (100%)                      |                                                  |
| 11,547,770                 | Intron 1         | C            | C (100%)                              | C (100%)                                    | T (11%)                                 | C (100%)                      |                                                  |
| 11,547,743                 | Intron 1         | G            | G (100%)                              | A (7%)*                                     | A (14%)                                 | G (100%)                      |                                                  |
| 11,547,734                 | Intron 1         | C            | C (100%)                              | T (12%)                                     | C (100%)                                | C (100%)                      |                                                  |
| 11,547,684                 | Intron 1         | C            | C (100%)                              | T (12%)                                     | T (8%)*                                 | C (100%)                      |                                                  |
| 11,547,682                 | Intron 1         | C            | C (100%)                              | T (12%)                                     | T (4%)*                                 | C (100%)                      |                                                  |
| 11,547,651                 | Intron 1         | G            | G (100%)                              | A (4%)*                                     | A (12%)                                 | G (100%)                      |                                                  |
| 11,547,642                 | Intron 1         | G            | G (100%)                              | A (8%)*                                     | A (13%)                                 | G (100%)                      |                                                  |
| 11,547,639                 | Intron 1         | G            | G (100%)                              | A (4%)*                                     | A (15%)                                 | G (100%)                      |                                                  |
| 11,547,624                 | Intron 1         | G            | A (2%)*                               | A (5%)*                                     | A (11%)                                 | G (100%)                      |                                                  |
| 11,547,595                 | Intron 1         | C            | C (100%)                              | T (14%)                                     | T (3%)*                                 | C (100%)                      |                                                  |
| 11,547,570                 | Intron 1         | C            | C (100%)                              | T (7%)*                                     | T (11%)                                 | C (100%)                      |                                                  |

|            |                   |                     |                            |                            |                            |                            |                                            |
|------------|-------------------|---------------------|----------------------------|----------------------------|----------------------------|----------------------------|--------------------------------------------|
| 11,547,569 | Intron 1          | C                   | T (2%)*                    | T (11%)                    | T (6%)*                    | C (100%)                   |                                            |
| 11,547,568 | Intron 1          | C                   | C (100%)                   | T (7%)*                    | T (16%)                    | C (100%)                   |                                            |
| 11,547,565 | Intron 1          | C                   | C (100%)                   | T (4%)*                    | T (12%)                    | C (100%)                   |                                            |
| 11,547,493 | Intron 1          | C                   | A (97%)                    | A (100%)                   | A (100%)                   | A (94%)                    |                                            |
| 11,547,428 | Intron 2          | C                   | T (2%)*                    | T (13%)                    | T (3%)*                    | C (100%)                   |                                            |
| 11,547,411 | Intron 2          | G                   | G (100%)                   | A (13%)                    | A (3%)*                    | G (100%)                   |                                            |
| 11,547,319 | Intron 2          | C                   | C (100%)                   | T (12%)                    | T (6%)*                    | C (100%)                   |                                            |
| 11,547,282 | Intron 2          | G                   | A (3%)*                    | A (6%)*                    | A (15%)                    | G (100%)                   |                                            |
| 11,547,238 | Intron 2          | C                   | C (100%)                   | T (3%)*                    | T (15%)                    | C (100%)                   |                                            |
| 11,547,210 | Intron 2          | C                   | C (100%)                   | T (12%)                    | T (8%)*                    | C (100%)                   |                                            |
| 11,547,206 | Intron 2          | C                   | C (100%)                   | T (4%)*                    | T (15%)                    | C (100%)                   |                                            |
| 11,547,196 | Intron 2          | G                   | G (100%)                   | A (100%)                   | A (13%)                    | G (100%)                   |                                            |
| 11,547,194 | Intron 2          | G                   | G (100%)                   | A (8%)*                    | A (20%)                    | G (100%)                   |                                            |
| 11,547,185 | Intron 2          | C                   | C (100%)                   | C (100%)                   | T (13%)                    | C (100%)                   |                                            |
| 11,547,160 | Intron 2          | G                   | A (100%)                   | A (100%)                   | G (100%)                   | G (100%)                   |                                            |
| 11,547,133 | Intron 2          | G                   | A (3%)*                    | A (11%)                    | G (100%)                   | G (100%)                   |                                            |
| 11,547,130 | Intron 2          | G                   | G (100%)                   | A (11%)                    | G (100%)                   | G (100%)                   |                                            |
| 11,547,117 | Intron 2          | C                   | C (100%)                   | C (100%)                   | T (11%)                    | C (97%)                    |                                            |
| 11,547,581 | Intron 2          | C                   | C (100%)                   | C (100%)                   | T (11%)                    | C (100%)                   |                                            |
| 11,546,742 | Exon 3<br>(IB-1)  | G <u>T</u> <u>T</u> | G <u>T</u> <u>C</u> (15%)  | G <u>T</u> <u>C</u> (30%)  | G <u>T</u> <u>C</u> (9%)*  | G <u>T</u> <u>C</u> (35%)  | CAA→Q <sub>74</sub><br>CAG→Q <sub>74</sub> |
| 11,546,634 | Exon 3<br>(P-J)   | C <u>C</u> <u>G</u> | C <u>C</u> <u>A</u> (3%)*  | C <u>C</u> <u>A</u> (15%)  | C <u>C</u> <u>A</u> (16%)  | C <u>C</u> <u>A</u> (6%)*  | GGC→G <sub>14</sub><br>GGU→G <sub>14</sub> |
| 11,546,559 | Exon 3<br>(P-J)   | G <u>T</u> <u>T</u> | G <u>T</u> <u>C</u> (8%)*  | G <u>T</u> <u>C</u> (18%)  | G <u>T</u> <u>C</u> (22%)  | G <u>T</u> <u>C</u> (19%)  | CAA→Q <sub>39</sub><br>CAG→Q <sub>39</sub> |
| 11,546,553 | Exon 3<br>(P-J)   | G <u>G</u> <u>G</u> | G <u>G</u> <u>G</u> (100%) | G <u>G</u> <u>G</u> (100%) | G <u>G</u> <u>A</u> (11%)  | G <u>G</u> <u>G</u> (100%) | CCC→P <sub>42</sub><br>CCU→P <sub>42</sub> |
| 11,546,523 | Exon 3<br>(P-J)   | G <u>G</u> <u>G</u> | G <u>G</u> <u>G</u> (100%) | G <u>G</u> <u>G</u> (100%) | G <u>G</u> <u>A</u> (13%)  | G <u>G</u> <u>G</u> (100%) | CCC→P <sub>52</sub><br>CCU→P <sub>52</sub> |
| 11,546,373 | Exon 3<br>(IB-8a) | G <u>T</u> <u>T</u> | G <u>T</u> <u>C</u> (10%)  | G <u>T</u> <u>T</u> (100%) | G <u>T</u> <u>C</u> (27%)  | G <u>T</u> <u>C</u> (5%)*  | CAA→Q <sub>39</sub><br>CAG→Q <sub>39</sub> |
| 11,546,367 | Exon 3<br>(IB-8a) | G <u>G</u> <u>G</u> | G <u>G</u> <u>G</u> (100%) | G <u>G</u> <u>A</u> (11%)  | G <u>G</u> <u>G</u> (100%) | G <u>G</u> <u>G</u> (100%) | CCC→P <sub>41</sub><br>CCU→P <sub>41</sub> |
| 11,546,262 | Exon 3<br>(IB-8a) | C <u>C</u> <u>G</u> | C <u>C</u> <u>A</u> (11%)  | C <u>C</u> <u>A</u> (8%)*  | C <u>C</u> <u>A</u> (5%)*  | C <u>C</u> <u>A</u> (5%)*  | GGC→G <sub>76</sub><br>GGU→G <sub>76</sub> |
| 11,546,259 | Exon 3<br>(IB-8a) | T <u>T</u> <u>G</u> | T <u>T</u> <u>G</u> (100%) | T <u>T</u> <u>A</u> (27%)  | T <u>T</u> <u>G</u> (100%) | T <u>T</u> <u>G</u> (100%) | AAC→N <sub>77</sub><br>AAC→N <sub>77</sub> |
| 11,546,088 | Exon 3<br>(P-F)   | G <u>G</u> <u>G</u> | G <u>G</u> <u>G</u> (100%) | G <u>G</u> <u>G</u> (100%) | G <u>G</u> <u>A</u> (17%)  | G <u>G</u> <u>G</u> (100%) | CCC→P <sub>10</sub><br>CCU→P <sub>10</sub> |
| 11,546,013 | Exon 3<br>(P-F)   | C <u>C</u> <u>G</u> | C <u>C</u> <u>A</u> (3%)*  | C <u>C</u> <u>A</u> (15%)  | C <u>C</u> <u>G</u> (100%) | C <u>C</u> <u>G</u> (100%) | GGC→G <sub>35</sub><br>GGU→G <sub>35</sub> |
| 11,546,007 | Exon 3<br>(P-F)   | T <u>T</u> <u>T</u> | T <u>T</u> <u>T</u> (100%) | T <u>T</u> <u>T</u> (100%) | T <u>T</u> <u>T</u> (100%) | T <u>T</u> <u>C</u> (15%)  | AAA→K <sub>37</sub><br>AAG→K <sub>37</sub> |
| 11,546,001 | Exon 3<br>(P-F)   | G <u>T</u> <u>T</u> | G <u>T</u> <u>C</u> (11%)  | G <u>T</u> <u>C</u> (100%) | G <u>T</u> <u>C</u> (13%)  | G <u>T</u> <u>C</u> (11%)  | CAA→Q <sub>39</sub><br>CAG→Q <sub>39</sub> |
| 11,545,965 | Exon 3<br>(P-F)   | G <u>G</u> <u>G</u> | G <u>G</u> <u>G</u> (100%) | G <u>G</u> <u>A</u> (14%)  | G <u>G</u> <u>G</u> (100%) | G <u>G</u> <u>G</u> (100%) | CCC→P <sub>51</sub><br>CCU→P <sub>51</sub> |

|            |                       |     |            |            |           |            |                                            |
|------------|-----------------------|-----|------------|------------|-----------|------------|--------------------------------------------|
| 11,545,790 | Exon 3<br>(P-H)       | CCC | CCC (100%) | CCC (100%) | CCT (14%) | CCC (100%) | GGG→G <sub>48</sub><br>GGA→G <sub>48</sub> |
| 11,544,480 | 3' UTR                | G   | A (2%)*    | A (11%)    | G (100%)  | G (97%)    |                                            |
| 11,544,389 | Downstream<br>regions | G   | T (100%)   | T (100%)   | G (96%)   | G (100%)   |                                            |
| 11,544,353 | Downstream<br>regions | G   | G (98%)    | A (68%)    | A (38%)   | G (100%)   |                                            |
| 11,544,289 | Downstream<br>regions | G   | G (100%)   | A (13%)    | A (6%)*   | G (100%)   |                                            |
| 11,544,278 | Downstream<br>regions | G   | G (100%)   | A (15%)    | A (6%)*   | G (100%)   |                                            |
| 11,544,213 | Downstream<br>regions | G   | G (100%)   | A (19%)    | A (7%)*   | G (100%)   |                                            |
| 11,544,172 | Downstream<br>regions | G   | G (100%)   | A (3%)*    | A (14%)   | G (100%)   |                                            |
| 11,544,043 | Downstream<br>regions | C   | C (100%)   | T (6%)*    | T (11%)   | C (100%)   |                                            |
| 11,544,014 | Downstream<br>regions | G   | A (100%)   | A (100%)   | A (100%)  | A (100%)   |                                            |

n.a.: not available; the variant frequency is referred to the percentage of the highlighted base in the sequenced ancient hominine genome, with\* frequency≤10%. In light orange are underlined the variants fixed at 100% in modern human compared to ancient hominines.
