# Supplementary material for: A Catalog of Coding Sequence Variations in Salivary Proteins’ Genes Occurring during Recent Human Evolution
Source: MDPI journal article supplement (doi:10.3390/ijms241915010), 2023-10-09
Supplement: s1 [file s1]

Table S11. Nucleotide Substitutions in *CST1* gene in introns and regulatory regions

| Genomic Coordinates (hg19) | Gene Region      | Modern human | Altai Neanderthal (Variant Frequency) | Chagyrskaya Neanderthal (Variant Frequency) | Vindija Neanderthal (Variant Frequency) | Denisovan (Variant Frequency) | Codon → amino acid                                 |
|----------------------------|------------------|--------------|---------------------------------------|---------------------------------------------|-----------------------------------------|-------------------------------|----------------------------------------------------|
| 23,731,947                 | Upstream regions | G            | A (2%)*                               | G (100%)                                    | A (14%)                                 | G (100%)                      |                                                    |
| 23,731,940                 | Upstream regions | C            | C (100%)                              | T (12%)                                     | T (7%)*                                 | C (100%)                      |                                                    |
| 23,731,864                 | Upstream regions | G            | G (100%)                              | G (100%)                                    | A (15%)                                 | G (100%)                      |                                                    |
| 23,731,815                 | Upstream regions | C            | C (100%)                              | C (100%)                                    | T (13%)                                 | C (100%)                      |                                                    |
| 23,731,810                 | Upstream regions | C            | C (100%)                              | C (100%)                                    | T (13%)                                 | C (100%)                      |                                                    |
| 23,731,800                 | Upstream regions | C            | C (100%)                              | T (13%)                                     | C (100%)                                | C (100%)                      |                                                    |
| 23,731,770                 | Upstream regions | C            | C (100%)                              | C (100%)                                    | T (17%)                                 | C (100%)                      |                                                    |
| 23,731,769                 | Upstream regions | C            | T (2%)*                               | T (8%)*                                     | T (17%)                                 | C (100%)                      |                                                    |
| 23,731,741                 | Upstream regions | C            | C (100%)                              | T (30%)                                     | C (100%)                                | C (100%)                      |                                                    |
| 23,731,738                 | Upstream regions | C            | T (3%)*                               | T (20%)                                     | C (100%)                                | C (100%)                      |                                                    |
| 23,731,721                 | Upstream regions | C            | T (87%)                               | T (100%)                                    | T (71%)                                 | T (95%)                       |                                                    |
| 23,731,719                 | Upstream regions | C            | T (90%)                               | T (100%)                                    | T (79%)                                 | T (96%)                       |                                                    |
| 23,731,705                 | Upstream regions | C            | C (100%)                              | C (100%)                                    | T (13%)                                 | C (100%)                      |                                                    |
| 23,731,665                 | Upstream regions | T            | G (100%)                              | G (89%)                                     | G (88%)**                               | G (94%)                       |                                                    |
| 23,731,653                 | Upstream regions | C            | T (95%)                               | T (100%)                                    | T (100%)**                              | T (100%)                      |                                                    |
| 23,731,624                 | Upstream regions | C            | C (100%)                              | T (9%)*                                     | T (17%)                                 | C (100%)                      |                                                    |
| 23,731,620                 | Upstream regions | C            | C (100%)                              | T (7%)*                                     | T (17%)                                 | C (100%)                      |                                                    |
| 23,731,619                 | Upstream regions | C            | C (100%)                              | T (7%)*                                     | T (17%)                                 | C (100%)                      |                                                    |
| 23,731,589                 | Upstream regions | G            | C (58%)                               | C (60%)                                     | C (54%)                                 | C (36%)                       |                                                    |
| 23,731,571                 | 5'UTR            | G            | G (100%)                              | G (100%)                                    | A (13%)                                 | G (100%)                      |                                                    |
| 23,731,563                 | 5'UTR            | G            | G (100%)                              | A (11%)                                     | A (5%)*                                 | G (100%)                      |                                                    |
| 23,731,560                 | 5'UTR            | C            | T (69%)                               | T (47%)                                     | T (42%)                                 | T (56%)                       |                                                    |
| 23,731,557                 | 5'UTR            | G            | G (100%)                              | G (100%)                                    | A (11%)                                 | G (100%)                      |                                                    |
| 23,731,551                 | 5'UTR            | G            | G (100%)                              | A (19%)                                     | A (5%)*                                 | G (100%)                      |                                                    |
| 23,731,550                 | 5'UTR            | G            | G (100%)                              | A (13%)                                     | A (5%)*                                 | G (100%)                      |                                                    |
| 23,731,527                 | 5'UTR            | A            | G (34%)                               | G (21%)                                     | G (43%)                                 | G (21%)                       |                                                    |
| 23,731,479                 | Exon 1 (Signal)  | <u>G</u> AC  | <u>G</u> AC (100%)                    | <u>A</u> AC (11%)                           | <u>A</u> AC (4%)*                       | <u>G</u> AC (100%)            | CUG→L <sub>8(sp)</sub><br>UUG→L <sub>8(sp)</sub>   |
| 23,731,453                 | Exon 1 (Signal)  | <u>C</u> AC  | <u>C</u> AC (98%)                     | <u>C</u> AC (100%)                          | <u>C</u> AT (11%)                       | <u>C</u> AC (100%)            | GUG→V <sub>16(sp)</sub><br>GUA→V <sub>16(sp)</sub> |

|            |          |            |                   |                   |                   |                   |                                            |
|------------|----------|------------|-------------------|-------------------|-------------------|-------------------|--------------------------------------------|
| 23,731,363 | Exon 1   | <u>CGG</u> | <u>CGG</u> (100%) | <u>CGA</u> (12%)  | <u>CGG</u> (100%) | <u>CGG</u> (100%) | GCC→A <sub>27</sub><br>GCU→A <sub>27</sub> |
| 23,731,354 | Exon 1   | <u>AAG</u> | <u>AAA</u> (5%)*  | <u>AAA</u> (13%)  | <u>AAG</u> (10%)  | <u>AAG</u> (10%)  | UUC→F <sub>30</sub><br>UUU→F <sub>30</sub> |
| 23,731,294 | Exon 1   | <u>CAT</u> | <u>CAA</u> (57%)  | <u>CAT</u> (100%) | <u>CAA</u> (52%)  | <u>CAT</u> (100%) | GUA→V <sub>50</sub><br>GUU→V <sub>50</sub> |
| 23,731,282 | Exon 1   | <u>TCC</u> | <u>TCC</u> (100%) | <u>TCC</u> (100%) | <u>TCI</u> (13%)  | <u>TCC</u> (100%) | AGG→R <sub>54</sub><br>AGA→R <sub>54</sub> |
| 23,731,254 | Intron 1 | C          | C (100%)          | C (100%)          | T (11%)           | C (100%)          |                                            |
| 23,731,251 | Intron 1 | C          | C (100%)          | T (6%)*           | T (13%)           | C (100%)          |                                            |
| 23,731,248 | Intron 1 | G          | G (100%)          | G (100%)          | A (11%)           | G (100%)          |                                            |
| 23,731,123 | Intron 1 | C          | G (2%)*           | T (14%)           | C (100%)          | C (100%)          |                                            |
| 23,731,102 | Intron 1 | C          | C (100%)          | T (13%)           | T (15%)           | C (100%)          |                                            |
| 23,731,048 | Intron 1 | G          | G (100%)          | A (3%)*           | A (11%)           | G (100%)          |                                            |
| 23,731,032 | Intron 1 | C          | C (100%)          | C (100%)          | T (13%)           | C (100%)          |                                            |
| 23,731,017 | Intron 1 | C          | C (100%)          | C (100%)          | T (14%)           | T (3%)*           |                                            |
| 23,731,007 | Intron 1 | C          | C (100%)          | T (4%)*           | T (11%)           | C (100%)          |                                            |
| 23,731,005 | Intron 1 | C          | C (100%)          | C (96%)           | T (14%)           | C (100%)          |                                            |
| 23,730,890 | Intron 1 | C          | C (100%)          | C (100%)          | T (14%)           | C (100%)          |                                            |
| 23,730,888 | Intron 1 | C          | C (100%)          | T (4%)*           | T (11%)           | C (100%)          |                                            |
| 23,730,886 | Intron 1 | G          | G (100%)          | A (22%)           | A (11%)           | G (100%)          |                                            |
| 23,730,885 | Intron 1 | G          | G (100%)          | A (5%)*           | A (11%)           | G (100%)          |                                            |
| 23,730,873 | Intron 1 | C          | C (100%)          | C (100%)          | T (15%)           | C (100%)          |                                            |
| 23,730,867 | Intron 1 | G          | G (100%)          | A (7%)*           | A (25%)           | G (100%)          |                                            |
| 23,730,841 | Intron 1 | C          | C (100%)          | C (100%)          | T (18%)           | C (100%)          |                                            |
| 23,730,803 | Intron 1 | C          | C (100%)          | C (100%)          | T (14%)           | C (100%)          |                                            |
| 23,730,798 | Intron 1 | C          | C (100%)          | T (11%)           | C (100%)          | C (100%)          |                                            |
| 23,730,797 | Intron 1 | C          | C (100%)          | T (6%)*           | T (13%)           | C (100%)          |                                            |
| 23,730,777 | Intron 1 | C          | C (100%)          | T (12%)           | T (5%)*           | C (100%)          |                                            |
| 23,730,775 | Intron 1 | C          | C (100%)          | T (12%)           | T (11%)           | C (100%)          |                                            |
| 23,730,772 | Intron 1 | C          | C (100%)          | T (13%)           | C (100%)          | C (100%)          |                                            |
| 23,730,761 | Intron 1 | G          | G (100%)          | A (19%)           | A (8%)*           | G (100%)          |                                            |
| 23,730,760 | Intron 1 | G          | G (100%)          | A (13%)           | A (18%)           | G (100%)          |                                            |
| 23,730,754 | Intron 1 | G          | G (100%)          | A (11%)           | G (100%)          | G (100%)          |                                            |
| 23,730,747 | Intron 1 | G          | G (100%)          | G (100%)          | A (14%)           | G (100%)          |                                            |
| 23,730,692 | Intron 1 | C          | C (100%)          | T (13%)           | T (11%)*          | C (100%)          |                                            |
| 23,730,682 | Intron 1 | C          | C (100%)          | T (13%)           | T (14%)**         | T (4%)*           |                                            |
| 23,730,677 | Intron 1 | C          | C (97%)           | T (13%)           | C (100%)          | C (100%)          |                                            |

|            |          |                          |                           |                           |                           |                           |                                            |
|------------|----------|--------------------------|---------------------------|---------------------------|---------------------------|---------------------------|--------------------------------------------|
| 23,730,674 | Intron 1 | C                        | C (100%)                  | T (13%)                   | C (100%)                  | C (100%)                  |                                            |
| 23,730,629 | Intron 1 | C                        | C (100%)                  | T (6%)*                   | T (13%)                   | C (100%)                  |                                            |
| 23,730,625 | Intron 1 | G                        | G (100%)                  | G (100%)                  | C (4%)*                   | C (32%)                   |                                            |
| 23,730,607 | Intron 1 | G                        | G (100%)                  | A (5%)*                   | A (13%)                   | G (100%)                  |                                            |
| 23,730,549 | Intron 1 | C                        | C (98%)                   | T (16%)                   | T (6%)*                   | C (97%)                   |                                            |
| 23,730,536 | Intron 1 | G                        | G (100%)                  | A (11%)                   | A (3%)*                   | G (100%)                  |                                            |
| 23,730,522 | Intron 1 | C                        | C (100%)                  | T (17%)                   | T (3%)*                   | C (100%)                  |                                            |
| 23,730,494 | Intron 1 | G                        | G (98%)                   | A (13%)                   | A (4%)*                   | G (100%)                  |                                            |
| 23,730,475 | Intron 1 | C                        | C (100%)                  | T (7%)*                   | T (11%)                   | C (100%)                  |                                            |
| 23,730,436 | Intron 1 | C                        | C (100%)                  | C (94%)                   | T (20%)                   | C (100%)                  |                                            |
| 23,730,434 | Intron 1 | C                        | C (100%)                  | C (100%)                  | T (18%)                   | C (100%)                  |                                            |
| 23,730,234 | Intron 1 | G                        | A (2%)*                   | G (100%)                  | A (18%)                   | G (100%)                  |                                            |
| 23,730,227 | Intron 1 | C                        | C (100%)                  | C (100%)                  | T (14%)                   | C (100%)                  |                                            |
| 23,730,034 | Intron 1 | G                        | G (100%)                  | G (100%)                  | A (11%)                   | G (100%)                  |                                            |
| 23,729,973 | Intron 1 | A                        | A (100%)                  | G (41%)                   | G (55%)                   | A (100%)                  |                                            |
| 23,729,898 | Intron 1 | C                        | C (100%)                  | T (13%)                   | C (100%)                  | T (5%)*                   |                                            |
| 23,729,871 | Intron 1 | C                        | T (2%)*                   | T (4%)*                   | T (11%)                   | C (100%)                  |                                            |
| 23,729,870 | Intron 1 | C                        | T (2%)*                   | T (11%)                   | C (100%)                  | C (100%)                  |                                            |
| 23,729,858 | Intron 1 | C                        | C (100%)                  | T (12%)                   | T (5%)*                   | C (100%)                  |                                            |
| 23,729,857 | Intron 1 | G                        | G (97%)                   | G (100%)                  | A (11%)                   | G (100%)                  |                                            |
| 23,729,837 | Intron 1 | G                        | G (100%)                  | G (100%)                  | G (100%)                  | A (47%)                   |                                            |
| 23,729,814 | Intron 1 | C                        | C (100%)                  | T (3%)*                   | T (11%)                   | C (100%)                  |                                            |
| 23,729,812 | Intron 1 | C                        | C (100%)                  | C (100%)                  | T (14%)                   | C (100%)                  |                                            |
| 23,729,793 | Intron 1 | G                        | A (4%)*                   | A (4%)*                   | A (14%)                   | A (4%)*                   |                                            |
| 23,729,764 | Exon 2   | <b>TG<u>G</u></b>        | TG <u>G</u> (98%)         | TG <u>A</u> (14%)         | TG <u>A</u> (4%)*         | TG <u>G</u> (100%)        | ACC→T <sub>57</sub><br>ACG→T <sub>57</sub> |
| 23,729,737 | Exon 2   | <b>CT<u>G</u></b>        | CT <u>G</u> (100%)        | CT <u>A</u> (13%)         | CT <u>A</u> (9%)*         | CT <u>A</u> (3%)*         | GAC→D <sub>66</sub><br>GAU→D <sub>66</sub> |
| 23,729,722 | Exon 2   | <b>G<u>C</u><u>G</u></b> | G <u>C</u> <u>I</u> (48%) | G <u>C</u> <u>I</u> (45%) | G <u>C</u> <u>I</u> (54%) | G <u>C</u> <u>I</u> (44%) | CGC→R <sub>71</sub><br>CGA→R <sub>71</sub> |
| 23,729,689 | Exon 2   | <b>CT<u>G</u></b>        | CT <u>G</u> (100%)        | CT <u>A</u> (3%)*         | CT <u>A</u> (13%)         | CT <u>G</u> (100%)        | GAC→D <sub>82</sub><br>GAU→D <sub>82</sub> |
| 23,729,635 | Intron 2 | C                        | C (100%)                  | T (4%)*                   | T (13%)                   | C (100%)                  |                                            |
| 23,729,616 | Intron 2 | G                        | G (100%)                  | A (11%)                   | A (3%)*                   | G (100%)                  |                                            |
| 23,729,609 | Intron 2 | C                        | C (100%)                  | C (100%)                  | T (13%)                   | C (100%)                  |                                            |
| 23,729,602 | Intron 2 | C                        | T (3%)*                   | C (100%)                  | T (13%)                   | C (100%)                  |                                            |
| 23,729,584 | Intron 2 | G                        | G (100%)                  | G (100%)                  | G (100%)                  | A (87%)                   |                                            |
| 23,729,579 | Intron 2 | T                        | G (10%)*                  | T (100%)                  | G (16%)                   | T (100%)                  |                                            |

|            |          |   |             |               |             |               |
|------------|----------|---|-------------|---------------|-------------|---------------|
| 23,729,567 | Intron 2 | C | C (100%)    | C (100%)      | T (20%)     | C (100%)      |
| 23,729,556 | Intron 2 |   | InsAC (50%) | InsAC (40%)** | InsAC (23%) | InsAC (56%)** |
| 23,729,550 | Intron 2 | C | C (100%)    | C (100%)      | A (20%)     | C (100%)      |
| 23,729,549 | Intron 2 | C | C (100%)    | C (100%)      | A (20%)     | C (100%)      |
| 23,729,544 | Intron 2 | C | T (26%)     | C (100%)**    | T (33%)*    | C (100%)**    |
| 23,729,514 | Intron 2 | C | T (31%)     | T (14%)**     | T (17%)**   | T (25%)**     |
| 23,729,500 | Intron 2 | T | C (42%)     | C (45%)       | C (56%)**   | C (30%)       |
| 23,729,496 | Intron 2 | C | T (48%)     | T (55%)       | T (50%)**   | T (45%)       |
| 23,729,486 | Intron 2 | T | G (63%)     | G (54%)       | G (63%)**   | G (62%)       |
| 23,729,484 | Intron 2 | C | C (100%)    | T (13%)       | T (9%)*     | C (100%)      |
| 23,729,481 | Intron 2 | C | C (100%)    | T (7%)*       | T (17%)     | C (100%)      |
| 23,729,464 | Intron 2 | C | C (100%)    | T (12%)       | C (100%)    | T (5%)*       |
| 23,729,449 | Intron 2 | G | G (100%)    | A (13%)       | G (100%)    | G (100%)      |
| 23,729,373 | Intron 2 | G | G (100%)    | G (92%)       | T (60%)     | G (100%)      |
| 23,729,337 | Intron 2 | A | A (100%)    | G (70%)       | G (26%)     | A (100%)      |
| 23,729,302 | Intron 2 | C | C (100%)    | T (13%)       | T (5%)*     | C (97%)       |
| 23,729,301 | Intron 2 | C | C (100%)    | T (13%)       | C (100%)    | C (96%)       |
| 23,729,299 | Intron 2 | C | C (100%)    | T (13%)       | C (100%)    | T (4%)*       |
| 23,729,298 | Intron 2 | C | C (100%)    | T (13%)       | T (5%)*     | C (100%)      |
| 23,729,296 | Intron 2 | C | C (100%)    | T (13%)       | T (11%)     | C (97%)       |
| 23,729,287 | Intron 2 | C | C (100%)    | T (6%)*       | T (11%)     | C (100%)      |
| 23,729,286 | Intron 2 | C | C (100%)    | T (6%)*       | T (11%)     | C (100%)      |
| 23,729,264 | Intron 2 | C | C (100%)    | C (100%)      | T (17%)     | C (100%)      |
| 23,729,253 | Intron 2 | C | C (100%)    | T (3%)*       | T (17%)     | C (100%)      |
| 23,729,232 | Intron 2 | C | C (100%)    | T (5%)*       | T (13%)     | C (100%)      |
| 23,729,187 | Intron 2 | C | A (100%)    | A (100%)**    | A (100%)**  | A (100%)**    |
| 23,729,184 | Intron 2 | C | G (100%)    | G (100%)**    | G (100%)**  | G (100%)**    |
| 23,729,134 | Intron 2 | G | C (100%)    | C (93%)       | C (90%)     | C (100%)      |
| 23,729,117 | Intron 2 | G | G (100%)    | A (11%)       | A (4%)*     | G (100%)      |
| 23,729,090 | Intron 2 | A | A (100%)    | A (100%)      | A (100%)    | G (76%)       |
| 23,729,056 | Intron 2 | C | C (100%)    | C (100%)      | T (12%)     | C (100%)      |
| 23,729,045 | Intron 2 | G | G (100%)    | A (11%)       | G (100%)    | G (100%)      |
| 23,729,041 | Intron 2 | G | G (100%)    | A (6%)*       | A (13%)     | G (100%)      |
| 23,729,029 | Intron 2 | G | G (98%)     | G (96%)       | A (14%)     | G (100%)      |
| 23,728,986 | Intron 2 | C | T (87%)     | T (74%)       | T (64%)     | C (100%)      |

|            |          |     |            |           |           |            |                      |
|------------|----------|-----|------------|-----------|-----------|------------|----------------------|
| 23,728,979 | Intron 2 | T   | C (6%)*    | C (43%)   | C (9%)*   | T (100%)   |                      |
| 23,728,951 | Intron 2 | G   | G (100%)   | A (13%)   | G (100%)  | G (100%)   |                      |
| 23,728,934 | Intron 2 | C   | C (100%)   | T (4%)*   | T (15%)   | C (100%)   |                      |
| 23,728,927 | Intron 2 | G   | G (98%)    | G (100%)  | A (12%)   | G (100%)   |                      |
| 23,728,925 | Intron 2 | G   | G (100%)   | A (13%)   | G (100%)  | G (100%)   |                      |
| 23,728,910 | Intron 2 | G   | G (100%)   | A (14%)   | A (4%)*   | G (100%)   |                      |
| 23,728,909 | Intron 2 | G   | G (100%)   | A (11%)   | A (9%)*   | G (100%)   |                      |
| 23,728,893 | Intron 2 | C   | C (100%)   | T (13%)   | T (11%)   | C (100%)   |                      |
| 23,728,890 | Intron 2 | G   | G (100%)   | A (12%)   | G (100%)  | G (100%)   |                      |
| 23,728,882 | Intron 2 | C   | T (87%)    | T (65%)   | T (68%)   | C (100%)   |                      |
| 23,728,881 | Intron 2 | C   | C (100%)   | T (6%)*   | T (11%)   | C (100%)   |                      |
| 23,728,878 | Intron 2 | G   | G (100%)   | G (100%)  | A (11%)   | G (100%)   |                      |
| 23,728,873 | Intron 2 | C   | T (2%)*    | C (100%)  | T (11%)   | C (100%)   |                      |
| 23,728,872 | Intron 2 | C   | C (100%)   | T (5%)*   | T (13%)   | C (100%)   |                      |
| 23,728,805 | Intron 2 | G   | G (100%)   | A (13%)   | A (11%)   | G (100%)   |                      |
| 23,728,797 | Intron 2 | T   | C (11%)    | T (100%)  | C (25%)   | T (100%)   |                      |
| 23,728,751 | Intron 2 | C   | C (100%)   | T (4%)*   | T (11%)   | C (100%)   |                      |
| 23,728,749 | Intron 2 | C   | C (98%)    | T (11%)   | C (100%)  | C (100%)   |                      |
| 23,728,719 | Intron 2 | A   | A (95%)    | A (96%)   | A (100%)  | delA (21%) |                      |
| 23,728,687 | Intron 2 | G   | G (98%)    | A (5%)*   | A (14%)   | G (100%)   |                      |
| 23,728,661 | Intron 2 | C   | C (100%)   | T (11%)   | C (100%)  | C (100%)   |                      |
| 23,728,658 | Intron 2 | C   | C (100%)   | T (6%)*   | T (20%)   | C (100%)   |                      |
| 23,728,656 | Intron 2 | C   | C (100%)   | T (6%)*   | T (13%)   | C (100%)   |                      |
| 23,728,649 | Intron 2 | C   | C (100%)   | C (100%)  | T (11%)   | C (100%)   |                      |
| 23,728,648 | Intron 2 | C   | C (100%)   | T (9%)*   | T (18%)   | C (100%)   |                      |
| 23,728,641 | Intron 2 | C   | T (8%)*    | T (5%)*   | T (14%)   | C (100%)   |                      |
| 23,728,639 | Intron 2 | G   | G (100%)   | G (100%)  | A (13%)   | G (100%)   |                      |
| 23,728,635 | Intron 2 | G   | G (100%)   | A (12%)   | A (15%)   | G (100%)   |                      |
| 23,728,557 | Intron 2 | G   | G (100%)   | A (11%)   | A (9%)*   | G (100%)   |                      |
| 23,728,556 | Intron 2 | G   | G (100%)   | A (11%)   | A (9%)*   | G (100%)   |                      |
| 23,728,550 | Intron 2 | G   | G (100%)   | G (100%)  | A (15%)   | G (100%)   |                      |
| 23,728,547 | Intron 2 | G   | G (100%)   | A (11%)   | A (4%)*   | G (100%)   |                      |
| 23,728,546 | Intron 2 | G   | G (100%)   | A (11%)   | G (100%)  | G (100%)   |                      |
| 23,728,486 | Exon 3   | TCC | TCC (100%) | TCT (4%)* | TCT (17%) | TCC (100%) | AGG→R111<br>AGA→R111 |

|            |                    |   |          |            |          |            |
|------------|--------------------|---|----------|------------|----------|------------|
| 23,728,419 | 3'UTR              | G | G (100%) | G (100%)   | A (20%)  | G (100%)   |
| 23,728,418 | 3'UTR              | G | G (100%) | A (10%)*   | A (20%)  | G (100%)   |
| 23,728,417 | 3'UTR              | G | G (100%) | A (27%)    | G (100%) | G (100%)   |
| 23,728,359 | 3'UTR              | C | A (15%)  | A (22%)**  | A (13%)  | C (100%)   |
| 23,728,341 | 3'UTR              | C | C (100%) | C (100%)   | T (11%)  | C (95%)    |
| 23,728,332 | 3'UTR              | G | G (100%) | G (100%)   | A (11%)  | G (100%)   |
| 23,728,314 | 3'UTR              | C | C (100%) | C (100%)   | T (13%)  | C (100%)   |
| 23,728,301 | 3'UTR              | C | C (100%) | T (15%)    | C (100%) | C (100%)   |
| 23,728,291 | 3'UTR              | C | C (100%) | T (12%)    | C (100%) | C (100%)   |
| 23,728,238 | 3'UTR              | G | G (100%) | G (100%)   | A (14%)  | G (100%)   |
| 23,728,233 | 3'UTR              | G | T (100%) | T (89%)**  | T (90%)  | T (100%)** |
| 23,728,222 | 3'UTR              | G | G (100%) | G (100%)   | A (14%)  | G (100%)   |
| 23,728,157 | Downstream regions | C | T (100%) | T (100%)** | T (100%) | T (100%)   |
| 23,728,128 | Downstream regions | G | G (96%)  | A (14%)    | G (100%) | G (100%)   |
| 23,728,103 | Downstream regions | G | C (25%)  | C (35%)    | C (42%)  | G (100%)   |
| 23,728,101 | Downstream regions | C | C (100%) | C (100%)   | T (13%)  | C (100%)   |
| 23,728,094 | Downstream regions | G | G (100%) | A (3%)*    | A (14%)  | G (100%)   |
| 23,728,083 | Downstream regions | G | A (23%)  | A (25%)    | A (43%)  | A (5%)*    |
| 23,728,058 | Downstream regions | C | T (3%)*  | T (38%)    | T (60%)  | C (100%)   |
| 23,728,056 | Downstream regions | C | C (100%) | C (100%)   | T (15%)  | C (100%)   |
| 23,728,055 | Downstream regions | G | G (100%) | G (100%)   | A (15%)  | G (94%)    |
| 23,727,966 | Downstream regions | C | T (3%)*  | T (11%)    | C (100%) | C (100%)   |
| 23,727,961 | Downstream regions | C | T (8%)*  | C (100%)   | T (13%)  | C (100%)   |
| 23,727,953 | Downstream regions | C | C (100%) | T (10%)*   | T (14%)  | C (100%)   |
| 23,727,940 | Downstream regions | G | G (100%) | A (12%)    | A (5%)*  | G (100%)   |
| 23,727,928 | Downstream regions | G | G (100%) | A (26%)    | G (100%) | G (100%)   |
| 23,727,927 | Downstream regions | G | G (100%) | A (11%)    | A (4%)*  | G (100%)   |
| 23,727,917 | Downstream regions | T | C (100%) | C (100%)   | C (100%) | C (100%)** |
| 23,727,909 | Downstream regions | C | C (100%) | C (100%)   | T (13%)  | C (100%)   |
| 23,727,891 | Downstream regions | C | C (100%) | C (100%)   | T (20%)  | C (100%)   |
| 23,727,890 | Downstream regions | C | C (100%) | C (100%)   | T (13%)  | C (100%)   |
| 23,727,884 | Downstream regions | G | G (100%) | A (13%)    | G (100%) | G (100%)   |
| 23,727,875 | Downstream regions | C | C (100%) | T (5%)*    | T (13%)  | C (100%)   |

|            |                    |   |          |                    |          |          |
|------------|--------------------|---|----------|--------------------|----------|----------|
| 23,727,874 | Downstream regions | C | C (100%) | C (100%)           | T (25%)  | C (100%) |
| 23,727,849 | Downstream regions | C | C (97%)  | T (12%)            | C (100%) | C (100%) |
| 23,727,828 | Downstream regions | C | G (96%)  | G (91%)            | G (90%)  | G (95%)  |
| 23,727,761 | Downstream regions | T | T (100%) | C (13%)            | T (100%) | T (100%) |
| 23,727,757 | Downstream regions | G | G (100%) | A (4%)*            | A (12%)  | G (100%) |
| 23,727,756 | Downstream regions | G | G (100%) | A (4%)*            | A (16%)  | G (100%) |
| 23,727,735 | Downstream regions | G | A (100%) | A (100%)           | A (100%) | G (100%) |
| 23,727,707 | Downstream regions | C | C (100%) | T (12%)            | C (100%) | C (100%) |
| 23,727,697 | Downstream regions | T | G (100%) | G (86%)<br>A (14%) | G (92%)  | G (100%) |
| 23,727,695 | Downstream regions | G | G (100%) | A (14%)            | A (4%)*  | G (100%) |
| 23,727,628 | Downstream regions | C | C (100%) | T (4%)*            | T (11%)  | C (100%) |

n.a.: not available; the variant frequency is referred to the percentage of the highlighted base in the sequenced ancient hominine genome, with\* frequency≤10% and \*\* counts<10. In light orange are underlined the variants fixed at 100% in modern human compared to ancient hominines.
