# Supplementary material for: A Catalog of Coding Sequence Variations in Salivary Proteins’ Genes Occurring during Recent Human Evolution
Source: MDPI journal article supplement (doi:10.3390/ijms241915010), 2023-10-09
Supplement: s1 [file s1]

Table S1. Nucleotide Substitutions in *PRB1* gene in introns and regulatory regions

| Genomic Coordinates (hg19) | Gene Region      | Modern human | Altai Neanderthal (Variant Frequency) | Chagyrskaya Neanderthal (Variant Frequency) | Vindija Neanderthal (Variant Frequency) | Denisovan (Variant Frequency) | Codon → amino acid                               |
|----------------------------|------------------|--------------|---------------------------------------|---------------------------------------------|-----------------------------------------|-------------------------------|--------------------------------------------------|
| 11,508,879                 | Upstream regions | G            | C (10%) *                             | C (15%)                                     | C (26%)                                 | C (26%)                       |                                                  |
| 11,508,854                 | Upstream regions | C            | C (100%)                              | T (11%)                                     | T (3%) *                                | C (100%)                      |                                                  |
| 11,508,728                 | Upstream regions | G            | A (1%)*                               | A (13%)                                     | A (7 %)*                                | G (100%)                      |                                                  |
| 11,508,703                 | Upstream regions | G            | G (100%)                              | A (11%)                                     | A (6%)*                                 | G (100%)                      |                                                  |
| 11,508,622                 | Upstream regions | C            | C (100%)                              | T (2%)*                                     | T (13%)                                 | T (2%)*                       |                                                  |
| 11,508,557                 | Upstream regions | G            | G (100%)                              | G (100%)                                    | A (11%)                                 | G (100%)                      |                                                  |
| 11,508,523                 | 5' UTR           | G            | G (100%)                              | G (100%)                                    | A (11%)                                 | G (100%)                      |                                                  |
| 11,508,460                 | Exon 1 (Signal)  | <u>A</u> AC  | <u>G</u> AC (27%)                     | <u>G</u> AC (17%)                           | <u>G</u> AC (34%)                       | <u>G</u> AC (31%)             | UUG→L <sub>9(sp)</sub><br>CUG→L <sub>9(sp)</sub> |
| 11,508,383                 | Intron 1         | C            | C (100%)                              | C (100%)                                    | T (11%)                                 | C (100%)                      |                                                  |
| 11,508,382                 | Intron 1         | C            | C (98%)                               | T (12%)                                     | T (6%)*                                 | C (100%)                      |                                                  |
| 11,508,345                 | Intron 1         | C            | C (97%)                               | T (13%)                                     | C (100%)                                | C (100%)                      |                                                  |
| 11,508,296                 | Intron 1         | C            | C (100%)                              | T (13%)                                     | T (4%)*                                 | C (100%)                      |                                                  |
| 11,508,289                 | Intron 1         | C            | C (100%)                              | T (14%)                                     | T (5%)*                                 | C (100%)                      |                                                  |
| 11,508,283                 | Intron 1         | G            | G (100%)                              | A (11%)                                     | A (12%)                                 | G (100%)                      |                                                  |
| 11,508,217                 | Intron 1         | G            | G (100%)                              | G (100%)                                    | A (11%)                                 | G (100%)                      |                                                  |
| 11,508,167                 | Intron 1         | C            | C (98%)                               | C (100%)                                    | T (11%)                                 | C (100%)                      |                                                  |
| 11,508,026                 | Intron 1         | C            | C (100%)                              | C (100%)                                    | T (13%)                                 | C (100%)                      |                                                  |
| 11,508,014                 | Intron 1         | G            | G (100%)                              | A (11%)                                     | G (100%)                                | G (100%)                      |                                                  |
| 11,507,986                 | Intron 1         | G            | G (100%)                              | A (12%)                                     | A (10%)*                                | G (100%)                      |                                                  |
| 11,507,916                 | Intron 1         | G            | G (100%)                              | A (11%)                                     | A (7%)*                                 | G (100%)                      |                                                  |
| 11,507,833                 | Intron 1         | C            | C (100%)                              | C (100%)                                    | T (11%)                                 | C (100%)                      |                                                  |
| 11,507,830                 | Intron 1         | G            | G (98%)                               | G (100%)                                    | A (11%)                                 | G (100%)                      |                                                  |
| 11,507,811                 | Intron 1         | C            | C (100%)                              | C (100%)                                    | T (11%)                                 | C (100%)                      |                                                  |
| 11,507,810                 | Intron 1         | C            | C (100%)                              | C (100%)                                    | T (11%)                                 | C (100%)                      |                                                  |
| 11,507,801                 | Intron 1         | C            | C (100%)                              | C (100%)                                    | T (11%)                                 | C (100%)                      |                                                  |
| 11,507,768                 | Intron 1         | G            | G (100%)                              | A (15%)                                     | A (5%)*                                 | G (100%)                      |                                                  |
| 11,507,652                 | Intron 1         | G            | G (100%)                              | G (100%)                                    | A (14%)                                 | G (100%)                      |                                                  |
| 11,507,607                 | Intron 1         | G            | G (100%)                              | G (100%)                                    | A (16%)                                 | G (100%)                      |                                                  |
| 11,507,594                 | Intron 1         | C            | C (100%)                              | T (11%)                                     | C (100%)                                | C (100%)                      |                                                  |
| 11,507,592                 | Intron 1         | C            | C (97%)                               | T (14%)                                     | C (100%)                                | C (100%)                      |                                                  |
| 11,507,584                 | Intron 1         | C            | C (100%)                              | T (11%)                                     | C (100%)                                | C (100%)                      |                                                  |

|            |                  |             |                      |                   |                    |                    |                                              |
|------------|------------------|-------------|----------------------|-------------------|--------------------|--------------------|----------------------------------------------|
| 11,507,578 | Intron 1         | G           | G (100%)             | G (100%)          | A (13%)            | G (100%)           |                                              |
| 11,507,536 | Intron 1         | T           | A (16%)              | A (27%)           | A (18%)            | A (20%)            |                                              |
| 11,507,532 | Intron 1         | C           | C (100%)             | T (23%)           | T (8%)*            | C (100%)           |                                              |
| 11,507,236 | Intron 2         | C           | C (100%)             | T (4%)*           | T (11%)            | C (100%)           |                                              |
| 11,507,234 | Intron 2         | C           | C (100%)             | T (14%)           | T (8%)*            | C (100%)           |                                              |
| 11,507,230 | Intron 2         | C           | T (3%)*              | T (13%)           | C (100%)           | C (100%)           |                                              |
| 11,507,214 | Intron 2         | C           | T (2%)*              | T (15%)           | C (100%)           | C (100%)           |                                              |
| 11,507,202 | Intron 2         | G           | T (100%)             | T (100%)          | T (100%)           | T (100%)           |                                              |
| 11,507,199 | Intron 2         | G           | G (100%)             | A (13%)           | G (100%)           | G (100%)           |                                              |
| 11,507,196 | Intron 2         | C           | C (100%)             | T (11%)           | T (8%)*            | C (100%)           |                                              |
| 11,507,180 | Intron 2         | C           | C (100%)             | T (4%)*           | T (14%)            | C (100%)           |                                              |
| 11,507,074 | Intron 2         | A           | C (100%)             | C (100%)          | C (98%)            | C (100%)           |                                              |
| 11,506,905 | Exon 3<br>(II-2) | CC <u>G</u> | CC <u>G</u> (100%)   | CC <u>A</u> (11%) | CC <u>A</u> (4%)*  | CC <u>G</u> (100%) | GGC→G <sub>28</sub><br>GGU→G <sub>28</sub>   |
| 11,506,887 | Exon 3<br>(II-2) | GG <u>G</u> | GG <u>G</u> (100%)   | GG <u>A</u> (11%) | GG <u>G</u> (100%) | GG <u>G</u> (100%) | CCC→P <sub>34</sub><br>CCU→P <sub>34</sub>   |
| 11,506,794 | Exon 3<br>(II-2) | GG <u>G</u> | GG <u>G</u> (100%)   | GG <u>A</u> (12%) | GG <u>G</u> (100%) | GG <u>G</u> (100%) | CCC→P <sub>65</sub><br>CCU→P <sub>65</sub>   |
| 11,506,785 | Exon 3<br>(II-2) | CC <u>C</u> | CCT (4%)*            | CCT (17%)         | CC <u>C</u> (100%) | CCT (5%)*          | GGG→G <sub>68</sub><br>GGA→G <sub>68</sub>   |
| 11,506,749 | Exon 3<br>(P-E)  | TT <u>T</u> | TT <u>C</u> (17%)    | TT <u>C</u> (9%)* | TT <u>T</u> (100%) | TT <u>C</u> (10%)* | AAA→K <sub>5</sub><br>AAG→K <sub>5</sub>     |
| 11,506,533 | Exon 3<br>(Ps-1) | GT <u>T</u> | GTC (5%)*            | GTC (5%)*         | GTC (4%)*          | GTC (14%)          | CAA→Q <sub>16</sub><br>CAG→Q <sub>16</sub>   |
| 11,506,356 | Exon 3<br>(Ps-1) | CC <u>G</u> | CC <u>G</u> (100%)   | CC <u>A</u> (17%) | CC <u>A</u> (17%)  | CC <u>A</u> (12%)  | GGC→G <sub>75</sub><br>GGU→G <sub>75</sub>   |
| 11,506,260 | Exon 3<br>(Ps-1) | TT <u>C</u> | TT <u>C</u> (100%)** | TT <u>T</u> (18%) | TT <u>C</u> (100%) | TT <u>C</u> (100%) | AAG→K <sub>107</sub><br>AAA→K <sub>107</sub> |
| 11,506,245 | Exon 3<br>(Ps-1) | GG <u>G</u> | GG <u>G</u> (100%)** | GG <u>A</u> (18%) | GG <u>A</u> (6%)*  | GG <u>G</u> (100%) | CCC→P <sub>112</sub><br>CCU→P <sub>112</sub> |
| 11,506,040 | 3' UTR           | G           | G (100%)             | A (5%)*           | A (13%)            | G (100%)           |                                              |
| 11,505,908 | Intron 3         | C           | C (100%)             | T (11%)           | T (5%)*            | C (100%)           |                                              |
| 11,505,736 | Intron 3         | G           | G (98%)              | A (13%)           | G (90%)            | G (100%)           |                                              |
| 11,505,708 | Intron 3         | G           | A (1%)*              | A (12%)           | A (6%)*            | G (100%)           |                                              |
| 11,505,389 | Intron 3         | G           | G (100%)             | A (14%)           | G (100%)           | G (100%)           |                                              |
| 11,505,375 | Intron 3         | G           | A (65%)              | A (59%)           | A (59%)            | A (47%)            |                                              |
| 11,505,362 | Intron 3         | G           | G (100%)             | G (100%)          | A (11%)            | G (100%)           |                                              |
| 11,505,347 | Intron 3         | C           | C (100%)             | T (11%)           | C (100%)           | C (100%)           |                                              |
| 11,505,277 | Intron 3         | C           | C (100%)             | T (2%)*           | T (14%)            | T (2%)*            |                                              |
| 11,505,249 | Intron 3         | G           | A (2%)*              | A (3%)*           | A (17%)            | G (100%)           |                                              |
| 11,505,246 | Intron 3         | G           | A (2%)*              | A (8%)*           | A (12%)            | G (100%)           |                                              |
| 11,505,168 | Intron 3         | C           | C (100%)             | T (13%)           | T (5%)*            | C (100%)           |                                              |
| 11,505,069 | Intron 3         | G           | A (58%)              | A (46%)           | A (51%)            | A (49%)            |                                              |

|            |                    |   |          |          |          |          |
|------------|--------------------|---|----------|----------|----------|----------|
| 11,504,999 | Intron 3           | C | C (100%) | T (4%)*  | T (21%)  | C (100%) |
| 11,504,988 | Intron 3           | C | C (99%)  | T (11%)  | C (100%) | C (100%) |
| 11,504,987 | Intron 3           | C | T (1%)*  | T (4%)*  | T (17%)  | C (100%) |
| 11,504,980 | Intron 3           | C | C (100%) | T (12%)  | C (100%) | C (100%) |
| 11,504,970 | Intron 3           | C | C (100%) | T (12%)  | C (100%) | C (100%) |
| 11,504,952 | Intron 3           | C | C (100%) | C (100%) | T (15%)  | C (100%) |
| 11,504,942 | Intron 3           | C | C (100%) | C (100%) | T (13%)  | C (100%) |
| 11,504,691 | Downstream regions | C | C (100%) | T (13%)  | T (7%)*  | C (100%) |
| 11,504,589 | Downstream regions | G | G (100%) | A (12%)  | A (5%)*  | G (100%) |
| 11,504,563 | Downstream regions | G | G (100%) | A (13%)  | A (13%)  | G (100%) |
| 11,504,561 | Downstream regions | G | G (100%) | G (100%) | A (17%)  | G (100%) |
| 11,504,548 | Downstream regions | C | C (100%) | C (100%) | T (12%)  | C (100%) |
| 11,504,493 | Downstream regions | G | G (100%) | A (11%)  | A (4%)*  | G (100%) |
| 11,504,491 | Downstream regions | G | G (100%) | A (12%)  | A (4%)*  | G (100%) |
| 11,504,470 | Downstream regions | G | G (100%) | A (13%)  | G (100%) | G (100%) |
| 11,504,425 | Downstream regions | A | G (100%) | G (96%)  | G (91%)  | G (100%) |
| 11,504,388 | Downstream regions | C | T (3%)*  | T (5%)*  | T (13%)  | C (100%) |
| 11,504,360 | Downstream regions | G | G (98%)  | A (17%)  | G (100%) | G (100%) |
| 11,504,295 | Downstream regions | C | C (100%) | C (100%) | T (14%)  | C (100%) |
| 11,504,272 | Downstream regions | G | G (100%) | G (100%) | A (23%)  | G (100%) |

n.a.: not available; the variant frequency is referred to the percentage of the highlighted base in the sequenced ancient hominine genome, with\* frequency≤10% and \*\* counts<10. In light orange are underlined the variants fixed at 100% in modern human compared to ancient hominines.
