# Supplementary material for: A Catalog of Coding Sequence Variations in Salivary Proteins’ Genes Occurring during Recent Human Evolution
Source: MDPI journal article supplement (doi:10.3390/ijms241915010), 2023-10-09

**PBS (Population Branch Statistics) plot of basic proline rich proteins and cysteine proteases.** The dotted and continuous lines represent the empirical reference values at the 99.5th and 99.9th percentile respectively, so that the PBS values above these lines indicate significant values.

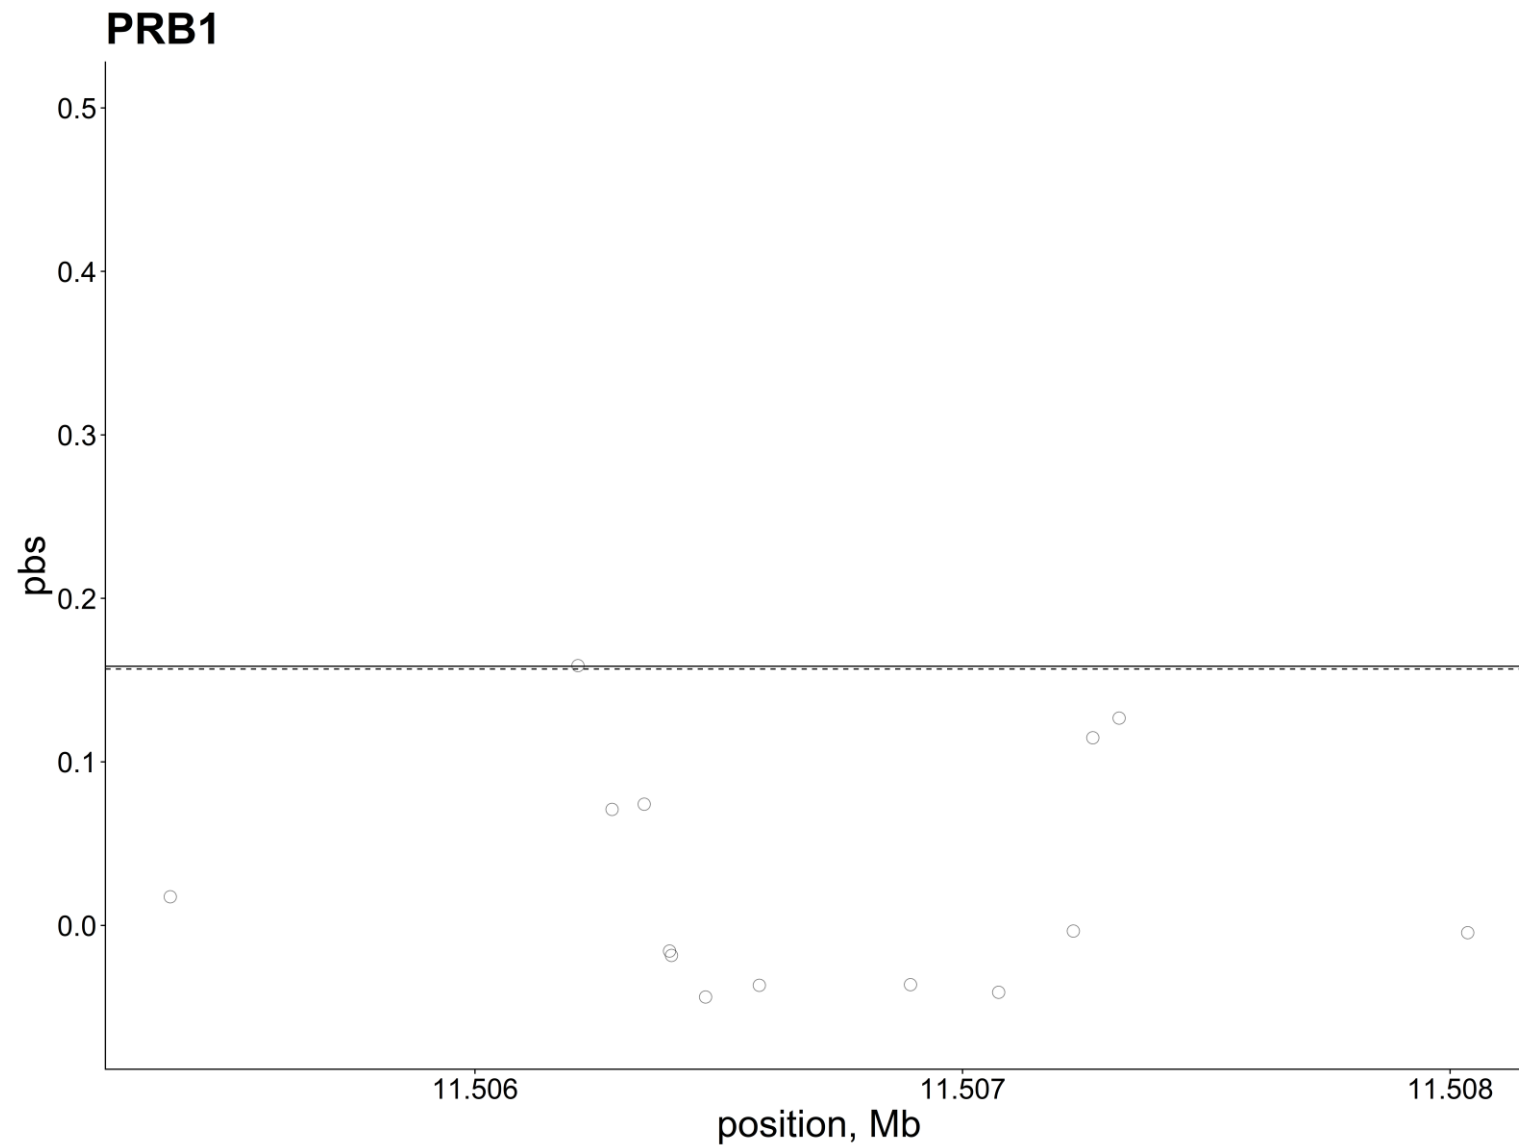

**PRB2**

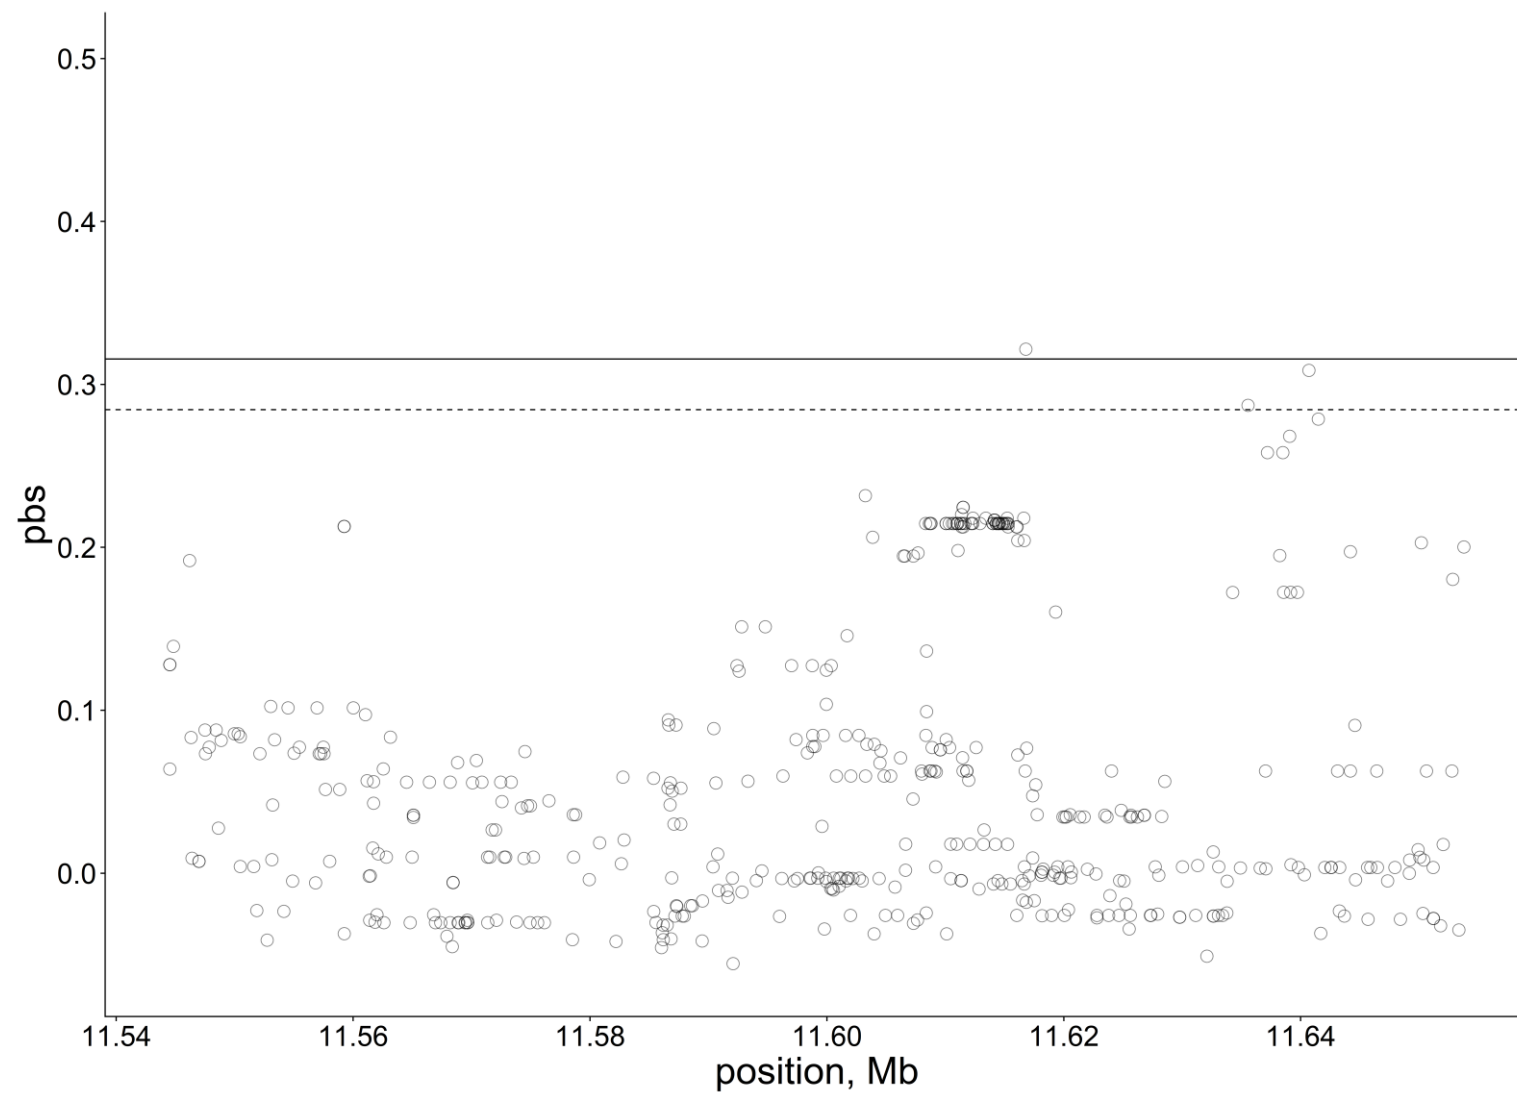

**PRB3**

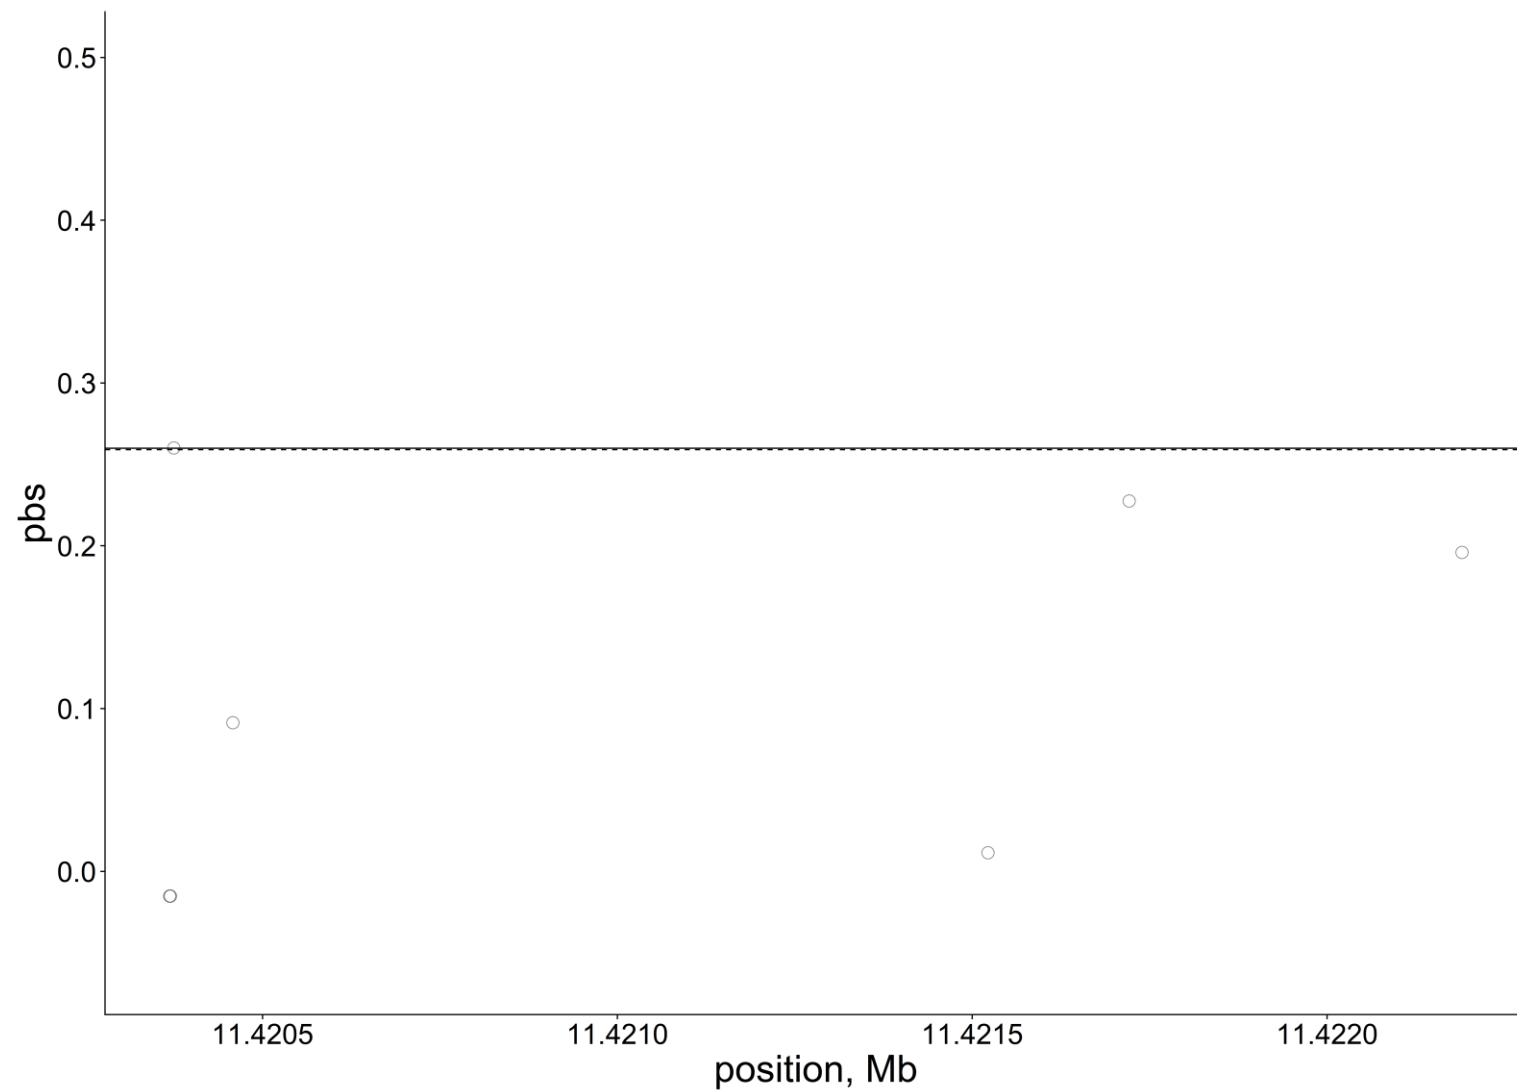

**PRB4**

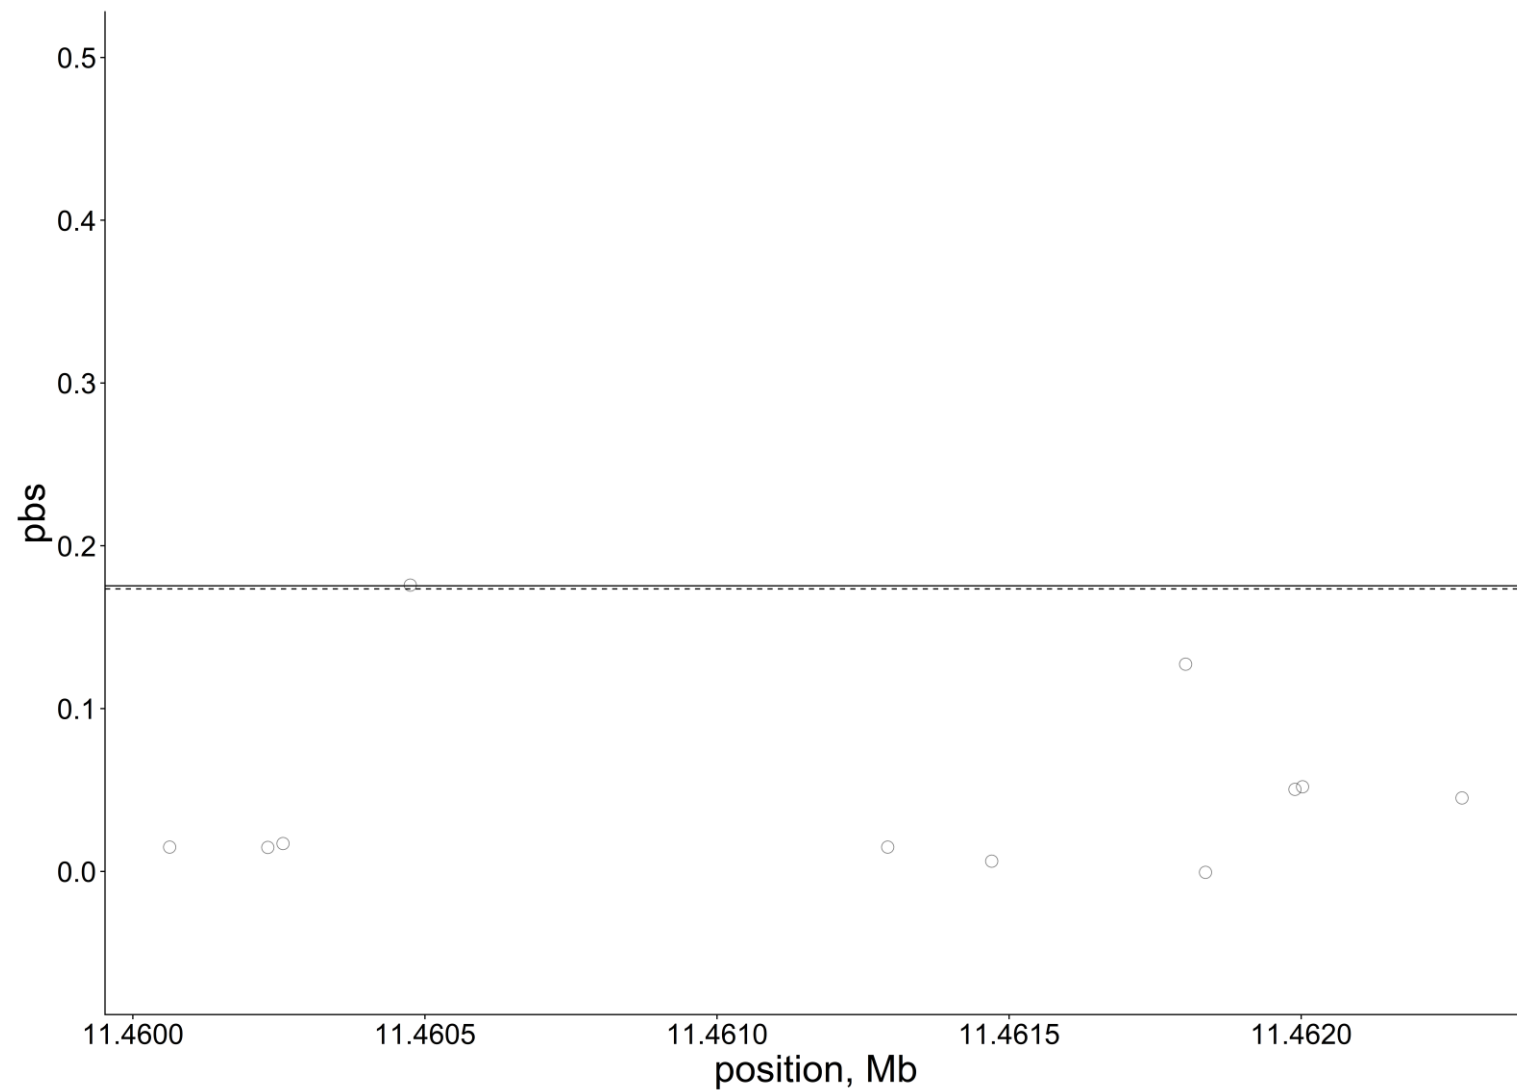

**CST1**

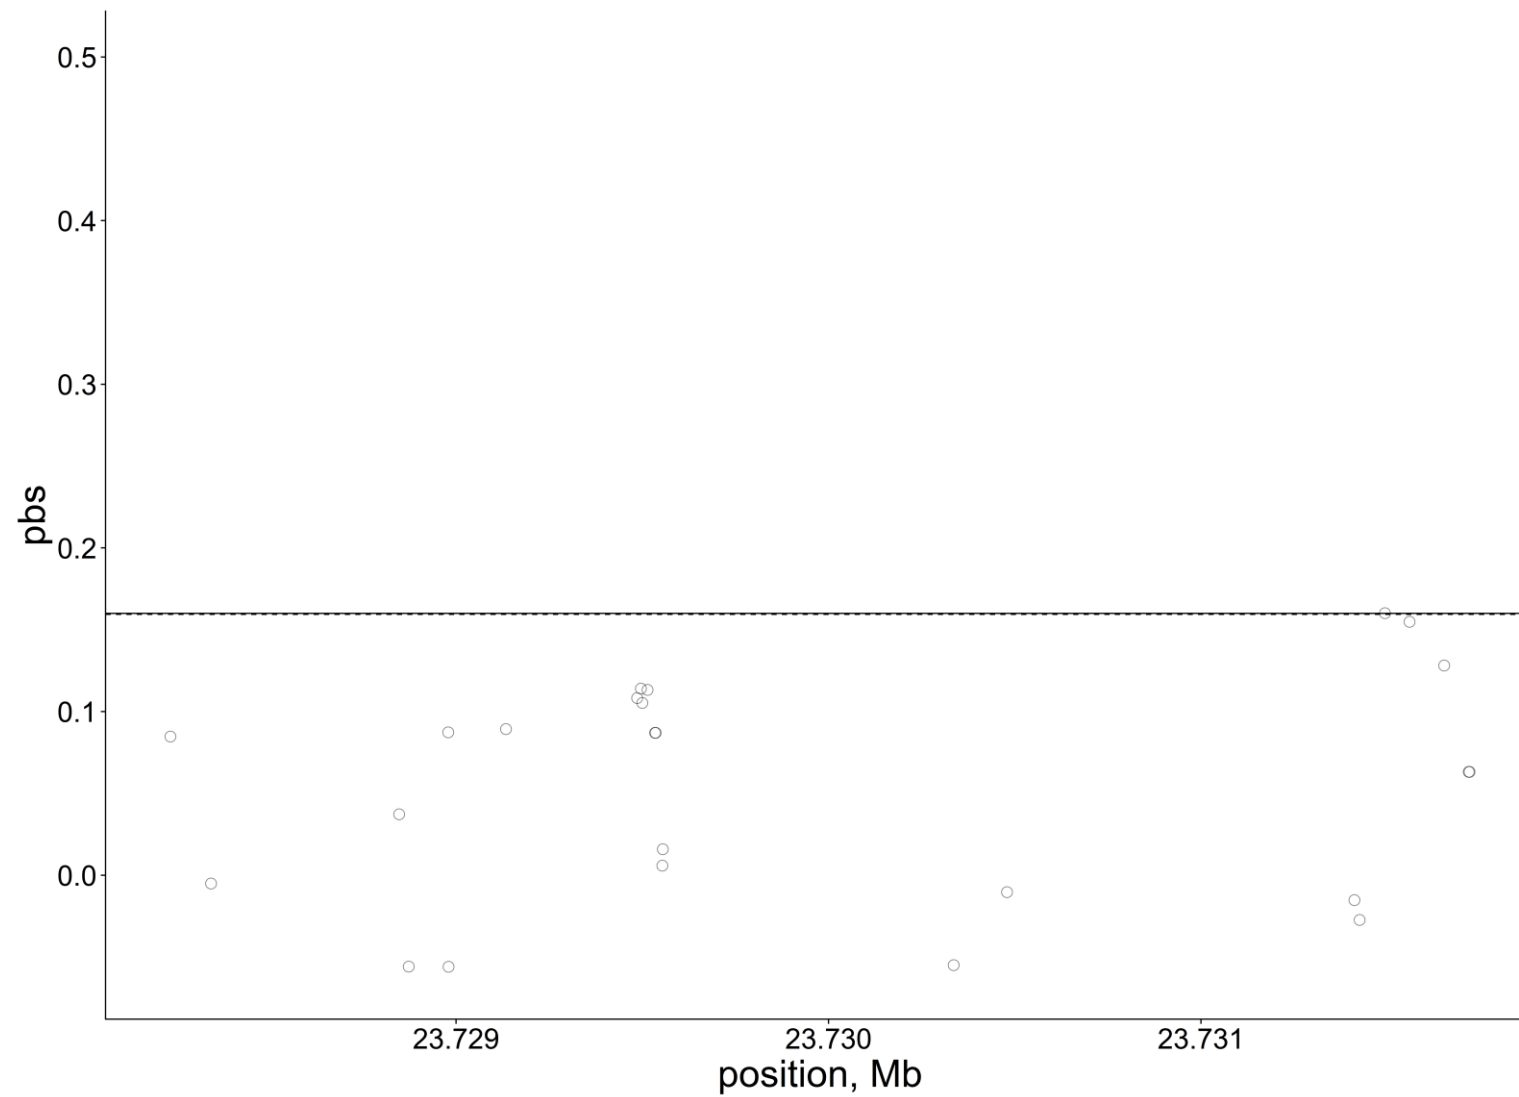

**CST2**

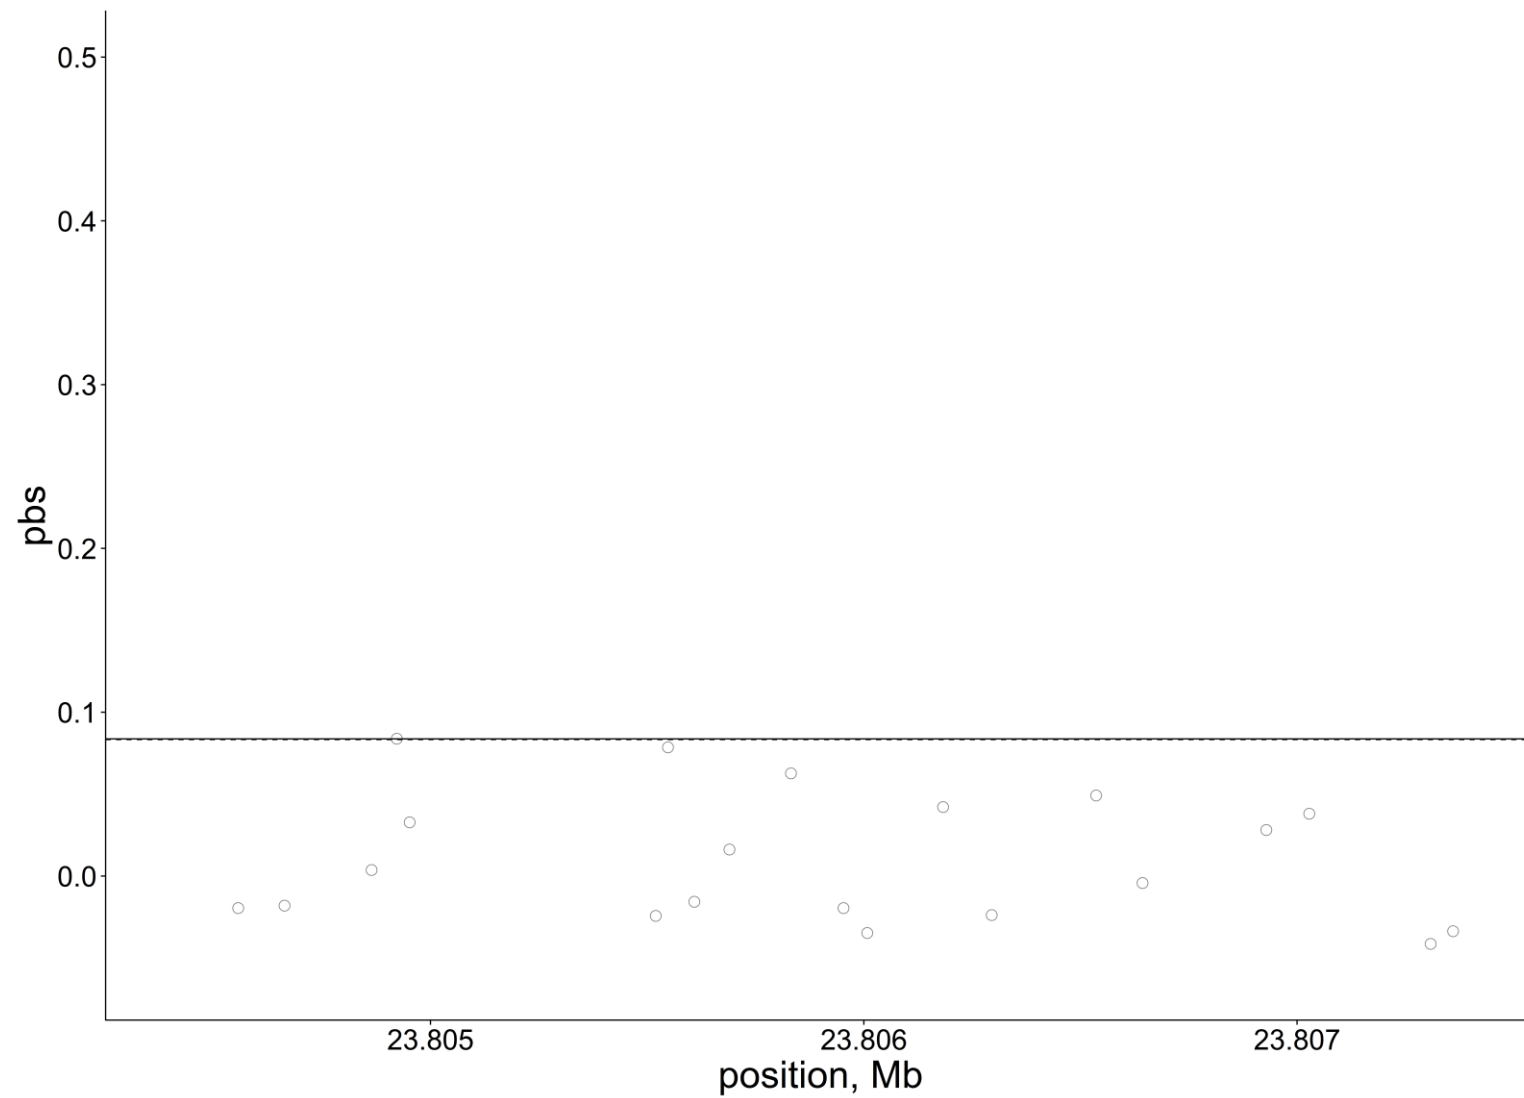

# CST3

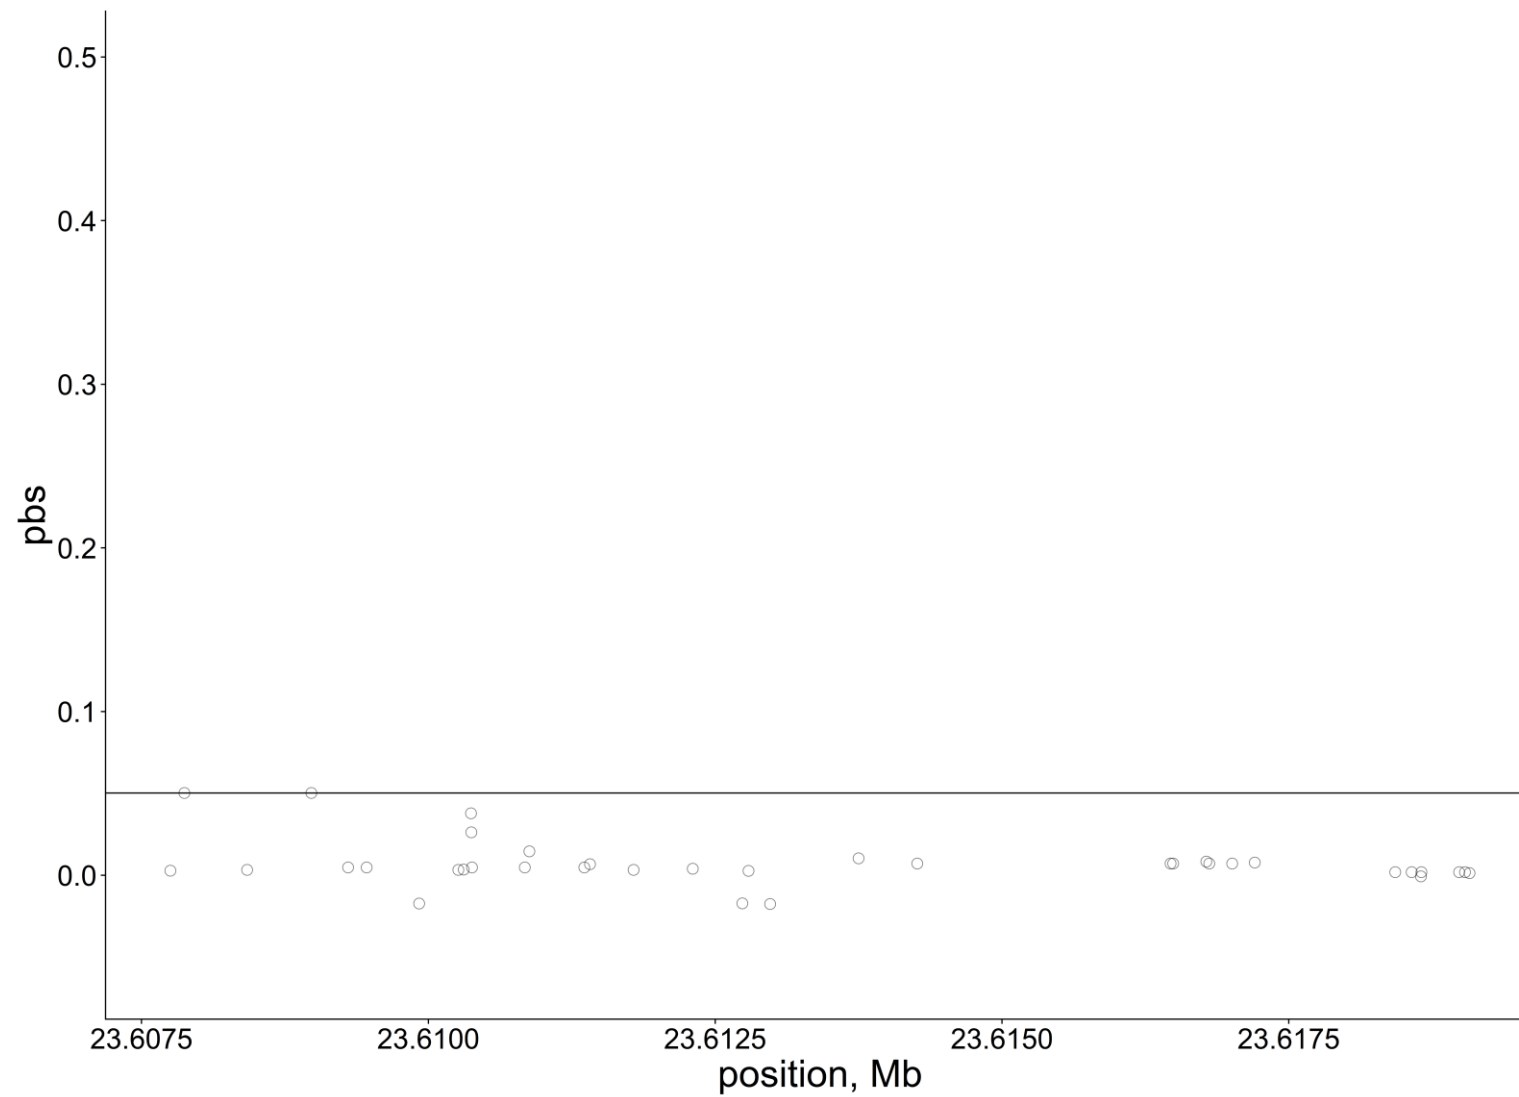

**CST4**

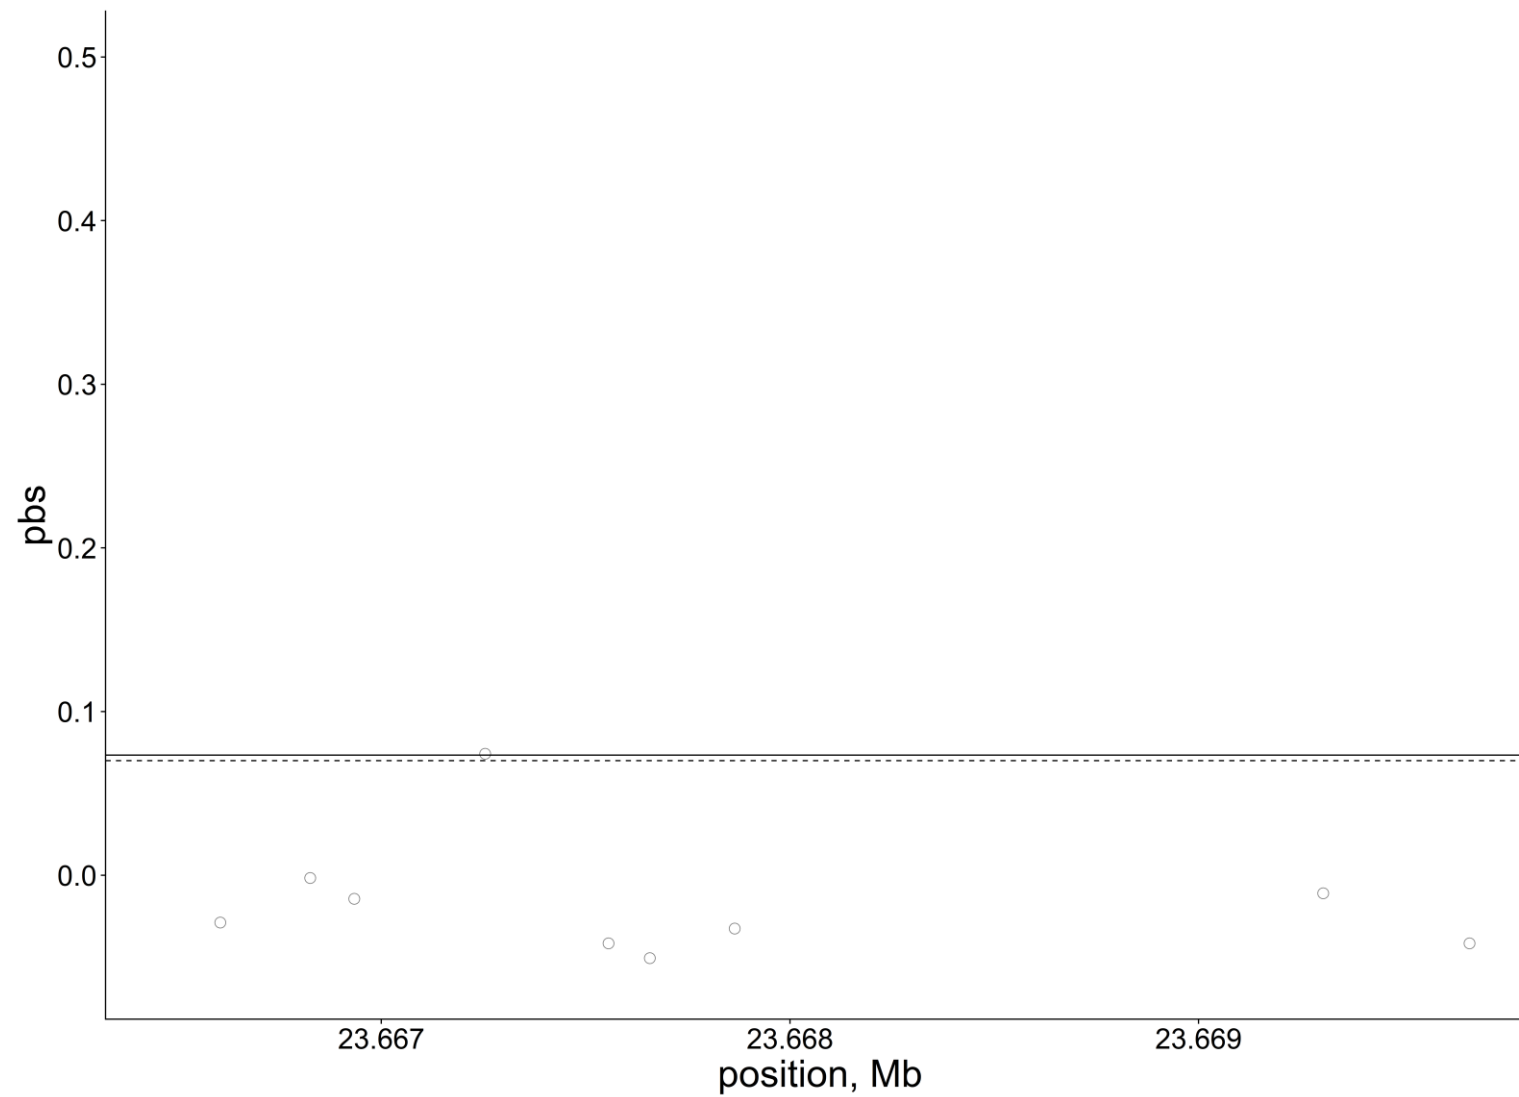



**CST5**

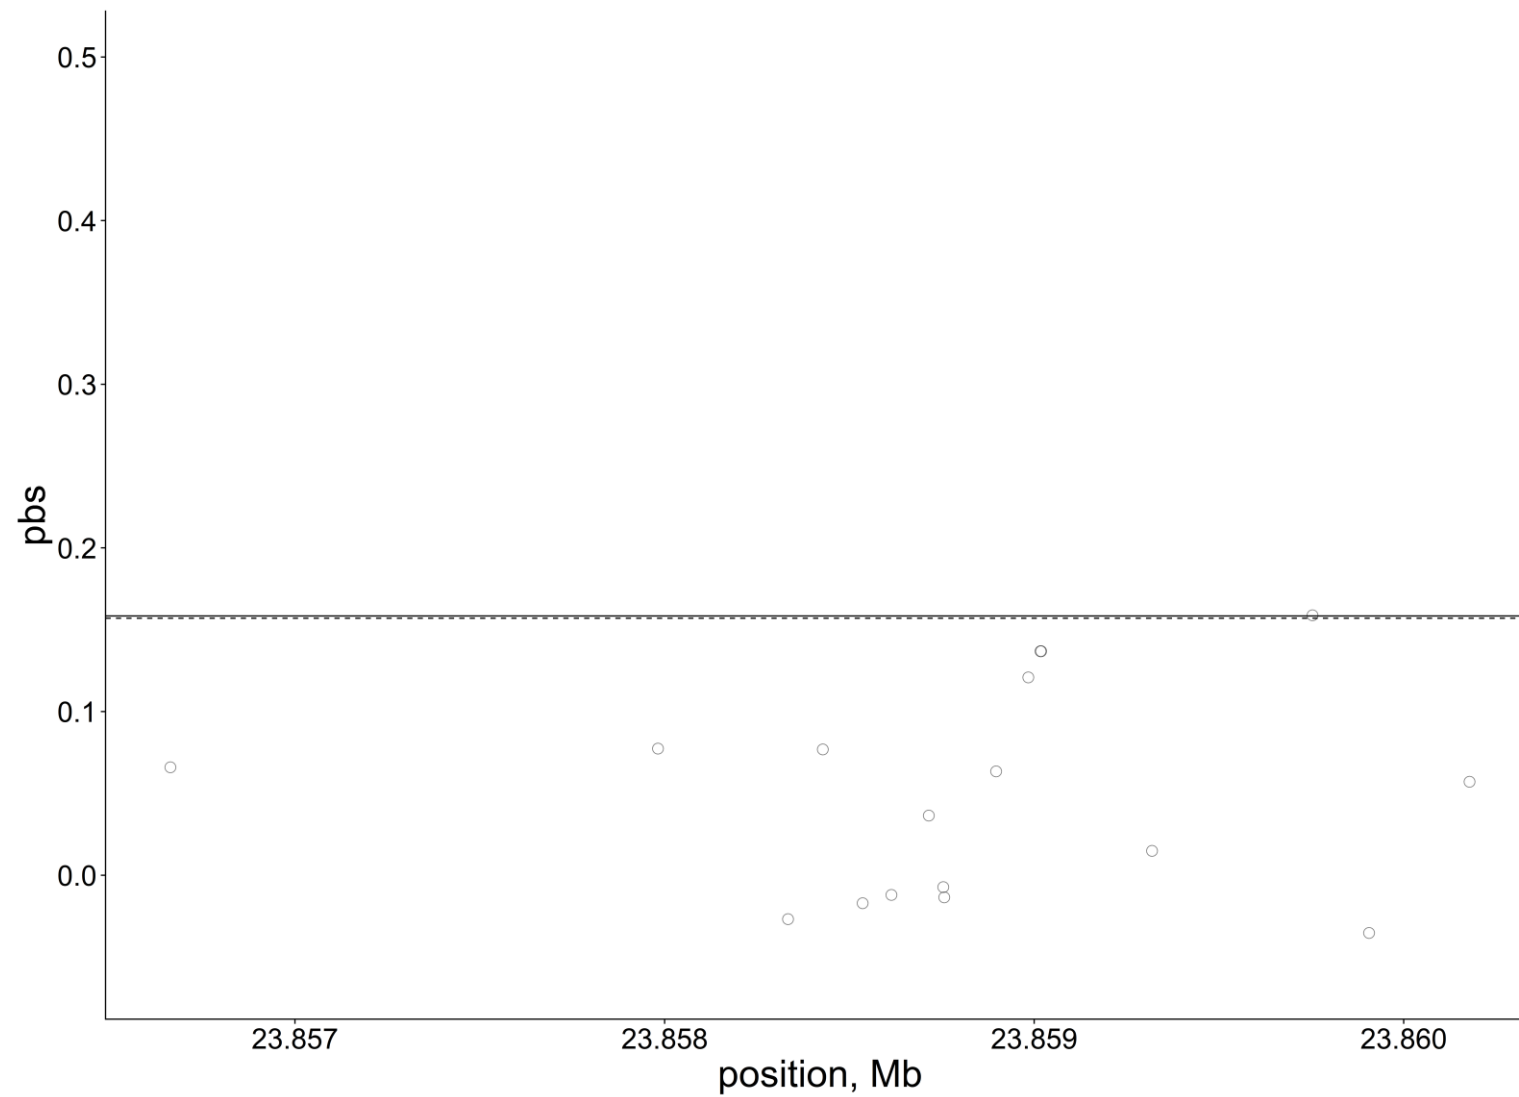

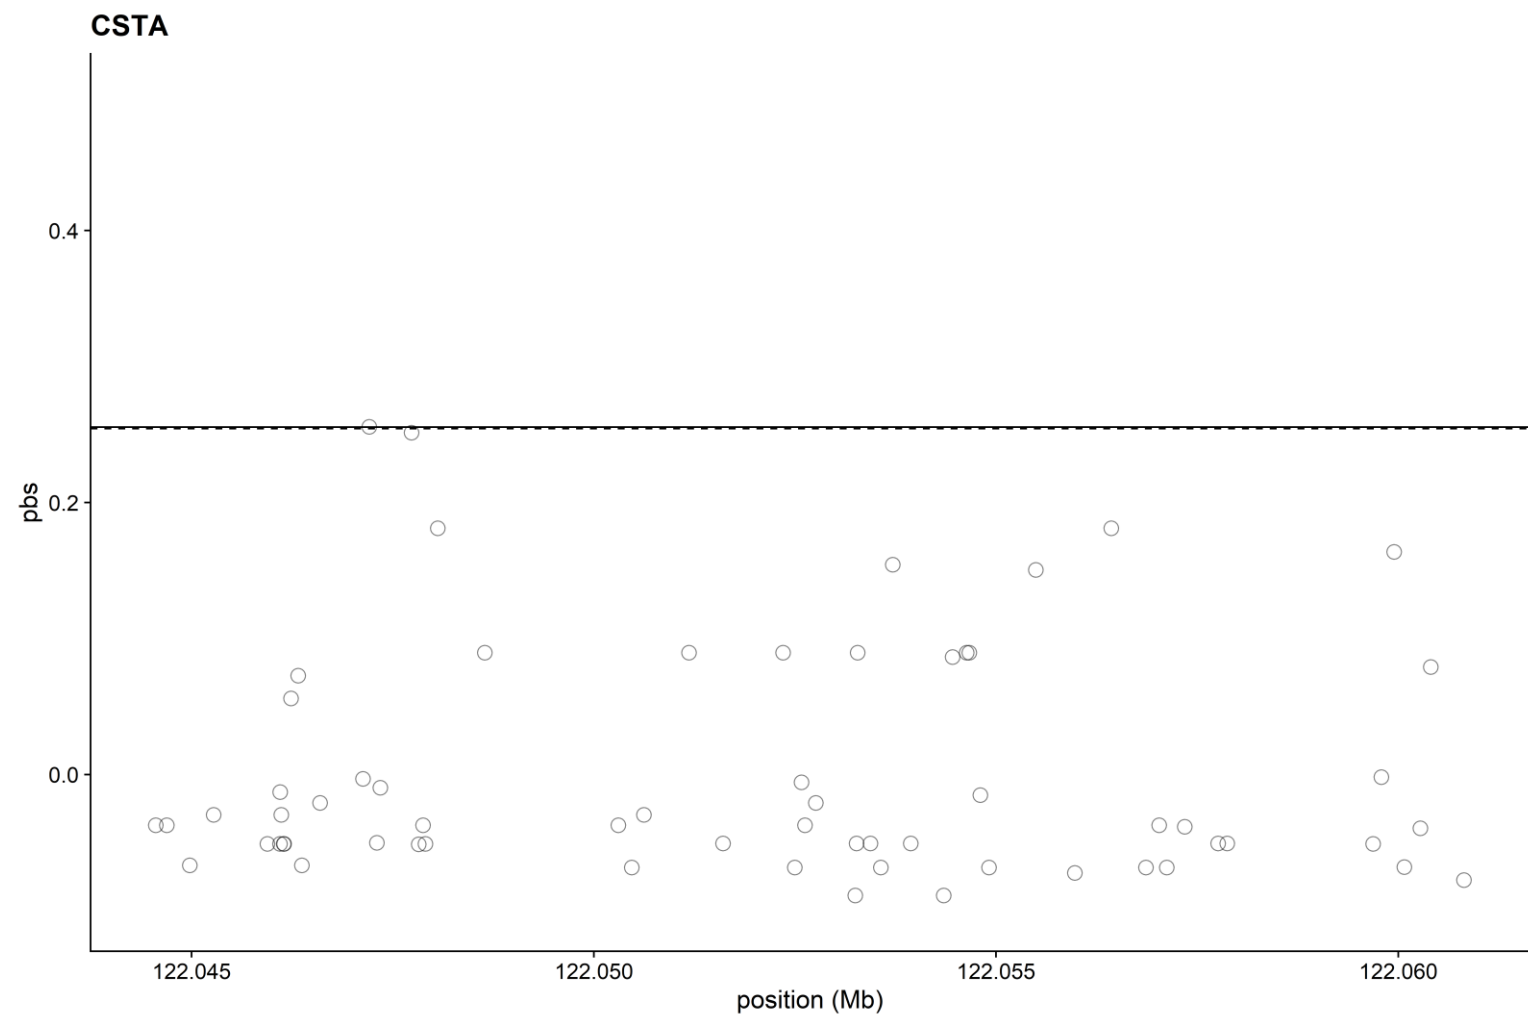

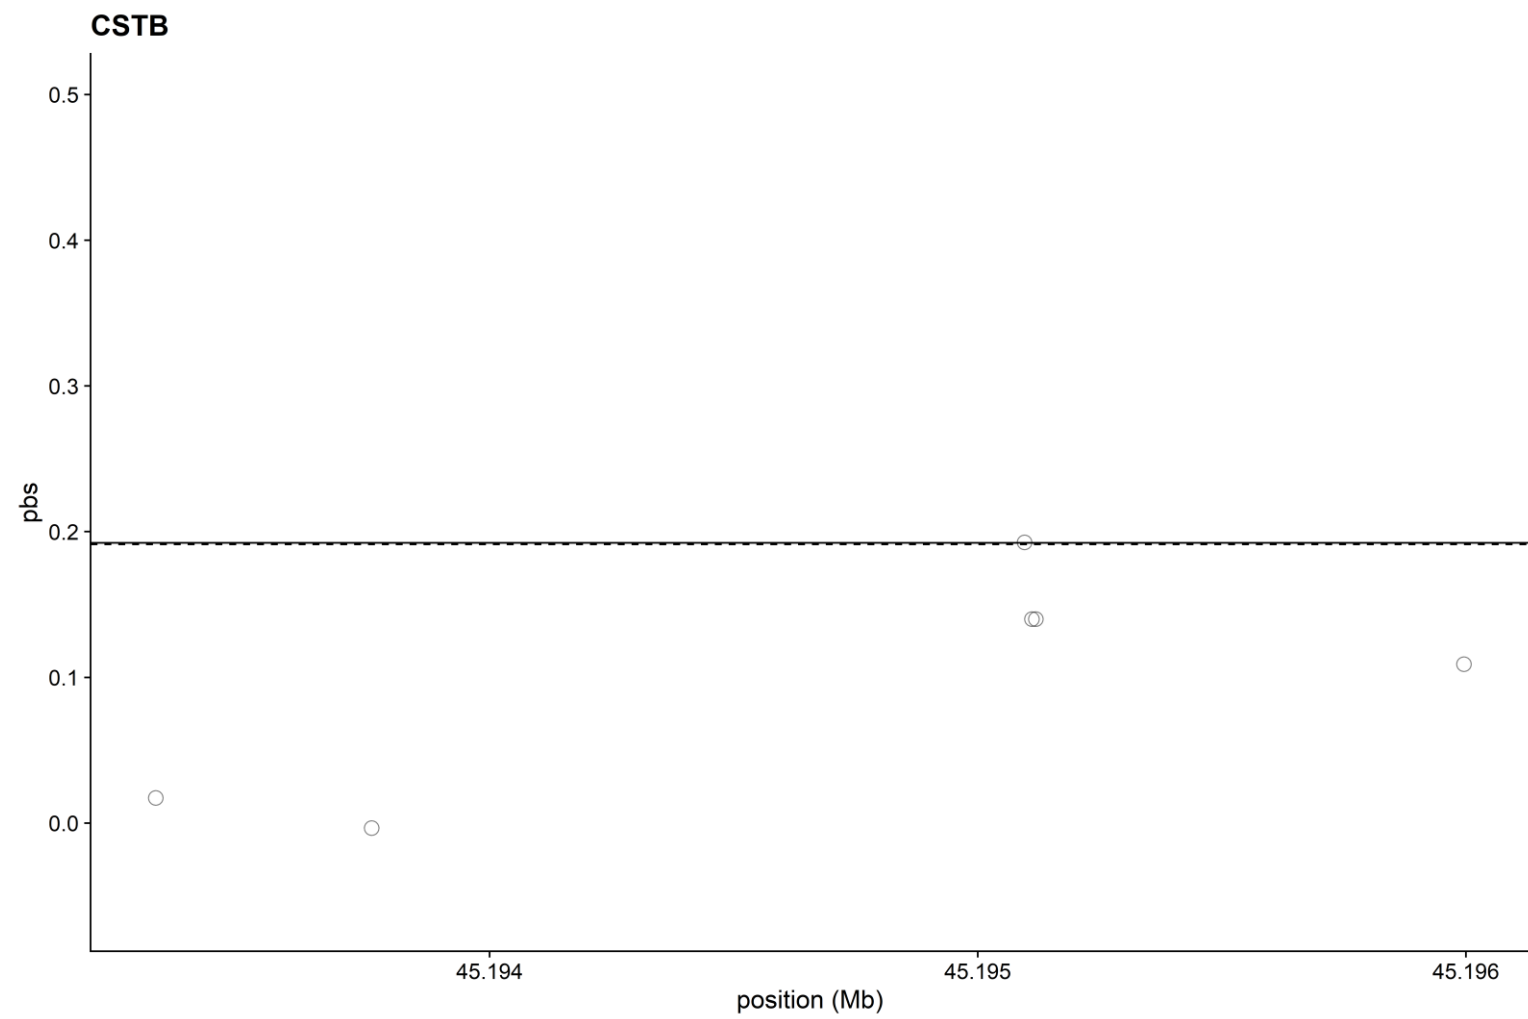

Supplement: s1 [file s1]
