# Supplementary material for: A Catalog of Coding Sequence Variations in Salivary Proteins’ Genes Occurring during Recent Human Evolution
Source: MDPI journal article supplement (doi:10.3390/ijms241915010), 2023-10-09
Supplement: s1 [file s1]

Table S14. Nucleotide Substitutions in *CST4* gene in introns and regulatory regions

| Genomic Coordinates (hg19) | Gene Region      | Modern human | Altai Neanderthal (Variant Frequency) | Chagyrskaya                     | Vindija                         | Denisovan (Variant Frequency) | Codon → amino acid |
|----------------------------|------------------|--------------|---------------------------------------|---------------------------------|---------------------------------|-------------------------------|--------------------|
|                            |                  |              |                                       | Neanderthal (Variant Frequency) | Neanderthal (Variant Frequency) |                               |                    |
| 23,670,147                 | Upstream regions | C            | C (100%)                              | T (3%)*                         | T (13%)                         | C (100%)                      |                    |
| 23,670,111                 | Upstream regions | G            | A (3%)*                               | A (3%)*                         | A (11%)                         | G (100%)                      |                    |
| 23,670,022                 | Upstream regions | G            | G (100%)                              | A (10%)*                        | A (12%)                         | G (100%)                      |                    |
| 23,669,985                 | Upstream regions | C            | C (100%)                              | T (23%)                         | T (7%)*                         | C (100%)                      |                    |
| 23,669,978                 | Upstream regions | C            | C (100%)                              | C (100%)                        | T (11%)                         | C (100%)                      |                    |
| 23,669,971                 | Upstream regions | C            | C (100%)                              | T (21%)                         | T (4%)*                         | C (100%)                      |                    |
| 23,669,967                 | Upstream regions | G            | G (100%)                              | A (7%)*                         | A (13%)                         | G (100%)                      |                    |
| 23,669,962                 | Upstream regions | C            | C (100%)                              | T (11%)                         | T (12%)                         | C (100%)                      |                    |
| 23,669,960                 | Upstream regions | C            | C (100%)                              | T (11%)                         | C (100%)                        | T (2%)*                       |                    |
| 23,669,905                 | Upstream regions | C            | C (100%)                              | T (10%)*                        | T (11%)                         | C (100%)                      |                    |
| 23,669,881                 | Upstream regions | C            | C (100%)                              | T (6%)*                         | T (11%)                         | C (100%)                      |                    |
| 23,669,874                 | Upstream regions | C            | C (100%)                              | T (7%)*                         | T (14%)                         | C (100%)                      |                    |
| 23,669,872                 | Upstream regions | C            | C (100%)                              | T (8%)*                         | T (13%)                         | C (100%)                      |                    |
| 23,669,871                 | Upstream regions | C            | C (100%)                              | T (8%)*                         | T (11%)                         | C (100%)                      |                    |
| 23,669,870                 | Upstream regions | C            | C (100%)                              | T (8%)*                         | T (13%)                         | C (100%)                      |                    |
| 23,669,859                 | Upstream regions | C            | C (100%)                              | C (100%)                        | T (14%)                         | C (100%)                      |                    |
| 23,669,856                 | Upstream regions | C            | C (100%)                              | T (14%)                         | C (100%)                        | C (100%)                      |                    |
| 23,669,855                 | Upstream regions | C            | C (100%)                              | T (14%)                         | T (7%)*                         | C (100%)                      |                    |
| 23,669,851                 | Upstream regions | C            | C (100%)                              | C (100%)                        | T (13%)                         | C (100%)                      |                    |
| 23,669,850                 | Upstream regions | C            | C (100%)                              | T (7%)*                         | T (12%)                         | C (100%)                      |                    |
| 23,669,847                 | Upstream regions | C            | C (100%)                              | T (7%)*                         | T (12%)                         | C (100%)                      |                    |
| 23,669,839                 | Upstream regions | C            | C (100%)                              | T (13%)                         | T (5%)*                         | C (100%)                      |                    |
| 23,669,838                 | Upstream regions | C            | C (100%)                              | T (18%)                         | T (5%)*                         | C (100%)                      |                    |
| 23,669,829                 | Upstream regions | C            | T (3%)*                               | C (100%)                        | T (18%)                         | C (100%)                      |                    |
| 23,669,824                 | Upstream regions | C            | T (17%)                               | T (5%)*                         | T (27%)                         | T (12%)                       |                    |
| 23,669,822                 | Upstream regions | C            | T (15%)                               | T (15%)                         | T (20%)                         | T (12%)                       |                    |
| 23,669,808                 | Upstream regions | C            | C (100%)                              | C (100%)                        | T (18%)                         | C (100%)                      |                    |
| 23,669,775                 | Upstream regions | C            | C (100%)                              | C (100%)                        | T (11%)                         | C (100%)                      |                    |

|            |                  |     |            |            |            |            |                                                  |
|------------|------------------|-----|------------|------------|------------|------------|--------------------------------------------------|
| 23,669,762 | Upstream regions | C   | C (100%)   | T (3%)*    | T (11%)    | C (100%)   |                                                  |
| 23,669,760 | Upstream regions | C   | C (100%)   | T (3%)*    | T (14%)    | C (100%)   |                                                  |
| 23,669,756 | Upstream regions | C   | T (5%)*    | T (19%)    | T (9%)*    | T (29%)    |                                                  |
| 23,669,745 | Upstream regions | C   | C (100%)   | C (100%)   | T (18%)    | C (100%)   |                                                  |
| 23,669,741 | Upstream regions | C   | C (100%)   | T (8%)*    | T (15%)    | C (100%)   |                                                  |
| 23,669,740 | Upstream regions | C   | C (96%)    | T (26%)    | T (20%)    | C (100%)   |                                                  |
| 23,669,739 | Upstream regions | C   | C (96%)    | T (17%)    | T (10%)*   | C (100%)   |                                                  |
| 23,669,731 | Upstream regions | C   | C (100%)   | T (14%)    | T (10%)*   | C (100%)   |                                                  |
| 23,669,723 | Upstream regions | C   | C (96%)    | T (17%)    | T (9%)*    | C (100%)   |                                                  |
| 23,669,692 | Upstream regions | G   | C (31%)    | C (27%)    | C (44%)**  | C (24%)    |                                                  |
| 23,669,682 | Upstream regions | C   | C (100%)   | C (100%)   | T (15%)    | C (100%)   |                                                  |
| 23,669,674 | Upstream regions | G   | A (3%)*    | G (100%)   | A (13%)    | G (100%)   |                                                  |
| 23,669,672 | Upstream regions | G   | A (3%)*    | A (27%)    | G (100%)   | G (100%)   |                                                  |
| 23,669,663 | Upstream regions | C   | T (41%)    | T (8%)*    | T (43%)    | T (29%)    |                                                  |
| 23,669,650 | 5' UTR           | G   | G (100%)   | A (12%)    | G (100%)   | G (100%)   |                                                  |
| 23,669,630 | 5' UTR           | A   | G (74%)    | G (89%)    | G (52%)    | G (79%)    |                                                  |
| 23,669,620 | 5' UTR           | G   | G (100%)   | A (13%)    | G (100%)   | G (100%)   |                                                  |
| 23,669,617 | 5' UTR           | G   | G (100%)   | A (11%)    | A (5%)*    | G (100%)   |                                                  |
| 23,669,598 | Exon 1 (Signal)  | GCC | GCC (100%) | GCC (100%) | GCT (5%)*  | GCT (100%) | CGG→R <sub>2(sp)</sub><br>CGA→R <sub>2(sp)</sub> |
| 23,669,577 | Exon 1 (Signal)  | GAG | GAG (100%) | GAA (8%)*  | GAA (11%)  | GAG (100%) | CUC→L <sub>9(sp)</sub><br>CUU→L <sub>9(sp)</sub> |
| 23,669,544 | Exon 1           | AGC | AGT (5%)*  | AGC (100%) | AGT (13%)  | AGT (4%)*  | UCG→S <sub>1</sub><br>UCA→S <sub>1</sub>         |
| 23,669,538 | Exon 1           | AGG | AGG (100%) | AGG (100%) | AGA (13%)  | AGG (100%) | UCC→S <sub>3</sub><br>UCU→S <sub>3</sub>         |
| 23,669,523 | Exon 1           | TCC | TCI (2%)*  | TCC (100%) | TCI (20%)  | TCC (100%) | AGG→R <sub>8</sub><br>AGA→R <sub>8</sub>         |
| 23,669,493 | Exon 1           | CTG | CTG (100%) | CTA (5%)*  | CTA (20%)  | CTG (100%) | GAC→D <sub>18</sub><br>GAU→D <sub>18</sub>       |
| 23,669,405 | Exon 1           | GAC | GAC (100%) | AAC (12%)  | GAC (100%) | GAC (100%) | CUG→L <sub>48</sub><br>UUG→L <sub>48</sub>       |
| 23,669,378 | Intron 1         | C   | C (100%)   | T (16%)    | T (6%)*    | C (100%)   |                                                  |
| 23,669,368 | Intron 1         | G   | G (100%)   | A (11%)    | G (100%)   | G (100%)   |                                                  |
| 23,669,367 | Intron 1         | G   | G (100%)   | A (12%)    | G (100%)   | G (100%)   |                                                  |
| 23,669,359 | Intron 1         | C   | C (100%)   | T (5%)*    | T (13%)    | T (6%)*    |                                                  |
| 23,669,356 | Intron 1         | C   | C (100%)   | C (100%)   | T (13%)    | C (100%)   |                                                  |
| 23,669,354 | Intron 1         | C   | C (100%)   | T (6%)*    | T (18%)    | C (100%)   |                                                  |
| 23,669,345 | Intron 1         | G   | G (100%)   | A (11%)    | G (100%)   | G (100%)   |                                                  |
| 23,669,278 | Intron 1         | G   | G (100%)   | A (5%)*    | A (15%)    | G (100%)   |                                                  |

|            |          |   |          |            |            |          |
|------------|----------|---|----------|------------|------------|----------|
| 23,669,208 | Intron 1 | A | C (100%) | C (100%)   | C (100%)   | A (100%) |
| 23,669,024 | Intron 1 | G | G (100%) | G (100%)   | A (11%)    | G (100%) |
| 23,668,993 | Intron 1 | G | G (100%) | G (100%)   | A (14%)    | G (100%) |
| 23,668,992 | Intron 1 | G | G (97%)  | G (100%)   | A (14%)    | G (100%) |
| 23,668,988 | Intron 1 | G | G (100%) | A (19%)    | G (100%)   | G (100%) |
| 23,668,971 | Intron 1 | G | G (100%) | A (6%)*    | A (19%)    | G (100%) |
| 23,668,966 | Intron 1 | G | G (100%) | G (100%)   | A (11%)    | G (100%) |
| 23,668,957 | Intron 1 | G | G (97%)  | A (17%)    | A (6%)*    | G (100%) |
| 23,668,956 | Intron 1 | G | G (100%) | A (6%)*    | A (11%)    | G (100%) |
| 23,668,937 | Intron 1 | G | G (100%) | G (100%)   | A (14%)    | G (100%) |
| 23,668,933 | Intron 1 | G | G (100%) | A (18%)    | A (7%)*    | G (100%) |
| 23,668,932 | Intron 1 | G | G (100%) | A (18%)    | A (7%)*    | G (100%) |
| 23,668,931 | Intron 1 | G | G (100%) | A (18%)    | G (100%)   | G (100%) |
| 23,668,911 | Intron 1 | G | G (100%) | A (15%)    | A (17%)**  | G (100%) |
| 23,668,891 | Intron 1 | G | G (100%) | A (11%)    | G (100%)** | G (100%) |
| 23,668,890 | Intron 1 | G | G (100%) | A (16%)    | G (100%)** | G (100%) |
| 23,668,848 | Intron 1 | G | G (100%) | A (11%)**  | G (100%)   | A (13%)  |
| 23,668,829 | Intron 1 | C | T (97%)  | T (100%)** | T (100%)   | C (100%) |
| 23,668,801 | Intron 1 | C | C (100%) | C (100%)   | T (13%)    | C (100%) |
| 23,668,798 | Intron 1 | C | C (100%) | C (100%)   | T (13%)    | C (100%) |
| 23,668,796 | Intron 1 | C | C (100%) | C (100%)   | T (15%)    | C (100%) |
| 23,668,765 | Intron 1 | C | C (100%) | C (100%)   | T (14%)    | C (100%) |
| 23,668,750 | Intron 1 | C | T (4%)*  | C (100%)   | T (13%)    | C (100%) |
| 23,668,709 | Intron 1 | G | G (100%) | G (100%)   | A (11%)    | G (100%) |
| 23,668,681 | Intron 1 | G | G (100%) | A (10%)*   | G (100%)   | A (96%)  |
| 23,668,664 | Intron 1 | G | G (100%) | A (14%)    | A (5%)*    | G (100%) |
| 23,668,663 | Intron 1 | G | G (98%)  | G (100%)   | A (14%)    | G (100%) |
| 23,668,639 | Intron 1 | C | C (100%) | T (12%)    | T (9%)*    | C (100%) |
| 23,668,636 | Intron 1 | G | G (100%) | G (100%)   | A (14%)    | G (100%) |
| 23,668,596 | Intron 1 | G | G (98%)  | G (100%)   | A (13%)    | G (100%) |
| 23,668,581 | Intron 1 | C | C (100%) | C (100%)   | T (12%)    | C (100%) |
| 23,668,573 | Intron 1 | G | G (100%) | G (100%)   | A (11%)    | G (100%) |
| 23,668,572 | Intron 1 | G | G (100%) | A (14%)    | A (6%)*    | G (100%) |
| 23,668,554 | Intron 1 | G | G (100%) | A (12%)    | A (11%)    | G (100%) |
| 23,668,546 | Intron 1 | G | G (100%) | G (100%)   | G (100%)   | T (100%) |

|            |          |                     |                            |                            |                           |                            |                                            |
|------------|----------|---------------------|----------------------------|----------------------------|---------------------------|----------------------------|--------------------------------------------|
| 23,668,494 | Intron 1 | C                   | C (100%)                   | G (96%)                    | G (100%)                  | G (100%)                   |                                            |
| 23,668,492 | Intron 1 | G                   | G (100%)                   | A (16%)                    | A (8%)*                   | G (100%)                   |                                            |
| 23,668,475 | Intron 1 | G                   | G (100%)                   | G (100%)                   | A (12%)                   | G (100%)                   |                                            |
| 23,668,364 | Intron 1 | C                   | C (100%)                   | T (8%)*                    | T (13%)                   | C (100%)                   |                                            |
| 23,668,361 | Intron 1 | C                   | C (100%)                   | T (12%)                    | C (100%)                  | C (100%)                   |                                            |
| 23,668,345 | Intron 1 | C                   | C (98%)                    | C (100%)                   | T (12%)                   | C (100%)                   |                                            |
| 23,668,343 | Intron 1 | C                   | C (100%)                   | C (100%)                   | T (17%)                   | C (100%)                   |                                            |
| 23,668,214 | Intron 1 | C                   | C (100%)                   | T (3%)*                    | T (11%)                   | C (100%)                   |                                            |
| 23,668,111 | Intron 1 | C                   | C (100%)                   | T (11%)                    | T (4%)*                   | C (100%)                   |                                            |
| 23,668,091 | Intron 1 | G                   | G (100%)                   | A (3%)*                    | A (11%)                   | G (100%)                   |                                            |
| 23,668,033 | Intron 1 | G                   | A (98%)                    | A (100%)                   | A (98%)                   | G (100%)                   |                                            |
| 23,668,002 | Intron 1 | G                   | G (100%)                   | A (6%)*                    | A (17%)                   | G (100%)                   |                                            |
| 23,667,973 | Intron 1 | C                   | G (14%)                    | C (90%)                    | C (95%)                   | C (100%)                   |                                            |
| 23,667,957 | Intron 1 | G                   | G (100%)                   | G (100%)                   | A (21%)                   | G (100%)                   |                                            |
| 23,667,917 | Intron 1 | G                   | G (100%)                   | A (4%)*                    | A (3%)*                   | A (23%)                    |                                            |
| 23,667,866 | Intron 1 | G                   | A (2%)*                    | A (7%)*                    | A (18%)                   | G (100%)                   |                                            |
| 23,667,862 | Intron 1 | G                   | G (100%)                   | G (100%)                   | A (13%)                   | G (100%)                   |                                            |
| 23,667,797 | Exon 2   | CC <u>G</u>         | CC <u>G</u> (100%)         | CC <u>G</u> (100%)         | CC <u>A</u> (13%)         | CC <u>G</u> (100%)         | GGC→G <sub>70</sub><br>GGU→G <sub>70</sub> |
| 23,667,794 | Exon 2   | G <u>C</u> <u>G</u> | G <u>C</u> <u>T</u> (20%)  | G <u>C</u> <u>T</u> (12%)  | G <u>C</u> <u>T</u> (23%) | G <u>C</u> <u>T</u> (12%)  | CGC→R <sub>71</sub><br>CGA→R <sub>71</sub> |
| 23,667,782 | Exon 2   | T <u>G</u> <u>G</u> | T <u>G</u> <u>A</u> (3%)   | T <u>G</u> <u>G</u> (100%) | T <u>G</u> <u>A</u> (15%) | T <u>G</u> <u>G</u> (100%) | ACC→T <sub>75</sub><br>ACU→T <sub>75</sub> |
| 23,667,767 | Exon 2   | T <u>T</u> <u>G</u> | T <u>T</u> <u>G</u> (100%) | T <u>T</u> <u>G</u> (100%) | T <u>T</u> <u>A</u> (12%) | T <u>T</u> <u>G</u> (100%) | AAC→N <sub>80</sub><br>AAU→N <sub>80</sub> |
| 23,667,720 | Intron 2 | C                   | T (3%)*                    | C (100%)                   | T (15%)                   | C (100%)                   |                                            |
| 23,667,675 | Intron 2 | G                   | G (100%)                   | G (100%)                   | A (13%)                   | G (100%)                   |                                            |
| 23,667,674 | Intron 2 | C                   | C (100%)                   | T (6%)*                    | T (13%)                   | C (100%)                   |                                            |
| 23,667,657 | Intron 2 | A                   | G (100%)                   | G (100%)                   | G (94%)                   | G (100%)                   |                                            |
| 23,667,612 | Intron 2 | C                   | C (100%)                   | T (18%)                    | T (22%)**                 | C (100%)                   |                                            |
| 23,667,606 | Intron 2 | C                   | C (100%)                   | T (15%)                    | T (14%)**                 | C (100%)                   |                                            |
| 23,667,572 | Intron 2 | T                   | C (11%)                    | C (11%)                    | C (25%)**                 | C (9%)*                    |                                            |
| 23,667,568 | Intron 2 | C                   | T (11%)                    | T (18%)                    | T (33%)**                 | T (9%)*                    |                                            |
| 23,667,558 | Intron 2 | T                   | G (10%)*                   | G (16%)                    | G (30%)*                  | G (12%)                    |                                            |
| 23,667,521 | Intron 2 | G                   | A (100%)                   | A (95%)                    | A (100%)                  | G (96%)                    |                                            |
| 23,667,514 | Intron 2 | C                   | C (100%)                   | C (100%)                   | T (11%)                   | C (100%)                   |                                            |
| 23,667,496 | Intron 2 | C                   | C (97%)                    | C (100%)                   | T (12%)                   | C (100%)                   |                                            |
| 23,667,472 | Intron 2 | C                   | C (100%)                   | T (13%)                    | T (7%)*                   | C (100%)                   |                                            |

|            |          |   |          |                    |                        |          |
|------------|----------|---|----------|--------------------|------------------------|----------|
| 23,667,466 | Intron 2 | C | C (100%) | T (17%)            | T (6%)*                | C (100%) |
| 23,667,425 | Intron 2 | C | C (100%) | T (5%)*            | T (13%)                | C (100%) |
| 23,667,392 | Intron 2 | G | G (100%) | G (100%)           | A (12%)                | G (100%) |
| 23,667,376 | Intron 2 | C | C (100%) | C (100%)           | T (12%)                | C (100%) |
| 23,667,375 | Intron 2 | C | C (100%) | C (100%)           | T (13%)                | C (100%) |
| 23,667,374 | Intron 2 | C | C (100%) | T (6%)*            | T (13%)                | C (100%) |
| 23,667,373 | Intron 2 | C | C (100%) | T (6%)*            | T (14%)                | C (100%) |
| 23,667,368 | Intron 2 | C | C (100%) | C (100%)           | T (13%)                | C (100%) |
| 23,667,361 | Intron 2 | C | C (100%) | T (7%)*            | T (13%)                | C (100%) |
| 23,667,360 | Intron 2 | C | T (3%)*  | T (7%)*            | T (13%)                | C (100%) |
| 23,667,359 | Intron 2 | C | C (100%) | C (100%)           | T (20%)                | C (100%) |
| 23,667,358 | Intron 2 | C | C (100%) | T (21%)            | T (25%)                | C (100%) |
| 23,667,353 | Intron 2 | C | C (100%) | C (100%)           | T (11%)                | C (100%) |
| 23,667,351 | Intron 2 | C | C (100%) | C (100%)           | T (18%)                | C (100%) |
| 23,667,322 | Intron 2 | C | C (100%) | T (17%)            | T (3%)*                | C (100%) |
| 23,667,312 | Intron 2 | G | G (100%) | G (100%)           | A (12%)                | G (100%) |
| 23,667,306 | Intron 2 | C | C (100%) | T (21%)            | T (8%)*                | C (100%) |
| 23,667,287 | Intron 2 | C | T (11%)  | T (22%)            | T (23%)                | T (20%)  |
| 23,667,260 | Intron 2 | T | T (100%) | G (21%)            | G (26%)                | T (100%) |
| 23,667,255 | Intron 2 | G | C (26%)  | C (26%)            | C (42%)                | G (98%)  |
| 23,667,236 | Intron 2 | C | C (100%) | T (13%)            | T (4%)*                | C (100%) |
| 23,667,225 | Intron 2 | T | G (16%)  | G (26%)            | G (13%)                | G (16%)  |
| 23,667,209 | Intron 2 | G | C (9%)*  | C (23%)            | C (8%)*                | C (6%)*  |
| 23,667,134 | Intron 2 | C | C (100%) | T (18%)            | C (100%)               | C (100%) |
| 23,667,127 | Intron 2 | G | G (100%) | G (100%)           | A (14%)                | G (100%) |
| 23,667,098 | Intron 2 | T | C (100%) | C (100%)           | T (100%)**             | C (23%)  |
| 23,667,054 | Intron 2 | G | A (3%)*  | A (11%)            | G (100%)**             | G (100%) |
| 23,667,052 | Intron 2 | G | G (100%) | A (11%)            | G (100%)**             | G (100%) |
| 23,667,042 | Intron 2 | G | G (100%) | A (21%)            | G (100%)**             | G (100%) |
| 23,667,036 | Intron 2 | T | G (100%) | G (75%)<br>G (25%) | G (75%)**<br>G (25%)** | G (13%)  |
| 23,667,012 | Intron 2 | C | C (100%) | C (100%)           | T (11%)                | C (100%) |
| 23,667,011 | Intron 2 | C | C (97%)  | T (7%)*            | T (11%)                | C (100%) |
| 23,666,999 | Intron 2 | G | G (100%) | A (24%)            | G (100%)               | G (100%) |
| 23,666,986 | Intron 2 | G | G (100%) | A (13%)            | G (100%)               | G (100%) |

|            |          |   |          |            |            |            |
|------------|----------|---|----------|------------|------------|------------|
| 23,666,971 | Intron 2 | C | T (2%)*  | T (11%)    | T (5%)*    | C (100%)   |
| 23,666,960 | Intron 2 | C | T (14%)  | C (100%)   | T (18%)    | C (100%)   |
| 23,666,924 | Intron 2 | T | C (3%)*  | T (100%)   | T (100%)   | C (38%)    |
| 23,666,923 | Intron 2 | G | G (100%) | A (13%)    | G (100%)   | G (100%)   |
| 23,666,920 | Intron 2 | G | G (100%) | A (18%)    | G (100%)   | G (100%)   |
| 23,666,905 | Intron 2 | G | G (100%) | A (13%)    | G (100%)   | G (100%)   |
| 23,666,888 | Intron 2 | G | G (100%) | A (6%)*    | A (20%)    | G (100%)   |
| 23,666,882 | Intron 2 | G | G (97%)  | A (13%)    | G (100%)   | G (100%)   |
| 23,666,857 | Intron 2 | T | G (100%) | G (100%)** | G (91%)    | T (100%)   |
| 23,666,851 | Intron 2 | G | G (100%) | G (100%)** | A (17%)    | G (100%)   |
| 23,666,812 | Intron 2 | C | C (100%) | C (100%)   | T (7%)*    | T (100%)   |
| 23,666,804 | Intron 2 | C | C (98%)  | T (6%)*    | T (20%)    | C (100%)   |
| 23,666,778 | Intron 2 | C | C (100%) | C (100%)   | T (13%)    | C (100%)   |
| 23,666,762 | Intron 2 | C | C (100%) | C (100%)   | T (12%)    | C (100%)   |
| 23,666,752 | Intron 2 | G | G (100%) | A (13%)    | G (100%)   | G (100%)   |
| 23,666,728 | Intron 2 | C | C (100%) | T (12%)    | C (100%)   | C (100%)   |
| 23,666,726 | Intron 2 | C | C (100%) | T (12%)    | C (100%)   | C (100%)   |
| 23,666,719 | Intron 2 | C | T (100%) | T (100%)   | T (100%)   | C (100%)   |
| 23,666,690 | Intron 2 | C | G (94%)  | G (100%)   | G (100%)** | G (100%)** |
| 23,666,665 | Intron 2 | G | G (100%) | A (15%)    | G (100%)   | G (100%)   |
| 23,666,650 | Intron 2 | G | G (100%) | A (13%)    | G (100%)   | A (6%)*    |
| 23,666,644 | Intron 2 | G | G (100%) | G (100%)   | A (11%)    | G (100%)   |
| 23,666,642 | Intron 2 | C | C (98%)  | C (100%)   | T (13%)    | C (100%)   |
| 23,666,528 | 3'UTR    | C | C (100%) | T (11%)    | C (100%)   | C (100%)   |
| 23,666,526 | 3'UTR    | G | G (100%) | A (11%)    | G (100%)   | G (100%)   |
| 23,666,524 | 3'UTR    | C | C (98%)  | C (100%)   | T (17%)    | C (100%)   |
| 23,666,496 | 3'UTR    | G | G (100%) | A (14%)    | A (25%)**  | G (100%)   |
| 23,666,484 | 3'UTR    | T | G (96%)  | G (100%)   | G (67%)**  | T (100%)   |
| 23,666,442 | 3'UTR    | C | C (100%) | T (17%)    | T (8%)*    | C (100%)   |
| 23,666,437 | 3'UTR    | C | A (85%)  | A (100%)   | A (100%)   | C (100%)   |
| 23,666,435 | 3'UTR    | G | G (100%) | G (100%)   | A (14%)    | G (100%)   |
| 23,666,433 | 3'UTR    | G | G (100%) | G (100%)   | A (14%)    | G (100%)   |
| 23,666,431 | 3'UTR    | G | G (100%) | G (100%)   | A (13%)    | G (100%)   |
| 23,666,423 | 3'UTR    | G | A (3%)*  | G (100%)   | A (11%)    | G (100%)   |
| 23,666,395 | 3'UTR    | C | C (100%) | T (11%)    | C (100%)   | C (100%)   |

|            |                    |   |          |          |            |          |
|------------|--------------------|---|----------|----------|------------|----------|
| 23,666,368 | 3'UTR              | G | A (2%)*  | G (95%)  | A (26%)    | G (100%) |
| 23,666,364 | 3'UTR              | G | G (100%) | A (14%)  | A (15%)    | G (100%) |
| 23,666,361 | 3'UTR              | G | G (100%) | A (5%)*  | A (11%)    | G (100%) |
| 23,666,359 | 3'UTR              | G | G (98%)  | G (100%) | A (11%)    | G (100%) |
| 23,666,331 | 3'UTR              | T | G (22%)  | G (12%)  | G (6%)*    | G (27%)  |
| 23,666,330 | 3'UTR              | G | G (100%) | G (100%) | A (18%)    | G (100%) |
| 23,666,329 | 3'UTR              | G | G (100%) | G (100%) | A (17%)    | G (100%) |
| 23,666,319 | 3'UTR              | C | C (100%) | C (100%) | T (14%)    | C (100%) |
| 23,666,271 | Downstream regions | G | G (100%) | A (5%)*  | A (13%)    | G (100%) |
| 23,666,257 | Downstream regions | C | C (100%) | T (13%)  | T (7%)*    | C (100%) |
| 23,666,241 | Downstream regions | T | C (9%)*  | T (100%) | C (4%)*    | C (11%)  |
| 23,666,196 | Downstream regions | C | G (89%)  | G (80%)  | G (86%)**  | G (100%) |
| 23,666,181 | Downstream regions | G | C (97%)  | C (90%)  | C (100%)** | G (92%)  |
| 23,666,158 | Downstream regions | C | T (100%) | T (100%) | T (100%)   | C (100%) |
| 23,666,145 | Downstream regions | G | G (100%) | A (12%)  | G (100%)   | G (100%) |
| 23,666,144 | Downstream regions | G | G (100%) | A (12%)  | G (100%)   | G (100%) |
| 23,666,113 | Downstream regions | G | G (97%)  | A (12%)  | G (100%)   | G (100%) |
| 23,666,111 | Downstream regions | G | G (100%) | G (100%) | A (14%)    | G (100%) |
| 23,666,051 | Downstream regions | C | C (100%) | T (13%)  | C (100%)   | C (100%) |
| 23,666,026 | Downstream regions | C | C (100%) | T (13%)  | C (100%)   | C (100%) |
| 23,666,014 | Downstream regions | C | C (100%) | T (13%)  | T (4%)*    | C (100%) |
| 23,666,013 | Downstream regions | C | C (100%) | T (16%)  | T (4%)*    | C (100%) |
| 23,665,990 | Downstream regions | C | C (100%) | C (100%) | T (11%)    | C (100%) |
| 23,665,955 | Downstream regions | C | T (100%) | T (100%) | T (100%)   | C (100%) |
| 23,665,951 | Downstream regions | C | C (100%) | C (100%) | T (11%)    | T (6%)*  |
| 23,665,950 | Downstream regions | C | C (100%) | T (12%)  | T (10%)*   | C (100%) |
| 23,665,949 | Downstream regions | C | C (100%) | T (12%)  | T (10%)*   | C (100%) |
| 23,665,942 | Downstream regions | C | C (100%) | C (100%) | T (11%)    | C (100%) |
| 23,665,940 | Downstream regions | C | C (100%) | T (7%)*  | T (11%)    | C (100%) |
| 23,665,933 | Downstream regions | C | C (100%) | C (100%) | T (15%)    | C (100%) |
| 23,665,929 | Downstream regions | C | C (100%) | T (7%)*  | T (11%)    | C (100%) |
| 23,665,928 | Downstream regions | C | C (100%) | T (8%)*  | T (11%)    | C (100%) |

|            |                    |   |          |          |          |          |
|------------|--------------------|---|----------|----------|----------|----------|
| 23,665,916 | Downstream regions | C | C (100%) | T (6%)*  | T (13%)  | C (100%) |
| 23,665,898 | Downstream regions | C | C (100%) | T (11%)  | C (100%) | C (100%) |
| 23,665,862 | Downstream regions | G | G (100%) | G (100%) | A (11%)  | G (100%) |
| 23,665,835 | Downstream regions | G | G (100%) | G (100%) | A (11%)  | G (100%) |
| 23,665,834 | Downstream regions | G | G (100%) | A (14%)  | G (100%) | G (100%) |
| 23,665,832 | Downstream regions | G | G (100%) | A (5%)*  | A (11%)  | G (100%) |
| 23,665,827 | Downstream regions | G | G (100%) | A (14%)  | G (100%) | G (100%) |
| 23,665,790 | Downstream regions | G | G (100%) | A (4%)*  | A (12%)  | G (100%) |
| 23,665,772 | Downstream regions | T | A (4%)*  | A (13%)  | T (100%) | A (5%)*  |
| 23,665,726 | Downstream regions | C | A (19%)  | A (12%)  | A (4%)*  | C (100%) |
| 23,665,720 | Downstream regions | C | T (5%)*  | T (6%)*  | T (12%)  | C (100%) |
| 23,665,718 | Downstream regions | C | A (73%)  | A (68%)  | A (59%)  | C (100%) |
| 23,665,714 | Downstream regions | C | C (100%) | T (23%)  | T (11%)  | C (100%) |
| 23,665,712 | Downstream regions | T | C (5%)*  | T (100%) | T (100%) | C (32%)  |
| 23,665,711 | Downstream regions | T | A (5%)*  | T (100%) | T (100%) | A (32%)  |
| 23,665,710 | Downstream regions | G | C (3%)*  | G (100%) | G (100%) | C (24%)  |
| 23,665,708 | Downstream regions | C | C (100%) | A (15%)  | A (4%)*  | C (100%) |
| 23,665,707 | Downstream regions | T | T (100%) | T (100%) | T (100%) | A (14%)  |
| 23,665,706 | Downstream regions | A | A (100%) | A (100%) | A (100%) | C (14%)  |

n.a.: not available; the variant frequency is referred to the percentage of the highlighted base in the sequenced ancient hominine genome, with\* frequency≤10% and \*\* counts<10. In light orange are underlined the variants fixed at 100% in modern human compared to ancient hominines.
