# Supplementary material for: A Catalog of Coding Sequence Variations in Salivary Proteins’ Genes Occurring during Recent Human Evolution
Source: MDPI journal article supplement (doi:10.3390/ijms241915010), 2023-10-09
Supplement: s1 [file s1]

Table S12. Nucleotide Substitutions in *CST2* gene in introns and regulatory regions

| Genomic Coordinates (hg19) | Gene Region     | Modern human | Altai Neanderthal (Variant Frequency) | Chagyrskaya Neanderthal (Variant Frequency) | Vindija Neanderthal (Variant Frequency) | Denisovan (Variant Frequency) | Codon → amino acid                                 |
|----------------------------|-----------------|--------------|---------------------------------------|---------------------------------------------|-----------------------------------------|-------------------------------|----------------------------------------------------|
| 23,807,611                 | Upstream region | C            | C (100%)                              | T (15%)                                     | T (3%)*                                 | C (100%)                      |                                                    |
| 23,807,587                 | Upstream region | C            | C (100%)                              | C (100%)                                    | T (11%)                                 | C (100%)                      |                                                    |
| 23,807,544                 | Upstream region | G            | G (100%)                              | G (100%)                                    | A (11%)                                 | G (100%)                      |                                                    |
| 23,807,531                 | Upstream region | C            | C (100%)                              | T (11%)                                     | T (6%)*                                 | C (100%)                      |                                                    |
| 23,807,528                 | Upstream region | C            | C (100%)                              | T (12%)                                     | C (100%)                                | C (100%)                      |                                                    |
| 23,807,515                 | Upstream region | C            | C (100%)                              | C (100%)                                    | T (14%)                                 | C (100%)                      |                                                    |
| 23,807,512                 | Upstream region | C            | T (2%)*                               | T (14%)                                     | T (5%)*                                 | C (100%)                      |                                                    |
| 23,807,491                 | Upstream region | C            | C (100%)                              | C (100%)                                    | T (14%)                                 | C (100%)                      |                                                    |
| 23,807,480                 | Upstream region | C            | C (100%)                              | T (4%)*                                     | T (14%)                                 | C (100%)                      |                                                    |
| 23,807,447                 | Upstream region | C            | C (100%)                              | C (100%)                                    | T (17%)                                 | C (100%)                      |                                                    |
| 23,807,423                 | Upstream region | C            | C (100%)                              | C (100%)                                    | T (17%)                                 | C (100%)                      |                                                    |
| 23,807,422                 | Upstream region | C            | C (100%)                              | T (5%)*                                     | T (18%)                                 | C (100%)                      |                                                    |
| 23,807,416                 | Upstream region | C            | C (100%)                              | C (100%)                                    | T (11%)                                 | C (100%)                      |                                                    |
| 23,807,363                 | Upstream region | G            | G (100%)                              | A (11%)                                     | G (100%)                                | G (100%)                      |                                                    |
| 23,807,360                 | Upstream region | G            | G (98%)                               | A (13%)                                     | G (100%)                                | G (100%)                      |                                                    |
| 23,807,259                 | Exon 1 (Signal) | CG <u>G</u>  | CG <u>G</u> (100%)                    | CG <u>A</u> (8%)*                           | CG <u>A</u> (21%)                       | CG <u>G</u> (100%)            | GCC→A <sub>12(sp)</sub><br>GCU→A <sub>12(sp)</sub> |
| 23,807,241                 | Exon 1 (Signal) | GAC          | GAG (93%)                             | GAG (100%)                                  | GAG (82%)                               | GAC (100%)                    | CUG→L <sub>18(sp)</sub><br>CUC→L <sub>18(sp)</sub> |
| 23,807,151                 | Exon 1          | GT <u>G</u>  | GT <u>G</u> (100%)                    | GT <u>A</u> (13%)                           | GT <u>G</u> (100%)                      | GT <u>G</u> (100%)            | CAC→H <sub>29</sub><br>CAU→H <sub>29</sub>         |
| 23,807,145                 | Exon 1          | CAG          | CAG (100%)                            | CAA (13%)                                   | CAA (7%)*                               | CAG (100%)                    | GUC→V <sub>31</sub><br>GUU→V <sub>31</sub>         |
| 23,807,100                 | Exon 1          | GCG          | GCG (100%)                            | GCA (4%)*                                   | GCA (12%)                               | GCG (100%)                    | CGC→R <sub>46</sub><br>CGU→R <sub>46</sub>         |
| 23,807,076                 | Exon 1          | TCC          | TCC (100%)                            | TCC (100%)                                  | TCT (13%)                               | TCC (100%)                    | AGG→R <sub>54</sub><br>AGA→R <sub>54</sub>         |
| 23,807,038                 | Intron 1        | C            | C (100%)                              | T (15%)                                     | C (100%)                                | C (100%)                      |                                                    |
| 23,807,028                 | Intron 1        | A            | C (100%)                              | C (100%)                                    | C (95%)                                 | C (97%)                       |                                                    |
| 23,807,019                 | Intron 1        | G            | G (100%)                              | A (14%)                                     | A (4%)*                                 | G (100%)                      |                                                    |
| 23,807,018                 | Intron 1        | G            | G (100%)                              | A (14%)                                     | A (4%)*                                 | G (100%)                      |                                                    |
| 23,806,929                 | Intron 1        | A            | A (100%)                              | A (95%)                                     | A (100%)                                | C (100%)                      |                                                    |
| 23,806,880                 | Intron 1        | G            | G (100%)                              | G (100%)                                    | A (12%)                                 | G (100%)                      |                                                    |
| 23,806,827                 | Intron 1        | G            | G (100%)                              | A (15%)                                     | A (5%)*                                 | G (100%)                      |                                                    |

|            |          |   |          |          |          |          |
|------------|----------|---|----------|----------|----------|----------|
| 23,806,821 | Intron 1 | G | G (100%) | G (100%) | A (14%)  | G (100%) |
| 23,806,811 | Intron 1 | G | G (100%) | G (100%) | A (12%)  | G (100%) |
| 23,806,715 | Intron 1 | G | G (100%) | G (100%) | A (14%)  | G (100%) |
| 23,806,695 | Intron 1 | G | G (100%) | A (12%)  | G (100%) | G (100%) |
| 23,806,690 | Intron 1 | G | A (3%)*  | G (100%) | A (18%)  | G (100%) |
| 23,806,685 | Intron 1 | G | G (100%) | A (12%)  | A (17%)  | G (100%) |
| 23,806,655 | Intron 1 | C | C (100%) | C (100%) | T (15%)  | C (100%) |
| 23,806,653 | Intron 1 | C | C (100%) | C (100%) | T (12%)  | C (100%) |
| 23,806,536 | Intron 1 | T | T (100%) | T (100%) | T (100%) | C (100%) |
| 23,806,513 | Intron 1 | G | G (100%) | A (13%)  | G (100%) | G (100%) |
| 23,806,507 | Intron 1 | A | G (100%) | G (100%) | A (13%)  | G (100%) |
| 23,806,506 | Intron 1 | G | A (3%)*  | G (100%) | A (17%)  | G (100%) |
| 23,806,468 | Intron 1 | G | G (100%) | A (17%)  | A (9%)*  | G (100%) |
| 23,806,466 | Intron 1 | G | G (100%) | G (100%) | A (13%)  | G (100%) |
| 23,806,452 | Intron 1 | A | G (97%)  | G (100%) | G (89%)  | A (96%)  |
| 23,806,416 | Intron 1 | G | G (100%) | A (11%)  | A (7%)*  | G (100%) |
| 23,806,387 | Intron 1 | G | G (100%) | A (25%)  | A (4%)*  | G (100%) |
| 23,806,383 | Intron 1 | C | C (100%) | T (17%)  | T (9%)*  | C (100%) |
| 23,806,310 | Intron 1 | C | C (100%) | C (100%) | T (12%)  | T (3%)*  |
| 23,806,290 | Intron 1 | C | C (100%) | T (11%)  | C (100%) | T (4%)*  |
| 23,806,278 | Intron 1 | C | C (100%) | C (100%) | T (18%)  | C (100%) |
| 23,806,274 | Intron 1 | C | C (100%) | T (6%)*  | T (11%)  | C (100%) |
| 23,806,273 | Intron 1 | C | C (100%) | C (100%) | T (11%)  | C (100%) |
| 23,806,183 | Intron 1 | A | A (100%) | A (100%) | A (100%) | G (100%) |
| 23,806,108 | Intron 1 | C | C (100%) | C (100%) | T (15%)  | C (100%) |
| 23,806,105 | Intron 1 | C | C (100%) | C (100%) | T (18%)  | C (100%) |
| 23,806,095 | Intron 1 | C | G (76%)  | G (22%)  | C (100%) | C (100%) |
| 23,806,079 | Intron 1 | G | G (98%)  | A (11%)  | G (100%) | G (100%) |
| 23,806,071 | Intron 1 | G | G (100%) | G (97%)  | A (12%)  | G (100%) |
| 23,806,039 | Intron 1 | G | G (100%) | A (4%)*  | G (100%) | A (28%)  |
| 23,805,961 | Intron 1 | C | T (2%)*  | T (14%)  | C (100%) | C (100%) |
| 23,805,846 | Intron 2 | C | C (100%) | T (6%)*  | T (11%)  | C (100%) |
| 23,805,832 | Intron 2 | G | A (92%)  | A (93%)  | A (92%)  | A (97%)  |
| 23,805,800 | Intron 2 | C | C (100%) | T (4%)*  | T (11%)  | C (100%) |
| 23,805,798 | Intron 2 | C | C (100%) | T (11%)  | C (94%)  | C (100%) |

|            |          |   |             |             |             |             |
|------------|----------|---|-------------|-------------|-------------|-------------|
| 23,805,785 | Intron 2 | A | G (14%)     | G (3%)*     | A (100%)    | G (4%)*     |
| 23,805,773 | Intron 2 | T | T (100%)    | G (11%)     | G (6%)*     | G (2%)*     |
| 23,805,769 | Intron 2 | C | C (100%)    | T (11%)     | C (100%)    | C (100%)    |
| 23,805,758 | Intron 2 | C | C (100%)    | T (3%)*     | T (20%)     | C (100%)    |
| 23,805,754 | Intron 2 | C | C (100%)    | C (100%)    | T (24%)     | C (100%)    |
| 23,805,750 | Intron 2 |   | InsAC (25%) | InsAC (6%)* | InsAC (9%)* | InsAC (15%) |
| 23,805,746 | Intron 2 | C | C (100%)    | T (10%)*    | T (15%)     | C (100%)    |
| 23,805,738 | Intron 2 | C | T (44%)     | T (13%)     | T (26%)     | C (100%)    |
| 23,805,720 | Intron 2 | T | C (49%)     | C (67%)     | C (48%)     | C (59%)     |
| 23,805,712 | Intron 2 | T | C (46%)     | C (31%)     | C (45%)     | C (36%)     |
| 23,805,686 | Intron 2 | A | C (24%)     | C (12%)     | C (27%)     | C (10%)*    |
| 23,805,680 | Intron 2 | T | G (23%)     | G (9%)*     | G (24%)     | G (7%)*     |
| 23,805,674 | Intron 2 | T | C (18%)     | C (6%)*     | C (23%)     | C (3%)*     |
| 23,805,632 | Intron 2 | C | C (98%)     | C (100%)    | T (13%)     | C (100%)    |
| 23,805,630 | Intron 2 | C | C (100%)    | T (19%)     | T (6%)*     | C (100%)    |
| 23,805,599 | Intron 2 | G | G (98%)     | A (15%)     | A (3%)*     | G (100%)    |
| 23,805,548 | Intron 2 | C | C (98%)     | C (100%)    | C (100%)    | G (88%)     |
| 23,805,532 | Intron 2 | C | T (2%)*     | C (100%)    | T (11%)     | T (5%)*     |
| 23,805,507 | Intron 2 | C | C (100%)    | C (100%)    | T (11%)     | C (100%)    |
| 23,805,506 | Intron 2 | C | C (100%)    | C (100%)    | T (11%)     | C (100%)    |
| 23,805,505 | Intron 2 | C | C (100%)    | T (13%)     | T (17%)     | C (100%)    |
| 23,805,497 | Intron 2 | C | C (100%)    | C (100%)    | T (11%)     | C (100%)    |
| 23,805,494 | Intron 2 | C | C (98%)     | T (6%)*     | T (13%)     | C (100%)    |
| 23,805,491 | Intron 2 | C | C (100%)    | T (6%)*     | T (11%)     | C (100%)    |
| 23,805,490 | Intron 2 | C | C (100%)    | T (6%)*     | T (11%)     | C (100%)    |
| 23,805,489 | Intron 2 | C | C (100%)    | T (12%)     | T (11%)     | C (100%)    |
| 23,805,487 | Intron 2 | C | C (100%)    | C (100%)    | T (11%)     | C (100%)    |
| 23,805,469 | Intron 2 | C | C (100%)    | T (17%)     | C (100%)    | C (100%)    |
| 23,805,468 | Intron 2 | C | C (100%)    | T (11%)     | T (4%)*     | C (100%)    |
| 23,805,465 | Intron 2 | C | C (100%)    | T (11%)     | C (100%)    | C (100%)    |
| 23,805,464 | Intron 2 | G | G (100%)    | A (13%)     | G (100%)    | G (100%)    |
| 23,805,409 | Intron 2 | G | G (100%)    | A (23%)     | A (4%)*     | G (100%)    |
| 23,805,369 | Intron 2 | C | C (100%)    | C (100%)    | T (13%)     | C (100%)    |
| 23,805,365 | Intron 2 | C | C (100%)    | T (14%)     | C (100%)    | C (100%)    |
| 23,805,356 | Intron 2 | C | C (100%)    | T (10%)*    | T (13%)     | C (100%)    |

|            |          |   |          |          |                    |            |
|------------|----------|---|----------|----------|--------------------|------------|
| 23,805,329 | Intron 2 | G | G (100%) | A (6%)*  | A (15%)            | G (100%)   |
| 23,805,283 | Intron 2 | C | C (100%) | C (100%) | T (20%)            | C (100%)   |
| 23,805,282 | Intron 2 | C | C (100%) | T (7%)*  | T (20%)            | C (100%)   |
| 23,805,280 | Intron 2 | G | G (100%) | A (19%)  | G (100%)           | G (100%)   |
| 23,805,269 | Intron 2 | C | T (2%)*  | T (17%)  | C (100%)           | C (100%)   |
| 23,805,258 | Intron 2 | G | G (100%) | A (15%)  | G (100%)           | G (100%)   |
| 23,805,176 | Intron 2 | G | G (100%) | G (100%) | A (20%)            | G (100%)   |
| 23,805,167 | Intron 2 | G | G (98%)  | G (100%) | A (11%)            | G (100%)   |
| 23,805,154 | Intron 2 | G | G (98%)  | A (14%)  | A (8%)*            | G (100%)   |
| 23,805,057 | Intron 2 | C | G (4%)*  | G (6%)*  | T (14%)<br>G (11%) | C (100%)   |
| 23,805,032 | Intron 2 | G | G (100%) | A (10%)* | A (11%)            | G (100%)   |
| 23,805,026 | Intron 2 | C | C (100%) | C (100%) | T (11%)            | C (100%)   |
| 23,804,923 | Intron 2 | A | A (100%) | A (100%) | A (100%)           | delA (76%) |
| 23,804,918 | Intron 2 | C | T (4%)*  | T (12%)  | T (10%)*           | C (100%)   |
| 23,804,864 | Intron 2 | C | T (2%)*  | T (11%)  | T (5%)*            | C (100%)   |
| 23,804,863 | Intron 2 | C | C (100%) | T (12%)  | T (6%)*            | C (100%)   |
| 23,804,860 | Intron 2 | C | C (100%) | C (100%) | T (21%)            | C (100%)   |
| 23,804,858 | Intron 2 | C | T (5%)*  | T (17%)  | C (100%)           | C (100%)   |
| 23,804,856 | Intron 2 | C | T (2%)*  | T (15%)  | C (100%)           | C (100%)   |
| 23,804,854 | Intron 2 | C | C (100%) | T (15%)  | T (14%)            | C (100%)   |
| 23,804,843 | Intron 2 | G | G (100%) | A (11%)  | A (10%)*           | G (100%)   |
| 23,804,839 | Intron 2 | G | G (98%)  | A (11%)  | A (20%)            | G (100%)   |
| 23,804,838 | Intron 2 | G | G (100%) | A (11%)  | A (9%)*            | G (100%)   |
| 23,804,828 | Intron 2 | G | G (100%) | G (100%) | A (13%)            | G (100%)   |
| 23,804,794 | Intron 2 | G | G (100%) | A (12%)  | A (6%)*            | G (100%)   |
| 23,804,750 | Intron 2 | G | G (100%) | A (11%)  | A (6%)*            | G (100%)   |
| 23,804,655 | 3'UTR    | C | C (100%) | C (100%) | T (13%)            | C (100%)   |
| 23,804,647 | 3'UTR    | G | G (100%) | G (100%) | A (17%)            | G (100%)   |
| 23,804,612 | 3'UTR    | G | G (100%) | A (15%)  | A (10%)*           | G (100%)   |
| 23,804,575 | 3'UTR    | G | A (3%)*  | A (18%)  | G (100%)**         | G (100%)   |
| 23,804,515 | 3'UTR    | G | G (100%) | A (13%)  | G (100%)           | G (100%)   |
| 23,804,501 | 3'UTR    | G | G (100%) | A (14%)  | G (100%)           | G (100%)   |
| 23,804,465 | 3'UTR    | G | G (98%)  | G (100%) | A (14%)            | G (96%)    |
| 23,804,408 | 3'UTR    | T | C (11%)  | C (4%)*  | T (100%)           | C (5%)*    |

|            |                   |   |          |          |          |          |
|------------|-------------------|---|----------|----------|----------|----------|
| 23,804,370 | Downstream region | T | C (25%)  | C (21%)  | C (23%)  | C (19%)  |
| 23,804,355 | Downstream region | C | C (98%)  | T (3%)*  | T (4%)*  | T (68%)  |
| 23,804,286 | Downstream region | C | C (100%) | C (100%) | T (11%)  | C (100%) |
| 23,804,245 | Downstream region | C | C (100%) | C (100%) | T (15%)  | C (100%) |
| 23,804,180 | Downstream region | C | C (100%) | T (13%)  | T (6%)*  | C (100%) |
| 23,804,169 | Downstream region | C | C (100%) | T (20%)  | C (100%) | C (100%) |
| 23,804,167 | Downstream region | C | C (100%) | C (100%) | T (15%)  | C (100%) |
| 23,804,157 | Downstream region | C | C (100%) | C (100%) | T (18%)  | C (100%) |
| 23,804,155 | Downstream region | C | C (100%) | T (8%)*  | T (20%)  | C (100%) |
| 23,804,147 | Downstream region | G | G (100%) | A (6%)*  | A (18%)  | G (100%) |
| 23,804,131 | Downstream region | C | C (100%) | T (11%)  | T (5%)*  | C (100%) |
| 23,804,128 | Downstream region | C | C (100%) | T (15%)  | C (100%) | C (100%) |
| 23,804,089 | Downstream region | C | C (100%) | C (100%) | T (17%)  | C (100%) |
| 23,804,080 | Downstream region | C | C (100%) | T (11%)  | C (100%) | C (100%) |
| 23,804,991 | Downstream region | G | G (100%) | A (3%)*  | A (12%)  | G (100%) |
| 23,804,983 | Downstream region | C | T (2%)*  | T (11%)  | T (3%)*  | C (98%)  |
| 23,804,931 | Downstream region | C | C (98%)  | T (4%)*  | T (13%)  | C (100%) |

n.a.: not available; the variant frequency is referred to the percentage of the highlighted base in the sequenced ancient hominine genome, with\* frequency≤10% and \*\* counts<10. In light orange are underlined the variants fixed at 100% in modern human compared to ancient hominines.
