# Supplementary material for: A Catalog of Coding Sequence Variations in Salivary Proteins’ Genes Occurring during Recent Human Evolution
Source: MDPI journal article supplement (doi:10.3390/ijms241915010), 2023-10-09
Supplement: s1 [file s1]

Table S15. Nucleotide Substitutions in *CST5* gene in introns and regulatory regions

| Genomic Coordinates (hg19) | Gene Region      | Modern human | Altai Neanderthal (Variant Frequency) | Chagyrskaya                     | Vindija                         | Denisovan (Variant Frequency) | Codon→ amino acid                                |
|----------------------------|------------------|--------------|---------------------------------------|---------------------------------|---------------------------------|-------------------------------|--------------------------------------------------|
|                            |                  |              |                                       | Neanderthal (Variant Frequency) | Neanderthal (Variant Frequency) |                               |                                                  |
| 23,860,839                 | Upstream regions | C            | C (100%)                              | C (100%)                        | T (14%)                         | C (100%)                      |                                                  |
| 23,860,785                 | Upstream regions | G            | G (100%)                              | A (4%)*                         | A (11%)                         | G (100%)                      |                                                  |
| 23,860,782                 | Upstream regions | G            | G (100%)                              | A (4%)*                         | A (18%)                         | G (100%)                      |                                                  |
| 23,860,761                 | Upstream regions | G            | A (2%)*                               | A (4%)*                         | A (19%)                         | G (100%)                      |                                                  |
| 23,860,736                 | Upstream regions | G            | G (100%)                              | A (4%)*                         | A (11%)                         | G (100%)                      |                                                  |
| 23,860,710                 | Upstream regions | G            | G (100%)                              | A (12%)                         | A (7%)*                         | G (100%)                      |                                                  |
| 23,860,681                 | Upstream regions | C            | C (98%)                               | C (100%)                        | T (13%)                         | C (100%)                      |                                                  |
| 23,860,680                 | Upstream regions | C            | C (100%)                              | T (4%)*                         | T (13%)                         | C (100%)                      |                                                  |
| 23,860,677                 | Upstream regions | C            | C (96%)                               | T (4%)*                         | T (18%)                         | C (100%)                      |                                                  |
| 23,860,626                 | Upstream regions | C            | C (100%)                              | C (100%)                        | T (11%)                         | C (100%)                      |                                                  |
| 23,860,613                 | Upstream regions | C            | C (100%)                              | T (12%)                         | T (8%)*                         | C (100%)                      |                                                  |
| 23,860,587                 | Upstream regions | C            | T (3%)*                               | C (100%)                        | T (13%)                         | C (100%)                      |                                                  |
| 23,860,567                 | Upstream regions | C            | C (97%)                               | T (15%)                         | T (5%)*                         | C (100%)                      |                                                  |
| 23,860,550                 | Upstream regions | C            | C (97%)                               | T (9%)*                         | T (15%)                         | C (100%)                      |                                                  |
| 23,860,548                 | Upstream regions | C            | C (100%)                              | C (100%)                        | T (11%)                         | C (100%)                      |                                                  |
| 23,860,523                 | Upstream regions | C            | C (100%)                              | T (3%)*                         | T (19%)                         | C (100%)                      |                                                  |
| 23,860,513                 | Upstream regions | C            | C (100%)                              | T (9%)*                         | T (13%)                         | C (100%)                      |                                                  |
| 23,860,498                 | Upstream regions | C            | G (97%)                               | G (100%)                        | G (92%)                         | C (100%)                      |                                                  |
| 23,860,482                 | Upstream regions | C            | C (100%)                              | T (11%)**                       | T (13%)                         | C (100%)                      |                                                  |
| 23,860,481                 | Upstream regions | C            | C (100%)                              | C (100%)                        | T (14%)                         | C (100%)                      |                                                  |
| 23,860,468                 | Upstream regions | C            | C (100%)                              | C (100%)                        | T (14%)                         | C (100%)                      |                                                  |
| 23,860,466                 | Upstream regions | C            | C (100%)                              | C (100%)                        | T (14%)                         | C (100%)                      |                                                  |
| 23,860,435                 | Upstream regions | C            | C (100%)                              | T (7%)*                         | T (13%)                         | C (100%)                      |                                                  |
| 23,860,434                 | Upstream regions | C            | C (100%)                              | T (8%)*                         | T (13%)                         | C (100%)                      |                                                  |
| 23,860,289                 | Exon 1 (Signal)  | <u>G</u> AC  | <u>G</u> AC (100%)                    | <u>A</u> AC (4%)*               | <u>A</u> AC (17%)               | <u>G</u> AC (100%)            | CUG→L <sup>9(sp)</sup><br>UUG→L <sup>9(sp)</sup> |
| 23,860,227                 | Exon 1           | TG <u>G</u>  | TG <u>G</u> (100%)                    | TG <u>A</u> (17%)               | TG <u>A</u> (6%)*               | TG <u>G</u> (100%)            | ACC→T <sub>9</sub><br>ACA→T <sub>9</sub>         |
| 23,860,212                 | Exon 1           | TA <u>G</u>  | TA <u>G</u> (100%)                    | TA <u>G</u> (92%)               | TAA (12%)                       | TA <u>G</u> (100%)            | AUC→I <sub>14</sub><br>AUU→I <sub>14</sub>       |
| 23,860,158                 | Exon 1           | TA <u>G</u>  | TA <u>G</u> (100%)                    | TA <u>G</u> (100%)              | TAA (13%)                       | TA <u>G</u> (100%)            | AUC→I <sub>32</sub><br>AUU→I <sub>32</sub>       |

|            |          |            |                   |                  |                  |                   |                                            |
|------------|----------|------------|-------------------|------------------|------------------|-------------------|--------------------------------------------|
| 23,860,152 | Exon 1   | <u>CTC</u> | <u>CTC</u> (100%) | <u>CTT</u> (7%)* | <u>CTT</u> (14%) | <u>CTC</u> (100%) | GAG→E <sub>34</sub><br>GAA→E <sub>34</sub> |
| 23,860,113 | Exon 1   | <u>GCG</u> | <u>GCG</u> (100%) | <u>GCA</u> (17%) | <u>GCA</u> (9%)* | <u>GCG</u> (100%) | CGC→R <sub>47</sub><br>CGU→R <sub>47</sub> |
| 23,860,083 | Exon 1   | <u>GTC</u> | <u>GTC</u> (100%) | <u>GTT</u> (7%)* | <u>GTT</u> (12%) | <u>GTC</u> (100%) | CAG→Q <sub>57</sub><br>CAA→Q <sub>57</sub> |
| 23,860,082 | Intron 1 | C          | C (100%)          | C (100%)         | T (13%)          | C (100%)          |                                            |
| 23,860,079 | Intron 1 | G          | G (100%)          | A (6%)*          | A (13%)          | G (100%)          |                                            |
| 23,860,046 | Intron 1 | T          | T (100%)          | T (100%)         | T (100%)         | G (100%)          |                                            |
| 23,860,033 | Intron 1 | C          | C (100%)          | T (8%)*          | T (18%)          | C (100%)          |                                            |
| 23,860,027 | Intron 1 | G          | G (100%)          | G (100%)         | A (14%)          | G (100%)          |                                            |
| 23,859,994 | Intron 1 | G          | G (100%)          | A (8%)*          | A (13%)          | G (100%)          |                                            |
| 23,859,956 | Intron 1 | G          | G (100%)          | A (13%)          | A (3%)*          | G (100%)          |                                            |
| 23,859,950 | Intron 1 | C          | C (100%)          | T (14%)          | T (6%)*          | T (3%)*           |                                            |
| 23,859,906 | Intron 1 | G          | A (94%)           | A (88%)          | A (82%)          | A (94%)           |                                            |
| 23,859,861 | Intron 1 | G          | G (100%)          | G (100%)         | A (14%)          | G (100%)          |                                            |
| 23,859,816 | Intron 1 | G          | G (100%)          | G (100%)         | A (17%)          | G (100%)          |                                            |
| 23,859,798 | Intron 1 | C          | C (100%)          | C (100%)         | T (12%)          | C (100%)          |                                            |
| 23,859,753 | Intron 1 | C          | T (100%)          | T (100%)         | T (100%)         | T (100%)          |                                            |
| 23,859,750 | Intron 1 | C          | C (100%)          | T (3%)*          | T (11%)          | C (100%)          |                                            |
| 23,859,700 | Intron 1 | G          | G (100%)          | A (4%)*          | A (18%)          | G (100%)          |                                            |
| 23,859,653 | Intron 1 | C          | C (100%)          | T (11%)          | C (100%)         | C (100%)          |                                            |
| 23,859,644 | Intron 1 | C          | C (100%)          | C (100%)         | T (11%)          | C (100%)          |                                            |
| 23,859,604 | Intron 1 | G          | G (100%)          | A (23%)          | G (100%)         | G (100%)          |                                            |
| 23,859,603 | Intron 1 | G          | G (100%)          | A (15%)          | G (100%)         | G (100%)          |                                            |
| 23,859,586 | Intron 1 | C          | C (100%)          | C (83%)          | T (14%)          | C (100%)          |                                            |
| 23,859,570 | Intron 1 | C          | C (100%)          | T (15%)          | T (10%)*         | C (100%)          |                                            |
| 23,859,460 | Intron 1 | C          | C (100%)          | C (100%)         | T (11%)          | C (100%)          |                                            |
| 23,859,440 | Intron 1 | G          | G (100%)          | G (100%)         | A (11%)          | G (100%)          |                                            |
| 23,859,396 | Intron 1 | G          | G (100%)          | G (100%)         | A (18%)          | G (100%)          |                                            |
| 23,859,394 | Intron 1 | C          | C (100%)          | C (100%)         | T (12%)          | C (100%)          |                                            |
| 23,859,314 | Intron 1 | G          | G (100%)          | A (11%)          | G (100%)         | G (100%)          |                                            |
| 23,859,282 | Intron 1 | G          | G (100%)          | G (100%)         | A (11%)          | G (100%)          |                                            |
| 23,859,246 | Intron 1 | C          | C (100%)          | C (100%)         | T (11%)          | C (100%)          |                                            |
| 23,859,213 | Intron 1 | C          | C (100%)          | C (100%)         | T (14%)          | C (100%)          |                                            |
| 23,859,210 | Intron 1 | C          | C (100%)          | T (6%)*          | T (15%)          | C (100%)          |                                            |
| 23,859,131 | Intron 1 | C          | C (100%)          | T (5%)*          | T (13%)          | C (100%)          |                                            |

|            |          |             |                    |                   |                   |                    |                                             |
|------------|----------|-------------|--------------------|-------------------|-------------------|--------------------|---------------------------------------------|
| 23,859,086 | Intron 1 | G           | G (100%)           | G (100%)          | A (11%)           | G (100%)           |                                             |
| 23,859,050 | Intron 1 | G           | A (27%)            | A (36%)           | A (47%)           | G (97%)            |                                             |
| 23,859,019 | Intron 1 | A           | G (48%)            | G (50%)           | G (33%)           | G (45%)            |                                             |
| 23,859,017 | Intron 1 | A           | C (47%)            | C (43%)           | C (65%)           | C (43%)            |                                             |
| 23,859,015 | Intron 1 | C           | C (100%)           | C (100%)          | T (11%)           | C (100%)           |                                             |
| 23,858,984 | Intron 1 | G           | T (48%)            | T (43%)           | T (41%)           | T (46%)            |                                             |
| 23,858,950 | Intron 1 | C           | C (100%)           | T (21%)           | T (7%)*           | C (100%)           |                                             |
| 23,858,924 | Intron 1 | A           | A (100%)           | A (100%)          | A (100%)          | C (25%)            |                                             |
| 23,858,901 | Intron 1 | C           | C (100%)           | T (3%)*           | T (13%)           | T (2%)*            |                                             |
| 23,858,897 | Intron 1 | A           | G (62%)            | G (67%)           | A (100%)          | A (97%)            |                                             |
| 23,858,775 | Intron 1 | A           | G (95%)            | G (93%)           | G (87%)           | A (100%)           |                                             |
| 23,858,746 | Intron 1 | G           | G (100%)           | A (12%)           | A (4%)*           | G (100%)           |                                             |
| 23,858,715 | Intron 1 | T           | T (100%)           | T (100%)          | T (100%)          | A (100%)           |                                             |
| 23,858,705 | Intron 1 | G           | G (100%)           | A (9%)*           | A (20%)           | G (100%)           |                                             |
| 23,858,701 | Intron 1 | G           | G (100%)           | A (12%)           | G (100%)          | G (100%)           |                                             |
| 23,858,698 | Intron 1 | G           | G (100%)           | A (11%)           | G (100%)          | G (100%)           |                                             |
| 23,858,689 | Intron 1 | C           | C (100%)           | C (100%)          | T (13%)           | C (100%)           |                                             |
| 23,858,675 | Intron 1 | C           | C (100%)           | C (100%)          | T (14%)           | C (100%)           |                                             |
| 23,858,614 | Intron 1 | C           | G (100%)           | G (95%)           | G (91%)           | C (96%)            |                                             |
| 23,858,542 | Intron 1 | C           | C (100%)           | C (100%)          | T (13%)           | C (100%)           |                                             |
| 23,858,526 | Intron 1 | G           | G (100%)           | G (100%)          | A (18%)           | G (100%)           |                                             |
| 23,858,525 | Intron 1 | G           | G (100%)           | G (100%)          | A (12%)           | G (100%)           |                                             |
| 23,858,521 | Intron 1 | G           | G (100%)           | A (6%)*           | A (11%)           | G (100%)           |                                             |
| 23,858,517 | Intron 1 | G           | G (100%)           | G (100%)          | A (11%)           | G (100%)           |                                             |
| 23,858,514 | Intron 1 | G           | G (100%)           | G (100%)          | A (22%)           | G (100%)           |                                             |
| 23,858,509 | Intron 1 | G           | G (98%)            | A (11%)           | G (100%)          | G (100%)           |                                             |
| 23,858,506 | Intron 1 | G           | G (100%)           | A (11%)           | G (100%)          | G (100%)           |                                             |
| 23,858,428 | Intron 1 | A           | G (100%)           | G (100%)          | G (100%)          | G (100%)           |                                             |
| 23,858,419 | Intron 1 | G           | G (100%)           | G (100%)          | A (15%)           | G (100%)           |                                             |
| 23,858,324 | Intron 1 | C           | C (100%)           | T (12%)           | T (5%)*           | C (100%)           |                                             |
| 23,858,263 | Intron 1 | C           | C (100%)           | C (100%)          | T (25%)           | C (100%)           |                                             |
| 23,858,235 | Exon 2   | AT <u>G</u> | AT <u>G</u> (100%) | AT <u>A</u> (12%) | AT <u>G</u> (98%) | AT <u>G</u> (100%) | UAC→Y <sub>64</sub><br>UAU →Y <sub>64</sub> |
| 23,858,119 | Intron 2 | C           | C (100%)           | T (11%)           | C (100%)          | C (100%)           |                                             |
| 23,858,110 | Intron 2 | C           | C (100%)           | T (4%)*           | T (11%)           | C (100%)           |                                             |
| 23,858,107 | Intron 2 | G           | G (100%)           | G (100%)          | A (11%)           | G (100%)           |                                             |

|            |          |   |          |          |          |          |
|------------|----------|---|----------|----------|----------|----------|
| 23,858,097 | Intron 2 | C | C (100%) | T (13%)  | C (100%) | C (100%) |
| 23,858,085 | Intron 2 | C | C (100%) | T (4%)*  | T (14%)  | C (100%) |
| 23,858,067 | Intron 2 | C | C (100%) | C (100%) | T (17%)  | C (97%)  |
| 23,858,062 | Intron 2 | G | A (2%)*  | G (100%) | A (11%)  | G (100%) |
| 23,858,002 | Intron 2 | C | C (100%) | T (11%)  | C (100%) | C (100%) |
| 23,857,908 | Intron 2 | C | C (100%) | T (12%)  | T (3%)*  | C (100%) |
| 23,857,868 | Intron 2 | C | C (100%) | T (2%)*  | T (12%)  | C (100%) |
| 23,857,813 | Intron 2 | G | G (100%) | G (100%) | A (12%)  | G (100%) |
| 23,857,779 | Intron 2 | C | C (100%) | T (7%)*  | T (12%)  | C (100%) |
| 23,857,772 | Intron 2 | C | C (100%) | C (100%) | T (12%)  | C (100%) |
| 23,857,767 | Intron 2 | C | C (100%) | T (3%)*  | T (17%)  | C (100%) |
| 23,857,762 | Intron 2 | C | C (100%) | C (100%) | T (19%)  | C (100%) |
| 23,857,753 | Intron 2 | C | C (100%) | C (100%) | T (23%)  | C (100%) |
| 23,857,704 | Intron 2 | C | C (100%) | T (11%)  | C (100%) | C (100%) |
| 23,857,680 | Intron 2 | C | C (100%) | C (100%) | T (14%)  | C (100%) |
| 23,857,675 | Intron 2 | C | T (2%)*  | T (19%)  | T (5%)*  | C (100%) |
| 23,857,633 | Intron 2 | G | G (100%) | A (4%)*  | A (20%)  | G (100%) |
| 23,857,624 | Intron 2 | C | C (100%) | C (100%) | T (11%)  | C (100%) |
| 23,857,615 | Intron 2 | C | C (100%) | C (95%)  | T (12%)  | C (100%) |
| 23,857,603 | Intron 2 | C | T (3%)*  | C (100%) | T (11%)  | C (100%) |
| 23,857,589 | Intron 2 | C | C (100%) | T (5%)*  | T (14%)  | C (100%) |
| 23,857,530 | Intron 2 | G | G (100%) | A (5%)*  | A (11%)  | G (100%) |
| 23,857,436 | Intron 2 | C | T (100%) | T (100%) | T (100%) | C (100%) |
| 23,857,434 | Intron 2 | G | G (100%) | G (100%) | A (14%)  | G (100%) |
| 23,857,408 | Intron 2 | G | G (100%) | A (3%)*  | A (14%)  | G (100%) |
| 23,857,366 | Intron 2 | C | C (98%)  | T (8%)*  | T (11%)  | C (100%) |
| 23,857,361 | Intron 2 | C | C (100%) | C (100%) | T (15%)  | C (100%) |
| 23,857,329 | Intron 2 | G | A (35%)  | G (100%) | A (4%)*  | G (100%) |
| 23,857,261 | Intron 2 | C | C (100%) | T (11%)  | T (10%)* | C (100%) |
| 23,857,232 | Intron 2 | C | T (2%)*  | C (100%) | T (18%)  | C (100%) |
| 23,857,230 | Intron 2 | C | C (98%)  | C (100%) | T (15%)  | C (100%) |
| 23,857,228 | Intron 2 | C | C (98%)  | T (4%)*  | T (16%)  | C (100%) |
| 23,857,224 | Intron 2 | G | G (100%) | A (5%)*  | A (11%)  | G (100%) |
| 23,857,208 | Intron 2 | G | G (100%) | A (5%)*  | A (11%)  | G (100%) |
| 23,857,207 | Intron 2 | G | G (100%) | A (15%)  | A (5%)*  | G (100%) |

|            |          |   |          |          |          |          |
|------------|----------|---|----------|----------|----------|----------|
| 23,857,206 | Intron 2 | G | G (100%) | A (10%)* | A (15%)  | G (100%) |
| 23,857,195 | Intron 2 | G | G (100%) | A (4%)*  | A (15%)  | G (100%) |
| 23,857,183 | Intron 2 | G | G (100%) | A (14%)  | A (8%)*  | G (100%) |
| 23,857,081 | Intron 2 | G | G (100%) | A (4%)*  | A (13%)  | G (95%)  |
| 23,857,075 | Intron 2 | G | G (100%) | A (4%)*  | A (14%)  | G (95%)  |
| 23,857,068 | Intron 2 | C | C (98%)  | T (4%)*  | T (27%)  | C (100%) |
| 23,857,062 | Intron 2 | G | G (100%) | G (100%) | A (13%)  | G (95%)  |
| 23,857,058 | Intron 2 | C | C (100%) | C (100%) | T (13%)  | C (100%) |
| 23,857,044 | Intron 2 | C | C (100%) | C (100%) | T (13%)  | T (5%)*  |
| 23,857,043 | Intron 2 | C | C (100%) | C (100%) | T (12%)  | C (100%) |
| 23,857,034 | Intron 2 | C | C (100%) | T (7%)*  | T (14%)  | C (100%) |
| 23,857,027 | Intron 2 | C | C (100%) | T (12%)  | T (6%)*  | C (100%) |
| 23,857,021 | Intron 2 | C | C (100%) | C (100%) | T (13%)  | C (100%) |
| 23,857,020 | Intron 2 | C | C (100%) | C (100%) | T (11%)  | C (100%) |
| 23,857,012 | Intron 2 | G | G (100%) | A (11%)  | G (100%) | G (100%) |
| 23,857,010 | Intron 2 | G | G (100%) | A (12%)  | G (100%) | G (100%) |
| 23,856,990 | Intron 2 | G | G (100%) | A (13%)  | G (100%) | G (100%) |
| 23,856,956 | Intron 2 | G | G (100%) | A (13%)  | A (3%)*  | G (100%) |
| 23,856,822 | 3' UTR   | C | C (100%) | C (100%) | T (11%)  | C (100%) |
| 23,856,812 | 3' UTR   | C | C (100%) | T (6%)*  | T (14%)  | C (100%) |
| 23,856,781 | 3' UTR   | G | G (100%) | G (100%) | A (18%)  | G (100%) |
| 23,856,763 | 3' UTR   | G | G (100%) | A (9%)*  | A (15%)  | G (100%) |
| 23,856,748 | 3' UTR   | G | G (100%) | G (100%) | A (11%)  | G (100%) |
| 23,856,745 | 3' UTR   | G | G (100%) | A (15%)  | A (5%)*  | G (100%) |
| 23,856,712 | 3' UTR   | G | G (100%) | G (100%) | A (11%)  | G (100%) |
| 23,856,711 | 3' UTR   | G | G (100%) | A (9%)*  | A (11%)  | G (100%) |
| 23,856,709 | 3' UTR   | C | C (100%) | C (95%)  | T (11%)  | C (100%) |
| 23,856,663 | 3' UTR   | T | C (97%)  | C (91%)  | C (100%) | C (100%) |
| 23,856,661 | 3' UTR   | C | C (100%) | T (11%)  | C (100%) | C (100%) |
| 23,856,657 | 3' UTR   | A | A (100%) | G (11%)  | A (100%) | A (100%) |
| 23,856,655 | 3' UTR   | G | G (100%) | A (11%)  | A (8%)*  | G (100%) |
| 23,856,654 | 3' UTR   | G | G (100%) | A (6%)*  | A (14%)  | G (100%) |
| 23,856,639 | 3' UTR   | G | G (100%) | A (5%)*  | A (13%)  | G (100%) |
| 23,856,624 | 3' UTR   | G | G (100%) | A (12%)  | A (12%)  | G (100%) |
| 23,856,623 | 3' UTR   | G | G (100%) | G (100%) | A (12%)  | G (100%) |

|            |                   |   |          |          |          |          |
|------------|-------------------|---|----------|----------|----------|----------|
| 23,856,601 | 3' UTR            | G | G (100%) | A (12%)  | G (100%) | G (100%) |
| 23,856,531 | Downstream region | C | C (98%)  | T (11%)  | T (4%)*  | C (100%) |
| 23,856,478 | Downstream region | C | C (100%) | T (4%)*  | T (13%)  | C (100%) |
| 23,856,475 | Downstream region | C | C (100%) | C (100%) | T (14%)  | C (95%)  |
| 23,856,461 | Downstream region | C | C (100%) | T (4%)*  | T (14%)  | C (95%)  |
| 23,856,444 | Downstream region | C | C (100%) | C (100%) | T (17%)  | C (100%) |
| 23,856,432 | Downstream region | C | C (100%) | T (6%)*  | T (12%)  | T (4%)*  |
| 23,856,407 | Downstream region | C | C (100%) | T (15%)  | T (4%)*  | C (100%) |
| 23,856,338 | Downstream region | C | C (100%) | T (11%)  | T (2%)*  | C (100%) |
| 23,856,305 | Downstream region | G | G (100%) | A (11%)  | A (17%)  | G (100%) |
| 23,856,263 | Downstream region | G | G (100%) | A (13%)  | G (100%) | G (100%) |
| 23,856,223 | Downstream region | C | C (100%) | T (11%)  | T (5%)*  | C (100%) |
| 23,856,186 | Downstream region | G | G (100%) | A (15%)  | A (2%)*  | G (100%) |
| 23,856,165 | Downstream region | G | G (100%) | A (14%)  | G (100%) | G (97%)  |
| 23,856,108 | Downstream region | C | C (100%) | C (100%) | T (13%)  | C (100%) |
| 23,856,092 | Downstream region | G | G (100%) | A (11%)  | G (100%) | G (100%) |
| 23,856,083 | Downstream region | G | G (100%) | A (13%)  | G (100%) | G (100%) |
| 23,856,029 | Downstream region | C | C (100%) | T (11%)  | T (5%)*  | C (100%) |

n.a.: not available; the variant frequency is referred to the percentage of the highlighted base in the sequenced ancient hominine genome, with\* frequency≤10% and \*\* counts<10. In light orange are underlined the variants fixed at 100% in modern human compared to ancient hominines.
