# Supplementary material for: A Catalog of Coding Sequence Variations in Salivary Proteins’ Genes Occurring during Recent Human Evolution
Source: Int J Mol Sci. 2023 Oct 9;24(19):15010. doi: 10.3390/ijms241915010 (PMC10573131; doi:10.3390/ijms241915010)
Supplement: Supplementary file 1 [file ijms-24-15010-s001.zip]

Archive with 20 entries (20 files):
- File S1.pdf
- File S2 new.pdf
- File S3.xlsx
- Table S1.pdf
- Table S10 .pdf
- Table S11.pdf
- Table S12 .pdf
- Table S13 .pdf
- Table S14 .pdf
- Table S15.pdf
- Table S16 .pdf
- Table S17 .pdf
- Table S2 .pdf
- Table S3 .pdf
- Table S4 .pdf
- Table S5.pdf
- Table S6 .pdf
- Table S7.pdf
- Table S8 .pdf
- Table S9 .pdf
