# Supplementary material for: A Catalog of Coding Sequence Variations in Salivary Proteins’ Genes Occurring during Recent Human Evolution
Source: Int J Mol Sci. 2023 Oct 9;24(19):15010. doi: 10.3390/ijms241915010 (PMC10573131; doi:10.3390/ijms241915010)
Supplement: Supplementary file 1 [file ijms-24-15010-s001.zip › File S3.xlsx]

## Sheet: Tajima_D
CST1_CHR 20		CST2_CHR 20		CST3_CHR20		POS_START		CST5_CHR 20		CSTA_CHR3		CSTB_CHR 21		PRB1_CHR12		PRB2_CHR12		PRB3_CHR12		PRB4_CHR12
SNP position	TajimaD	SNP position	TajimaD	SNP position	TajimaD	SNP position	TajimaD	SNP position	TajimaD	SNP position	TajimaD	SNP position	TajimaD	SNP position	TajimaD	SNP position	TajimaD	SNP position	TajimaD	SNP position	TajimaD
23728201	-0.617781	23804413	-0.630366	23607379	-0.349747	23666279	-0.698766	23856574	-0.698766	122044128	-0.696219	45192403	-0.698766	11504777	-0.693674	11544474	-0.693674	11420369	0.0285155	11460037	-0.66574
23728202	-0.698766	23804433	-0.693674	23607385	-0.698766	23666280	-0.698766	23856602	-0.698766	122044157	-0.698766	45192440	-0.585179	11504818	-0.698766	11544513	-0.698766	11420370	0.0285155	11460063	1.65785
23728233	1.45713	23804438	-0.698766	23607426	-0.698766	23666283	-0.678422	23856651	-0.696219	122044230	-0.698766	45192524	-0.693674	11504849	-0.693674	11544525	2.4276	11420375	1.28846	11460068	-0.698766
23728253	-0.612754	23804519	-0.693674	23607466	-0.698766	23666300	-0.698766	23856663	2.46401	122044253	-0.698766	45192578	-0.547775	11504854	-0.696219	11544528	3.35364	11420387	-0.683502	11460079	-0.698766
23728254	-0.691129	23804556	0.134753	23607529	-0.698766	23666302	-0.696219	23856706	-0.698766	122044382	-0.645502	45192587	-0.560217	11504864	-0.242617	11544535	-0.698766	11420400	-0.66574	11460080	-0.698766
23728258	-0.335344	23804570	-0.691129	23607552	-0.698766	23666311	-0.688586	23856744	-0.696219	122044441	-0.698766	45192594	-0.698766	11504878	-0.287599	11544541	-0.673346	11420421	-0.693674	11460094	-0.653084
23728290	-0.693674	23804577	-0.67081	23607573	-0.698766	23666319	-0.698766	23856753	-0.698766	122044455	-0.698766	45192602	-0.680961	11504911	-0.698766	11544597	-0.686043	11420454	2.48764	11460120	-0.696219
23728334	-0.693674	23804583	-0.698766	23607655	-0.580178	23666369	-0.691129	23856833	-0.698766	122044474	-0.698766	45192624	-0.696219	11504913	-0.693674	11544624	-0.532877	11420458	2.15008	11460125	-0.632886
23728342	1.49162	23804595	-0.698766	23607686	-0.698766	23666414	-0.698766	23856835	-0.653084	122044555	0.15659	45192632	-0.698766	11504973	-0.698766	11544695	-0.530398	11420524	-0.696219	11460191	-0.696219
23728364	-0.696219	23804610	-0.688586	23607703	-0.698766	23666420	-0.698766	23856837	-0.698766	122044594	-0.698766	45192692	-0.675883	11504976	-0.535357	11544700	-0.352152	11420535	-0.698766	11460231	1.65525
23728365	-0.515543	23804611	-0.691129	23607706	-0.696219	23666427	-0.698766	23856841	-0.698766	122044614	-0.698766	45192797	-0.693674	11504985	-0.698766	11544789	-0.698766	11420538	-0.698766	11460257	1.79949
23728373	-0.696219	23804622	-0.485943	23607747	-0.688586	23666431	-0.698766	23856878	-0.698766	122044692	0.15659	45192811	-0.698766	11505008	-0.698766	11544795	-0.567695	11420547	-0.642977	11460326	-0.698766
23728391	-0.698766	23804625	-0.481024	23607752	1.49162	23666438	-0.698766	23856889	-0.693674	122044728	-0.419879	45192832	-0.691129	11505023	-0.698766	11544809	-0.698766	11420587	-0.696219	11460366	-0.698766
23728406	-0.668274	23804628	-0.696219	23607754	-0.698766	23666469	-0.696219	23856900	-0.696219	122044729	-0.698766	45192840	-0.668274	11505069	-0.660674	11544819	2.44246	11420589	-0.680961	11460389	-0.675883
23728408	-0.680961	23804641	-0.696219	23607798	-0.693674	23666484	0.856799	23856942	-0.698766	122044730	-0.698766	45192844	-0.668274	11505075	-0.698766	11544902	-0.696219	11420600	-0.698766	11460396	-0.693674
23728431	-0.698766	23804646	-0.698766	23607868	-0.698766	23666528	-0.696219	23856969	-0.698766	122044773	-0.675883	45192848	-0.691129	11505087	-0.696219	11545606	-0.698766	11420615	-0.696219	11460470	-0.696219
23728432	-0.691129	23804654	-0.675883	23607874	2.45604	23666536	-0.645502	23856988	-0.66574	122044779	-0.567695	45192849	-0.688586	11505099	-0.555237	11545661	-0.698766	11420620	-0.698766	11460471	-0.557727
23728435	-0.693674	23804662	-0.696219	23607879	-0.691129	23666552	-0.698766	23856999	-0.698766	122044802	-0.691129	45192851	-0.691129	11505108	-0.698766	11545666	-0.63793	11420621	-0.181659	11460475	0.937782
23728450	-0.698766	23804663	0.0352241	23607888	-0.698766	23666576	-0.698766	23857027	-0.698766	122044813	-0.698766	45192882	-0.693674	11505226	-0.696219	11545741	-0.419879	11420627	-0.696219	11460478	-0.66574
23728510	-0.696219	23804684	-0.698766	23607922	-0.698766	23666588	-0.640453	23857068	-0.693674	122044817	-0.698766	45192894	-0.698766	11505227	-0.696219	11545743	-0.419879	11420647	-0.617781	11460549	-0.698766
23728539	-0.680961	23804691	-0.696219	23608012	-0.696219	23666596	-0.698766	23857101	-0.686043	122044824	-0.698766	45192917	-0.698766	11505243	-0.698766	11545780	-0.698766	11420673	-0.696219	11460577	-0.698766
23728547	-0.696219	23804695	-0.693674	23608015	-0.660674	23666597	-0.653084	23857104	-0.698766	122044863	-0.698766	45192953	-0.668274	11505264	-0.698766	11545786	-0.696219	11420683	-0.698766	11460672	-0.698766
23728561	-0.698766	23804703	-0.698766	23608022	-0.696219	23666604	-0.698766	23857143	-0.693674	122044977	0.976624	45192996	-0.698766	11505315	-0.698766	11545877	-0.698766	11420689	-0.698766	11460705	-0.698766
23728571	-0.698766	23804704	-0.698766	23608055	-0.696219	23666606	0.528274	23857181	-0.585179	122044981	-0.632886	45193032	-0.617781	11505375	1.23792	11545900	-0.696219	11420736	-0.698766	11460711	-0.698766
23728612	-0.356963	23804722	-0.698766	23608062	-0.698766	23666629	-0.698766	23857243	-0.658143	122045022	-0.696219	45193035	-0.693674	11505836	-0.696219	11545919	-0.698766	11420753	-0.698766	11460712	-0.698766
23728630	-0.698766	23804761	-0.698766	23608074	-0.698766	23666636	-0.698766	23857274	-0.691129	122045036	-0.698766	45193105	-0.698766	11505918	-0.698766	11545934	-0.698766	11420759	-0.696219	11460713	-0.66574
23728635	-0.698766	23804769	-0.698766	23608095	-0.698766	23666675	-0.655613	23857369	-0.698766	122045040	-0.673346	45193116	-0.675883	11505949	-0.691129	11545935	-0.655613	11420769	-0.660674	11460738	-0.698766
23728651	-0.698766	23804800	-0.698766	23608100	-0.673346	23666676	-0.698766	23857430	-0.698766	122045041	-0.693674	45193120	-0.673346	11505980	-0.693674	11545937	-0.655613	11420815	-0.696219	11460743	-0.693674
23728663	-0.696219	23804816	-0.698766	23608108	-0.691129	23666690	2.4851	23857436	-0.686043	122045220	-0.696219	45193142	-0.14912	11506085	-0.691129	11545943	-0.698766	11420836	-0.686043	11460792	-0.698766
23728677	-0.693674	23804828	-0.424747	23608148	-0.686043	23666698	-0.698766	23857443	-0.625329	122045223	-0.698766	45193143	-0.620296	11506093	-0.686043	11545953	-0.555237	11420866	-0.615267	11460795	-0.693674
23728690	-0.698766	23804849	-0.698766	23608164	-0.698766	23666699	-0.698766	23857482	-0.698766	122045274	0.238645	45193163	-0.193328	11506129	-0.673346	11545976	-0.698766	11420881	-0.696219	11460815	-0.698766
23728748	-0.642977	23804864	0.96784	23608165	-0.680961	23666713	-0.698766	23857505	-0.698766	122045370	-0.691129	45193196	-0.691129	11506141	-0.66574	11545992	-0.66574	11420884	-0.698766	11460943	-0.698766
23728756	-0.696219	23804922	0.867716	23608172	-0.696219	23666720	-0.547775	23857545	-0.696219	122045407	-0.698766	45193209	-0.686043	11506157	-0.693674	11546014	-0.691129	11420886	-0.698766	11461048	-0.698766
23728770	-0.698766	23804923	-0.693674	23608196	-0.698766	23666733	-0.693674	23857553	-0.625329	122045505	-0.698766	45193214	-0.678422	11506158	-0.698766	11546018	-0.696219	11420887	-0.698766	11461055	-0.698766
23728779	-0.696219	23804959	-0.698766	23608300	-0.683502	23666750	-0.688586	23857558	-0.686043	122045547	-0.698766	45193235	-0.698766	11506180	-0.686043	11546023	-0.698766	11420893	-0.693674	11461064	-0.698766
23728787	-0.663207	23804969	-0.698766	23608325	-0.696219	23666771	-0.698766	23857582	-0.683502	122045598	-0.585179	45193250	-0.691129	11506183	-0.698766	11546036	-0.691129	11420925	-0.673346	11461066	-0.698766
23728793	-0.698766	23804971	-0.698766	23608341	-0.680961	23666776	-0.698766	23857589	-0.698766	122045651	-0.693674	45193269	-0.698766	11506196	-0.698766	11546063	-0.698766	11420927	-0.698766	11461075	-0.698766
23728814	-0.698766	23804980	-0.680961	23608421	1.48448	23666826	1.2427	23857619	-0.686043	122045698	-0.698766	45193316	0.308712	11506210	-0.698766	11546067	-0.620296	11420943	-0.696219	11461104	-0.698766
23728828	-0.696219	23804991	-0.698766	23608431	-0.698766	23666848	-0.698766	23857620	-0.696219	122045702	-0.698766	45193345	-0.698766	11506211	2.46333	11546070	-0.434496	11420958	-0.126001	11461151	-0.698766
23728841	-0.698766	23805000	-0.678422	23608483	-0.698766	23666857	-0.678422	23857631	-0.698766	122045755	-0.698766	45193427	-0.698766	11506259	-0.66574	11546072	-0.590183	11420988	-0.698766	11461154	-0.630366
23728846	-0.698766	23805025	-0.693674	23608563	-0.663207	23666913	-0.698766	23857700	-0.698766	122045766	-0.698766	45193428	-0.688586	11506281	1.53669	11546074	-0.658143	11421002	-0.696219	11461161	-0.698766
23728847	1.65655	23805049	-0.698766	23608576	-0.698766	23666919	-0.268614	23857702	-0.698766	122045777	-0.698766	45193431	-0.688586	11506287	-0.67081	11546080	-0.627847	11421029	-0.693674	11461178	-0.698766
23728873	2.30325	23805050	-0.693674	23608655	-0.696219	23666934	1.03396	23857736	-0.698766	122045785	-0.587681	45193466	-0.698766	11506288	-0.602713	11546085	-0.693674	11421030	-0.696219	11461223	-0.590183
23728942	-0.696219	23805053	-0.698766	23608668	-0.698766	23666935	-0.693674	23857741	-0.658143	122045824	-0.698766	45193471	-0.698766	11506289	-0.698766	11546120	-0.696219	11421035	-0.696219	11461272	-0.660674
23728954	-0.693674	23805057	-0.686043	23608686	-0.698766	23666951	-0.562709	23857799	-0.696219	122045877	-0.698766	45193496	-0.698766	11506316	-0.698766	11546121	-0.605221	11421038	-0.696219	11461292	1.65915
23728958	-0.696219	23805061	-0.696219	23608691	-0.650555	23667015	-0.57019	23857836	-0.612754	122045883	-0.344942	45193518	-0.698766	11506321	-0.632886	11546123	-0.698766	11421064	-0.653084	11461301	-0.698766
23728967	-0.698766	23805086	-0.698766	23608797	-0.663207	23667058	-0.693674	23857848	-0.698766	122045909	-0.698766	45193536	-0.693674	11506334	-0.658143	11546128	-0.683502	11421067	-0.698766	11461302	-0.688586
23728971	-0.673346	23805105	-0.693674	23608821	-0.693674	23667074	-0.698766	23857918	-0.696219	122045910	-0.466291	45193538	-0.698766	11506336	-0.668274	11546151	-0.696219	11421068	-0.698766	11461337	-0.691129
23728979	1.46437	23805112	-0.698766	23608833	-0.698766	23667088	-0.663207	23857975	-0.698766	122045943	1.26963	45193588	-0.686043	11506343	-0.698766	11546176	-0.686043	11421086	-0.592687	11461346	-0.698766
23728980	2.31711	23805122	-0.663207	23608868	-0.688586	23667100	-0.698766	23857982	2.40208	122045946	-0.693674	45193589	-0.698766	11506347	2.44153	11546192	2.0412	11421168	-0.698766	11461347	-0.698766
23728981	-0.625329	23805137	-0.698766	23608871	-0.698766	23667128	-0.698766	23857996	-0.698766	122045947	-0.698766	45193648	-0.698766	11506350	-0.228489	11546194	-0.678422	11421174	-0.675883	11461357	-0.698766
23728986	2.36064	23805139	-0.617781	23608877	-0.683502	23667161	-0.696219	23858015	-0.698766	122045956	-0.698766	45193654	-0.698766	11506352	-0.488404	11546198	-0.698766	11421229	-0.698766	11461358	-0.698766
23729020	-0.693674	23805165	-0.698766	23608878	-0.691129	23667178	-0.698766	23858031	-0.698766	122046049	-0.688586	45193672	-0.691129	11506364	-0.686043	11546209	-0.693674	11421273	-0.698766	11461360	-0.698766
23729022	-0.617781	23805190	-0.698766	23608893	-0.632886	23667227	-0.696219	23858074	-0.698766	122046091	-0.660674	45193679	-0.698766	11506369	-0.696219	11546235	-0.698766	11421335	-0.696219	11461367	-0.698766
23729078	-0.675883	23805205	-0.625329	23608894	-0.698766	23667254	-0.0709282	23858105	-0.696219	122046099	1.26963	45193728	-0.612754	11506388	-0.67081	11546242	-0.678422	11421339	-0.275726	11461399	-0.691129
23729134	1.46437	23805225	-0.698766	23608924	-0.693674	23667259	-0.691129	23858106	-0.602713	122046102	-0.0938038	45193749	-0.698766	11506398	-0.653084	11546248	-0.693674	11421353	-0.680961	11461414	-0.698766
23729147	-0.693674	23805273	-0.688586	23608980	2.45447	23667286	-0.696219	23858149	-0.698766	122046103	-0.698766	45193758	0.22364	11506399	1.61305	11546249	-0.698766	11421372	-0.686043	11461417	-0.648028
23729178	-0.698766	23805302	-0.518016	23608997	-0.683502	23667326	-0.698766	23858200	-0.698766	122046115	0.238645	45193764	-0.696219	11506400	-0.678422	11546275	-0.698766	11421387	-0.698766	11461426	-0.698766
23729184	-0.698766	23805327	-0.698766	23609084	-0.698766	23667333	-0.698766	23858216	-0.625329	122046142	-0.698766	45193782	-0.620296	11506427	-0.332947	11546288	-0.698766	11421467	-0.696219	11461484	-0.698766
23729202	-0.698766	23805331	-0.683502	23609104	-0.696219	23667351	-0.698766	23858217	-0.698766	122046143	1.2649	45193783	-0.696219	11506448	-0.693674	11546299	-0.698766	11421513	-0.688586	11461486	-0.675883
23729211	-0.696219	23805333	-0.612754	23609125	-0.696219	23667362	-0.698766	23858226	-0.698766	122046148	1.26805	45193786	-0.698766	11506470	-0.648028	11546302	-0.698766	11421522	0.46789	11461490	-0.675883
23729227	-0.698766	23805378	-0.698766	23609129	-0.668274	23667400	-0.688586	23858232	-0.693674	122046178	-0.696219	45193800	-0.575182	11506471	-0.655613	11546306	-0.698766	11421532	-0.698766	11461496	-0.698766
23729239	-0.691129	23805475	-0.688586	23609141	-0.698766	23667405	-0.698766	23858241	-0.698766	122046230	-0.698766	45193840	-0.698766	11506472	-0.648028	11546308	-0.610242	11421555	-0.698766	11461505	-0.698766
23729265	-0.675883	23805486	-0.698766	23609166	-0.693674	23667433	-0.660674	23858252	-0.693674	122046236	0.50222	45193850	-0.698766	11506473	2.42689	11546314	1.43528	11421556	-0.698766	11461507	-0.696219
23729273	-0.698766	23805500	-0.693674	23609215	-0.698766	23667447	-0.698766	23858261	-0.698766	122046244	-0.696219	45193877	-0.698766	11506480	-0.698766	11546315	-0.698766	11421599	-0.698766	11461519	-0.668274
23729281	-0.655613	23805520	1.30093	23609301	1.44988	23667491	-0.698766	23858262	-0.698766	122046270	-0.688586	45193882	-0.698766	11506487	-0.698766	11546319	-0.698766	11421621	-0.595192	11461520	-0.371421
23729282	-0.615267	23805532	-0.562709	23609329	-0.696219	23667499	-0.696219	23858264	-0.698766	122046292	-0.698766	45193887	-0.698766	11506514	-0.698766	11546337	-0.696219	11421638	-0.698766	11461521	-0.693674
23729302	-0.698766	23805548	2.03449	23609388	-0.691129	23667502	-0.565201	23858311	-0.698766	122046325	0.659826	45193902	-0.698766	11506526	-0.698766	11546361	-0.683502	11421697	-0.698766	11461523	-0.696219
23729309	-0.698766	23805568	-0.698766	23609422	-0.698766	23667510	-0.527919	23858319	-0.698766	122046329	-0.698766	45193910	-0.698766	11506529	-0.691129	11546376	-0.696219	11421720	-0.698766	11461526	-0.698766
23729318	-0.686043	23805569	-0.688586	23609462	1.44988	23667516	-0.622812	23858334	1.2712	122046371	0.980131	45193990	-0.63793	11506532	-0.696219	11546378	-0.678422	11421721	1.14532	11461531	-0.698766
23729319	-0.698766	23805583	-0.698766	23609477	-0.693674	23667542	-0.698766	23858350	-0.698766	122046405	-0.698766	45194009	-0.466291	11506570	-0.698766	11546395	-0.0800662	11421777	-0.698766	11461533	-0.696219
23729321	-0.698766	23805589	-0.698766	23609478	-0.698766	23667556	1.12373	23858353	-0.607731	122046413	-0.698766	45194014	-0.617781	11506582	-0.109877	11546441	-0.698766	11421789	-0.683502	11461535	-0.683502
23729327	-0.691129	23805592	-0.698766	23609508	-0.696219	23667586	-0.693674	23858355	-0.642977	122046529	-0.696219	45194019	-0.698766	11506583	2.2019	11546461	-0.686043	11421807	-0.698766	11461545	-0.696219
23729378	-0.653084	23805609	0.0173143	23609531	-0.698766	23667587	-0.698766	23858396	-0.698766	122046596	0.0329889	45194076	-0.680961	11506629	-0.698766	11546462	-0.698766	11421812	-0.698766	11461549	-0.642977
23729382	-0.693674	23805621	-0.698766	23609532	-0.698766	23667606	-0.557727	23858428	2.39435	122046668	-0.698766	45194118	-0.698766	11506640	-0.698766	11546468	-0.696219	11421864	-0.698766	11461553	-0.642977
23729387	-0.698766	23805658	-0.693674	23609546	-0.696219	23667608	-0.562709	23858456	-0.698766	122046675	-0.698766	45194172	-0.698766	11506656	-0.698766	11546478	-0.698766	11421892	-0.698766	11461580	-0.673346
23729389	-0.686043	23805659	-0.698766	23609625	-0.696219	23667617	-0.698766	23858500	-0.698766	122046690	-0.466291	45194187	-0.698766	11506666	-0.696219	11546482	-0.696219	11421907	-0.698766	11461582	-0.673346
23729396	-0.693674	23805671	-0.698766	23609645	-0.698766	23667657	1.41024	23858536	0.0105814	122046695	-0.698766	45194205	-0.698766	11506676	-0.696219	11546485	-0.696219	11421909	-0.691129	11461610	-0.698766
23729410	-0.602713	23805690	1.94277	23609664	-0.698766	23667668	-0.698766	23858614	1.81481	122046716	-0.698766	45194233	-0.693674	11506699	-0.698766	11546490	-0.691129	11422013	-0.698766	11461624	-0.698766
23729415	-0.698766	23805700	-0.688586	23609760	-0.698766	23667674	-0.610242	23858712	-0.698766	122046883	-0.698766	45194264	-0.698766	11506700	-0.221439	11546493	-0.691129	11422030	-0.660674	11461647	-0.655613
23729416	-0.696219	23805773	-0.678422	23609775	-0.698766	23667676	-0.698766	23858714	-0.668274	122046900	-0.698766	45194313	-0.686043	11506709	-0.698766	11546495	-0.675883	11422047	-0.205023	11461711	-0.63793
23729421	-0.698766	23805774	-0.696219	23609784	-0.698766	23667692	-0.693674	23858715	1.49162	122046915	-0.648028	45194317	-0.698766	11506710	-0.698766	11546519	-0.691129	11422119	-0.698766	11461718	-0.698766
23729426	-0.655613	23805779	-0.680961	23609798	-0.575182	23667709	-0.693674	23858721	-0.698766	122046922	-0.693674	45194325	-0.696219	11506722	-0.693674	11546546	-0.698766	11422132	-0.680961	11461740	-0.698766
23729458	-0.693674	23805796	-0.663207	23609840	-0.693674	23667725	-0.698766	23858753	-0.590183	122046951	-0.698766	45194328	-0.691129	11506723	-0.698766	11546552	-0.698766	11422139	-0.698766	11461741	-0.675883
23729486	1.53947	23805802	-0.500724	23609841	-0.698766	23667730	-0.675883	23858754	1.60099	122046953	-0.698766	45194329	-0.696219	11506784	-0.696219	11546553	-0.597698	11422146	-0.688586	11461783	-0.698766
23729492	-0.678422	23805807	-0.635408	23609852	-0.680961	23667777	-0.698766	23858757	1.63954	122047047	-0.696219	45194486	-0.565201	11506786	-0.691129	11546554	-0.698766	11422190	1.03568	11461785	-0.698766
23729493	-0.582678	23805824	-0.696219	23609872	-0.693674	23667779	-0.532877	23858764	-0.691129	122047060	-0.698766	45194508	-0.698766	11506821	-0.698766	11546559	-0.693674	11422197	-0.696219	11461786	-0.680961
23729500	1.54225	23805828	-0.693674	23609885	-0.675883	23667788	-0.698766	23858775	-0.686043	122047097	-0.698766	45194510	-0.683502	11506839	-0.698766	11546588	-0.698766	11422217	-0.698766	11461799	-0.698766
23729506	-0.688586	23805832	1.09862	23609887	-0.698766	23667794	-0.632886	23858819	-0.698766	122047130	0.238645	45194531	-0.698766	11506843	-0.683502	11546602	-0.696219	11422243	-0.658143	11461802	0.186992
23729513	-0.693674	23805842	-0.691129	23609901	-0.582678	23667795	-0.696219	23858836	-0.678422	122047145	-0.673346	45194550	-0.698766	11506845	-0.680961	11546619	-0.698766	11422254	-0.698766	11461822	-0.698766
23729514	1.5602	23805846	-0.698766	23609920	0.296055	23667831	-0.698766	23858838	-0.429619	122047146	-0.648028	45194552	-0.698766	11506852	-0.698766	11546620	-0.696219	11422292	-0.698766	11461829	-0.698766
23729521	-0.648028	23805858	-0.680961	23609930	-0.698766	23667832	-0.698766	23858872	-0.698766	122047175	-0.693674	45194562	-0.698766	11506865	-0.696219	11546684	-0.698766	11422342	-0.696219	11461836	0.449596
23729534	1.48162	23805901	-0.696219	23609937	-0.698766	23667854	-0.698766	23858893	-0.625329	122047209	2.17613	45194563	-0.691129	11506869	-0.698766	11546706	-0.698766	11422440	-0.696219	11461850	-0.698766
23729536	1.48162	23805918	-0.565201	23609953	-0.209708	23667865	0.540241	23858897	1.57526	122047272	-0.698766	45194571	-0.698766	11506883	-0.698766	11546734	-0.693674	11422460	-0.698766	11461897	-0.698766
23729542	-0.696219	23805936	-0.696219	23609992	-0.696219	23667886	-0.698766	23858984	2.34969	122047302	1.22672	45194586	-0.696219	11506890	-0.693674	11546749	-0.696219	11422474	-0.698766	11461910	-0.698766
23729554	1.86873	23805946	-0.645502	23610023	-0.696219	23667905	-0.698766	23859012	-0.698766	122047311	-0.691129	45194641	-0.698766	11506893	2.03642	11546764	-0.696219	11422545	-0.698766	11461913	-0.696219
23729555	2.44246	23805948	-0.698766	23610031	-0.696219	23667915	-0.696219	23859017	2.32587	122047346	2.4681	45194643	-0.622812	11506901	-0.698766	11546766	-0.698766	11422569	-0.698766	11461965	-0.698766
23729566	-0.688586	23805952	-0.686043	23610127	-0.698766	23667931	-0.693674	23859019	2.32587	122047542	-0.698766	45194650	-0.698766	11506905	-0.696219	11546802	-0.698766	11422573	-0.698766	11461973	-0.645502
23729568	-0.688586	23805953	0.167471	23610161	-0.698766	23667942	-0.688586	23859050	-0.686043	122047591	-0.693674	45194663	-0.698766	11506919	-0.683502	11546803	-0.600205	11422590	-0.698766	11461984	-0.696219
23729577	-0.698766	23805963	-0.668274	23610222	-0.686043	23667950	-0.698766	23859065	-0.696219	122047600	-0.698766	45194708	-0.693674	11506955	-0.698766	11546811	-0.668274	11422637	-0.688586	11461985	-0.537839
23729579	-0.698766	23805988	-0.663207	23610262	1.48305	23667957	-0.698766	23859082	-0.698766	122047613	-0.67081	45194729	-0.696219	11506979	-0.698766	11546813	-0.668274			11461989	1.57526
23729586	-0.691129	23805994	-0.696219	23610291	-0.675883	23667981	-0.673346	23859119	-0.698766	122047661	-0.698766	45194790	-0.364187	11507013	-0.698766	11546823	-0.696219			11462002	1.62104
23729602	-0.691129	23805997	-0.698766	23610333	-0.698766	23668003	-0.698766	23859122	-0.698766	122047675	-0.698766	45194808	-0.650555	11507030	-0.698766	11546834	-0.698766			11462046	-0.698766
23729666	-0.698766	23806008	1.38641	23610372	1.52271	23668015	-0.698766	23859144	-0.698766	122047682	-0.698766	45194820	-0.658143	11507031	-0.698766	11546835	-0.698766			11462063	-0.605221
23729670	-0.688586	23806012	-0.698766	23610374	-0.698766	23668019	-0.698766	23859158	-0.698766	122047735	2.16079	45194876	-0.680961	11507049	-0.580178	11546845	-0.698766			11462089	-0.693674
23729736	-0.698766	23806033	-0.698766	23610375	2.48783	23668020	-0.698766	23859185	-0.696219	122047737	-0.668274	45194880	-0.680961	11507074	2.02288	11546863	-0.696219			11462116	-0.698766
23729745	-0.698766	23806067	-0.698766	23610381	1.44842	23668029	-0.688586	23859186	-0.698766	122047769	-0.698766	45194891	-0.686043	11507087	-0.698766	11546866	-0.698766			11462122	-0.698766
23729756	-0.698766	23806098	-0.698766	23610432	-0.693674	23668032	-0.698766	23859210	-0.698766	122047771	-0.698766	45194903	-0.698766	11507115	-0.693674	11546874	-0.696219			11462147	-0.696219
23729757	-0.696219	23806120	-0.683502	23610524	-0.688586	23668042	-0.693674	23859269	-0.458938	122047774	-0.691129	45194964	-0.560217	11507117	-0.698766	11546875	-0.698766			11462168	-0.668274
23729758	-0.693674	23806135	-0.683502	23610542	-0.675883	23668074	-0.655613	23859270	-0.458938	122047775	-0.693674	45194973	-0.683502	11507118	-0.590183	11546876	-0.696219			11462188	-0.693674
23729767	-0.698766	23806173	-0.698766	23610543	-0.698766	23668075	-0.658143	23859271	-0.458938	122047780	-0.698766	45194974	-0.698766	11507149	-0.617781	11546884	-0.673346			11462203	-0.698766
23729792	-0.696219	23806183	1.93537	23610569	-0.698766	23668119	-0.698766	23859274	-0.449149	122047804	-0.691129	45194981	-0.696219	11507160	-0.698766	11546894	-0.698766			11462231	-0.680961
23729793	-0.696219	23806210	-0.686043	23610570	-0.67081	23668123	-0.698766	23859319	1.44842	122047806	-0.645502	45194982	-0.696219	11507184	-0.693674	11546897	-0.698766			11462236	-0.698766
23729817	-0.698766	23806211	-0.686043	23610617	-0.696219	23668134	-0.698766	23859334	-0.698766	122047816	-0.688586	45195053	-0.698766	11507204	-0.698766	11546899	-0.698766			11462247	-0.678422
23729855	-0.698766	23806228	-0.693674	23610620	-0.688586	23668139	-0.698766	23859338	-0.693674	122047822	1.24906	45195056	-0.698766	11507205	-0.622812	11546918	-0.696219			11462251	-0.698766
23729865	-0.698766	23806244	-0.698766	23610641	-0.698766	23668176	-0.693674	23859343	-0.696219	122047851	-0.686043	45195073	-0.698766	11507206	-0.698766	11546945	-0.698766			11462271	-0.673346
23729893	-0.696219	23806271	-0.688586	23610759	-0.696219	23668241	-0.698766	23859392	-0.698766	122047876	0.15659	45195096	2.08039	11507210	-0.696219	11546982	-0.691129			11462275	1.51428
23729907	-0.595192	23806275	-0.683502	23610825	-0.698766	23668242	-0.698766	23859416	-0.287599	122047899	-0.463839	45195111	2.17772	11507215	-0.585179	11546987	0.43531			11462294	-0.605221
23729917	-0.680961	23806295	1.73653	23610831	-0.693674	23668249	-0.691129	23859422	-0.610242	122047907	1.26174	45195119	2.17772	11507217	-0.683502	11546990	0.43531			11462297	-0.691129
23729922	-0.698766	23806299	-0.698766	23610836	-0.597698	23668254	-0.698766	23859440	-0.407726	122047911	-0.693674	45195136	-0.552749	11507227	0.340194	11546993	-0.698766			11462360	-0.698766
23729939	-0.693674	23806313	-0.698766	23610841	1.44988	23668294	-0.266246	23859534	-0.673346	122047915	-0.693674	45195167	-0.698766	11507243	-0.698766	11547022	-0.698766			11462388	-0.663207
23729940	-0.658143	23806344	-0.696219	23610847	-0.673346	23668306	-0.696219	23859535	-0.698766	122048060	2.3394	45195194	-0.691129	11507245	-0.698766	11547031	-0.696219			11462406	-0.590183
23730010	-0.696219	23806361	-0.612754	23610870	-0.640453	23668315	-0.688586	23859569	-0.698766	122048131	-0.693674	45195250	-0.698766	11507246	-0.698766	11547039	-0.693674			11462418	-0.698766
23730024	-0.698766	23806374	-0.698766	23610881	2.48834	23668358	-0.696219	23859577	-0.698766	122048164	-0.686043	45195255	-0.696219	11507266	-0.698766	11547089	-0.67081			11462425	-0.698766
23730039	-0.696219	23806380	-0.698766	23610886	-0.698766	23668377	-0.698766	23859605	-0.696219	122048191	-0.696219	45195306	-0.698766	11507267	2.47535	11547101	-0.696219			11462533	-0.698766
23730138	-0.691129	23806442	-0.691129	23610913	-0.698766	23668412	-0.698766	23859644	-0.693674	122048248	-0.693674	45195393	-0.696219	11507286	-0.693674	11547103	-0.698766			11462570	-0.693674
23730150	-0.698766	23806444	-0.698766	23611003	-0.691129	23668463	-0.698766	23859660	-0.658143	122048255	-0.693674	45195406	-0.650555	11507306	-0.698766	11547113	-0.698766			11462589	-0.698766
23730168	-0.698766	23806466	-0.691129	23611048	-0.698766	23668494	-0.266246	23859679	-0.698766	122048332	-0.552749	45195456	-0.693674	11507309	-0.683502	11547136	-0.696219			11462603	-0.693674
23730169	-0.698766	23806468	-0.691129	23611165	-0.691129	23668531	-0.678422	23859697	-0.698766	122048391	-0.698766	45195459	-0.696219	11507310	-0.698766	11547182	-0.693674			11462629	-0.696219
23730178	-0.698766	23806475	-0.698766	23611209	-0.419879	23668546	-0.266246	23859718	-0.696219	122048394	-0.244976	45195519	-0.693674	11507312	-0.698766	11547184	-0.693674			11462638	-0.57768
23730182	-0.688586	23806490	-0.698766	23611223	-0.696219	23668576	-0.698766	23859753	2.48809	122048400	-0.698766	45195526	-0.696219	11507313	-0.698766	11547188	-0.698766			11462643	-0.698766
23730190	-0.698766	23806520	-0.696219	23611266	-0.696219	23668598	-0.698766	23859770	-0.698766	122048407	-0.698766	45195529	-0.650555	11507321	0.358973	11547196	-0.688586			11462662	-0.675883
23730233	-0.648028	23806533	-0.612754	23611294	-0.691129	23668629	-0.691129	23859785	-0.693674	122048481	-0.698766	45195592	-0.688586	11507414	-0.698766	11547207	-0.693674			11462670	-0.688586
23730240	-0.698766	23806536	1.98413	23611298	-0.698766	23668630	-0.698766	23859791	-0.698766	122048522	-0.688586	45195593	-0.696219	11507418	-0.698766	11547215	-0.696219			11462702	-0.693674
23730280	-0.698766	23806597	-0.698766	23611333	-0.696219	23668647	-0.698766	23859838	-0.678422	122048546	-0.696219	45195604	-0.691129	11507438	-0.686043	11547218	-0.66574			11462704	-0.668274
23730298	-0.696219	23806598	-0.67081	23611334	-0.680961	23668681	-0.266246	23859865	-0.698766	122048603	-0.696219	45195619	-0.675883	11507439	-0.698766	11547257	-0.436935			11462734	-0.698766
23730304	-0.698766	23806615	-0.698766	23611359	1.44988	23668713	-0.698766	23859887	-0.691129	122048644	0.469917	45195692	-0.698766	11507469	-0.691129	11547288	-0.693674			11462799	-0.698766
23730307	-0.698766	23806616	-0.698766	23611375	-0.655613	23668722	-0.698766	23859903	-0.696219	122048733	-0.696219	45195694	-0.388335	11507470	-0.698766	11547290	-0.698766			11462805	-0.698766
23730336	2.3014	23806625	-0.696219	23611377	-0.698766	23668729	-0.696219	23859906	1.96158	122048734	-0.696219	45195716	-0.698766	11507528	-0.698766	11547292	-0.698766			11462845	-0.698766
23730358	-0.698766	23806638	-0.57019	23611403	-0.696219	23668760	-0.691129	23859921	-0.698766	122048815	-0.698766	45195727	-0.698766	11507545	-0.653084	11547300	-0.698766			11462850	-0.698766
23730414	-0.316197	23806643	1.81481	23611409	1.35776	23668767	-0.698766	23859969	-0.698766	122048871	-0.696219	45195843	-0.693674	11507567	-0.698766	11547301	-0.693674			11462900	-0.698766
23730422	-0.585179	23806749	-0.698766	23611439	-0.567695	23668772	-0.696219	23859987	-0.696219	122048892	-0.696219	45195845	-0.696219	11507575	-0.696219	11547309	-0.595192			11462901	-0.683502
23730450	-0.693674	23806774	-0.698766	23611453	-0.698766	23668788	-0.263878	23859996	-0.698766	122048904	-0.696219	45195916	-0.650555	11507578	-0.696219	11547312	-0.696219			11462925	-0.698766
23730479	2.37115	23806775	-0.668274	23611470	-0.698766	23668827	-0.607731	23860017	-0.698766	122048980	-0.693674	45195940	-0.693674	11507593	-0.698766	11547324	-0.698766			11462946	-0.696219
23730568	-0.698766	23806785	-0.698766	23611501	-0.696219	23668829	-0.696219	23860023	-0.620296	122048986	-0.678422	45195977	-0.510599	11507606	-0.696219	11547333	-0.693674			11462947	-0.698766
23730625	-0.683502	23806795	-0.698766	23611575	-0.678422	23668830	-0.660674	23860027	-0.698766	122048998	-0.683502	45195996	1.89979	11507607	-0.698766	11547334	-0.698766			11463005	-0.698766
23730658	-0.696219	23806896	-0.696219	23611596	-0.698766	23668848	-0.698766	23860044	-0.693674	122049007	-0.698766	45196061	-0.698766	11507651	-0.698766	11547338	-0.691129			11463014	-0.683502
23730660	-0.688586	23806901	-0.698766	23611604	-0.698766	23668859	-0.693674	23860077	-0.698766	122049118	-0.698766	45196070	-0.686043	11507658	-0.696219	11547353	-0.698766			11463041	-0.698766
23730670	-0.622812	23806902	-0.691129	23611605	-0.693674	23668884	-0.691129	23860103	-0.698766	122049157	-0.627847	45196097	-0.693674	11507713	-0.693674	11547400	-0.698766			11463055	-0.698766
23730675	-0.696219	23806909	-0.698766	23611611	-0.698766	23668963	-0.658143	23860113	-0.691129	122049181	-0.485943	45196122	-0.698766	11507715	-0.696219	11547493	1.40282			11463067	-0.683502
23730731	-0.696219	23806918	-0.698766	23611626	-0.417446	23668965	-0.680961	23860115	-0.698766	122049271	-0.696219	45196136	-0.485943	11507716	-0.693674	11547497	-0.698766			11463100	-0.698766
23730764	-0.688586	23806929	2.48691	23611627	-0.698766	23668971	-0.698766	23860123	-0.698766	122049343	-0.698766	45196142	-0.696219	11507752	-0.698766	11547512	-0.530398			11463155	-0.67081
23730794	-0.696219	23806943	-0.683502	23611647	-0.686043	23668979	-0.698766	23860154	-0.698766	122049375	-0.698766	45196173	-0.693674	11507808	-0.567695	11547532	0.98888			11463160	-0.698766
23730806	-0.698766	23806948	-0.693674	23611691	-0.698766	23668996	-0.693674	23860155	-0.698766	122049480	-0.698766	45196197	-0.698766	11507834	-0.605221	11547551	-0.597698			11463221	-0.592687
23730808	-0.688586	23806956	-0.567695	23611697	-0.693674	23669000	-0.696219	23860158	-0.693674	122049498	-0.698766	45196198	-0.698766	11507871	-0.698766	11547559	-0.696219			11463228	-0.698766
23730814	-0.696219	23806975	-0.698766	23611715	-0.698766	23669006	-0.67081	23860162	-0.668274	122049523	-0.698766	45196200	-0.686043	11507919	-0.698766	11547603	-0.698766			11463244	-0.582678
23730865	-0.698766	23806999	-0.653084	23611716	-0.698766	23669015	-0.525442	23860178	2.43479	122049541	-0.686043	45196204	-0.21909	11507923	-0.693674	11547619	-0.696219			11463246	-0.698766
23730867	-0.693674	23807000	-0.698766	23611736	-0.698766	23669020	-0.693674	23860202	-0.698766	122049614	-0.698766	45196205	-0.678422	11507928	-0.698766	11547624	-0.560217			11463283	-0.688586
23730882	-0.698766	23807016	-0.582678	23611738	-0.640453	23669044	-0.698766	23860220	-0.698766	122049686	-0.691129			11507992	-0.24026	11547644	-0.698766			11463292	-0.698766
23730905	-0.698766	23807017	-0.696219	23611789	1.48162	23669045	-0.696219	23860221	-0.698766	122049709	-0.696219			11508005	-0.615267	11547645	-0.698766			11463315	-0.698766
23730973	-0.698766	23807018	-0.560217	23611790	-0.698766	23669086	-0.585179	23860223	-0.696219	122049712	-0.693674			11508036	0.751263	11547649	-0.432057			11463322	-0.466291
23731002	-0.698766	23807028	1.19447	23611831	-0.698766	23669115	-0.356963	23860235	-0.698766	122049725	-0.698766			11508040	-0.698766	11547664	-0.698766			11463324	-0.698766
23731033	-0.607731	23807034	-0.698766	23611925	-0.698766	23669120	-0.698766	23860242	-0.698766	122049769	-0.696219			11508041	-0.696219	11547666	-0.698766			11463335	-0.587681
23731103	-0.698766	23807040	-0.698766	23611932	-0.693674	23669130	-0.698766	23860243	-0.693674	122049800	-0.696219			11508044	-0.698766	11547680	-0.698766			11463355	-0.663207
23731110	-0.51307	23807051	-0.645502	23611956	-0.693674	23669131	-0.698766	23860259	-0.650555	122049801	-0.698766			11508049	-0.691129	11547684	-0.698766			11463357	-0.698766
23731114	-0.698766	23807066	-0.696219	23612005	-0.680961	23669202	-0.698766	23860281	-0.698766	122049827	-0.698766			11508050	-0.698766	11547700	-0.698766
23731135	-0.698766	23807084	-0.698766	23612022	-0.678422	23669208	-0.660674	23860331	-0.698766	122049853	-0.696219			11508051	-0.698766	11547703	-0.698766
23731138	-0.693674	23807087	-0.698766	23612049	-0.698766	23669235	-0.698766	23860332	-0.693674	122049869	-0.698766			11508056	-0.691129	11547736	-0.490866
23731139	-0.698766	23807093	-0.515543	23612085	-0.683502	23669241	-0.698766	23860351	-0.698766	122049918	-0.698766			11508070	-0.696219	11547741	-0.698766
23731190	-0.698766	23807136	-0.617781	23612106	-0.678422	23669243	-0.698766			122049932	-0.693674			11508105	-0.698766	11547780	-0.683502
23731191	-0.650555	23807141	-0.696219	23612125	-0.693674	23669246	-0.698766			122049951	2.48577			11508162	-0.696219	11547794	-0.693674
23731204	-0.698766	23807148	-0.691129	23612131	-0.698766	23669288	-0.698766			122050047	-0.698766			11508171	-0.35937	11547846	1.17655
23731215	-0.688586	23807161	-0.691129	23612137	-0.640453	23669305	1.0167			122050145	-0.698766			11508207	-0.698766	11547878	-0.691129
23731227	-0.698766	23807162	-0.560217	23612182	-0.645502	23669354	-0.696219			122050152	-0.698766			11508265	-0.542805	11547881	-0.668274
23731229	-0.698766	23807165	-0.698766	23612254	-0.698766	23669363	-0.691129			122050206	-0.698766			11508286	-0.698766	11547893	-0.691129
23731235	-0.698766	23807167	-0.698766	23612278	-0.653084	23669406	-0.693674			122050217	-0.698766			11508315	-0.698766	11547894	-0.698766
23731251	-0.698766	23807170	-0.683502	23612297	-0.693674	23669407	-0.655613			122050272	-0.678422			11508332	-0.698766	11547903	-0.698766
23731259	-0.696219	23807172	-0.698766	23612305	1.47589	23669410	-0.698766			122050306	0.15005			11508351	-0.696219	11547954	-0.696219
23731287	-0.696219	23807224	-0.698766	23612473	-0.698766	23669411	-0.698766			122050421	-0.691129			11508357	-0.696219	11547968	-0.680961
23731308	-0.698766	23807241	-0.562709	23612489	-0.686043	23669415	-0.696219			122050430	-0.698766			11508406	-0.691129	11548017	-0.610242
23731326	-0.698766	23807243	-0.698766	23612560	-0.696219	23669421	-0.688586			122050443	-0.698766			11508409	-0.696219	11548019	-0.610242
23731344	-0.698766	23807252	-0.686043	23612619	-0.658143	23669451	-0.650555			122050472	1.01844			11508416	-0.698766	11548020	-0.696219
23731354	-0.696219	23807262	-0.698766	23612668	-0.693674	23669456	-0.691129			122050531	-0.24026			11508441	-0.686043	11548026	-0.680961
23731361	-0.696219	23807271	-0.696219	23612737	1.78401	23669475	-0.696219			122050537	-0.696219			11508462	-0.698766	11548054	-0.698766
23731367	-0.698766	23807298	-0.693674	23612759	-0.698766	23669488	-0.282846			122050623	0.247197			11508484	-0.615267	11548099	-0.542805
23731385	-0.247335	23807308	1.45133	23612791	1.50298	23669577	-0.698766			122050698	-0.698766					11548116	-0.560217
23731389	-0.691129	23807360	1.37138	23612839	-0.698766	23669584	-0.282846			122050750	-0.698766					11548147	-0.557727
23731412	1.16509	23807362	-0.693674	23612847	-0.678422	23669589	-0.693674			122050788	-0.655613					11548150	-0.610242
23731416	-0.693674			23612856	-0.698766	23669598	-0.282846			122050811	-0.698766					11548222	-0.698766
23731419	-0.696219			23612872	-0.698766	23669606	-0.698766			122050820	-0.698766					11548240	-0.698766
23731426	2.26251			23612946	-0.698766	23669619	-0.698766			122050853	-0.698766					11548241	-0.698766
23731438	-0.691129			23612957	-0.680961	23669630	2.48544			122050919	-0.698766					11548260	-0.696219
23731442	-0.698766			23612973	-0.683502	23669649	-0.696219			122050941	-0.696219					11548282	-0.698766
23731451	-0.698766			23612979	0.95903	23669663	1.13704			122050952	-0.683502					11548299	-0.698766
23731459	-0.693674			23613042	-0.640453	23669664	-0.698766			122050953	-0.686043					11548327	-0.658143
23731465	-0.691129			23613050	-0.602713	23669667	-0.698766			122050966	-0.698766					11548333	-0.675883
23731470	-0.693674			23613082	-0.698766					122050968	-0.466291					11548341	-0.696219
23731477	-0.691129			23613105	-0.590183					122051024	-0.650555					11548375	-0.696219
23731483	-0.696219			23613111	-0.698766					122051043	-0.680961					11548387	-0.693674
23731488	-0.691129			23613120	-0.680961					122051059	-0.698766					11548436	1.40282
23731494	1.10198			23613163	-0.698766					122051110	-0.696219					11548444	-0.698766
23731503	-0.698766			23613170	-0.698766					122051116	-0.696219					11548473	-0.696219
23731518	-0.698766			23613187	-0.698766					122051166	-0.698766					11548530	-0.691129
23731523	-0.688586			23613189	-0.698766					122051183	0.451633					11548612	-0.696219
23731524	-0.688586			23613223	-0.698766					122051266	-0.698766					11548625	1.44988
23731526	-0.696219			23613250	-0.663207					122051273	-0.696219					11548629	-0.366597
23731527	-0.686043			23613254	-0.688586					122051361	-0.698766					11548731	-0.691129
23731535	-0.698766			23613259	-0.698766					122051410	-0.698766					11548803	-0.698766
23731546	-0.698766			23613264	-0.683502					122051414	-0.655613					11548853	-0.698766
23731551	-0.698766			23613277	-0.698766					122051422	-0.698766					11548855	1.38641
23731560	1.11204			23613334	-0.698766					122051473	-0.10528					11548863	-0.696219
23731585	-0.632886			23613339	-0.683502					122051606	1.2187					11548877	-0.575182
23731589	2.32123			23613341	-0.691129					122051696	-0.698766					11548884	-0.698766
23731590	-0.698766			23613350	-0.691129					122051714	-0.698766					11548889	-0.660674
23731600	-0.696219			23613383	-0.698766					122051768	-0.698766					11548891	-0.698766
23731627	-0.449149			23613465	-0.698766					122051824	-0.698766					11548978	-0.678422
23731639	-0.630366			23613479	-0.696219					122051925	-0.688586					11548993	-0.550261
23731640	-0.605221			23613493	-0.698766					122051960	-0.696219					11549032	-0.698766
23731641	-0.693674			23613564	-0.688586					122052016	-0.698766					11549064	-0.617781
23731653	1.54086			23613583	-0.698766					122052039	-0.698766					11549074	-0.698766
23731664	-0.698766			23613637	-0.698766					122052045	-0.698766					11549076	-0.617781
23731665	2.07765			23613644	-0.698766					122052135	-0.698766					11549079	-0.648028
23731667	-0.691129			23613690	-0.658143					122052183	-0.673346					11549105	-0.698766
23731671	-0.698766			23613711	-0.698766					122052189	-0.698766					11549136	-0.693674
23731678	-0.597698			23613747	-0.622812					122052209	-0.698766					11549156	-0.137548
23731682	-0.698766			23613750	2.48774					122052221	-0.698766					11549172	-0.698766
23731704	-0.151438			23613782	-0.698766					122052235	-0.493329					11549184	-0.696219
23731706	-0.235549			23613798	-0.602713					122052237	-0.698766					11549192	-0.560217
23731719	1.99421			23613799	-0.691129					122052244	-0.696219					11549200	-0.698766
23731721	1.99421			23613829	-0.691129					122052268	-0.698766					11549210	-0.686043
23731735	-0.698766			23613830	-0.696219					122052313	-0.698766					11549247	-0.698766
23731751	-0.691129			23613833	-0.698766					122052354	0.471944					11549249	-0.698766
23731753	-0.680961			23613848	-0.585179					122052437	-0.473653					11549270	-0.693674
23731767	-0.696219			23613928	-0.485943					122052493	-0.698766					11549272	-0.696219
23731805	-0.635408			23613936	-0.693674					122052498	1.02016					11549344	-0.698766
23731806	-0.130616			23613938	-0.693674					122052537	-0.458938					11549370	-0.698766
23731819	-0.698766			23613939	-0.205023					122052554	-0.698766					11549373	-0.680961
23731824	-0.696219			23613994	-0.67081					122052567	-0.698766					11549382	-0.698766
				23614054	-0.698766					122052581	1.3909					11549393	-0.693674
				23614073	-0.698766					122052606	-0.693674					11549414	-0.698766
				23614087	-0.200342					122052613	-0.698766					11549421	-0.698766
				23614123	-0.635408					122052623	-0.696219					11549440	-0.610242
				23614176	-0.655613					122052624	0.15005					11549441	-0.610242
				23614214	-0.658143					122052759	0.0419234					11549445	-0.698766
				23614219	-0.696219					122052778	-0.698766					11549464	-0.686043
				23614244	-0.698766					122052791	-0.691129					11549476	-0.698766
				23614261	1.33489					122052792	-0.698766					11549484	-0.691129
				23614293	-0.698766					122052812	-0.698766					11549515	-0.696219
				23614301	-0.698766					122053045	-0.698766					11549534	-0.668274
				23614304	-0.605221					122053067	-0.698766					11549555	-0.607731
				23614337	-0.698766					122053068	-0.686043					11549577	-0.610242
				23614352	-0.698766					122053212	-0.693674					11549578	-0.698766
				23614400	-0.696219					122053249	0.950195					11549600	-0.698766
				23614446	-0.698766					122053266	1.20903					11549621	-0.698766
				23614498	-0.698766					122053273	-0.686043					11549633	-0.698766
				23614541	-0.693674					122053274	-0.698766					11549657	-0.698766
				23614570	-0.658143					122053280	0.482061					11549689	-0.696219
				23614577	-0.658143					122053299	-0.698766					11549699	-0.698766
				23614677	-0.698766					122053305	-0.698766					11549730	-0.691129
				23614690	-0.627847					122053343	-0.698766					11549752	-0.436935
				23614714	-0.698766					122053353	-0.698766					11549759	-0.698766
				23614737	-0.698766					122053396	-0.466291					11549873	-0.680961
				23614779	-0.696219					122053432	-0.698766					11549902	-0.698766
				23614783	-0.675883					122053438	1.2187					11549905	-0.696219
				23614792	-0.693674					122053447	-0.698766					11549933	-0.698766
				23614814	-0.698766					122053450	-0.698766					11549938	-0.698766
				23614827	-0.691129					122053478	-0.698766					11549945	-0.696219
				23614851	-0.686043					122053491	-0.698766					11549961	1.36382
				23614860	-0.698766					122053507	-0.698766					11549970	-0.686043
				23614879	-0.698766					122053532	-0.698766					11550017	-0.698766
				23614905	-0.698766					122053567	1.02016					11550024	-0.540321
				23614991	-0.500724					122053666	-0.132926					11550030	-0.485943
				23615015	-0.686043					122053683	-0.678422					11550061	-0.698766
				23615058	-0.686043					122053699	-0.696219					11550068	-0.696219
				23615095	-0.693674					122053715	2.35181					11550071	-0.535357
				23615111	-0.698766					122053718	-0.696219					11550094	-0.610242
				23615112	-0.655613					122053719	-0.698766					11550129	-0.698766
				23615150	-0.686043					122053722	-0.698766					11550140	-0.691129
				23615191	-0.275726					122053725	-0.698766					11550163	-0.698766
				23615228	-0.698766					122053730	-0.466291					11550197	-0.698766
				23615237	-0.683502					122053738	-0.698766					11550207	-0.698766
				23615255	-0.688586					122053756	-0.691129					11550218	-0.698766
				23615324	-0.683502					122053793	-0.698766					11550230	-0.668274
				23615332	-0.698766					122053804	-0.698766					11550282	-0.698766
				23615396	-0.696219					122053839	-0.698766					11550293	-0.668274
				23615414	-0.698766					122053857	-0.698766					11550296	1.36382
				23615473	-0.698766					122053941	1.2187					11550305	-0.698766
				23615578	-0.698766					122054003	-0.698766					11550306	-0.436935
				23615593	-0.698766					122054052	-0.698766					11550328	-0.696219
				23615611	-0.698766					122054082	-0.698766					11550361	-0.285222
				23615625	-0.698766					122054095	-0.698766					11550363	-0.698766
				23615637	-0.698766					122054101	-0.698766					11550365	-0.436935
				23615680	-0.698766					122054142	-0.530398					11550373	-0.698766
				23615699	-0.658143					122054169	-0.698766					11550447	-0.698766
				23615720	-0.693674					122054222	-0.693674					11550450	-0.698766
				23615743	-0.698766					122054224	-0.680961					11550474	0.163122
				23615775	-0.698766					122054230	-0.698766					11550479	-0.686043
				23615816	-0.696219					122054252	-0.693674					11550507	-0.478566
				23615832	-0.696219					122054323	-0.693674					11550567	-0.488404
				23615843	-0.226138					122054331	-0.693674					11550576	-0.698766
				23615855	-0.696219					122054350	0.950195					11550582	-0.698766
				23615948	-0.698766					122054363	-0.678422					11550600	-0.686043
				23616024	-0.698766					122054433	-0.698766					11550602	-0.595192
				23616045	-0.693674					122054485	-0.525442					11550634	-0.696219
				23616082	-0.696219					122054530	-0.696219					11550653	-0.683502
				23616112	-0.698766					122054581	-0.698766					11550663	-0.635408
				23616117	-0.691129					122054582	-0.698766					11550713	-0.66574
				23616134	-0.698766					122054635	0.469917					11550788	-0.691129
				23616154	-0.698766					122054667	0.469917					11550845	-0.696219
				23616206	-0.202682					122054725	-0.473653					11550851	-0.680961
				23616228	-0.698766					122054761	-0.696219					11550869	-0.675883
				23616259	-0.698766					122054788	-0.698766					11550879	-0.698766
				23616266	-0.698766					122054801	-0.693674					11550899	-0.653084
				23616298	-0.698766					122054805	0.679068					11550905	-0.610242
				23616305	-0.490866					122054912	1.02189					11550936	-0.696219
				23616384	-0.698766					122054929	-0.693674					11550961	-0.698766
				23616469	1.36534					122054961	-0.693674					11550981	-0.610242
				23616492	1.36685					122055033	-0.698766					11550982	-0.698766
				23616583	-0.698766					122055052	-0.678422					11551012	-0.698766
				23616659	-0.698766					122055080	-0.698766					11551020	-0.698766
				23616661	-0.698766					122055084	-0.698766					11551042	-0.698766
				23616692	-0.696219					122055089	-0.698766					11551078	-0.696219
				23616703	-0.698766					122055107	-0.698766					11551108	-0.66574
				23616725	-0.668274					122055116	-0.698766					11551195	-0.590183
				23616727	-0.635408					122055176	-0.698766					11551201	-0.698766
				23616743	-0.698766					122055212	-0.698766					11551224	-0.698766
				23616763	-0.698766					122055249	-0.686043					11551243	-0.678422
				23616781	1.32875					122055256	-0.688586					11551258	-0.688586
				23616807	1.36534					122055463	-0.698766					11551296	-0.688586
				23616810	-0.698766					122055495	2.35339					11551306	-0.688586
				23616811	-0.696219					122055497	-0.693674					11551373	-0.698766
				23616829	-0.698766					122055636	-0.698766					11551429	-0.436935
				23616852	-0.698766					122055662	-0.693674					11551506	-0.698766
				23616861	-0.691129					122055680	-0.698766					11551513	-0.698766
				23616878	-0.696219					122055720	-0.698766					11551516	-0.688586
				23616879	-0.693674					122055851	-0.698766					11551586	-0.698766
				23616898	-0.698766					122055975	-0.683502					11551608	0.165297
				23616941	-0.658143					122055980	1.07666					11551613	-0.698766
				23616945	-0.693674					122055981	-0.242617					11551647	-0.683502
				23616977	-0.698766					122055997	-0.698766					11551705	-0.698766
				23617007	1.36534					122056152	-0.622812					11551716	-0.696219
				23617011	-0.693674					122056271	-0.698766					11551754	-0.696219
				23617053	-0.698766					122056277	-0.698766					11551769	-0.696219
				23617078	-0.490866					122056353	-0.698766					11551785	-0.698766
				23617094	-0.698766					122056432	2.34214					11551794	-0.698766
				23617106	-0.490866					122056450	-0.686043					11551805	-0.495793
				23617131	-0.698766					122056555	-0.698766					11551806	-0.698766
				23617133	-0.691129					122056561	-0.698766					11551814	-0.560217
				23617144	-0.673346					122056575	-0.698766					11551819	-0.693674
				23617145	-0.696219					122056642	-0.698766					11551866	0.073066
				23617147	-0.673346					122056655	-0.648028					11551902	-0.693674
				23617169	-0.688586					122056713	-0.698766					11551926	-0.698766
				23617203	1.33948					122056764	-0.696219					11551927	-0.696219
				23617234	-0.686043					122056778	-0.698766					11551928	-0.683502
				23617242	-0.696219					122056807	-0.693674					11551940	-0.686043
				23617251	-0.698766					122056863	1.02189					11551957	-0.698766
				23617254	-0.686043					122056915	-0.67081					11552037	-0.698766
				23617268	-0.696219					122057017	-0.698766					11552038	-0.635408
				23617300	-0.698766					122057029	0.15005					11552063	-0.696219
				23617302	-0.642977					122057033	-0.698766					11552077	-0.698766
				23617445	-0.680961					122057034	-0.696219					11552078	-0.688586
				23617502	-0.696219					122057083	-0.693674					11552081	-0.686043
				23617536	-0.698766					122057122	1.02189					11552082	-0.698766
				23617546	-0.696219					122057189	-0.698766					11552089	-0.696219
				23617592	-0.675883					122057280	-0.696219					11552096	-0.698766
				23617615	-0.688586					122057307	-0.675883					11552119	-0.698766
				23617624	-0.490866					122057310	-0.688586					11552120	0.98888
				23617645	-0.698766					122057346	0.457737					11552206	-0.560217
				23617660	-0.698766					122057394	-0.698766					11552222	-0.698766
				23617692	-0.698766					122057423	-0.698766					11552230	-0.696219
				23617713	-0.691129					122057478	-0.660674					11552254	-0.698766
				23617833	-0.688586					122057702	-0.698766					11552256	-0.698766
				23617845	-0.693674					122057761	1.22031					11552265	-0.683502
				23617868	-0.645502					122057832	-0.698766					11552281	-0.673346
				23617898	-0.567695					122057849	-0.696219					11552288	-0.698766
				23618001	-0.698766					122057850	-0.675883					11552303	-0.696219
				23618006	-0.688586					122057870	-0.650555					11552319	-0.635408
				23618054	-0.675883					122057873	1.2187					11552327	-0.698766
				23618098	-0.698766					122057908	-0.698766					11552340	-0.698766
				23618113	-0.688586					122057918	-0.693674					11552341	-0.698766
				23618165	-0.790352					122057927	-0.678422					11552362	-0.698766
				23618180	-0.693674					122057935	-0.698766					11552431	-0.696219
				23618188	-0.668274					122057949	-0.698766					11552434	-0.698766
				23618200	-0.698766					122057985	-0.698766					11552460	-0.698766
				23618204	-0.663207					122058117	-0.698766					11552509	-0.696219
				23618224	-0.696219					122058186	-0.698766					11552514	-0.683502
				23618265	-0.683502					122058196	-0.693674					11552551	-0.696219
				23618281	-0.691129					122058227	-0.698766					11552619	-0.485943
				23618286	-0.698766					122058264	-0.698766					11552620	-0.691129
				23618301	-0.698766					122058282	-0.696219					11552656	-0.698766
				23618305	-0.698766					122058307	-0.696219					11552662	-0.495793
				23618316	-0.698766					122058394	-0.658143					11552696	-0.696219
				23618362	-0.696219					122058409	-0.66574					11552742	0.44348
				23618384	-0.696219					122058452	-0.686043					11552744	-0.607731
				23618395	-0.107578					122058473	-0.698766					11552756	-0.698766
				23618412	-0.678422					122058501	-0.698766					11552771	-0.698766
				23618427	1.43235					122058516	-0.592687					11552785	-0.306648
				23618432	-0.698766					122058575	-0.698766					11552786	-0.66574
				23618434	-0.698766					122058593	-0.693674					11552794	-0.698766
				23618488	-0.417446					122058612	-0.698766					11552797	-0.289976
				23618525	-0.698766					122058613	-0.698766					11552935	-0.691129
				23618545	-0.693674					122058687	-0.698766					11552961	-0.693674
				23618547	-0.405299					122058690	-0.691129					11553009	-0.698766
				23618571	1.42795					122058703	-0.678422					11553013	-0.698766
				23618605	-0.66574					122058704	-0.696219					11553030	-0.698766
				23618610	-0.66574					122058705	-0.698766					11553039	1.66304
				23618630	-0.698766					122058731	-0.693674					11553046	-0.587681
				23618642	-0.698766					122058752	-0.696219					11553047	-0.698766
				23618652	1.55607					122058874	-0.673346					11553051	-0.680961
				23618656	1.43528					122058977	-0.698766					11553078	-0.436935
				23618711	-0.698766					122059041	-0.696219					11553079	-0.691129
				23618739	-0.683502					122059084	-0.686043					11553089	-0.696219
				23618809	-0.675883					122059086	-0.698766					11553131	0.373522
				23618853	-0.698766					122059220	-0.691129					11553134	-0.698766
				23618984	1.43528					122059245	-0.698766					11553135	-0.607731
				23619036	1.43528					122059326	-0.698766					11553161	-0.686043
				23619075	1.43382					122059448	-0.698766					11553198	-0.698766
										122059470	-0.693674					11553200	-0.698766
										122059527	-0.698766					11553201	-0.693674
										122059544	-0.660674					11553206	1.28533
										122059580	-0.680961					11553209	-0.698766
										122059592	-0.698766					11553243	-0.673346
										122059596	-0.698766					11553247	-0.698766
										122059597	-0.693674					11553255	-0.698766
										122059678	-0.698766					11553273	-0.696219
										122059685	-0.698766					11553323	-0.693674
										122059686	-0.693674					11553324	-0.693674
										122059688	1.19609					11553330	-0.698766
										122059689	-0.698766					11553368	1.29937
										122059740	-0.698766					11553394	-0.698766
										122059775	-0.398022					11553397	-0.620296
										122059791	2.48831					11553452	-0.698766
										122059851	-0.696219					11553459	-0.698766
										122059855	-0.696219					11553536	-0.683502
										122059859	-0.698766					11553572	-0.607731
										122059871	-0.696219					11553585	-0.698766
										122059888	-0.696219					11553588	-0.660674
										122059902	-0.696219					11553594	-0.680961
										122059949	2.34648					11553613	-0.683502
										122059995	-0.466291					11553617	-0.607731
										122060000	-0.693674					11553664	-0.696219
										122060053	-0.698766					11553695	-0.698766
										122060077	1.02189					11553700	-0.693674
										122060078	-0.693674					11553713	-0.680961
										122060274	0.191319					11553738	-0.698766
										122060340	-0.698766					11553767	-0.698766
										122060372	-0.698766					11553772	-0.698766
										122060390	-0.461388					11553780	-0.698766
										122060404	0.392155					11553819	-0.686043
										122060405	-0.696219					11553837	-0.655613
										122060408	-0.698766					11553875	-0.698766
										122060477	-0.67081					11553960	-0.698766
										122060486	-0.615267					11553985	-0.66574
										122060653	-0.696219					11553986	-0.696219
										122060816	1.79356					11554006	-0.698766
																11554009	-0.595192
																11554011	-0.635408
																11554113	-0.607731
																11554143	2.43741
																11554167	-0.698766
																11554188	-0.622812
																11554222	-0.696219
																11554239	-0.607731
																11554246	-0.51307
																11554252	-0.51307
																11554256	-0.51307
																11554278	-0.698766
																11554288	-0.473653
																11554297	-0.473653
																11554340	-0.696219
																11554347	-0.607731
																11554372	-0.698766
																11554419	-0.691129
																11554428	-0.698766
																11554443	-0.57019
																11554449	-0.698766
																11554456	-0.693674
																11554469	-0.696219
																11554502	1.57254
																11554505	-0.688586
																11554511	-0.650555
																11554525	-0.698766
																11554528	-0.698766
																11554574	-0.691129
																11554588	-0.688586
																11554621	-0.698766
																11554633	-0.698766
																11554672	-0.693674
																11554673	-0.693674
																11554687	-0.698766
																11554735	-0.696219
																11554762	-0.698766
																11554771	-0.688586
																11554888	0.721044
																11554900	-0.57019
																11554926	-0.698766
																11554949	-0.696219
																11554985	-0.550261
																11554989	-0.691129
																11554996	-0.688586
																11555011	0.98888
																11555022	-0.698766
																11555025	-0.698766
																11555037	-0.698766
																11555045	-0.640453
																11555046	-0.691129
																11555049	-0.410155
																11555063	-0.57019
																11555082	-0.698766
																11555089	-0.698766
																11555103	-0.698766
																11555112	-0.698766
																11555121	-0.675883
																11555185	-0.698766
																11555198	-0.395599
																11555208	-0.698766
																11555243	-0.698766
																11555327	-0.698766
																11555411	-0.698766
																11555428	-0.698766
																11555429	-0.607731
																11555454	-0.696219
																11555467	1.16509
																11555508	-0.607731
																11555512	-0.678422
																11555532	-0.688586
																11555540	-0.698766
																11555618	-0.395599
																11555637	-0.698766
																11555672	-0.595192
																11555684	-0.560217
																11555716	-0.698766
																11555725	-0.395599
																11555731	-0.607731
																11555799	-0.691129
																11555819	-0.436935
																11555837	-0.688586
																11555896	-0.696219
																11555897	-0.698766
																11555923	-0.696219
																11555931	-0.698766
																11555955	-0.698766
																11555976	-0.693674
																11555987	-0.696219
																11556022	-0.686043
																11556031	-0.686043
																11556102	-0.698766
																11556146	-0.542805
																11556226	-0.602713
																11556261	-0.575182
																11556262	-0.698766
																11556283	-0.698766
																11556336	-0.680961
																11556374	-0.696219
																11556382	-0.696219
																11556383	-0.698766
																11556410	-0.691129
																11556412	-0.698766
																11556434	-0.678422
																11556436	-0.696219
																11556455	-0.607731
																11556471	-0.698766
																11556498	-0.698766
																11556531	-0.696219
																11556537	-0.683502
																11556614	-0.600205
																11556650	-0.698766
																11556690	-0.698766
																11556692	-0.698766
																11556701	-0.698766
																11556755	-0.632886
																11556764	-0.673346
																11556768	-0.698766
																11556800	-0.607731
																11556821	0.119406
																11556860	-0.698766
																11556869	-0.698766
																11556874	-0.693674
																11556875	-0.57019
																11556878	-0.698766
																11556897	-0.698766
																11556898	-0.693674
																11556900	-0.698766
																11556902	-0.698766
																11556935	-0.354557
																11556942	-0.485943
																11556945	-0.698766
																11556948	-0.663207
																11556951	1.57254
																11556962	-0.439376
																11556963	-0.696219
																11556966	-0.698766
																11556972	-0.607731
																11556988	-0.410155
																11556997	-0.698766
																11557004	-0.607731
																11557035	-0.698766
																11557036	-0.698766
																11557046	-0.688586
																11557090	-0.698766
																11557093	-0.698766
																11557094	-0.542805
																11557106	-0.607731
																11557107	-0.627847
																11557128	-0.57019
																11557133	0.987132
																11557162	-0.693674
																11557163	-0.696219
																11557168	-0.698766
																11557222	-0.698766
																11557223	-0.607731
																11557259	0.987132
																11557273	-0.673346
																11557283	-0.698766
																11557285	-0.610242
																11557293	-0.688586
																11557313	-0.698766
																11557324	-0.698766
																11557331	-0.395599
																11557344	-0.698766
																11557377	-0.680961
																11557383	-0.698766
																11557419	-0.698766
																11557461	-0.680961
																11557481	-0.100686
																11557486	1.16509
																11557515	-0.698766
																11557521	-0.686043
																11557527	-0.698766
																11557536	0.98888
																11557548	-0.607731
																11557555	-0.698766
																11557564	-0.698766
																11557579	-0.693674
																11557616	-0.698766
																11557624	-0.698766
																11557659	1.24429
																11557669	-0.698766
																11557672	-0.648028
																11557813	-0.691129
																11557852	-0.698766
																11557872	-0.698766
																11557878	-0.673346
																11557912	-0.698766
																11557922	-0.698766
																11557923	-0.57019
																11557990	-0.696219
																11557993	-0.645502
																11558010	-0.698766
																11558022	0.43531
																11558045	-0.610242
																11558050	-0.698766
																11558074	-0.698766
																11558075	-0.592687
																11558078	-0.650555
																11558089	-0.691129
																11558108	-0.686043
																11558118	-0.395599
																11558144	-0.698766
																11558154	-0.696219
																11558165	-0.675883
																11558179	-0.698766
																11558215	-0.696219
																11558224	-0.698766
																11558242	-0.693674
																11558279	-0.691129
																11558318	-0.698766
																11558370	-0.67081
																11558414	-0.686043
																11558415	-0.610242
																11558456	-0.698766
																11558458	-0.698766
																11558493	-0.696219
																11558501	-0.693674
																11558502	-0.655613
																11558508	-0.407726
																11558519	-0.696219
																11558575	-0.57019
																11558617	-0.696219
																11558660	-0.696219
																11558675	-0.696219
																11558682	-0.439376
																11558688	-0.693674
																11558701	-0.680961
																11558713	-0.575182
																11558720	-0.698766
																11558725	-0.698766
																11558747	-0.66574
																11558761	-0.693674
																11558778	-0.683502
																11558779	-0.698766
																11558792	-0.698766
																11558801	-0.698766
																11558818	-0.698766
																11558829	-0.698766
																11558858	1.24111
																11558877	-0.463839
																11558886	-0.410155
																11558928	-0.698766
																11558931	-0.493329
																11558942	-0.698766
																11558948	-0.678422
																11559018	-0.663207
																11559079	-0.698766
																11559083	-0.698766
																11559096	-0.640453
																11559098	-0.620296
																11559153	-0.693674
																11559165	-0.696219
																11559171	-0.575182
																11559184	-0.655613
																11559221	-0.663207
																11559230	-0.410155
																11559231	2.25012
																11559241	2.24803
																11559243	2.37695
																11559259	-0.660674
																11559263	-0.683502
																11559275	-0.698766
																11559319	-0.698766
																11559329	-0.688586
																11559347	-0.698766
																11559407	-0.696219
																11559464	-0.698766
																11559508	-0.698766
																11559575	-0.698766
																11559599	-0.698766
																11559605	-0.696219
																11559625	-0.698766
																11559644	-0.698766
																11559672	-0.600205
																11559679	-0.587681
																11559681	-0.57019
																11559741	-0.555237
																11559750	-0.696219
																11559754	-0.698766
																11559845	-0.683502
																11559863	-0.698766
																11559866	-0.696219
																11559868	-0.698766
																11559921	-0.653084
																11559958	-0.698766
																11560012	1.56432
																11560014	-0.696219
																11560052	-0.698766
																11560081	-0.691129
																11560108	-0.696219
																11560112	-0.688586
																11560195	-0.698766
																11560226	-0.698766
																11560235	-0.698766
																11560240	-0.698766
																11560250	-0.696219
																11560265	-0.57019
																11560267	-0.698766
																11560288	-0.698766
																11560328	-0.680961
																11560338	-0.698766
																11560340	-0.605221
																11560436	-0.696219
																11560451	-0.693674
																11560458	-0.698766
																11560472	-0.550261
																11560493	-0.419879
																11560513	-0.698766
																11560542	-0.698766
																11560553	-0.686043
																11560573	-0.698766
																11560590	-0.627847
																11560611	-0.696219
																11560614	-0.698766
																11560622	-0.675883
																11560626	-0.635408
																11560660	-0.693674
																11560715	-0.698766
																11560742	-0.698766
																11560914	-0.698766
																11560962	-0.691129
																11561032	-0.693674
																11561039	1.51428
																11561086	-0.698766
																11561097	-0.693674
																11561110	-0.617781
																11561144	-0.696219
																11561150	-0.698766
																11561175	-0.673346
																11561176	1.61838
																11561231	-0.590183
																11561246	-0.696219
																11561297	-0.698766
																11561307	-0.698766
																11561308	-0.698766
																11561321	-0.698766
																11561357	1.1204
																11561397	0.230077
																11561411	-0.698766
																11561421	-0.698766
																11561452	1.06307
																11561453	-0.698766
																11561461	-0.698766
																11561511	-0.698766
																11561525	-0.698766
																11561526	-0.693674
																11561568	-0.668274
																11561585	-0.698766
																11561601	-0.698766
																11561602	-0.696219
																11561605	-0.698766
																11561607	-0.698766
																11561651	0.08414
																11561667	-0.698766
																11561676	-0.698766
																11561692	-0.698766
																11561694	-0.612754
																11561725	1.31179
																11561729	1.19122
																11561770	-0.632886
																11561825	-0.580178
																11561829	-0.680961
																11561843	0.277001
																11561848	-0.698766
																11561863	-0.696219
																11561865	-0.698766
																11561900	-0.696219
																11561908	-0.356963
																11561953	-0.683502
																11562003	0.106212
																11562013	-0.680961
																11562022	-0.698766
																11562044	-0.698766
																11562094	-0.680961
																11562117	-0.696219
																11562123	0.0951886
																11562162	-0.698766
																11562171	-0.67081
																11562178	-0.617781
																11562184	-0.696219
																11562249	-0.100686
																11562265	-0.698766
																11562336	-0.683502
																11562356	-0.698766
																11562425	-0.698766
																11562445	-0.698766
																11562449	-0.680961
																11562500	-0.698766
																11562525	-0.698766
																11562536	0.119406
																11562568	-0.698766
																11562569	-0.688586
																11562602	0.283361
																11562626	-0.698766
																11562631	-0.67081
																11562637	-0.691129
																11562721	-0.698766
																11562763	-0.696219
																11562800	0.0575196
																11562841	-0.698766
																11562843	-0.693674
																11562873	-0.698766
																11562874	-0.698766
																11562913	-0.698766
																11562922	-0.57019
																11562938	-0.595192
																11562946	-0.698766
																11562973	-0.698766
																11562986	-0.691129
																11563003	-0.683502
																11563008	-0.347344
																11563022	-0.680961
																11563040	-0.698766
																11563054	-0.698766
																11563058	-0.675883
																11563074	-0.698766
																11563141	-0.67081
																11563151	2.04975
																11563169	-0.67081
																11563171	-0.686043
																11563172	-0.675883
																11563209	-0.698766
																11563227	-0.663207
																11563269	-0.698766
																11563383	-0.678422
																11563388	-0.683502
																11563401	-0.698766
																11563465	-0.680961
																11563510	-0.686043
																11563536	-0.680961
																11563570	-0.696219
																11563593	-0.696219
																11563617	-0.522965
																11563620	-0.522965
																11563623	-0.698766
																11563663	-0.67081
																11563668	-0.698766
																11563669	-0.675883
																11563679	-0.698766
																11563686	-0.698766
																11563687	-0.693674
																11563770	-0.696219
																11563774	-0.698766
																11563783	-0.698766
																11563825	-0.698766
																11563835	-0.696219
																11563857	-0.698766
																11563867	-0.680961
																11563906	-0.698766
																11563928	-0.698766
																11563932	-0.691129
																11563934	-0.698766
																11563951	-0.698766
																11563955	-0.698766
																11563965	-0.698766
																11564008	-0.698766
																11564060	-0.698766
																11564065	-0.658143
																11564102	-0.698766
																11564123	-0.698766
																11564183	-0.696219
																11564257	-0.698766
																11564281	-0.537839
																11564290	-0.102983
																11564322	-0.698766
																11564347	-0.698766
																11564354	-0.698766
																11564381	-0.696219
																11564394	-0.683502
																11564407	-0.612754
																11564427	-0.698766
																11564464	-0.673346
																11564507	-0.698766
																11564511	1.31179
																11564537	-0.67081
																11564546	-0.698766
																11564576	-0.698766
																11564601	-0.696219
																11564602	-0.698766
																11564614	-0.696219
																11564617	-0.698766
																11564674	-0.698766
																11564697	-0.683502
																11564714	-0.698766
																11564724	-0.693674
																11564783	-0.698766
																11564785	-0.698766
																11564787	-0.233194
																11564788	-0.696219
																11564811	-0.693674
																11564812	0.279122
																11564819	-0.698766
																11564834	-0.698766
																11564843	-0.698766
																11564846	-0.698766
																11564857	-0.698766
																11564859	-0.698766
																11564868	-0.698766
																11564913	-0.691129
																11564932	-0.686043
																11564980	0.0619665
																11565011	-0.10528
																11565025	-0.698766
																11565081	0.860442
																11565085	0.860442
																11565096	-0.698766
																11565128	-0.693674
																11565143	-0.580178
																11565157	-0.698766
																11565158	-0.696219
																11565163	-0.693674
																11565227	-0.550261
																11565233	-0.698766
																11565259	-0.698766
																11565263	-0.226138
																11565265	-0.226138
																11565291	-0.698766
																11565361	-0.698766
																11565425	-0.698766
																11565439	-0.560217
																11565480	-0.691129
																11565494	-0.698766
																11565538	-0.698766
																11565581	-0.673346
																11565612	-0.696219
																11565615	-0.698766
																11565620	-0.693674
																11565649	-0.602713
																11565663	-0.691129
																11565689	-0.590183
																11565704	-0.698766
																11565714	-0.688586
																11565725	-0.693674
																11565736	-0.698766
																11565738	-0.698766
																11565742	-0.698766
																11565756	-0.683502
																11565797	-0.691129
																11565806	-0.693674
																11565819	-0.675883
																11565856	-0.696219
																11565888	-0.698766
																11565889	-0.537839
																11566005	-0.698766
																11566040	-0.698766
																11566125	-0.696219
																11566137	-0.696219
																11566141	-0.693674
																11566157	-0.698766
																11566159	-0.622812
																11566175	-0.698766
																11566195	-0.698766
																11566212	-0.696219
																11566213	-0.696219
																11566227	-0.347344
																11566238	-0.698766
																11566239	-0.698766
																11566266	-0.590183
																11566348	-0.226138
																11566391	-0.698766
																11566393	-0.698766
																11566409	-0.698766
																11566434	1.31179
																11566450	-0.642977
																11566451	-0.698766
																11566537	-0.698766
																11566573	-0.696219
																11566574	-0.696219
																11566575	-0.698766
																11566636	-0.698766
																11566703	-0.590183
																11566732	-0.698766
																11566739	-0.620296
																11566745	-0.693674
																11566749	-0.696219
																11566791	0.104009
																11566805	-0.698766
																11566814	-0.585179
																11566843	-0.698766
																11566853	-0.693674
																11566871	-0.696219
																11566880	-0.698766
																11566885	-0.696219
																11566893	-0.696219
																11566931	-0.698766
																11566938	-0.696219
																11566941	0.279122
																11566947	-0.691129
																11566987	-0.698766
																11567041	-0.592687
																11567042	-0.592687
																11567045	-0.592687
																11567069	-0.698766
																11567082	-0.698766
																11567116	-0.698766
																11567176	-0.698766
																11567191	-0.698766
																11567201	-0.66574
																11567211	-0.698766
																11567219	-0.693674
																11567225	-0.696219
																11567230	-0.698766
																11567327	-0.698766
																11567355	-0.680961
																11567369	-0.693674
																11567373	-0.698766
																11567392	0.279122
																11567401	-0.663207
																11567403	-0.698766
																11567444	-0.698766
																11567448	-0.698766
																11567452	-0.66574
																11567483	-0.698766
																11567534	-0.693674
																11567579	-0.698766
																11567610	-0.552749
																11567627	-0.693674
																11567628	-0.698766
																11567651	-0.696219
																11567659	-0.698766
																11567700	-0.522965
																11567705	-0.688586
																11567719	-0.698766
																11567754	-0.693674
																11567785	-0.693674
																11567788	-0.66574
																11567814	-0.698766
																11567818	-0.698766
																11567844	-0.696219
																11567869	-0.698766
																11567893	-0.698766
																11567900	-0.696219
																11567911	0.404531
																11567917	-0.693674
																11567928	-0.698766
																11567987	-0.683502
																11568036	-0.698766
																11568039	-0.590183
																11568068	-0.607731
																11568071	-0.693674
																11568079	-0.518016
																11568124	-0.698766
																11568126	-0.696219
																11568127	-0.696219
																11568130	-0.698766
																11568185	1.31334
																11568189	-0.668274
																11568191	0.279122
																11568208	-0.696219
																11568222	-0.696219
																11568286	-0.212052
																11568293	-0.683502
																11568353	-0.698766
																11568366	0.329725
																11568383	-0.582678
																11568390	-0.680961
																11568400	-0.698766
																11568409	-0.698766
																11568426	-0.693674
																11568429	0.119406
																11568433	0.169644
																11568439	-0.683502
																11568441	-0.698766
																11568449	-0.688586
																11568553	-0.698766
																11568578	-0.698766
																11568588	-0.698766
																11568650	-0.698766
																11568652	-0.698766
																11568653	-0.698766
																11568656	-0.686043
																11568678	-0.698766
																11568697	-0.680961
																11568698	-0.680961
																11568713	-0.698766
																11568727	-0.696219
																11568763	-0.696219
																11568773	-0.696219
																11568780	-0.696219
																11568786	-0.698766
																11568808	-0.698766
																11568817	-0.691129
																11568819	-0.686043
																11568821	-0.696219
																11568822	2.07122
																11568843	-0.698766
																11568856	0.279122
																11568902	-0.698766
																11568915	0.277001
																11568924	-0.696219
																11568991	-0.691129
																11569020	-0.693674
																11569029	-0.580178
																11569055	-0.691129
																11569086	-0.698766
																11569207	-0.590183
																11569225	-0.698766
																11569232	-0.698766
																11569242	-0.223788
																11569243	-0.693674
																11569275	-0.645502
																11569288	-0.698766
																11569290	-0.698766
																11569292	-0.698766
																11569301	-0.696219
																11569302	-0.698766
																11569397	-0.696219
																11569399	-0.698766
																11569416	-0.688586
																11569443	-0.693674
																11569452	0.279122
																11569482	-0.696219
																11569486	-0.698766
																11569492	0.279122
																11569524	-0.698766
																11569526	-0.698766
																11569536	-0.673346
																11569542	-0.698766
																11569581	-0.617781
																11569592	-0.698766
																11569597	-0.698766
																11569624	-0.660674
																11569631	-0.698766
																11569637	-0.691129
																11569638	0.221493
																11569658	-0.696219
																11569659	-0.698766
																11569660	0.279122
																11569669	0.279122
																11569712	-0.680961
																11569722	-0.663207
																11569726	-0.698766
																11569736	-0.696219
																11569771	-0.696219
																11569806	-0.582678
																11569831	-0.691129
																11569874	-0.693674
																11569921	-0.698766
																11569939	-0.698766
																11569977	-0.691129
																11570020	-0.698766
																11570024	-0.698766
																11570033	-0.696219
																11570072	1.30093
																11570124	-0.696219
																11570129	-0.691129
																11570137	-0.655613
																11570194	-0.683502
																11570214	-0.698766
																11570230	-0.550261
																11570238	-0.642977
																11570241	-0.698766
																11570247	-0.696219
																11570248	-0.344942
																11570264	-0.696219
																11570273	-0.696219
																11570387	-0.57019
																11570396	-0.698766
																11570397	-0.688586
																11570398	0.121601
																11570414	-0.686043
																11570415	-0.698766
																11570425	-0.688586
																11570428	-0.645502
																11570465	-0.698766
																11570498	-0.698766
																11570545	-0.698766
																11570552	-0.678422
																11570553	-0.675883
																11570573	-0.698766
																11570595	-0.698766
																11570616	-0.57019
																11570627	-0.698766
																11570629	-0.698766
																11570671	-0.691129
																11570715	-0.683502
																11570770	-0.698766
																11570828	-0.698766
																11570869	1.31334
																11570917	-0.698766
																11570940	-0.698766
																11570975	-0.680961
																11570981	-0.698766
																11570988	-0.527919
																11571001	-0.696219
																11571016	-0.698766
																11571025	-0.344942
																11571047	-0.691129
																11571062	-0.592687
																11571071	-0.696219
																11571123	-0.691129
																11571130	-0.620296
																11571136	-0.698766
																11571174	-0.698766
																11571206	-0.698766
																11571268	-0.698766
																11571326	-0.344942
																11571345	0.0664094
																11571346	-0.698766
																11571347	-0.698766
																11571357	-0.698766
																11571358	0.279122
																11571396	-0.658143
																11571398	-0.658143
																11571422	-0.696219
																11571423	-0.648028
																11571463	-0.696219
																11571507	-0.698766
																11571517	-0.696219
																11571531	-0.698766
																11571536	-0.698766
																11571544	0.0597436
																11571555	-0.698766
																11571615	-0.67081
																11571619	-0.698766
																11571621	-0.698766
																11571625	-0.698766
																11571631	-0.632886
																11571645	-0.66574
																11571647	-0.658143
																11571665	-0.696219
																11571671	-0.567695
																11571685	-0.691129
																11571708	-0.696219
																11571721	-0.696219
																11571732	-0.605221
																11571737	0.169644
																11571875	-0.688586
																11571940	-0.691129
																11571957	-0.696219
																11571997	-0.297115
																11572019	0.169644
																11572020	-0.691129
																11572058	2.39479
																11572099	0.219344
																11572105	-0.686043
																11572143	-0.698766
																11572147	-0.223788
																11572222	-0.698766
																11572230	-0.693674
																11572235	-0.698766
																11572267	-0.698766
																11572357	-0.698766
																11572409	-0.653084
																11572410	-0.698766
																11572454	1.31334
																11572455	-0.698766
																11572479	-0.678422
																11572487	-0.698766
																11572530	-0.691129
																11572567	1.2649
																11572603	-0.696219
																11572605	-0.698766
																11572613	-0.698766
																11572615	-0.688586
																11572672	-0.691129
																11572720	-0.223788
																11572732	-0.698766
																11572756	0.0664094
																11572766	-0.100686
																11572774	-0.698766
																11572822	-0.698766
																11572884	0.0664094
																11572885	-0.696219
																11572914	-0.688586
																11572932	-0.675883
																11572933	-0.698766
																11572969	-0.691129
																11573000	-0.680961
																11573015	-0.663207
																11573019	-0.673346
																11573054	-0.696219
																11573131	-0.698766
																11573136	-0.688586
																11573170	-0.693674
																11573171	-0.698766
																11573177	-0.696219
																11573185	-0.696219
																11573211	-0.698766
																11573254	-0.698766
																11573260	-0.223788
																11573337	1.31488
																11573371	-0.655613
																11573390	-0.663207
																11573473	-0.698766
																11573496	-0.698766
																11573519	-0.696219
																11573520	-0.688586
																11573527	-0.698766
																11573546	-0.640453
																11573564	-0.698766
																11573568	-0.698766
																11573574	-0.698766
																11573586	-0.698766
																11573611	-0.698766
																11573635	-0.696219
																11573650	-0.698766
																11573667	-0.693674
																11573678	-0.698766
																11573708	-0.688586
																11573716	-0.585179
																11573719	-0.691129
																11573732	-0.698766
																11573759	-0.698766
																11573776	-0.698766
																11573781	-0.678422
																11573800	0.274879
																11573806	-0.698766
																11573810	-0.698766
																11573828	-0.698766
																11573852	-0.683502
																11573886	-0.221439
																11573893	-0.698766
																11573965	-0.698766
																11573982	-0.698766
																11573996	-0.223788
																11574068	-0.698766
																11574123	-0.698766
																11574137	-0.698766
																11574176	-0.691129
																11574177	-0.698766
																11574208	-0.691129
																11574209	0.315026
																11574222	-0.698766
																11574233	-0.696219
																11574236	-0.592687
																11574245	-0.698766
																11574374	-0.582678
																11574398	-0.698766
																11574424	0.0552946
																11574510	1.08851
																11574542	-0.582678
																11574576	-0.696219
																11574619	-0.653084
																11574632	-0.698766
																11574657	-0.688586
																11574698	-0.698766
																11574707	-0.625329
																11574728	0.48004
																11574738	-0.698766
																11574744	-0.66574
																11574751	-0.221439
																11574774	-0.688586
																11574853	-0.680961
																11574913	-0.698766
																11574932	0.279122
																11574974	-0.686043
																11574977	0.48004
																11574981	-0.686043
																11574987	-0.686043
																11574998	-0.686043
																11575057	-0.582678
																11575090	-0.698766
																11575134	-0.57019
																11575141	-0.567695
																11575166	-0.650555
																11575186	-0.698766
																11575214	0.0664094
																11575215	-0.693674
																11575313	-0.678422
																11575364	-0.696219
																11575391	-0.693674
																11575404	-0.595192
																11575534	-0.675883
																11575549	-0.698766
																11575570	0.279122
																11575574	-0.696219
																11575658	-0.696219
																11575741	-0.680961
																11575806	-0.696219
																11575815	-0.698766
																11575850	-0.223788
																11575863	-0.678422
																11575871	-0.698766
																11575872	-0.693674
																11575925	-0.698766
																11575932	-0.698766
																11575988	-0.688586
																11575990	-0.698766
																11576030	-0.595192
																11576034	-0.698766
																11576068	-0.698766
																11576079	-0.698766
																11576108	-0.698766
																11576123	-0.21909
																11576131	-0.696219
																11576147	0.279122
																11576190	-0.655613
																11576466	-0.582678
																11576511	-0.691129
																11576525	1.5698
																11576562	-0.688586
																11576618	-0.696219
																11576649	-0.688586
																11576692	-0.696219
																11576776	-0.698766
																11576820	-0.696219
																11576823	-0.693674
																11576836	-0.691129
																11576860	-0.696219
																11576938	-0.696219
																11576956	-0.698766
																11577004	-0.696219
																11577059	-0.21909
																11577060	-0.691129
																11577063	-0.698766
																11577107	-0.688586
																11577150	-0.640453
																11577159	-0.698766
																11577169	-0.698766
																11577310	-0.691129
																11577314	-0.698766
																11577336	-0.698766
																11577347	-0.696219
																11577430	-0.698766
																11577448	-0.696219
																11577487	-0.698766
																11577488	-0.698766
																11577498	-0.698766
																11577527	-0.340141
																11577598	-0.668274
																11577614	-0.691129
																11577668	-0.693674
																11577679	-0.673346
																11577753	-0.691129
																11577757	-0.698766
																11577761	-0.575182
																11577901	-0.693674
																11577908	-0.698766
																11577918	-0.686043
																11577933	-0.698766
																11577988	-0.696219
																11577993	-0.698766
																11577994	-0.698766
																11577995	-0.527919
																11577996	-0.696219
																11578052	-0.527919
																11578142	-0.698766
																11578166	-0.698766
																11578177	-0.696219
																11578189	-0.698766
																11578202	-0.691129
																11578333	-0.688586
																11578387	-0.698766
																11578391	-0.698766
																11578403	-0.698766
																11578453	-0.698766
																11578471	-0.698766
																11578505	0.577895
																11578527	-0.696219
																11578582	0.319231
																11578602	0.0641885
																11578624	-0.595192
																11578668	-0.696219
																11578691	-0.693674
																11578751	-0.698766
																11578761	-0.698766
																11578789	0.321332
																11578792	-0.693674
																11578833	-0.691129
																11578856	-0.698766
																11578859	-0.630366
																11578874	-0.693674
																11578878	-0.698766
																11578879	-0.605221
																11578884	-0.691129
																11578895	-0.698766
																11578900	-0.698766
																11578901	-0.698766
																11579004	-0.698766
																11579112	-0.678422
																11579118	-0.683502
																11579157	-0.688586
																11579189	-0.696219
																11579255	-0.698766
																11579295	-0.691129
																11579390	-0.686043
																11579457	-0.693674
																11579515	-0.698766
																11579530	-0.698766
																11579539	-0.698766
																11579586	-0.67081
																11579615	-0.698766
																11579712	-0.696219
																11579716	-0.698766
																11579735	-0.698766
																11579747	-0.572685
																11579770	-0.340141
																11579809	-0.675883
																11579835	-0.698766
																11579858	-0.698766
																11579871	-0.698766
																11579881	-0.698766
																11579910	-0.698766
																11579928	-0.698766
																11579938	0.160946
																11579968	-0.698766
																11579985	-0.550261
																11580042	-0.698766
																11580119	-0.66574
																11580151	-0.562709
																11580160	-0.698766
																11580165	-0.698766
																11580177	-0.698766
																11580178	-0.698766
																11580189	-0.698766
																11580209	-0.698766
																11580210	-0.698766
																11580238	-0.698766
																11580310	-0.691129
																11580327	-0.698766
																11580368	-0.698766
																11580395	-0.698766
																11580402	-0.698766
																11580442	-0.696219
																11580474	-0.698766
																11580525	-0.698766
																11580526	-0.67081
																11580656	-0.698766
																11580677	-0.693674
																11580705	-0.340141
																11580732	-0.678422
																11580734	-0.696219
																11580789	-0.642977
																11580811	0.163122
																11580910	-0.550261
																11581062	-0.698766
																11581068	-0.67081
																11581129	-0.698766
																11581144	-0.698766
																11581150	-0.696219
																11581167	-0.686043
																11581179	-0.605221
																11581227	-0.340141
																11581277	-0.698766
																11581327	-0.698766
																11581330	-0.605221
																11581342	-0.605221
																11581347	-0.698766
																11581393	-0.698766
																11581487	-0.696219
																11581608	-0.567695
																11581640	-0.660674
																11581657	-0.698766
																11581735	-0.698766
																11581769	-0.698766
																11581796	-0.696219
																11581882	-0.592687
																11581921	-0.698766
																11581944	-0.698766
																11581961	-0.565201
																11581996	-0.698766
																11582040	-0.691129
																11582079	-0.678422
																11582100	-0.698766
																11582163	-0.600205
																11582196	0.130373
																11582205	-0.696219
																11582411	-0.698766
																11582419	-0.38108
																11582494	-0.698766
																11582499	-0.698766
																11582547	-0.648028
																11582554	-0.698766
																11582557	-0.686043
																11582566	-0.698766
																11582608	-0.698766
																11582647	0.0973952
																11582754	-0.696219
																11582773	-0.698766
																11582775	-0.686043
																11582782	0.139128
																11582808	-0.698766
																11582814	-0.696219
																11582839	-0.698766
																11582844	-0.696219
																11582876	0.215044
																11582919	-0.698766
																11582925	-0.691129
																11582945	-0.698766
																11582946	-0.696219
																11583021	-0.698766
																11583099	-0.66574
																11583112	-0.698766
																11583126	-0.698766
																11583132	-0.680961
																11583159	-0.575182
																11583180	-0.595192
																11583187	-0.698766
																11583202	-0.510599
																11583203	-0.698766
																11583411	-0.567695
																11583429	-0.680961
																11583510	-0.696219
																11583565	-0.693674
																11583647	-0.698766
																11583660	-0.696219
																11583696	-0.686043
																11583748	-0.698766
																11583753	-0.698766
																11583817	-0.57019
																11583865	-0.698766
																11583905	-0.698766
																11583948	-0.653084
																11583954	-0.698766
																11584044	-0.683502
																11584056	-0.698766
																11584087	-0.698766
																11584088	-0.683502
																11584090	-0.698766
																11584135	-0.686043
																11584144	-0.663207
																11584149	-0.698766
																11584154	-0.698766
																11584195	-0.683502
																11584206	-0.693674
																11584281	-0.698766
																11584285	-0.698766
																11584343	-0.698766
																11584350	-0.693674
																11584411	-0.595192
																11584582	-0.698766
																11584645	-0.698766
																11584661	-0.698766
																11584693	-0.698766
																11584721	-0.650555
																11584741	-0.698766
																11584798	-0.693674
																11584840	-0.698766
																11584863	-0.600205
																11584890	-0.698766
																11584967	-0.691129
																11584972	-0.698766
																11584994	-0.678422
																11584995	-0.698766
																11585012	-0.698766
																11585017	-0.698766
																11585087	-0.696219
																11585142	-0.698766
																11585169	-0.235549
																11585211	-0.698766
																11585260	-0.698766
																11585297	-0.686043
																11585298	-0.698766
																11585299	-0.691129
																11585317	-0.698766
																11585318	-0.698766
																11585334	-0.691129
																11585355	-0.696219
																11585360	0.0128267
																11585380	2.32239
																11585454	-0.642977
																11585458	-0.698766
																11585560	-0.688586
																11585590	-0.57019
																11585605	-0.698766
																11585631	-0.693674
																11585659	-0.691129
																11585682	-0.698766
																11585696	-0.693674
																11585701	-0.696219
																11585710	-0.698766
																11585780	-0.696219
																11585800	-0.645502
																11585865	-0.691129
																11585942	-0.698766
																11585943	-0.698766
																11586012	-0.653084
																11586025	-0.696219
																11586031	0.688652
																11586045	-0.686043
																11586060	-0.698766
																11586100	0.404531
																11586119	-0.693674
																11586154	-0.698766
																11586163	0.383884
																11586181	0.579866
																11586191	-0.63793
																11586317	-0.698766
																11586328	-0.627847
																11586330	-0.698766
																11586395	-0.471198
																11586474	-0.337742
																11586510	0.379742
																11586545	-0.698766
																11586555	-0.698766
																11586582	2.34702
																11586593	-0.57019
																11586601	2.12471
																11586613	-0.693674
																11586629	-0.698766
																11586642	2.12643
																11586669	-0.696219
																11586714	-0.691129
																11586743	-0.698766
																11586758	0.994117
																11586783	2.24239
																11586837	0.447558
																11586853	-0.698766
																11586867	-0.698766
																11586896	0.522277
																11586932	-0.696219
																11586933	2.26046
																11586948	-0.562709
																11586997	-0.698766
																11587009	-0.675883
																11587080	-0.57019
																11587088	2.41578
																11587152	-0.698766
																11587170	2.47817
																11587175	-0.686043
																11587265	2.12729
																11587293	2.48456
																11587314	-0.683502
																11587335	2.48456
																11587367	-0.698766
																11587481	-0.698766
																11587495	-0.691129
																11587501	-0.698766
																11587502	-0.673346
																11587505	-0.698766
																11587528	-0.698766
																11587547	-0.691129
																11587624	-0.698766
																11587655	2.41655
																11587662	-0.698766
																11587671	2.34756
																11587672	-0.698766
																11587688	-0.673346
																11587730	-0.696219
																11587776	-0.698766
																11587782	2.4786
																11587854	-0.663207
																11587861	-0.698766
																11587863	-0.698766
																11587954	2.47817
																11587960	-0.605221
																11587961	-0.698766
																11588014	-0.698766
																11588036	-0.691129
																11588037	-0.698766
																11588108	-0.698766
																11588109	-0.678422
																11588110	-0.683502
																11588143	-0.696219
																11588148	-0.698766
																11588153	-0.66574
																11588194	-0.698766
																11588213	-0.698766
																11588328	-0.330551
																11588359	-0.660674
																11588398	-0.698766
																11588403	-0.698766
																11588439	-0.698766
																11588489	2.48408
																11588544	-0.330551
																11588570	-0.696219
																11588596	-0.461388
																11588639	-0.691129
																11588641	-0.698766
																11588643	2.48408
																11588717	-0.698766
																11588750	-0.698766
																11588759	-0.698766
																11588860	-0.698766
																11588892	-0.675883
																11588899	-0.691129
																11588970	-0.650555
																11588971	-0.698766
																11588993	-0.698766
																11588999	-0.698766
																11589003	-0.698766
																11589070	-0.642977
																11589083	-0.698766
																11589106	-0.683502
																11589116	-0.698766
																11589167	-0.698766
																11589258	-0.696219
																11589380	-0.698766
																11589412	-0.698766
																11589460	0.44348
																11589497	2.4826
																11589592	-0.698766
																11589746	-0.565201
																11589850	-0.698766
																11589859	-0.693674
																11589861	-0.698766
																11589956	-0.698766
																11589984	-0.696219
																11590025	-0.696219
																11590036	-0.698766
																11590046	-0.612754
																11590088	-0.620296
																11590100	-0.698766
																11590120	-0.683502
																11590142	-0.698766
																11590200	-0.691129
																11590201	-0.550261
																11590267	-0.698766
																11590299	-0.698766
																11590300	-0.673346
																11590301	-0.698766
																11590306	-0.693674
																11590310	-0.698766
																11590320	-0.640453
																11590325	-0.693674
																11590332	-0.686043
																11590342	-0.535357
																11590374	-0.146804
																11590383	-0.0549758
																11590393	-0.683502
																11590397	-0.691129
																11590442	2.4025
																11590459	-0.698766
																11590475	-0.696219
																11590515	-0.688586
																11590516	-0.680961
																11590540	-0.313808
																11590605	-0.648028
																11590618	-0.698766
																11590630	-0.698766
																11590631	2.45205
																11590643	-0.688586
																11590727	-0.615267
																11590735	-0.580178
																11590769	2.33718
																11590842	2.34756
																11590847	-0.565201
																11591036	-0.696219
																11591077	-0.698766
																11591090	-0.698766
																11591091	-0.680961
																11591113	-0.696219
																11591149	-0.698766
																11591270	-0.698766
																11591300	-0.698766
																11591312	-0.698766
																11591323	-0.675883
																11591334	-0.698766
																11591335	-0.698766
																11591354	-0.610242
																11591356	-0.698766
																11591442	-0.698766
																11591456	-0.318587
																11591487	-0.698766
																11591506	-0.696219
																11591527	-0.648028
																11591568	2.34486
																11591592	-0.698766
																11591653	2.33829
																11591664	-0.698766
																11591699	-0.698766
																11591791	-0.691129
																11591807	-0.686043
																11591809	-0.688586
																11591811	-0.698766
																11591821	-0.698766
																11591822	-0.693674
																11591953	-0.316197
																11591960	-0.696219
																11591989	-0.698766
																11591999	-0.698766
																11592005	-0.698766
																11592006	-0.698766
																11592020	0.999345
																11592075	1.91502
																11592086	-0.693674
																11592104	-0.696219
																11592110	-0.698766
																11592146	-0.698766
																11592223	-0.698766
																11592297	-0.696219
																11592364	-0.698766
																11592381	-0.688586
																11592397	2.23741
																11592430	-0.698766
																11592432	-0.698766
																11592443	-0.698766
																11592508	-0.693674
																11592518	-0.698766
																11592525	-0.693674
																11592554	-0.688586
																11592584	2.2785
																11592585	-0.696219
																11592660	-0.698766
																11592706	-0.698766
																11592728	-0.693674
																11592739	-0.698766
																11592778	-0.645502
																11592797	2.1809
																11592826	2.34378
																11592830	-0.693674
																11592831	-0.592687
																11592846	-0.696219
																11592851	-0.66574
																11592883	-0.691129
																11592945	-0.696219
																11592978	-0.698766
																11593007	-0.508129
																11593038	-0.698766
																11593059	-0.698766
																11593127	-0.696219
																11593215	-0.698766
																11593243	-0.698766
																11593257	-0.696219
																11593294	-0.698766
																11593336	2.45067
																11593370	-0.691129
																11593372	-0.680961
																11593396	-0.696219
																11593711	-0.698766
																11593742	-0.698766
																11593752	-0.698766
																11593829	-0.668274
																11593842	-0.693674
																11593843	-0.693674
																11593845	-0.698766
																11593860	-0.698766
																11593882	-0.698766
																11593943	-0.696219
																11593974	-0.698766
																11593980	-0.698766
																11593999	-0.696219
																11594039	0.112813
																11594043	-0.698766
																11594090	-0.698766
																11594138	-0.617781
																11594160	-0.696219
																11594205	-0.560217
																11594217	-0.698766
																11594361	-0.650555
																11594384	-0.688586
																11594487	-0.675883
																11594508	-0.0618064
																11594551	-0.698766
																11594554	-0.698766
																11594601	-0.696219
																11594618	-0.698766
																11594650	-0.698766
																11594754	-0.691129
																11594756	-0.675883
[truncated: 1,981 more rows]
